# Supplementary material for: IL-21/type I interferon interplay regulates neutrophil-dependent innate immune responses to Staphylococcus aureus
Source: eLife. 2019 Apr 16;8:e45501. doi: 10.7554/eLife.45501 (PMC6504231; doi:10.7554/eLife.45501)
Supplement: Supplementary file 1. [file elife-45501-supp1.xlsx]

## Sheet: Supplementary.Tables.WT.PBS.IL2
symbol	WT.PBS.7h	WT.IL21.7h	WT.PBS.24h	WT.IL21.24h	logFC	logCPM	PValue	FDR	ratio
Cxcl9	7.12202	32.2099	97.9461	213.427	2.17715	7.99299	2.13097e-92	2.1787e-88	4.5226
Gzmb	5.81899	31.8855	5.34226	16.409	2.45407	4.39874	3.87973e-90	1.98332e-86	5.47959
Gm4763	7.26387	28.5662	5.54265	4.79529	1.97551	3.35264	1.02581e-50	3.49597e-47	3.93267
Muc5b	5.11654	13.8307	6.61117	4.09799	1.43463	6.79404	1.64331e-50	4.2003e-47	2.70313
AU040972	26.124	74.2387	67.2426	54.3349	1.5068	5.84869	1.52496e-48	3.11824e-45	2.84179
Clca3	9.19042	25.8093	3.27712	8.20944	1.48969	5.0941	2.14033e-47	3.64713e-44	2.80829
Rpl22l1	113.79	38.6772	74.5693	89.5063	-1.55682	5.24074	3.28466e-45	4.79749e-42	0.3399
Olfr1033	62.5936	24.8465	12.9114	18.6785	-1.33297	6.80034	2.51508e-44	3.21427e-41	0.39695
BC048546	2.74193	8.21078	6.0346	4.09193	1.58233	4.63165	1.75107e-42	1.98922e-39	2.99454
Gbp4	18.6069	42.2413	87.3919	182.131	1.18282	8.55023	3.31537e-35	3.38963e-32	2.2702
Zfp457	3.56775	10.7771	3.26616	3.81549	1.59489	3.50784	1.22029e-34	1.13421e-31	3.02071
Ifng	0.811346	5.52135	2.89011	11.6146	2.76672	2.66685	1.04888e-33	8.93647e-31	6.80557
Ngp	298.001	640.345	38.3827	20.6094	1.10353	8.17753	5.44927e-33	4.28564e-30	2.1488
Pigr	32.9834	71.3757	96.2529	90.2031	1.1137	8.12864	2.54502e-32	1.85859e-29	2.16399
Chad	8.26807	21.2867	6.02578	3.54087	1.36433	4.01826	4.27848e-32	2.91621e-29	2.57457
Atp5e	182.567	79.5605	131.464	146.266	-1.1983	5.80569	1.16316e-31	7.43257e-29	0.435787
Ccl3	164.768	350.744	129.512	166.324	1.08998	7.32451	4.40335e-31	2.64823e-28	2.12872
Retnla	508.619	1048.38	661.519	586.298	1.0435	8.71205	1.24368e-29	7.06412e-27	2.06123
Ifit1	18.9601	40.7358	61.9749	130.77	1.10333	7.37975	3.83683e-29	2.06462e-26	2.14851
A630089N07Rik	27.9504	59.3105	24.4305	26.5111	1.08542	6.20303	7.12198e-29	3.64076e-26	2.12199
Cxcl10	218.702	447.224	308.425	632.687	1.03203	8.78787	7.87955e-29	3.83622e-26	2.0449
Agr2	1.85234	9.06841	10.1582	10.6545	2.29156	2.60086	8.64788e-28	4.01891e-25	4.89584
Cd274	24.7412	50.5474	96.4213	178.307	1.03072	8.31468	2.84491e-27	1.26462e-24	2.04305
Basp1	29.1447	60.5239	33.8023	46.9182	1.05427	6.30497	5.4301e-27	2.31322e-24	2.07667
Tmsb10	317.723	631.433	431.339	493.016	0.99086	8.22111	1.46534e-26	5.99267e-24	1.98737
Ifit3	24.1398	49.5387	136.304	199.881	1.03714	7.6779	9.26726e-26	3.63839e-23	2.05216
A130040M12Rik	13.972	28.7759	5.62172	5.78119	1.04232	5.44835	9.60843e-26	3.63839e-23	2.05954
Dub1	2.76003	7.22243	1.73974	1.95716	1.38781	3.18608	1.393e-25	5.08643e-23	2.61681
Hipk2	6.44517	13.5953	4.15063	3.98673	1.07682	4.90908	5.12124e-25	1.8055e-22	2.10938
Tarm1	19.1317	41.7055	11.7413	11.2057	1.12428	4.32828	4.44104e-24	1.51351e-21	2.17992
Tspo	143.109	72.2986	125.924	161.059	-0.985078	6.74914	5.40565e-24	1.78282e-21	0.505198
2410018M08Rik	15.3868	6.98347	11.0064	11.6664	-1.13969	4.813	5.86282e-24	1.86815e-21	0.453858
Bpifb1	49.8165	97.2582	59.3895	51.7225	0.965195	6.75525	6.02984e-24	1.86815e-21	1.95233
Lars2	53.535	27.6377	89.1173	93.3536	-0.953847	7.99916	7.98829e-24	2.40213e-21	0.516254
Gm12839	41.1574	17.0146	30.6259	30.6558	-1.27438	4.07907	8.40316e-24	2.45468e-21	0.413402
Reg3g	97.6522	190.217	135.768	100.107	0.961919	6.66366	1.41787e-23	4.02676e-21	1.9479
Rps14	970.051	512.196	565.681	657.229	-0.921364	8.65752	1.68709e-23	4.66183e-21	0.52801
Batf2	1.94706	6.45961	16.0941	29.9743	1.73017	4.22697	7.44975e-23	2.00437e-20	3.31768
Muc4	4.71856	9.17665	9.64213	7.7375	0.959622	6.46272	1.56126e-22	4.0929e-20	1.9448
Gm20337	5.90192	14.8339	4.09002	4.03807	1.32965	3.05	2.24643e-22	5.74188e-20	2.51342
Tnc	11.7318	22.332	20.9231	22.8042	0.928692	7.1098	2.80163e-22	6.98631e-20	1.90355
Creb3l1	7.29691	15.6319	14.6075	14.3946	1.09914	4.88383	2.96594e-22	7.21993e-20	2.14226
Mir703	82.5819	25.101	33.4307	53.0406	-1.71811	2.42239	4.00952e-22	9.53333e-20	0.303948
Gbp2	117.802	217.732	626.224	1160.04	0.886182	10.3469	7.21962e-22	1.67758e-19	1.84828
3000002C10Rik	10.1354	22.2762	17.6792	16.817	1.13611	4.42069	7.83094e-22	1.77919e-19	2.19787
Gm15421	21.7221	8.75463	11.6056	16.0397	-1.31105	3.565	8.08621e-22	1.79725e-19	0.403027
Rps15a-ps4	25.9268	10.5415	16.0764	21.038	-1.29837	3.68765	8.27221e-22	1.79947e-19	0.406586
Gp49a	395.614	723.553	88.5597	98.3994	0.871005	8.73529	1.85229e-21	3.94539e-19	1.82894
Ccl11	50.7847	96.5422	3.88903	3.09612	0.926768	5.37302	3.60409e-21	7.52004e-19	1.90101
Rpl9	730.919	400.173	514.909	567.179	-0.86909	8.64817	4.48781e-21	9.17667e-19	0.547492
1700009P17Rik	18.1214	37.416	14.2073	14.597	1.04596	4.4493	4.79441e-21	9.61139e-19	2.06475
Gm4951	5.88047	12.4066	25.5831	42.795	1.07711	5.84361	4.95996e-21	9.75204e-19	2.1098
Mir3064	117.651	34.4631	120.336	152.574	-1.77142	2.84373	6.09504e-21	1.17577e-18	0.29292
Atn1	7.78218	15.0818	9.88218	11.0265	0.954568	5.58948	9.19803e-21	1.74149e-18	1.938
Ndufa12	60.7266	117.573	73.5542	70.4863	0.953152	5.49986	1.09424e-20	2.0341e-18	1.9361
Zbp1	5.94382	12.8234	50.7404	82.4339	1.10932	6.23896	4.17433e-20	7.62114e-18	2.15744
Fxyd5	145.681	263.211	142.34	130.009	0.853405	7.60642	5.58056e-20	1.00098e-17	1.80676
Chd7	17.0944	30.7148	6.38645	7.66167	0.845413	7.19059	1.31876e-19	2.32465e-17	1.79678
Gpx2-ps1	12.7473	26.7073	5.5969	5.06938	1.06704	3.67803	2.52742e-19	4.37973e-17	2.09513
Prpf38b	37.3369	67.1982	37.5213	42.1408	0.84782	7.11199	2.81238e-19	4.79019e-17	1.79978
Il17f	6.97198	15.774	0.717835	1.26268	1.17791	2.86978	2.85799e-19	4.79019e-17	2.26249
Gbp6	29.3152	52.467	83.6464	163.358	0.83976	8.47093	4.25408e-19	7.01511e-17	1.78975
Tgtp1	25.365	45.988	166.651	262.498	0.858419	8.4575	5.98222e-19	9.55659e-17	1.81305
Tgtp2	25.293	45.8574	166.177	261.753	0.858419	8.4575	5.98222e-19	9.55659e-17	1.81305
Rps19	546.034	308.783	413.722	448.155	-0.822399	8.07686	9.06553e-19	1.42594e-16	0.565501
Csf2ra	28.3381	51.8373	24.9254	29.1985	0.871248	5.95713	9.3113e-19	1.4424e-16	1.82924
F830016B08Rik	1.6183	3.96392	5.44664	7.19944	1.29246	3.91362	1.06762e-18	1.62916e-16	2.44945
Lilrb4	324.705	567.669	120.014	137.452	0.805923	8.67125	1.3772e-18	2.07067e-16	1.74826
Oasl2	19.031	34.4757	98.3021	140.237	0.857227	7.83929	1.6242e-18	2.40663e-16	1.81155
Psmb4	172.179	96.7387	148.799	176.926	-0.831744	7.14095	2.96278e-18	4.32735e-16	0.56185
Mrps14	12.0248	5.73816	11.3111	12.7035	-1.06736	4.36683	5.91443e-18	8.51678e-16	0.477192
Ranbp1	54.7097	99.1325	73.0841	72.8384	0.857563	5.99758	6.67719e-18	9.48161e-16	1.81197
9130011J15Rik	43.2548	24.25	26.9572	27.5994	-0.834872	6.43935	7.46294e-18	1.04522e-15	0.560633
Sp100	30.7335	54.8091	59.7835	74.6405	0.834606	6.8914	7.5949e-18	1.04933e-15	1.78337
Fcgr2b	56.5822	99.9907	50.0864	53.4812	0.821446	6.65327	7.88521e-18	1.07491e-15	1.76718
Mndal	37.7422	66.9288	37.7396	58.5042	0.82645	6.58327	1.09636e-17	1.4749e-15	1.77332
S100a1	105.016	186.12	115.364	101.956	0.825617	6.28942	1.93945e-17	2.57519e-15	1.77229
S100a11	1379.54	2354.58	1441.87	1273.04	0.771284	9.66644	2.81646e-17	3.69173e-15	1.70679
Irg1	147.602	252.65	86.2212	138.241	0.775426	8.65908	2.88887e-17	3.73871e-15	1.7117
Rps21	715.972	415.563	373.885	440.777	-0.784835	7.57215	4.34921e-17	5.55829e-15	0.580418
Fosl1	17.1747	31.5061	2.19196	2.13052	0.875347	4.50086	4.65161e-17	5.87137e-15	1.83445
Rpl39	588.114	342.102	413.685	490.265	-0.78167	7.49765	8.85622e-17	1.10422e-14	0.581693
Il1a	39.5915	68.8729	29.0533	43.0374	0.798746	6.47823	9.37794e-17	1.15518e-14	1.73959
Rps26	465.737	792.661	513.014	497.683	0.767188	7.98972	1.27331e-16	1.5498e-14	1.70195
Stfa2l1	82.9789	148.868	24.9614	21.6929	0.843219	4.85158	1.91705e-16	2.30588e-14	1.79405
Sp110	19.9145	35.4259	32.9959	47.8655	0.830985	6.046	2.32782e-16	2.7674e-14	1.7789
Gapdh	341.884	574.537	540.123	491.758	0.748893	9.2291	2.99891e-16	3.52424e-14	1.6805
Myh6	13.9058	23.8866	30.6104	13.5904	0.780515	6.96159	3.47941e-16	4.04244e-14	1.71774
Gm17757	4.15068	7.81768	5.88343	11.8786	0.913395	5.0167	4.45919e-16	5.06564e-14	1.88347
Gm18853	4.14211	7.80153	5.87128	11.8541	0.913395	5.0167	4.45919e-16	5.06564e-14	1.88347
B2m	1588.72	2646.21	1763.82	2240.97	0.736063	10.7875	5.53244e-16	6.21578e-14	1.66562
Hsd17b13	2.63005	6.27093	2.89773	2.65179	1.25361	2.65315	5.76871e-16	6.4108e-14	2.38437
Obfc2b	17.1098	32.1488	30.9718	28.0558	0.909939	4.83387	6.06205e-16	6.66435e-14	1.87897
Gzma	28.9325	52.3313	20.063	46.5058	0.854982	5.02262	8.74287e-16	9.50927e-14	1.80874
1700016K19Rik	11.376	22.8441	11.0177	9.28458	1.00583	3.65479	9.83983e-16	1.05897e-13	2.0081
Stard3nl	33.1324	18.0929	30.8041	32.5445	-0.872823	5.20295	1.00131e-15	1.06639e-13	0.546077
Cd22	5.57283	10.1865	3.22867	3.82967	0.870173	4.54956	1.07069e-15	1.12853e-13	1.82788
A430033K04Rik	3.37248	6.74148	3.69503	3.66384	0.99926	3.78323	1.08605e-15	1.13304e-13	1.99898
Tcta	17.0115	8.84403	21.7015	21.7972	-0.943742	4.82254	1.28568e-15	1.32776e-13	0.519883
Gpatch4	13.6083	24.5851	14.3891	15.5682	0.853297	4.91412	1.64418e-15	1.68101e-13	1.80662
Cxcl17	53.8465	93.9035	78.6966	64.4081	0.802327	5.78927	1.73265e-15	1.75392e-13	1.74391
Irak3	12.4125	21.7267	13.9192	14.5248	0.807672	5.53907	2.19514e-15	2.2003e-13	1.75038
1190002H23Rik	268.99	160.8	180.779	180.148	-0.742283	7.49774	2.31132e-15	2.29427e-13	0.597793
Cd68	24.4218	43.8878	62.5143	54.7676	0.84565	5.54866	2.42608e-15	2.38503e-13	1.79707
Ifi205	34.8603	59.7217	44.5646	66.6875	0.77667	6.37596	2.56783e-15	2.50033e-13	1.71317
Ubap2l	23.7528	39.9911	34.6622	31.1522	0.751583	7.044	2.71103e-15	2.61487e-13	1.68364
Ppig	32.1747	53.451	20.9673	24.9994	0.732292	7.69493	2.89565e-15	2.76684e-13	1.66128
Hmgcl	19.2751	10.0953	20.6146	18.8264	-0.933065	4.60642	3.10494e-15	2.93934e-13	0.523745
Fkbp2	39.9258	71.3018	56.7301	53.9868	0.836619	5.16089	3.36564e-15	3.15691e-13	1.78586
Iigp1	99.2363	163.922	301.243	529.787	0.724073	9.73867	3.50528e-15	3.23112e-13	1.65184
Serpinb2	5.8721	11.4394	1.81458	2.7119	0.962066	3.4487	3.50796e-15	3.23112e-13	1.9481
Fcer1g	215.91	359.849	221.084	247.878	0.73696	7.42545	3.6253e-15	3.30938e-13	1.66666
Hcfc1r1	24.4966	43.1935	24.4103	20.4216	0.818231	5.12963	3.66147e-15	3.31282e-13	1.76324
AI607873	11.6333	20.1467	12.3833	16.8098	0.792292	5.73176	4.17262e-15	3.74218e-13	1.73182
Klf5	13.0151	23.451	7.83067	8.2099	0.849468	4.50397	5.79427e-15	5.15136e-13	1.80184
Acaa1b	16.7179	8.85379	9.0629	9.48678	-0.917034	4.20712	6.26958e-15	5.52588e-13	0.529597
Timp1	164.817	273.018	377.598	387.393	0.728133	8.06432	7.19439e-15	6.28679e-13	1.65649
Asb1	5.14339	2.7656	5.15452	5.36287	-0.895132	4.78452	8.06836e-15	6.99076e-13	0.537698
Pcp4l1	16.8089	29.7148	17.2891	11.5841	0.821961	4.8937	8.25235e-15	7.09009e-13	1.76781
Cckar	4.13787	7.9509	18.0188	16.1905	0.942234	5.08485	9.02216e-15	7.68688e-13	1.9215
Hspb6	13.5307	24.773	19.7292	13.9139	0.872536	4.57713	1.10914e-14	9.3718e-13	1.83088
Prg4	2.3267	4.57204	4.9032	6.69267	0.97456	4.30943	1.63651e-14	1.37145e-12	1.96504
Nlrp12	5.52712	2.90059	2.6603	1.94773	-0.930184	3.82442	1.87441e-14	1.55804e-12	0.524791
Rtp4	28.4072	48.3195	61.8199	85.8847	0.766352	6.46445	1.90349e-14	1.56945e-12	1.70096
Ybx1	210.494	341.758	197.239	197.857	0.699195	9.01947	2.13758e-14	1.74837e-12	1.6236
Rabac1	185.19	111.849	117.144	120.914	-0.727447	6.87173	2.17726e-14	1.76669e-12	0.603972
Gbp3	33.9085	56.2098	79.9682	157.139	0.729174	7.75452	2.21393e-14	1.7823e-12	1.65769
Id3	110.409	65.8359	110.201	122.017	-0.745908	6.60542	2.28345e-14	1.8239e-12	0.596292
Cyp1a1	9.37317	16.3848	0.485261	0.301892	0.80575	4.16731	4.09975e-14	3.24929e-12	1.74805
Xcl1	0.81272	4.88317	4.53151	5.85681	2.58719	1.04303	4.40509e-14	3.46444e-12	6.00926
Gbp10	12.6792	21.3986	38.7379	79.948	0.755057	7.07464	4.6109e-14	3.59862e-12	1.6877
Lyar	17.9285	31.0739	18.7403	18.8601	0.793454	5.07145	4.9529e-14	3.83624e-12	1.73322
Ndufb2	45.2098	23.4054	35.1588	38.4196	-0.949797	4.02078	5.06353e-14	3.89244e-12	0.517705
Mid1	19.3656	31.9414	9.5324	7.92762	0.721929	6.09485	6.40395e-14	4.88612e-12	1.64939
Bank1	3.97455	7.40892	1.86974	2.72178	0.898474	3.70231	7.26994e-14	5.50577e-12	1.86409
Comt	47.5777	77.7936	50.4818	48.3154	0.709365	6.92732	7.45239e-14	5.60244e-12	1.63508
Darc	5.34758	11.2367	4.16786	4.49774	1.07127	2.87855	7.63107e-14	5.6949e-12	2.10128
Atpif1	73.0097	123.269	72.3421	76.4198	0.755653	5.54039	8.89608e-14	6.59084e-12	1.6884
Gm8989	5.7825	10.8246	12.3432	22.7923	0.904557	4.78902	9.1461e-14	6.72732e-12	1.87197
Igtp	26.1478	43.467	217.187	388.281	0.73323	8.41565	1.12072e-13	8.18445e-12	1.66236
Cd177	42.1811	68.5642	38.9944	32.7808	0.70086	6.95284	1.15302e-13	8.36064e-12	1.62547
Myc	23.7365	39.2885	6.30512	8.89908	0.727001	5.55364	1.32247e-13	9.52182e-12	1.65519
Sh3bgrl3	206.906	334.224	205.101	203.884	0.691844	7.39213	1.44357e-13	1.03211e-11	1.61535
Il2rg	55.9693	91.2616	67.5243	78.5931	0.705372	6.88589	1.47243e-13	1.04542e-11	1.63056
Ifi204	17.0847	28.6407	36.7177	61.9243	0.745363	6.37303	1.98797e-13	1.40173e-11	1.6764
Gbp7	24.7877	39.9541	67.848	134.416	0.688718	8.53292	2.07957e-13	1.45627e-11	1.61185
Irgm1	68.6467	110.413	171.429	285.244	0.685647	8.4676	2.19563e-13	1.52708e-11	1.60842
Pim3	100.829	62.6752	25.1108	29.81	-0.685941	7.04612	2.30921e-13	1.59523e-11	0.6216
Grk4	13.2258	22.0267	11.0359	11.9024	0.735905	5.56014	2.52064e-13	1.7296e-11	1.66544
4933404M02Rik	5.62298	10.7274	6.53122	6.24064	0.931894	3.67541	2.53983e-13	1.73115e-11	1.90778
Evi2b	11.5229	19.1343	11.1804	10.8978	0.731662	5.7016	2.58317e-13	1.74903e-11	1.66055
Slc25a33	17.4779	9.85934	3.99702	4.87374	-0.82597	4.09238	2.9363e-13	1.97505e-11	0.564103
Rps29	947.125	594.429	637.58	640.756	-0.672049	8.10327	3.76272e-13	2.51439e-11	0.627615
Tmem45b	6.60692	3.00229	3.65707	4.47421	-1.13793	2.81717	3.83969e-13	2.54915e-11	0.454412
Sntn	5.37789	10.8839	9.73915	9.45699	1.01709	3.46376	4.59879e-13	3.03342e-11	2.02383
Kcne4	28.5803	17.2217	6.19181	7.40762	-0.730794	5.19549	4.64442e-13	3.04388e-11	0.602572
1600029D21Rik	95.4134	151.798	28.9776	24.9389	0.669888	7.11914	6.12841e-13	3.99088e-11	1.59095
Inhba	8.42483	15.3427	4.49972	8.12236	0.864836	3.80342	6.68088e-13	4.30343e-11	1.82113
Polr2a	14.4418	23.2777	21.6142	19.0721	0.688703	6.82922	6.69254e-13	4.30343e-11	1.61183
Slfn8	4.10178	7.26804	10.0162	15.4066	0.825318	5.2073	6.87751e-13	4.39473e-11	1.77193
Cetn4	7.37602	14.4644	5.08638	4.91821	0.971601	3.08324	7.22796e-13	4.58998e-11	1.96102
Ccl8	2.19593	7.47104	6.46119	12.155	1.76654	1.87346	1.00149e-12	6.32054e-11	3.40236
Taf1d	32.2137	52.8373	18.1652	20.6709	0.713883	5.40026	1.16073e-12	7.28053e-11	1.64021
4933407C03Rik	40.8754	64.5136	18.1498	22.0369	0.658372	7.36494	1.40674e-12	8.76985e-11	1.5783
Hopx	750.42	479.62	386.316	351.167	-0.645805	9.28144	1.45888e-12	9.03976e-11	0.639136
Chchd2	176.21	110.519	101.15	129.357	-0.672997	6.87936	1.49785e-12	9.2253e-11	0.627202
Gm4070	10.156	16.2084	24.0782	46.6383	0.674405	7.77718	1.55939e-12	9.49003e-11	1.59594
Gvin1	10.1527	16.203	24.0702	46.6228	0.674405	7.77718	1.55939e-12	9.49003e-11	1.59594
Cd80	10.868	18.873	3.99219	3.96264	0.796235	4.00614	1.60293e-12	9.69725e-11	1.73656
Ndufb6	57.3778	32.7897	52.8578	55.8969	-0.807256	4.73396	1.78476e-12	1.07338e-10	0.571468
N4bp1	17.6561	27.9689	22.0741	24.2756	0.663655	7.21716	2.12664e-12	1.2715e-10	1.58409
Reep6	4.55946	8.58652	6.4997	6.0892	0.913216	3.70179	2.27326e-12	1.35127e-10	1.88324
Kdm6b	43.2099	67.5828	7.19422	8.89849	0.645297	7.71979	2.39418e-12	1.41492e-10	1.56406
Mnda	28.8241	46.7608	39.1663	63.2003	0.698025	6.19971	2.55e-12	1.49513e-10	1.62228
Scaf4	7.31695	12.14	8.04601	7.58462	0.730461	5.19846	2.55915e-12	1.49513e-10	1.65917
Gm12185	2.07629	3.80218	7.2123	12.6011	0.87282	5.08171	2.5957e-12	1.50786e-10	1.83124
Ccnk	9.09076	15.3156	7.05924	7.48534	0.75253	4.68236	2.90083e-12	1.6756e-10	1.68474
Rbm25	74.9481	116.861	47.5848	57.8917	0.640836	8.30136	3.10357e-12	1.77288e-10	1.55923
Crebbp	10.2015	16.2524	9.23552	9.42446	0.671877	6.40452	3.10394e-12	1.77288e-10	1.59314
Rbbp6	25.7904	40.4696	17.4939	18.7543	0.650004	7.31207	3.30106e-12	1.875e-10	1.56917
Apol8	7.83736	13.8319	0.0525885	0.0407711	0.819568	3.32912	4.04791e-12	2.28651e-10	1.76488
Foxj1	12.9377	21.2567	15.7648	15.6071	0.71633	5.40264	4.13975e-12	2.32554e-10	1.643
Pabpc1	194.312	301.111	158.762	185.332	0.63192	9.20923	4.43279e-12	2.47655e-10	1.54963
Rsrc2	10.6549	17.2254	12.3916	11.956	0.693017	5.78992	4.65217e-12	2.58499e-10	1.61666
Aqp4	1.64945	3.12616	4.77652	3.73106	0.92241	4.07995	4.70333e-12	2.59929e-10	1.89528
Prr13	125.766	196.761	80.921	83.0751	0.645702	7.22431	4.81654e-12	2.64754e-10	1.5645
Cox6a2	15.5737	28.6002	15.3981	9.93243	0.87692	3.52233	4.85918e-12	2.6567e-10	1.83645
Srgn	867.144	1338.37	350.679	352.5	0.626138	9.41392	5.9543e-12	3.23813e-10	1.54343
Acaa1a	49.2088	30.702	33.508	37.2563	-0.680583	6.05049	6.08849e-12	3.29358e-10	0.623913
Gm12250	6.25631	10.7996	43.2098	93.2009	0.7876	6.69666	6.27641e-12	3.37737e-10	1.7262
1110002B05Rik	31.2994	18.7776	24.7496	27.8554	-0.737121	5.13118	6.43651e-12	3.44539e-10	0.599935
1110005A03Rik	14.8266	7.78397	15.3069	17.6061	-0.929616	3.85579	7.10844e-12	3.77209e-10	0.524998
R3hdm2	15.3289	24.3463	13.4536	13.7681	0.667447	6.15193	7.12063e-12	3.77209e-10	1.58826
Fam189a2	29.4393	18.2895	16.0481	15.6597	-0.686734	5.66276	7.26083e-12	3.82653e-10	0.621259
Slc2a3	40.112	25.5329	4.39441	4.28884	-0.651677	6.20232	7.3214e-12	3.83867e-10	0.63654
Fam173a	25.4412	14.024	23.361	24.744	-0.859272	4.13858	7.54295e-12	3.93398e-10	0.551231
Tspyl2	15.4595	24.937	13.0323	13.3765	0.689797	5.52696	7.58014e-12	3.93398e-10	1.61306
Rsph1	19.9594	33.4126	12.8722	11.8282	0.743329	4.50749	8.55367e-12	4.4168e-10	1.67403
Gm4841	2.74397	5.21686	18.6075	31.9543	0.92692	5.37768	8.62356e-12	4.43051e-10	1.90121
Ifi27l1	63.3689	39.2279	65.3982	63.8325	-0.691897	5.93265	8.81727e-12	4.50311e-10	0.619039
Myeov2	57.9976	34.5945	41.1398	52.2569	-0.745454	4.97263	8.85294e-12	4.50311e-10	0.59648
Tmsb4x	3819.89	2488.88	1993.79	2389.01	-0.618035	10.8065	9.5024e-12	4.80953e-10	0.651558
Gabarapl2	99.9339	62.9473	76.8106	74.5565	-0.666831	6.26765	9.95398e-12	5.0048e-10	0.629889
Unc50	29.8592	17.9849	26.8878	27.9541	-0.731392	5.18201	9.9861e-12	5.0048e-10	0.602323
Pik3ap1	11.8262	19.2578	15.6607	15.4959	0.703458	5.34815	1.55873e-11	7.77387e-10	1.6284
2210039B01Rik	4.97488	10.1127	5.54367	5.77123	1.02345	2.78693	1.91548e-11	9.50673e-10	2.03277
Klhl25	9.48764	5.61842	5.9761	6.3704	-0.755886	4.54164	2.19089e-11	1.08211e-09	0.592182
Snrpb	93.4587	59.4735	83.693	86.0734	-0.652081	6.4997	2.2019e-11	1.08232e-09	0.636362
Ccdc55	22.0933	34.637	12.8314	13.7412	0.648707	6.02014	2.30902e-11	1.12954e-09	1.56776
Gpr18	2.87361	6.23889	2.14031	4.08523	1.11844	2.34314	2.33169e-11	1.1352e-09	2.17112
Dynlrb1	107.958	168.558	118.484	104.143	0.642773	6.42032	2.84398e-11	1.37805e-09	1.56133
Ciz1	9.99743	16.1915	17.1721	16.2784	0.695611	5.48931	3.09673e-11	1.49344e-09	1.61957
Muc1	89.447	137.082	150.322	117.151	0.615938	8.10885	3.13255e-11	1.50362e-09	1.53255
Ccdc11	9.2727	15.5037	3.95757	4.11313	0.741556	4.11757	3.37422e-11	1.61206e-09	1.67198
Gpx2	93.8604	145.186	33.9776	41.401	0.629312	6.391	3.54889e-11	1.68762e-09	1.54683
Plagl1	7.47547	11.915	6.06899	5.92778	0.67254	5.36905	3.66206e-11	1.73337e-09	1.59388
Akap12	300.478	455.241	42.2547	46.3126	0.59937	10.3648	3.78223e-11	1.78201e-09	1.51506
D14Ertd668e	6.35561	10.7368	20.8074	28.9802	0.756461	5.49053	3.82349e-11	1.79318e-09	1.68934
Higd1b	26.4684	14.8578	7.63528	8.20189	-0.833053	3.39978	3.98105e-11	1.85855e-09	0.56134
B4galnt1	34.3034	53.1702	28.9169	29.3885	0.632267	6.49523	4.197e-11	1.95046e-09	1.55
Uqcrfs1	64.7625	41.2159	40.8356	45.5734	-0.651958	5.98207	4.52671e-11	2.09417e-09	0.636416
Odf3b	9.731	17.4384	8.17129	7.786	0.84161	3.49279	4.61276e-11	2.12436e-09	1.79205
Srrm1	41.9969	64.3079	29.3999	29.1556	0.614713	7.26549	4.65202e-11	2.13284e-09	1.53125
Frmd8	9.56497	5.68338	12.5813	13.3269	-0.751013	5.02801	4.72975e-11	2.1588e-09	0.594186
Brd4	22.4858	34.4845	11.7846	13.781	0.616935	6.93703	5.04898e-11	2.29426e-09	1.53361
Rps24	800	1210.95	688.943	690.185	0.598065	9.53455	5.13132e-11	2.32135e-09	1.51369
Gdf15	50.4889	31.5148	2.4143	2.95458	-0.679937	4.56983	5.18694e-11	2.33252e-09	0.624193
Uck2	16.4249	27.0821	13.0085	13.0228	0.721455	4.53943	5.20163e-11	2.33252e-09	1.64884
Ly86	18.6506	31.1813	15.9205	20.6707	0.741461	4.43229	5.25676e-11	2.34309e-09	1.67187
Oat	114.849	75.0953	119.862	115.229	-0.612941	7.83945	5.27341e-11	2.34309e-09	0.653862
Ndufc1	43.7072	24.3482	37.8891	44.416	-0.844061	3.96528	5.29395e-11	2.34309e-09	0.557073
Dab2	35.0251	53.5164	25.5994	24.7018	0.611592	7.2931	5.74868e-11	2.53338e-09	1.52794
Rps15a-ps6	48.5954	29.7478	35.3878	39.2959	-0.708035	4.98098	5.84678e-11	2.56556e-09	0.612153
Nupr1	304.331	463.731	198.436	225.688	0.607649	7.54401	6.03994e-11	2.63899e-09	1.52377
Wiz	5.88176	9.55948	5.10656	5.6733	0.700686	4.82842	6.07618e-11	2.64353e-09	1.62528
Qdpr	25.7707	15.6238	27.5475	29.1029	-0.721993	5.09685	6.13469e-11	2.65767e-09	0.606259
Tspan4	73.9907	47.6386	70.6179	83.4401	-0.635213	6.6635	6.19439e-11	2.66396e-09	0.643846
Tshz2	3.57156	5.9688	4.27286	3.82985	0.740887	4.49793	6.20132e-11	2.66396e-09	1.6712
Pdlim7	36.9215	56.813	13.7596	14.5059	0.62176	6.32065	6.54425e-11	2.79952e-09	1.53875
Echs1	38.6547	24.2677	40.218	40.0206	-0.671607	5.73919	6.73157e-11	2.86765e-09	0.627807
Cd2	10.4486	18.2169	6.06845	9.04007	0.801973	3.65188	7.04453e-11	2.98852e-09	1.74348
Gm17821	19.6176	29.7427	14.076	14.9188	0.600381	7.93955	7.86088e-11	3.32106e-09	1.51612
Ndufa2	85.5047	53.0094	69.8274	72.3128	-0.689757	5.21614	8.18129e-11	3.4422e-09	0.619958
Ccnt1	12.7301	20.4837	10.1019	9.42039	0.686231	4.84402	9.29225e-11	3.8936e-09	1.60907
Ccdc19	6.50822	11.3131	5.8255	5.79403	0.79766	3.7501	9.48069e-11	3.95635e-09	1.73828
Cxcl13	8.29962	14.7991	18.2122	19.7698	0.834397	4.15278	1.01271e-10	4.20893e-09	1.78311
Pyhin1	7.42072	11.9749	11.8087	19.2892	0.690384	5.46587	1.04625e-10	4.32735e-09	1.61371
Pdap1	27.7717	43.0424	33.265	33.4481	0.632144	6.2439	1.05188e-10	4.32735e-09	1.54987
Gm8979	6.65204	10.8526	13.957	24.9393	0.706169	5.59244	1.0539e-10	4.32735e-09	1.63147
2010107E04Rik	119.097	73.8637	93.0178	108.86	-0.689201	5.17338	1.07187e-10	4.38351e-09	0.620197
Ppm1f	21.6096	13.9882	34.2207	32.1151	-0.627457	6.9745	1.10413e-10	4.49744e-09	0.647316
Eaf2	4.26337	7.79663	1.78173	2.60692	0.870861	2.96592	1.12927e-10	4.58162e-09	1.82875
Ssb	91.811	139.017	77.0479	85.5248	0.598522	7.68231	1.15204e-10	4.65553e-09	1.51416
Zfyve21	29.3312	18.0597	26.4873	23.3687	-0.69966	4.99551	1.25401e-10	5.04765e-09	0.615717
1110058L19Rik	8.57032	3.54716	10.4083	10.8872	-1.27271	2.4919	1.31813e-10	5.28493e-09	0.413882
Taok3	25.3821	38.6729	26.3368	27.7157	0.607514	7.00483	1.36651e-10	5.45751e-09	1.52363
Rrbp1	57.0957	85.9474	72.5299	81.5137	0.590072	8.58703	1.41543e-10	5.63087e-09	1.50532
Gnb2l1	438.128	291.446	376.925	404.304	-0.588122	8.8878	1.43864e-10	5.70104e-09	0.665208
Mast4	8.95769	13.6756	5.1796	4.81141	0.6104	6.44415	1.48447e-10	5.85994e-09	1.52668
Marco	14.944	23.8067	25.8825	25.1171	0.671804	5.47836	1.59793e-10	6.25947e-09	1.59306
2010107H07Rik	22.0998	10.7446	14.9874	14.1682	-1.04043	2.65622	1.65055e-10	6.44093e-09	0.486183
Tbcc	18.6657	11.4004	6.90721	8.13768	-0.711306	4.38185	1.66734e-10	6.48169e-09	0.610767
Prdx3	43.7895	27.9163	40.7015	43.8062	-0.649476	5.81984	1.74421e-10	6.75486e-09	0.637512
Cdhr3	10.271	16.3209	7.75656	6.06525	0.668143	4.90108	1.79405e-10	6.92164e-09	1.58903
Foxp4	23.7522	36.154	8.65935	8.90483	0.606096	6.28548	1.99719e-10	7.6764e-09	1.52213
Cav2	149.615	99.5793	136.107	129.676	-0.587336	8.31486	2.03862e-10	7.80631e-09	0.665571
Prf1	2.99167	5.66979	2.3043	4.31426	0.922354	2.98163	2.23165e-10	8.51359e-09	1.89521
Dtx3l	12.6863	19.4667	31.8199	43.1221	0.61774	7.11649	2.25907e-10	8.56589e-09	1.53447
1810022K09Rik	90.0025	141.343	88.8574	83.4272	0.65116	5.34016	2.26212e-10	8.56589e-09	1.57043
Hmga1-rs1	25.2507	39.416	32.4225	41.0057	0.642461	5.78795	2.42357e-10	9.14337e-09	1.56099
Cdkn2d	29.9364	18.5837	6.81395	7.39116	-0.687861	4.32055	2.65057e-10	9.93993e-09	0.620773
Gbp5	59.8316	89.9114	116.506	232.815	0.587597	8.55833	2.65415e-10	9.93993e-09	1.50274
Sod3	59.3675	89.6997	87.4324	71.1408	0.59543	7.29758	2.67331e-10	9.97514e-09	1.51092
Atp5g3	192.51	126.528	159.437	166.859	-0.605474	6.77611	2.80528e-10	1.03917e-08	0.657256
Nme2	162.622	106.741	205.972	220.461	-0.607405	7.04526	2.82696e-10	1.04005e-08	0.656376
Gm561	12.2984	5.15459	12.481	13.9482	-1.25457	2.34813	2.82799e-10	1.04005e-08	0.419118
Gm5918	5.49286	11.399	9.95143	6.69145	1.05329	2.57605	2.88935e-10	1.05881e-08	2.07526
Srxn1	108.324	72.1517	13.7706	15.5584	-0.586254	7.08268	2.90932e-10	1.06232e-08	0.66607
Slc25a23	7.47797	11.9477	10.7465	8.13973	0.676022	5.01082	3.13378e-10	1.14021e-08	1.59773
6820431F20Rik	37.4626	56.2232	28.3523	26.865	0.585715	7.43864	3.14932e-10	1.1418e-08	1.50078
Cox7a2	104.094	67.431	86.0496	92.0904	-0.626406	6.04368	3.16718e-10	1.14421e-08	0.647788
Mrps15	16.6769	27.7408	24.4523	26.1455	0.734165	4.48064	3.22338e-10	1.15813e-08	1.66343
Cyb561	54.8076	36.1069	46.8649	45.8724	-0.602102	6.82836	3.22836e-10	1.15813e-08	0.658793
Tcf7l1	3.31878	5.87018	3.0972	3.36311	0.822758	3.45123	3.38208e-10	1.20903e-08	1.76878
Fyb	23.379	35.7508	17.3554	22.2634	0.612763	6.0474	3.63239e-10	1.29399e-08	1.52919
Stard7	22.836	14.7634	17.3557	15.6762	-0.629289	5.78427	3.78713e-10	1.34443e-08	0.646495
4930455F23Rik	11.3516	18.3182	14.0502	13.1615	0.690388	4.75517	3.9093e-10	1.383e-08	1.61372
Csf2	30.9284	48.5574	5.84698	6.3826	0.65076	4.56903	4.16041e-10	1.46676e-08	1.56999
Tcof1	4.44382	7.19553	4.9549	6.05624	0.695302	4.7148	4.26383e-10	1.49805e-08	1.61922
Ncoa6	10.5068	15.9731	12.8239	11.5357	0.604321	6.44932	4.31108e-10	1.50947e-08	1.52026
X99384	17.0772	11.0767	12.96	11.9614	-0.624551	5.82693	4.63259e-10	1.6165e-08	0.648622
Mmadhc	48.5075	31.2666	31.6927	34.0935	-0.633585	5.56795	4.6924e-10	1.63181e-08	0.644573
Arid5b	23.7205	35.7063	18.024	16.2478	0.590042	6.71859	4.8357e-10	1.67594e-08	1.50529
Myh11	14.6989	22.1567	18.6132	13.9585	0.592034	6.84738	5.00237e-10	1.72784e-08	1.50737
Mx2	3.45116	6.14816	4.09971	5.42336	0.833078	3.53938	5.06401e-10	1.74325e-08	1.78148
Hmga1	20.3852	31.5496	26.0719	32.9927	0.630103	5.79855	5.13915e-10	1.76318e-08	1.54768
Hmgn5	23.4318	36.1249	16.1556	16.4286	0.624525	5.45863	5.17602e-10	1.76989e-08	1.5417
Lgals3bp	42.494	64.1017	120.593	125.981	0.593105	7.5809	5.21354e-10	1.77677e-08	1.50849
Anapc10	3.80719	6.56392	4.73197	5.13097	0.785835	3.82976	5.55329e-10	1.87382e-08	1.72409
Cd52	203.883	306.621	212.564	227.522	0.588711	6.90187	5.67965e-10	1.91016e-08	1.5039
Wisp2	7.01583	3.78659	60.0437	54.1982	-0.88972	5.79506	5.7577e-10	1.93006e-08	0.539719
Cfdp1	42.2436	64.6654	50.7625	49.3475	0.614263	5.9756	6.13324e-10	2.04923e-08	1.53078
Ubxn1	80.888	121.995	78.8942	75.6083	0.592823	6.52889	6.54502e-10	2.17658e-08	1.5082
Pcgf2	4.7327	7.9451	5.5642	5.05067	0.747404	4.00615	6.90473e-10	2.2699e-08	1.67877
Fam169b	4.72155	7.89764	3.21328	3.48228	0.742163	3.77181	7.20264e-10	2.36025e-08	1.67268
Dusp5	5.71184	10.5019	5.22937	6.14254	0.878628	3.00213	8.53569e-10	2.77927e-08	1.83863
Spa17	11.2171	20.137	8.43784	9.52079	0.844157	3.09644	8.59567e-10	2.78991e-08	1.79522
Snrpg	93.5306	58.6781	81.0858	82.6345	-0.67262	4.95859	8.81497e-10	2.85203e-08	0.627366
Ccl5	43.1324	68.5704	26.4348	56.8422	0.668815	4.69712	9.24744e-10	2.98252e-08	1.58977
Pydc3	9.22966	14.4769	15.4604	21.2957	0.649409	5.49826	9.62792e-10	3.08576e-08	1.56853
Lcp2	20.9757	31.6295	23.1618	26.9512	0.592549	6.42665	1.00657e-09	3.20598e-08	1.50791
Wdr96	5.92468	9.15723	3.83585	3.47744	0.628177	5.05929	1.08629e-09	3.44915e-08	1.54561
Sp2	6.18949	9.95234	4.09187	4.05262	0.685217	4.20743	1.34608e-09	4.18435e-08	1.60794
Llph	40.0937	61.0741	34.6542	37.0094	0.607188	5.65119	1.34649e-09	4.18435e-08	1.52329
Eml1	14.9816	9.77217	21.0868	17.9598	-0.616445	6.0531	1.39207e-09	4.31288e-08	0.652276
Ccdc108	6.59908	10.1363	4.735	4.1679	0.619195	5.19754	1.41761e-09	4.37876e-08	1.53602
Sf3a2	9.75701	15.8502	7.84618	8.51707	0.699995	4.13846	1.59357e-09	4.88122e-08	1.6245
Pinx1	6.13419	10.7903	7.18852	7.12475	0.814797	3.40524	1.59461e-09	4.88122e-08	1.75905
Bak1	18.729	28.7374	34.6775	41.7199	0.617658	5.95514	1.60079e-09	4.88552e-08	1.53438
Samd4b	15.0772	22.6384	9.2344	11.4904	0.58641	6.00457	1.74229e-09	5.2858e-08	1.50151
1110032A03Rik	13.053	20.5763	12.0853	10.4261	0.656612	4.64701	1.7556e-09	5.31044e-08	1.57638
Olfr613	6.91912	4.37273	3.89552	5.0855	-0.662057	4.70578	1.84027e-09	5.55013e-08	0.631977
Ube2d1	11.3806	18.4423	19.5942	18.4228	0.696447	4.60358	1.87323e-09	5.63291e-08	1.62051
Olr1	5.44502	8.69699	8.29462	10.5874	0.675581	4.88292	1.88537e-09	5.65278e-08	1.59724
Rps27l	134.472	88.042	137.618	164.776	-0.611043	5.92943	1.90871e-09	5.70605e-08	0.654723
Ccdc66	3.95776	6.62892	6.64328	6.62357	0.744091	4.13646	2.02209e-09	6.00985e-08	1.67492
Mrpl42	24.989	40.3527	46.493	42.237	0.691371	4.68336	2.12595e-09	6.30021e-08	1.61482
Tgfb1	18.0312	27.5428	13.0188	14.6308	0.611182	5.26232	2.31928e-09	6.81389e-08	1.52751
Acta1	12.7269	7.51104	17.9166	15.8145	-0.760796	4.27667	2.34668e-09	6.87463e-08	0.59017
Gps2	31.4364	47.9743	26.0692	25.4449	0.609825	5.32115	2.36752e-09	6.89527e-08	1.52607
Mphosph10	15.201	23.348	15.9696	16.9384	0.619136	5.29952	2.37396e-09	6.89527e-08	1.53596
Vcan	4.51723	6.79154	7.39396	8.10122	0.588299	6.38115	2.43439e-09	7.03083e-08	1.50347
Dscr3	10.3744	6.36916	17.3646	17.7325	-0.703859	4.96431	2.54638e-09	7.33358e-08	0.613928
Gatad2b	11.7666	18.5059	12.6541	10.0985	0.653285	4.66156	2.70092e-09	7.7568e-08	1.57275
C2	27.128	17.9484	20.5613	23.7694	-0.595929	5.88643	2.81039e-09	8.02608e-08	0.661618
Vbp1	40.2066	26.4941	32.5569	35.4216	-0.601761	5.75385	2.92702e-09	8.31274e-08	0.658949
Hilpda	59.7927	39.2484	63.7529	51.6105	-0.607337	5.72372	2.97728e-09	8.43205e-08	0.656407
I830012O16Rik	12.8795	20.011	67.9542	102.79	0.635718	6.67991	3.02178e-09	8.53444e-08	1.55371
Gng11	73.4963	48.3547	49.6193	45.7292	-0.604016	5.50621	3.05933e-09	8.61669e-08	0.65792
Pgam5	15.1614	9.54491	12.6638	12.738	-0.667602	4.70589	3.17801e-09	8.88196e-08	0.629552
Mbd6	9.22023	14.0366	11.6369	12.6118	0.606324	5.5879	3.27477e-09	9.12295e-08	1.52238
Sp140	18.0913	27.3477	17.2597	24.9847	0.596128	5.72826	3.36037e-09	9.31068e-08	1.51165
Sectm1b	3.07695	5.44447	6.19258	4.88572	0.823296	3.51294	4.58241e-09	1.24272e-07	1.76944
Spata18	5.07039	8.54577	5.39801	4.97546	0.753117	3.55246	5.75534e-09	1.54038e-07	1.68543
Ubap2	6.81685	10.4253	7.20123	7.01233	0.61292	5.10445	5.82292e-09	1.5544e-07	1.52935
Kcnc3	7.27008	10.9962	8.82605	8.94962	0.59696	5.51103	6.10022e-09	1.62418e-07	1.51253
Nop14	14.291	21.5664	12.8532	14.4049	0.59368	5.41557	6.13606e-09	1.62948e-07	1.50909
Acot1	16.8548	10.5443	14.0825	11.1894	-0.676699	4.36226	6.27331e-09	1.65732e-07	0.625595
Palmd	14.3696	21.7489	12.8172	11.6803	0.597923	5.18285	7.51443e-09	1.95989e-07	1.51354
Ly6i	26.5738	16.4412	80.6659	112.071	-0.692689	5.69488	7.6125e-09	1.98041e-07	0.6187
Med28	10.6002	6.97381	11.1994	12.0487	-0.604076	5.54449	8.1214e-09	2.10744e-07	0.657893
Elk4	8.77441	13.3071	4.4425	5.06108	0.600822	4.85982	8.34459e-09	2.15988e-07	1.51658
Atox1	99.0845	64.8026	97.9041	96.4948	-0.612608	5.2959	8.40634e-09	2.17036e-07	0.654013
Gm6981	10.3457	6.06043	13.2894	14.9861	-0.771546	4.03817	8.45942e-09	2.1738e-07	0.58579
Megf6	6.37052	4.17345	5.20921	5.12928	-0.61017	5.16797	9.17789e-09	2.35175e-07	0.655119
Fxyd1	61.1024	91.7076	35.0677	27.5993	0.585813	5.07068	1.03275e-08	2.60711e-07	1.50088
Slc35a1	11.6646	7.27509	14.362	15.4002	-0.681099	4.6368	1.04101e-08	2.62151e-07	0.62369
Agpat2	20.6801	12.4173	21.3803	16.6918	-0.735895	3.90126	1.06477e-08	2.67475e-07	0.600445
Acr	5.7001	9.69263	1.01597	1.04997	0.765906	2.72547	1.20751e-08	2.99651e-07	1.70044
Olfm1	6.64414	10.4188	6.37972	6.81307	0.649034	4.36971	1.25453e-08	3.09813e-07	1.56812
2310001H17Rik	10.9507	5.64251	8.27936	9.66101	-0.956628	2.65344	1.328e-08	3.25598e-07	0.51526
Mettl7a2	20.3809	13.2666	8.62495	9.04782	-0.619419	4.51635	1.43898e-08	3.51964e-07	0.650933
Pml	5.34413	8.09508	9.58964	11.9189	0.599091	5.55539	1.52029e-08	3.70964e-07	1.51476
Gm216	3.87647	6.59975	3.34872	3.45634	0.767672	3.18948	1.54833e-08	3.76011e-07	1.70252
Itm2a	15.1278	9.52546	10.4505	10.6675	-0.667348	4.22737	1.55715e-08	3.76511e-07	0.629663
Sdf2	32.105	21.0824	26.6775	29.7918	-0.606755	5.12172	1.55775e-08	3.76511e-07	0.656672
Egln3	9.13699	13.9575	1.72218	1.38422	0.611249	4.13576	1.6531e-08	3.95814e-07	1.52758
Fam174a	20.8122	13.7413	12.5398	15.0391	-0.598915	5.03507	1.66821e-08	3.98499e-07	0.66025
Nrip1	5.51956	8.41032	3.47034	3.32731	0.607608	4.55558	1.81358e-08	4.27235e-07	1.52373
Nr4a3	3.94391	6.80087	1.35609	2.0675	0.786098	2.74931	1.83464e-08	4.31204e-07	1.7244
Rnasek	53.0872	79.6359	55.4849	52.7102	0.585056	5.22912	1.87167e-08	4.37894e-07	1.5001
Mlkl	9.37271	14.7867	21.8859	32.2394	0.657762	5.06009	1.87693e-08	4.38122e-07	1.57763
Bola3	24.8438	39.8581	31.5925	28.4778	0.68199	4.05096	2.01693e-08	4.6866e-07	1.60435
D17Wsu104e	39.7648	26.0062	47.7862	47.2598	-0.612638	5.19996	2.02446e-08	4.69344e-07	0.654
Pdrg1	23.5748	15.1736	31.651	32.6216	-0.635689	4.98659	2.39356e-08	5.46245e-07	0.643633
Rsad2	6.86237	10.3944	47.8966	116.318	0.599029	7.42443	2.42776e-08	5.51587e-07	1.5147
1110065P20Rik	8.25159	4.03884	11.4383	10.5639	-1.03075	2.71863	2.49833e-08	5.63861e-07	0.489457
Spsb3	12.7267	8.09101	11.3458	11.3715	-0.65347	4.41345	2.757e-08	6.20873e-07	0.635749
Ripply3	17.1277	10.9491	23.9349	22.0829	-0.645531	4.82635	2.86811e-08	6.40253e-07	0.639257
Rnf24	4.06854	6.20523	3.48409	3.65608	0.608975	4.60136	3.11451e-08	6.92233e-07	1.52518
Zbtb38	6.3258	9.54734	7.59171	6.91105	0.593851	4.95934	3.28406e-08	7.26758e-07	1.50927
Sox2	4.85724	7.81317	4.91716	6.52461	0.685773	3.89281	3.60027e-08	7.89895e-07	1.60856
Sh3tc2	3.59763	2.18895	6.78607	5.912	-0.716814	4.39403	3.72919e-08	8.14685e-07	0.60844
Brp44	36.9093	24.0697	32.0314	33.7497	-0.616769	4.76118	3.90119e-08	8.48634e-07	0.65213
Socs1	8.98556	14.5508	16.4417	30.8326	0.695419	4.43533	4.11983e-08	8.90511e-07	1.61935
A230050P20Rik	10.9212	16.831	14.0534	15.7778	0.62399	4.60139	4.17304e-08	9.00109e-07	1.54113
Cnot3	6.88438	10.5447	9.74851	9.88872	0.615119	4.75296	4.21094e-08	9.06371e-07	1.53168
Hist1h2ao	3.34093	7.8151	2.4885	3.72262	1.22605	1.1882	4.48654e-08	9.55632e-07	2.33925
Tmc6	12.5656	8.32968	7.0964	8.29068	-0.593143	4.72644	5.21234e-08	1.10333e-06	0.662897
Abtb1	20.033	13.311	11.3229	9.28566	-0.589768	4.66752	5.3833e-08	1.13249e-06	0.66445
Ifi44	2.72704	4.57248	16.5118	27.3179	0.745646	5.21818	5.57327e-08	1.16288e-06	1.67672
Clec12b	9.17472	5.5395	3.85053	3.37059	-0.727914	3.15108	5.6386e-08	1.17311e-06	0.603776
1700021F05Rik	11.0047	17.9453	14.072	15.3984	0.705491	3.71821	5.66131e-08	1.17406e-06	1.6307
Rdm1	9.49882	5.39541	6.15265	6.20047	-0.816022	2.91395	5.72606e-08	1.18404e-06	0.568006
2810432L12Rik	4.81309	2.89252	5.00814	4.58751	-0.73464	3.69531	5.73258e-08	1.18404e-06	0.600968
Hist1h2ap	4.36956	10.1488	3.25468	4.80802	1.21579	1.17986	5.92715e-08	1.2193e-06	2.32268
2700094K13Rik	18.7961	11.1144	13.6155	16.743	-0.758004	3.36308	5.94523e-08	1.22056e-06	0.591314
Cisd1	22.8953	14.546	22.8653	23.6325	-0.654432	4.34367	6.06944e-08	1.24357e-06	0.635326
Pxmp3	17.2106	11.4417	18.8186	19.5092	-0.589005	5.14845	6.56309e-08	1.33402e-06	0.664801
Msr1	5.64657	8.58045	12.89	16.9891	0.603681	5.32977	6.61176e-08	1.34124e-06	1.51959
Slc40a1	9.40307	6.20784	8.3417	8.52023	-0.599044	4.78102	8.46204e-08	1.68647e-06	0.660191
Gmppb	9.38263	5.80954	17.3777	19.5275	-0.691572	4.54539	9.29866e-08	1.83178e-06	0.619179
9930012K11Rik	9.02726	5.63459	5.07809	4.48602	-0.67998	3.59515	9.4321e-08	1.8545e-06	0.624174
Pigt	8.07269	12.1802	8.4102	8.53595	0.593416	4.57443	1.09714e-07	2.12447e-06	1.50882
Pou2f2	3.36172	5.34794	3.57912	5.03936	0.669786	3.85214	1.14956e-07	2.20922e-06	1.59084
Zc3hc1	8.4178	5.19558	7.14496	6.91783	-0.696164	3.68184	1.24728e-07	2.3659e-06	0.617211
1700007K13Rik	7.90936	13.5288	11.073	10.5169	0.774411	3.11962	1.25165e-07	2.3698e-06	1.71049
Polr3d	8.77294	13.3384	8.82482	9.61514	0.604452	4.37986	1.30968e-07	2.47508e-06	1.5204
Nek5	5.96242	9.23732	5.46361	4.58996	0.631579	3.92802	1.31629e-07	2.48297e-06	1.54926
Xpa	13.0399	20.4808	9.87606	9.40406	0.651346	3.66134	1.3609e-07	2.5577e-06	1.57063
Isg15	25.2888	38.2598	129.41	236.874	0.597329	6.3451	1.37575e-07	2.57637e-06	1.51291
Oasl1	3.91295	6.43447	11.0916	15.6607	0.717571	4.30373	1.38991e-07	2.59296e-06	1.64441
Sprr1a	4.82536	9.04833	1.6191	1.81759	0.907026	1.79334	1.45968e-07	2.70357e-06	1.87518
Spns1	10.5253	6.95177	12.6067	12.1559	-0.598404	4.83763	1.58563e-07	2.92627e-06	0.660484
Uap1l1	14.8481	9.70386	22.7226	22.6493	-0.613652	4.88712	1.59368e-07	2.93581e-06	0.65354
Gm5069	4.99317	7.56844	7.0393	6.74849	0.600043	4.56274	1.64857e-07	3.0206e-06	1.51576
Nup85	11.3139	7.39812	15.4373	14.8538	-0.612873	4.72785	1.86592e-07	3.3945e-06	0.653893
Gapt	3.97483	6.49815	1.21296	0.989202	0.709141	2.71365	2.08565e-07	3.74099e-06	1.63483
Ccdc40	3.69637	5.56916	4.25662	3.54929	0.591352	4.41227	2.14914e-07	3.84139e-06	1.50666
Mdk	6.10807	10.3271	5.09497	4.86986	0.757649	2.79539	2.31765e-07	4.13537e-06	1.69073
Tmem205	26.9786	17.841	23.6155	22.2897	-0.596619	4.49378	2.34488e-07	4.17666e-06	0.661302
Ido1	0.583846	1.63135	6.96584	21.1455	1.48247	3.56787	2.61419e-07	4.59236e-06	2.79428
Gas8	8.99952	13.7265	10.263	9.43887	0.609043	4.15897	2.68333e-07	4.70573e-06	1.52525
Gpr182	10.0212	15.1254	27.4999	23.0469	0.593914	5.00423	2.8837e-07	5.0056e-06	1.50934
Fam96b	20.5888	31.5682	26.6828	24.5836	0.616616	4.13959	2.89084e-07	5.00949e-06	1.53327
Mrps2	7.65019	11.5713	10.3588	9.67163	0.596987	4.35366	3.56192e-07	6.00942e-06	1.51255
Pstpip2	7.52589	11.3147	7.53988	8.06585	0.58827	4.28735	3.7507e-07	6.29674e-06	1.50344
Tspan17	10.8029	6.86242	9.06114	9.209	-0.654634	3.8108	3.90972e-07	6.53153e-06	0.635237
Procr	4.54469	7.51607	7.34687	9.30515	0.725801	3.43878	4.11439e-07	6.85107e-06	1.65382
Ctsw	3.59655	6.35662	4.17009	6.82454	0.821654	2.70125	4.84497e-07	7.90031e-06	1.76743
Hirip3	3.46156	5.5448	6.68067	6.00135	0.67972	3.77144	5.03378e-07	8.19512e-06	1.60183
Gm7977	3.56874	7.04472	4.62199	4.44137	0.981145	1.89622	5.08034e-07	8.25777e-06	1.97403
Mir22	44.3865	20.7099	12.1539	13.6067	-1.09983	1.15211	5.63567e-07	9.02936e-06	0.466572
Nxt1	9.32561	5.51085	10.9735	11.7525	-0.75893	3.34309	5.64335e-07	9.02936e-06	0.590934
Vav2	5.16931	3.33638	6.66752	6.33693	-0.631691	4.23068	5.79247e-07	9.23904e-06	0.64542
Atg4c	3.92602	6.02021	6.15974	5.53065	0.616748	4.10706	6.25851e-07	9.92047e-06	1.53341
Gpr171	4.19537	6.61575	1.9454	3.34956	0.657111	3.17189	6.67518e-07	1.04996e-05	1.57692
BC017647	3.50657	5.329	6.19373	5.46589	0.603807	4.31775	6.76662e-07	1.06107e-05	1.51972
Zfp579	5.1726	7.99142	9.94616	10.8062	0.627566	4.19779	7.94578e-07	1.21796e-05	1.54496
Havcr2	5.38433	8.09992	6.14686	7.08353	0.589143	4.18905	8.05273e-07	1.2325e-05	1.50435
Bud13	4.59422	7.15658	5.73721	5.46238	0.639453	3.6682	8.33269e-07	1.27344e-05	1.55774
Snta1	7.14856	4.55068	9.13793	8.17489	-0.651573	3.94382	8.46379e-07	1.28962e-05	0.636586
Hmgn3	10.5341	16.4706	12.8806	13.6062	0.644831	3.61216	9.05457e-07	1.37147e-05	1.56356
Wbscr16	6.1226	3.87079	4.90465	5.8827	-0.661522	3.59193	9.23239e-07	1.39042e-05	0.632211
Fam183b	24.1069	36.4743	19.2738	16.575	0.597435	3.76486	9.23408e-07	1.39042e-05	1.51302
1110034G24Rik	3.83752	2.01478	4.78291	4.36852	-0.92957	2.47714	9.28102e-07	1.39543e-05	0.525015
2010005H15Rik	12.4045	6.74529	3.36544	5.43274	-0.87892	1.90908	9.57265e-07	1.43156e-05	0.543774
Hint2	24.2935	15.4185	22.0663	22.5893	-0.655915	3.64608	9.57732e-07	1.43156e-05	0.634673
Npw	8.13672	4.09211	4.47269	3.59087	-0.991622	1.64681	9.786e-07	1.45438e-05	0.502912
1810029B16Rik	9.25794	14.3928	10.6136	12.3802	0.636592	3.67071	1.03869e-06	1.5302e-05	1.55465
Hint3	11.6334	6.71217	12.1653	11.5656	-0.793432	2.88234	1.0454e-06	1.53787e-05	0.57697
Dnali1	6.46054	9.74486	6.37109	5.46136	0.592989	3.87439	1.07339e-06	1.57001e-05	1.50837
Gm4788	5.72347	3.70848	3.5795	4.15286	-0.626065	3.6377	1.26895e-06	1.84286e-05	0.647941
Rpf1	4.3439	6.83914	6.56898	5.9048	0.654827	3.56213	1.38671e-06	1.99405e-05	1.57443
Nnmt	17.0958	11.1033	12.985	13.6686	-0.622663	3.71569	1.40817e-06	2.01358e-05	0.649471
Alg3	5.94928	9.37101	10.8331	10.0221	0.655493	3.69258	1.43212e-06	2.03644e-05	1.57515
Ctxn1	4.44906	7.45577	3.30217	3.62507	0.744864	2.54082	1.48953e-06	2.10054e-05	1.67582
Ceacam10	8.24057	12.947	1.39732	1.14121	0.651807	2.64898	1.54609e-06	2.15946e-05	1.57113
Gt(ROSA)26Sor	13.2188	8.58462	14.6383	17.2119	-0.622764	4.03018	1.66006e-06	2.30917e-05	0.649426
Znhit3	8.52748	5.01309	5.54294	6.73154	-0.766428	2.67878	1.72211e-06	2.38899e-05	0.587871
Apod	3.92659	6.28501	8.77525	7.51608	0.678643	3.62953	1.78708e-06	2.4525e-05	1.60063
Mettl11a	12.5798	8.14244	8.03116	8.77248	-0.627581	3.5204	1.91887e-06	2.61258e-05	0.647261
Syt5	4.91243	7.66321	2.33119	2.14395	0.641517	2.90834	2.196e-06	2.91206e-05	1.55997
Pla2g1b	17.2988	26.6667	4.7975	4.98026	0.624374	2.90049	2.40588e-06	3.15355e-05	1.54154
P2ry14	4.96664	7.68028	6.284	6.044	0.628893	3.49448	2.97909e-06	3.77425e-05	1.54638
Gm8909	9.21201	5.87597	8.30325	13.9729	-0.648694	3.671	3.21793e-06	4.05174e-05	0.637857
Pdcd2l	8.3518	5.21647	8.51538	7.81874	-0.679018	3.26943	3.41448e-06	4.27291e-05	0.62459
Mrps16	23.8945	15.4457	29.9679	31.1381	-0.629479	3.83436	3.63111e-06	4.51635e-05	0.64641
LOC545261	26.6172	17.6182	16.0915	11.5386	-0.595299	3.4822	3.67675e-06	4.5566e-05	0.661907
Lrrc14	4.07865	2.48923	4.67509	5.192	-0.7124	3.23405	3.88363e-06	4.77813e-05	0.610304
Klhdc8a	2.76097	1.75446	4.09717	4.73245	-0.654154	3.8374	4.17107e-06	5.07075e-05	0.635448
Gatm	2.48588	4.02307	4.51641	7.14308	0.694543	3.42732	4.54796e-06	5.46396e-05	1.61837
Endog	11.2366	7.1472	9.83267	9.0263	-0.652755	3.27224	4.7615e-06	5.6871e-05	0.636064
Ccdc130	3.3358	5.24989	5.709	4.77915	0.654258	3.32906	5.57592e-06	6.50778e-05	1.57381
Cxcl11	0.402762	1.15559	3.68794	8.63571	1.52073	2.49258	5.6635e-06	6.58745e-05	2.86937
Tlr1	3.71061	5.63454	6.65614	7.45165	0.602645	3.91615	5.67622e-06	6.59474e-05	1.5185
1110001J03Rik	15.6613	9.10876	15.3188	12.785	-0.781887	2.5559	5.75853e-06	6.66009e-05	0.581606
2210020M01Rik	5.5748	3.03178	5.43237	5.74404	-0.878771	2.23371	5.79324e-06	6.67664e-05	0.543831
Mgat3	0.78654	1.36145	4.70989	4.99609	0.791559	3.79343	6.86721e-06	7.75805e-05	1.73094
Rsph9	15.0646	9.94533	9.81416	9.48314	-0.599071	3.39097	7.84004e-06	8.73165e-05	0.660179
Gm166	3.22093	4.94014	5.28965	4.38871	0.617079	3.50474	8.13827e-06	8.99521e-05	1.53377
E330013P06	6.5807	9.98744	8.11981	7.21641	0.601876	3.44188	8.35172e-06	9.19138e-05	1.51769
Plekhn1	1.62796	2.8223	3.59187	5.38181	0.793816	2.90057	8.43738e-06	9.23595e-05	1.73365
Tmem149	4.27797	2.33092	4.04322	5.37802	-0.876043	2.2663	9.85162e-06	0.00010569	0.54486
Ppp1r3c	3.74627	2.37337	5.59432	5.41717	-0.658523	3.52476	1.06793e-05	0.000114091	0.633527
Slc25a35	2.20376	3.72556	8.33023	7.12425	0.757496	3.29337	1.07537e-05	0.000114526	1.69055
Pddc1	6.2038	3.88129	10.4783	10.0823	-0.67662	3.52568	1.11779e-05	0.000117939	0.625629
BC017612	10.2055	6.44969	10.705	12.3586	-0.662045	3.2385	1.27123e-05	0.000132084	0.631982
Cd320	2.90029	1.70248	4.53728	4.74653	-0.768571	2.94842	1.32012e-05	0.000136608	0.586999
Slamf7	1.85037	2.84239	3.66253	6.27464	0.619294	3.86791	1.42641e-05	0.000145837	1.53612
Kcne2	6.25522	4.03486	5.09009	4.38542	-0.632544	3.0744	1.43267e-05	0.000146329	0.645038
Tsfm	5.65134	3.35596	7.25455	8.94638	-0.751878	2.90514	1.58633e-05	0.000160105	0.59383
Nkg7	9.90067	14.9547	10.338	20.4738	0.595	3.5073	1.77105e-05	0.000175969	1.51047
Zbed3	4.13675	6.269	3.94472	3.78366	0.59974	3.10973	1.82315e-05	0.000180064	1.51544
Fam118b	7.29231	4.81477	9.75635	10.0008	-0.598913	3.73228	1.90354e-05	0.000186594	0.660251
Nos2	0.752552	1.32066	5.04655	8.85129	0.811415	3.99875	1.93937e-05	0.000189704	1.75493
Hamp	13.9045	22.044	8.53782	4.97762	0.664844	2.29739	1.95324e-05	0.000190553	1.5854
Wrb	3.50059	2.20246	6.81866	5.59784	-0.668489	3.49712	1.97312e-05	0.000191943	0.629165
Ubd	0.359201	1.27947	9.83332	38.8889	1.83289	3.56967	2.15877e-05	0.000207242	3.5625
Tnfrsf23	2.4808	3.72937	5.70682	4.93922	0.588132	3.79436	2.27022e-05	0.00021672	1.5033
Parm1	3.79205	5.69471	5.41901	4.52495	0.58665	3.34626	2.80093e-05	0.00026057	1.50176
6820408C15Rik	4.02129	6.14526	5.82939	5.49555	0.611823	3.18281	2.87468e-05	0.000266704	1.52819
Gm8234	5.64333	3.73065	3.84455	4.37105	-0.597124	3.14601	2.9043e-05	0.000268964	0.66107
Sirpb1a	6.45619	4.0461	5.28139	4.98342	-0.674159	2.68931	3.06562e-05	0.00028085	0.626697
Tmem178	6.13555	4.01332	3.81814	3.91567	-0.612401	2.9334	3.11438e-05	0.000283573	0.654107
Gm1574	5.11962	7.77148	4.56833	4.01396	0.602157	2.88012	3.11753e-05	0.000283573	1.51798
2810432D09Rik	12.8567	8.48596	12.5396	12.8955	-0.599376	3.30229	3.4932e-05	0.00031356	0.660039
Mir5107	41.4251	21.7103	23.7286	29.6119	-0.932149	1.39088	3.61732e-05	0.000322718	0.524077
Apol10b	1.73966	2.92563	6.15918	12.7454	0.749951	3.55597	3.76612e-05	0.000333664	1.68174
1810043H04Rik	16.9686	10.8398	17.3287	21.0316	-0.646543	3.04041	3.96342e-05	0.000349328	0.638809
Snrnp35	5.84517	8.91809	9.49188	9.14257	0.609495	3.1955	4.07542e-05	0.000357657	1.52572
2310009B15Rik	7.67661	4.29309	6.10922	7.11438	-0.838472	1.86919	4.41647e-05	0.000383311	0.559236
2010003O02Rik	9.82498	5.00261	7.28667	8.53225	-0.973802	1.34916	4.59575e-05	0.000396849	0.509163
Olfr56	3.68957	5.54735	6.75708	11.3956	0.588351	3.73005	4.88732e-05	0.000418843	1.50353
Mir5114	78.8824	45.3193	45.964	45.8501	-0.799595	1.74489	5.15797e-05	0.000439093	0.574511
Pgp	9.02218	5.87838	11.5513	11.4325	-0.618063	3.29639	5.40404e-05	0.000458514	0.651545
Ntpcr	4.37218	2.54136	6.98052	6.53531	-0.782769	2.57217	5.87934e-05	0.000489501	0.58125
Hcst	19.5035	12.6303	7.18824	8.59654	-0.626857	2.42133	5.88968e-05	0.00048996	0.647586
1600020E01Rik	14.1711	9.19842	9.95253	10.2214	-0.623498	2.74335	6.14407e-05	0.000507407	0.649095
Ptdss2	4.67037	3.09447	8.18181	6.85008	-0.593848	3.63496	6.19434e-05	0.000510733	0.662573
Tnfrsf4	4.47524	6.95292	1.91566	2.27682	0.635661	2.18917	6.39646e-05	0.000524803	1.55365
Ppp1r36	3.98336	6.11465	4.1997	3.33809	0.618292	2.68912	6.40092e-05	0.000524803	1.53506
Adck1	4.39389	2.91398	4.80431	5.3259	-0.592514	3.32532	6.44938e-05	0.00052793	0.663186
Rhod	5.41098	3.40643	7.16534	7.71148	-0.667635	2.99591	6.57393e-05	0.000536408	0.629538
Mcat	4.74254	3.09943	4.86731	5.40013	-0.61366	3.10839	7.21806e-05	0.000580625	0.653537
1700029F09Rik	5.91141	3.78303	5.46339	6.09915	-0.643968	2.76072	8.35736e-05	0.000656265	0.639951
4833419F23Rik	3.94866	6.46587	1.94633	2.00927	0.711492	1.68391	9.30446e-05	0.000719942	1.6375
Tmed1	5.60518	3.67768	11.0301	11.6916	-0.607971	3.57846	0.000120961	0.000894218	0.656119
Cd3e	4.12997	6.20686	4.68279	4.9738	0.587737	2.85283	0.000127457	0.000933025	1.50289
Tifab	0.906036	1.48201	7.42872	8.84713	0.709922	4.03258	0.000147242	0.00105273	1.63572
Nppa	9.88188	6.52808	16.5945	7.75161	-0.598132	3.08454	0.000156403	0.00110815	0.660609
BC064078	4.11306	6.61203	4.41212	4.21075	0.684893	2.03844	0.000169257	0.00118284	1.60758
2310007L24Rik	4.46943	7.18374	6.39315	4.39214	0.684654	2.15878	0.000170002	0.00118641	1.60732
Txnrd2	3.60054	2.33278	5.06533	4.97758	-0.626168	2.937	0.000212443	0.00142334	0.647895
1600002K03Rik	6.03849	3.45944	7.98737	9.28428	-0.80367	2.14078	0.000228114	0.00150564	0.57289
Tsen54	3.62306	2.369	5.36661	6.18874	-0.612936	3.12148	0.000237989	0.00155875	0.653865
Rpp38	3.52639	5.60211	5.00248	6.32689	0.667789	2.40621	0.000246115	0.00159682	1.58864
Rn4.5s	11.7845	5.41767	14.862	14.8389	-1.1212	1.06498	0.000263481	0.00168575	0.459711
1700013F07Rik	3.78536	6.54499	3.52723	4.11944	0.789977	1.43715	0.000271511	0.00172739	1.72905
Hyi	7.19373	4.67107	6.28059	7.88513	-0.622993	2.60627	0.000310435	0.00193059	0.649323
1700001C02Rik	5.88892	9.00011	4.72458	3.7605	0.611948	2.07222	0.000383986	0.00229181	1.52832
Serf1	3.11759	5.51509	4.4433	6.53213	0.822979	1.55444	0.000441394	0.00257287	1.76905
2410022L05Rik	3.4175	1.84978	5.20316	4.97592	-0.885618	1.65361	0.000596029	0.00329217	0.541256
Cib2	7.76685	5.10974	5.41608	3.8974	-0.604087	2.04791	0.000870779	0.00454691	0.657888
Mx1	1.35779	2.05194	5.78954	8.18253	0.595735	3.60565	0.000923782	0.00477248	1.51124
1700007G11Rik	4.34451	6.54995	2.64207	2.36099	0.592298	1.79456	0.000980464	0.00501966	1.50765
Tstd1	6.57278	3.98396	4.185	5.1193	-0.722317	1.48231	0.00104543	0.00529658	0.606123
Arl10	3.4103	2.06746	4.6944	5.1521	-0.722057	2.02387	0.00118447	0.00589584	0.606233
Ccdc163	4.31657	2.83991	4.71891	5.33265	-0.604048	2.39949	0.00144611	0.00696751	0.657905
Gm12216	3.78432	2.42443	5.40506	7.56791	-0.642404	2.48027	0.00154212	0.00732989	0.640645
Ncr1	1.45039	2.37602	3.17135	5.50218	0.712128	2.20968	0.00172712	0.00800821	1.63822
Rpph1	9.09253	13.8489	3.55268	4.78548	0.607024	1.37437	0.00186182	0.0084865	1.52311
Gbp1	0.482329	0.849086	2.51698	5.14902	0.815923	2.67846	0.00201717	0.00905734	1.76042
Ear10	4.30296	2.30361	5.75467	4.87357	-0.901473	1.05523	0.00232498	0.0101976	0.53534
2610528J11Rik	3.07349	4.639	5.34275	3.94389	0.593948	1.97386	0.0032623	0.0133315	1.50937
Alkbh7	3.18597	1.95199	7.22525	7.40908	-0.706807	2.22308	0.00355976	0.0142639	0.612675
Nmb	5.77758	3.78119	2.93438	3.03612	-0.611638	1.47455	0.00375337	0.014868	0.654453
