# Supplementary material for: IL-21/type I interferon interplay regulates neutrophil-dependent innate immune responses to Staphylococcus aureus
Source: eLife. 2019 Apr 16;8:e45501. doi: 10.7554/eLife.45501 (PMC6504231; doi:10.7554/eLife.45501)
Supplement: Supplementary file 2. [file elife-45501-supp2.xlsx]

## Sheet: Supplementary.Tables.HKM.vs.HKM
symbol	ctl_4h	HKM_4h	ctl_24h	HKM_24h	IL21_4h	HKM_IL21_4h	IL21_24h	HKM_IL21_24h	logFC	logCPM	PValue	FDR	ratio
CEMIP	0.0153289	0.000989915	0.0564684	0.231351	0.00852331	0.000989915	7.04724	10.1612	5.4571	3.98698	3.36112e-31	4.76741e-27	43.9289
ENPP2	0.534851	0.341196	0.816092	0.300721	0.706822	0.603344	15.5725	12.1481	5.33671	3.36676	1.43177e-26	6.76942e-23	40.412
TNIP3	0.544929	0.422641	0.280235	0.336982	0.748016	1.0152	4.25295	8.1791	4.60172	2.29249	2.1556e-20	7.64377e-17	24.2804
ARNT2	0.187585	0.167904	0.432044	0.691414	0.221549	0.187156	4.99618	6.0573	3.13114	3.44232	3.34592e-14	4.31441e-11	8.76126
HSD11B1	0.00479681	0.116668	0.228823	0.39877	0.0413013	0.156046	9.30907	5.2663	3.72386	1.6344	2.56301e-12	2.79644e-09	13.2127
HS3ST1	0.0816126	0.059422	0.573791	0.372251	0.0582454	0.0035909	3.63393	4.33773	3.54314	1.28209	6.43932e-12	6.52395e-09	11.6571
CD163	0.12615	1.39077	3.56434	4.96405	0.145541	1.57273	38.1739	27.8695	2.48912	5.33004	1.09781e-10	7.78569e-08	5.61435
LILRA3	20.5191	22.3918	9.15095	15.1187	24.1822	26.4824	59.5223	65.6586	2.11867	5.54171	2.561e-08	1.21526e-05	4.34292
HNRNPA1P10	2.24753	3.17613	5.08123	1.74367	3.03713	4.91917	6.58048	8.44188	2.27558	2.59492	1.36221e-07	6.23276e-05	4.84194
MIAT	2.45866	2.25552	7.22465	4.73193	10.108	11.0582	19.7479	16.9641	1.84199	6.56275	8.35025e-07	0.0003384	3.58505
CCL2	1.21965	5.56687	33.8307	93.993	1.70501	7.03522	218.91	321.356	1.77355	6.02654	1.79261e-06	0.000651959	3.41895
HEG1	0.921718	1.265	2.35464	1.45145	0.874625	1.18173	4.26373	5.12002	1.81868	4.32998	1.95956e-06	0.000694859	3.52757
HIST1H1C	63.6804	62.006	5.05181	8.78446	66.8828	60.9613	2.78594	1.8511	-2.24683	4.6379	3.96807e-06	0.00137276	0.210687
CD36	0.555779	0.488182	4.328	1.31588	0.515186	0.442985	9.19248	4.49198	1.77138	3.68288	7.71086e-06	0.00254351	3.4138
MME	66.8679	44.4681	71.9861	5.69066	65.0878	35.3813	61.274	1.78134	-1.67566	7.95936	1.62532e-05	0.00452031	0.313022
SLC39A8	3.17719	10.3357	3.10153	3.75489	4.34388	10.4699	8.52365	11.7201	1.64217	4.33545	2.00421e-05	0.00535247	3.12135
FCGR1C	0.750614	2.20912	0.00521902	1.27402	2.48041	1.98655	6.80649	4.95172	1.95873	1.85782	2.06572e-05	0.00535247	3.88719
ARRDC3	199.035	195.72	30.4022	17.9572	216.196	143.397	27.68	5.92195	-1.60043	8.77091	2.07548e-05	0.00535247	0.329778
CTSL	3.04182	5.66013	23.829	17.4326	7.59601	9.24779	112.472	51.91	1.57424	5.5824	2.4986e-05	0.00632861	2.97778
PRF1	10.7374	12.6602	35.8035	16.8837	41.7281	47.0892	73.1843	49.7881	1.56018	6.51042	2.67427e-05	0.00665472	2.9489
LOC103021295	10.5536	10.6179	7.83631	9.60969	10.7121	8.8788	6.29076	2.11682	-2.18294	1.99283	3.04064e-05	0.00718807	0.220226
LOC101927243	1.31134	3.30932	1.8934	10.0052	1.06324	4.43107	2.33489	30.5668	1.61126	2.27938	4.38803e-05	0.0102033	3.05519
C1QC	0.00591212	0.00591212	1.8614	2.55518	0.00591212	0.00591212	6.74748	8.38407	1.71432	1.64066	5.05242e-05	0.0111974	3.28143
RPL17-C18orf32	21.4124	23.0254	17.4057	23.2529	18.977	24.8556	16.6693	8.05055	-1.53027	5.22332	5.71515e-05	0.0124713	0.346212
SLCO4A1	1.19057	6.08434	1.88832	10.0552	2.84491	11.4603	9.54033	28.4488	1.50043	4.64643	5.85616e-05	0.0125854	2.82927
SLC16A6	32.68	36.7242	12.5912	12.9777	32.2523	31.7817	11.4967	4.55414	-1.51081	6.41217	6.386e-05	0.0133204	0.350915
GZMB	15.8569	18.8118	25.8028	21.8278	41.9713	53.0062	74.0671	60.466	1.46997	5.19976	9.19751e-05	0.0189069	2.77016
GNLY	26.0542	30.5951	60.8892	38.2551	44.856	55.5803	123.224	102.971	1.42853	5.58274	0.000126354	0.0252327	2.69172
GBP1	77.1914	189.661	5.35753	5.9997	176.07	237.592	55.9824	16.072	1.42161	8.18564	0.000163118	0.0308489	2.67883
C10orf32-ASMT	0.00258276	3.40366	4.10208	6.82869	0.686191	4.02764	2.22432	18.1615	1.41121	3.75893	0.000175875	0.032415	2.65961
HIST1H2BD	16.0945	9.92214	7.51054	10.8501	19.088	8.78916	5.53954	3.47156	-1.64416	3.04239	0.00017597	0.032415	0.319932
GTF2H2C_2	0.431364	0.400197	4.97666	4.89018	0.61719	1.49614	5.84089	1.64802	-1.56925	2.27611	0.00025352	0.0433244	0.336984
CD302	39.3206	12.4482	40.4575	6.19804	33.568	8.12672	36.1111	2.3449	-1.40231	6.47734	0.000303191	0.0494306	0.378322
TRIM25	14.3206	28.7323	25.5218	24.299	20.5862	33.5826	36.3642	60.0893	1.30621	7.45045	0.000357411	0.0563214	2.47292
NRP1	0.75408	0.573579	1.6135	2.1891	0.575232	0.923444	8.3078	5.85356	1.41903	2.85927	0.000369888	0.0570271	2.67405
CD93	146.274	58.034	53.2033	9.23943	132.973	52.8742	50.5989	3.79185	-1.28491	8.73067	0.000581183	0.0849846	0.410395
MAP1LC3B2	7.88049	11.3808	5.60277	9.06719	10.3634	10.114	6.94799	22.9451	1.3395	3.14695	0.000633631	0.090782	2.53063
GZMA	3.47811	3.73216	19.6431	8.84145	11.5355	10.1208	31.6169	22.1537	1.32522	3.68129	0.000699647	0.0972921	2.50572
CXCR2	972.403	262.71	440.049	56.6909	874.778	207.987	444.861	23.9581	-1.24261	10.1855	0.000713719	0.0982853	0.422608
IFNG	0.0469035	0.00569041	0.324602	0.0446376	0.611959	1.17196	1.37703	0.648041	3.86716	-0.436734	0.00263721	0.261582	14.5926
