# Supplementary material for: IL-21/type I interferon interplay regulates neutrophil-dependent innate immune responses to Staphylococcus aureus
Source: eLife. 2019 Apr 16;8:e45501. doi: 10.7554/eLife.45501 (PMC6504231; doi:10.7554/eLife.45501)
Supplement: Supplementary file 3. [file elife-45501-supp3.xlsx]

## Sheet: Supplementary.Tables.MRSA.4or24
symbol	WT_Cont	IL21RKO_Cont	WT_MRSA_4h	IL21RKO_MRSA_4h	WT_MRSA_24h	IL21RKO_MRSA_24h	logFC	logCPM	PValue	FDR	ratio
0610040J01Rik	9.80648	10.8782	17.877	15.227	23.1634	11.4093	-1.0213	4.96056	5.4853e-34	1.17709e-32	0.492673
1110008P14Rik	23.5736	22.932	26.8517	24.7573	58.5269	37.3831	-0.646509	4.94271	1.10758e-14	1.1333e-13	0.638824
1110012J17Rik	28.1264	26.2893	13.313	13.5664	9.06473	13.8898	0.61562	6.41655	3.2983e-33	6.93194e-32	1.53222
1110021J02Rik	6.84639	5.64249	4.33706	5.9385	5.33983	8.12967	0.606208	4.9875	8.83455e-13	8.10628e-12	1.52225
1110049F12Rik	18.1246	15.762	21.8162	17.0079	21.8765	14.1119	-0.632242	4.75638	1.49347e-12	1.34784e-11	0.645173
1110050K14Rik	103.928	106.488	97.7197	102.963	48.2983	76.9146	0.671238	7.25431	2.13186e-68	8.5498e-67	1.59244
1190002H23Rik	96.0168	98.6779	191.433	147.889	240.323	145.334	-0.725559	7.42257	2.25862e-95	1.25965e-93	0.604763
1600029D21Rik	16.0062	15.8556	65.5504	57.0157	29.1676	14.4529	-1.01274	5.27775	1.7647e-41	4.50988e-40	0.495605
1700034H15Rik	3.05426	2.38031	4.86443	2.72219	3.43733	3.38075	-0.836941	3.99758	3.18526e-12	6.57815e-11	0.559829
1700113A16Rik	9.76133	13.8489	12.9275	12.9141	17.9886	9.56481	-0.910575	3.71071	1.89903e-12	1.70308e-11	0.531973
1810011O10Rik	36.5102	45.4868	21.1315	29.9497	11.3079	29.5993	1.38765	4.8346	2.97876e-48	8.71489e-47	2.61653
1810032O08Rik	2.95217	2.02127	4.85014	3.11875	5.64576	2.35484	-1.2598	2.9319	2.43993e-13	2.33483e-12	0.417602
2010002N04Rik	20.1219	25.0947	44.0361	39.2192	41.1129	24.2683	-0.7604	5.97994	1.40706e-39	3.51618e-38	0.590333
2010016I18Rik	2.25359	2.12456	3.12915	3.59487	9.36657	3.69854	-1.33909	3.27775	1.50528e-18	1.89184e-17	0.39527
2210403K04Rik	14.031	15.7187	49.7664	44.2963	61.9803	27.5003	-1.1722	6.24268	3.7153e-110	2.39659e-108	0.443743
2610507I01Rik	12.6713	18.0575	10.2976	11.1807	7.85963	17.3682	1.14358	5.25286	5.15141e-46	1.45544e-44	2.20928
3830406C13Rik	6.34117	7.40987	3.3874	3.87813	3.23507	6.90215	1.09232	3.70507	1.67846e-15	1.7946e-14	2.13216
4922501L14Rik	1.36571	1.05769	4.2379	4.78155	2.59318	0.551925	-2.22226	1.55338	9.20255e-14	8.99916e-13	0.214305
4930413G21Rik	10.441	13.1051	19.1376	16.7302	32.2831	12.1287	-1.41183	4.8878	1.91743e-58	6.62318e-57	0.375833
4931428F04Rik	3.65714	2.93306	3.09059	2.81232	1.78835	4.50066	1.33018	3.5471	3.46801e-19	4.49581e-18	2.51434
4933407C03Rik	46.5037	48.4868	77.2284	72.2899	97.0708	61.2874	-0.663429	8.45031	4.86923e-161	4.69728e-159	0.631376
4933412E12Rik	3.78528	5.0801	2.61321	3.19275	6.17472	15.93	1.3665	4.31892	2.56568e-33	5.40281e-32	2.57844
5031425E22Rik	18.0319	16.6994	16.2794	12.7572	20.2043	12.868	-0.650721	5.36074	2.12849e-19	2.79312e-18	0.636962
5133401N09Rik	12.7713	13.1212	11.6754	14.693	21.5858	34.3367	0.66951	5.43581	4.43934e-20	6.01347e-19	1.59053
5330417C22Rik	27.2181	30.7322	28.6309	22.4317	9.85803	14.9896	0.604448	5.40051	2.22472e-16	2.48667e-15	1.5204
5430435G22Rik	5.76932	6.24435	2.8612	4.05607	3.49358	9.49731	1.44181	4.1045	1.08432e-31	2.17433e-30	2.71661
9030224M15Rik	13.0152	10.5663	6.25401	7.98691	1.42396	5.27538	1.88467	2.4426	2.59128e-16	2.88735e-15	3.69268
9130017N09Rik	3.08408	3.5771	4.1687	6.30425	9.64334	15.796	0.711723	4.98518	8.80237e-17	1.00916e-15	1.63776
9330133O14Rik	2.03156	2.24402	6.8658	4.89346	10.1422	4.00257	-1.34061	4.24899	6.03272e-35	1.33744e-33	0.394853
9430008C03Rik	2.19593	2.4275	2.85132	3.81995	5.14479	2.30541	-1.15703	3.4958	2.02605e-16	2.26935e-15	0.448436
9430023L20Rik	21.705	18.3723	25.1732	13.9302	29.6804	22.9273	-0.853274	4.53616	8.6911e-18	2.68197e-16	0.553527
9430076C15Rik	0.516743	0.404901	0.672912	0.972827	2.94775	0.989722	-1.57141	2.4958	1.51296e-14	1.54073e-13	0.336478
9930013L23Rik	0.258544	0.236889	0.667961	0.875478	2.6867	0.75171	-1.8357	3.52167	5.01674e-37	1.17291e-35	0.280156
A330021E22Rik	2.14617	2.6636	5.39853	5.17608	5.30818	1.97454	-1.42533	3.48925	1.44947e-23	2.28418e-22	0.372334
A3galt2	0.615322	0.570422	5.2222	2.09344	0.743521	0.476589	-1.3175	3.55456	1.79549e-20	6.29333e-19	0.401229
A430105I19Rik	19.6084	17.7424	14.3728	21.7858	22.9429	23.6729	0.599972	6.44943	2.33566e-30	1.25365e-28	1.51569
A430107O13Rik	21.4705	19.8033	17.7295	17.6856	6.61235	10.4327	0.657724	5.41784	2.61701e-19	3.4216e-18	1.57759
A930001C03Rik	1.09799	0.461065	4.00105	2.78838	9.60645	2.98975	-1.68111	2.74132	3.12179e-19	4.05927e-18	0.311843
A930038C07Rik	23.8967	19.9164	6.78155	13.6823	5.91281	16.349	1.01239	5.64085	6.34053e-45	4.97394e-43	2.01725
AA467197	0.390144	0.124211	4.82296	18.2518	50.8734	40.8958	1.91644	2.98283	4.52064e-22	1.71961e-20	3.77492
Abca1	7.75485	7.89443	10.5857	11.9563	10.0828	6.02679	-0.742344	6.32903	1.10808e-47	3.2199e-46	0.597767
Abca3	124.875	117.907	94.0061	82.5447	53.0403	82.3104	0.63397	8.80379	4.09428e-176	4.34075e-174	1.55183
Abca8a	13.172	13.6669	7.96228	8.3183	1.2231	2.83917	1.21376	3.57208	5.3952e-17	6.22876e-16	2.31941
Abcc1	8.48343	7.38274	13.8315	14.0344	22.3278	14.6263	-0.610217	6.74407	5.15209e-43	1.35716e-41	0.655098
Abcf2	21.2193	20.9298	25.6484	24.1952	41.3399	27.0585	-0.611385	6.42643	5.7641e-35	1.27921e-33	0.654568
Abr	18.5299	17.2508	23.4402	23.493	34.4438	51.8827	0.590981	7.85128	2.31369e-80	1.07952e-78	1.50627
Abtb1	26.2712	20.48	39.5972	35.8861	30.8009	20.49	-0.587928	5.55964	3.08474e-18	3.79889e-17	0.665298
Acacb	5.42033	4.20426	3.66368	2.96913	1.22762	2.42761	0.983009	4.00481	1.05725e-15	1.14123e-14	1.97658
Ace	354.204	320.992	406.647	362.231	225.739	398.977	0.821644	10.6241	0	0	1.76742
Acer3	3.84363	5.83254	6.49027	6.50554	8.53098	5.62096	-0.601685	4.81118	7.40941e-12	6.40355e-11	0.658984
Acot11	4.8939	4.62773	3.9068	4.7598	2.83711	4.89411	0.786259	4.49416	1.08995e-14	1.11632e-13	1.7246
Acta2	84.2389	81.4803	140.048	130.403	63.6143	117.595	0.886345	7.37899	3.07523e-126	2.31085e-124	1.84849
Actc1	91.2527	80.0824	77.2047	69.3322	11.7335	24.299	1.04981	4.69942	1.78081e-27	3.17815e-26	2.07026
Acvr1b	24.9488	23.7076	55.7459	44.105	61.6692	36.1771	-0.769423	7.28367	1.89358e-97	1.07567e-95	0.586652
Ada	2.49645	2.30611	6.7533	5.58137	10.1009	4.28061	-1.23743	3.48268	2.05737e-18	2.55424e-17	0.424127
Adam23	1.31809	1.38187	1.27914	1.45773	1.19532	2.64475	1.14477	3.73303	4.70056e-17	5.43265e-16	2.2111
Adam8	8.50124	6.9946	60.2107	53.1407	42.3378	21.5955	-0.97111	6.54828	1.39119e-93	7.63944e-92	0.510113
Adamts15	27.4119	37.0294	20.5166	29.1923	20.7712	41.7768	1.00806	7.58575	1.31893e-185	1.50245e-183	2.0112
Adamts17	6.75558	5.66962	3.47851	5.4513	0.636342	1.88047	1.5608	2.99791	1.10266e-17	1.31778e-16	2.95017
Adamts4	1.41108	1.33836	82.243	49.5714	23.258	4.57941	-0.730352	7.87499	3.46004e-124	7.80001e-122	0.602757
Adamts5	3.47694	4.0198	3.27277	3.37072	4.26475	2.41666	-0.819132	4.71492	2.40759e-19	3.15357e-18	0.566783
Adamts9	7.96461	10.328	18.1163	18.7484	12.5224	6.38191	-0.972275	5.7827	5.80511e-54	1.89227e-52	0.509702
Adcy2	7.01674	6.46043	7.00139	6.15457	2.03881	4.19129	1.03883	3.76589	9.29519e-15	9.55669e-14	2.05456
Adcy3	8.13511	7.12207	5.61086	5.86046	5.10857	7.73982	0.599183	4.95582	2.70736e-12	2.39887e-11	1.51486
Adcy4	64.445	58.1648	56.2244	49.608	38.6954	63.5144	0.714877	7.47608	1.3388e-89	6.97611e-88	1.64134
Adh1	78.1751	64.5863	22.5634	39.9751	8.79484	35.5079	0.824896	5.43054	2.76299e-27	1.32673e-25	1.77141
Adm	5.45972	5.31753	129.958	98.6822	47.482	11.0787	-2.09888	5.23732	1.08143e-146	9.57018e-145	0.233439
Adora1	1.78751	2.3743	8.171	5.76763	6.20503	3.64217	-0.768364	4.79004	3.29737e-18	4.05609e-17	0.587083
Adora2b	5.39678	5.36113	19.6341	12.6677	28.8579	24.3131	-0.631971	4.85775	1.27855e-12	2.73541e-11	0.645294
Adpgk	9.31796	10.971	13.1545	23.2215	13.1764	9.77176	0.819699	5.53784	6.24316e-29	3.16833e-27	1.76504
Adra1a	5.58542	5.67957	1.26789	1.86708	0.844382	3.17482	1.90776	3.14252	6.10379e-26	1.04242e-24	3.75227
Adra1b	1.97082	2.47909	1.45832	1.77479	1.22155	3.44864	1.49488	2.90265	2.36254e-15	2.50848e-14	2.8184
Aen	9.20048	8.44771	13.3159	11.1114	18.5631	11.0555	-0.747481	5.21569	1.26418e-22	1.92285e-21	0.595643
AF251705	4.79102	4.48372	8.50372	6.61201	6.78419	14.1607	1.0607	3.62973	5.33347e-14	5.27582e-13	2.08595
Afmid	2.63385	2.29651	8.43774	7.43019	5.66892	2.60929	-1.11818	3.21172	4.94376e-13	4.6254e-12	0.460676
AI413582	13.0412	8.91748	8.1375	11.3682	15.2743	29.1539	0.931891	3.87029	3.26269e-13	3.09587e-12	1.90778
AI464131	7.53675	6.90074	3.20626	3.05217	3.08422	5.49655	0.83314	4.20575	1.63967e-13	1.58749e-12	1.78156
AI506816	2.45895	3.39036	9.59092	3.33614	15.6292	9.19338	-1.52227	3.88576	2.36655e-32	1.34793e-30	0.348138
AI607873	2.23558	2.98103	6.26913	6.29101	9.31511	14.3007	0.618294	5.39439	4.34958e-17	5.04334e-16	1.53506
Aif1	2.22732	2.82169	1.55411	5.13247	6.1501	20.6448	1.74527	3.63271	2.36175e-31	4.69195e-30	3.35257
Aim1l	2.4932	3.24884	6.95685	3.97389	0.998102	1.30709	-0.80754	4.65254	3.05218e-17	9.16766e-16	0.571355
Ak1	17.2342	15.6058	7.81044	8.98161	7.27351	15.5585	1.09648	4.62825	2.98407e-28	5.44816e-27	2.13833
Akap12	53.1292	51.485	237.127	225.603	146.773	42.0258	-1.8042	9.11483	0	0	0.28634
Akap2	186.25	194.568	320.358	319.315	242.921	154.751	-0.650535	10.3724	0	0	0.637044
Akap5	111.665	110.584	49.7358	60.8682	34.1418	63.3605	0.892018	8.39418	2.73369e-256	4.40186e-254	1.85577
Akr1b10	7.01233	6.73058	5.1532	5.86792	3.20226	8.07645	1.33266	2.98402	1.65844e-13	1.60493e-12	2.51867
Akr1b8	7.35842	7.43463	30.3187	25.3889	26.9869	13.3582	-1.01412	4.66354	8.97835e-28	1.61716e-26	0.49513
Alas2	61.8917	58.1701	53.5099	71.204	34.1461	51.8963	0.603841	6.44345	1.30518e-32	2.69543e-31	1.51976
Alb	1.50396	0.3009	0.665611	1.18251	0.337555	3.38433	3.3075	2.04774	2.11039e-25	3.55315e-24	9.90046
Aldh1a3	0.226594	0.568745	1.68784	2.41373	9.07131	1.1121	-3.02478	3.98634	5.29192e-106	3.27549e-104	0.122872
Aldh3b1	42.7872	46.0174	40.6346	37.9064	25.4865	46.1264	0.855723	6.07967	5.19859e-49	1.54629e-47	1.80966
Aldh7a1	12.0935	13.1143	9.95212	9.48137	4.81044	9.08231	0.916449	4.47773	7.85137e-19	1.00146e-17	1.88746
Alox12	8.96249	4.67292	5.89822	5.37363	3.55908	7.28727	1.0332	4.07203	7.92895e-18	9.57734e-17	2.04656
Alox15	2.01078	6.09869	1.99401	3.39962	1.56557	4.81101	1.61715	3.02078	7.46881e-19	9.54368e-18	3.06768
Alox5	3.19061	3.32116	12.9815	12.7865	8.90629	5.20013	-0.77588	4.27585	2.04151e-13	1.95971e-12	0.584032
Alpl	1.79855	1.95382	8.2864	6.75255	18.1712	9.21242	-0.979699	5.05441	1.12858e-33	2.40018e-32	0.507085
Amica1	1.43958	2.80095	14.6292	11.8789	7.93885	3.86264	-1.03859	3.80329	1.17821e-16	1.34002e-15	0.486804
Ampd3	9.7112	12.47	52.5076	42.9403	37.2108	18.7171	-0.991275	6.78304	2.33764e-114	1.57431e-112	0.503033
Amph	8.53606	7.82678	4.61438	4.48679	0.860532	2.79858	1.69787	2.62676	1.69353e-15	1.80981e-14	3.24421
Angpt1	11.8214	15.8524	8.33783	11.5085	3.18721	7.93603	1.31548	4.56743	5.58765e-37	1.30496e-35	2.48885
Angptl4	42.1414	57.8514	124.45	92.6606	143.538	64.7188	-1.14911	7.57034	4.86093e-263	8.0699e-261	0.450903
Ank3	9.85852	11.1895	10.1633	8.27495	4.86866	7.53307	0.629611	5.99098	3.49909e-26	6.0384e-25	1.54715
Ankmy2	8.87537	9.38723	5.14488	5.7226	3.86086	7.36636	0.931322	3.82683	6.96839e-13	6.44365e-12	1.90702
Ankrd1	9.48926	11.4062	25.8591	25.4835	36.9895	22.3733	-0.725201	5.67223	6.61661e-29	1.22579e-27	0.604913
Anp32a	69.4956	80.1159	47.3266	52.7166	40.4553	71.1312	0.814082	6.90695	6.17888e-78	2.82147e-76	1.75818
Anpep	23.3562	21.8699	11.9644	14.4652	14.1252	21.5373	0.608464	5.96351	3.69689e-24	5.93943e-23	1.52464
Antxr1	34.5818	35.781	20.2459	23.4872	12.6416	19.7905	0.646556	6.44936	3.52281e-37	8.28151e-36	1.56543
Anxa1	53.7743	65.2838	237.986	269.202	176.654	91.2262	-0.953354	7.49518	2.9674e-172	3.05528e-170	0.516431
Aox3	20.4552	23.7947	16.6072	14.9536	4.85618	11.7518	1.2746	5.24122	6.46107e-55	2.1255e-53	2.41931
Apba1	2.8932	2.99235	2.72517	2.61267	1.73454	3.29347	0.924481	4.10664	4.52397e-15	4.72611e-14	1.898
Apc2	2.17499	1.96374	1.03343	1.14373	0.599356	1.38145	1.20324	3.22753	2.26229e-13	2.16581e-12	2.30256
Apln	28.6526	33.2411	8.52316	14.3952	6.10788	11.1098	0.755899	5.21717	3.05765e-20	1.06131e-18	1.68868
Apoa1bp	67.8993	58.7872	44.9805	41.2749	27.4417	49.8452	0.860827	5.17244	1.44006e-26	2.50938e-25	1.81608
Apol10b	0.884724	1.10844	1.02631	2.94164	4.06369	8.70138	1.09753	3.71912	1.03979e-15	1.12352e-14	2.13988
Apol11b	0.667656	1.18169	0.421224	0.939865	0.363072	2.73413	2.89657	1.78471	2.44515e-18	3.02514e-17	7.44656
Apol6	1.0545	1.32192	1.49254	3.5018	8.05503	34.3781	2.09295	5.71211	7.01418e-169	6.95443e-167	4.2662
Apol8	0.0165607	0.0120499	3.39066	2.46962	1.12231	0.0267172	-5.13857	-0.0826528	3.63798e-12	3.19963e-11	0.0283881
Apol9a	2.42498	1.32895	1.09248	5.53239	5.43507	13.9118	2.33304	2.45122	1.58921e-20	5.59778e-19	5.03866
Apol9b	2.12926	2.04214	1.79711	6.30718	6.7006	15.6184	1.80743	2.74137	4.57215e-17	1.34872e-15	3.50017
Apold1	1.66168	1.46779	33.5043	20.8965	2.26587	1.37586	-0.681001	6.43956	4.76639e-41	3.33585e-39	0.623732
Aqp5	235.3	204.964	143.27	149.284	112.737	173.368	0.620845	7.82619	8.09468e-87	4.09824e-85	1.53778
Arhgef10	19.9122	16.4275	13.2839	12.4835	7.50532	13.1394	0.807769	5.86208	3.92585e-37	9.20876e-36	1.7505
Arhgef25	16.9351	16.454	9.00274	11.6547	9.16198	16.0795	0.8112	4.87657	1.11898e-19	1.48292e-18	1.75467
Arid3a	3.27847	3.66869	6.242	7.68396	11.9358	7.77768	-0.617765	5.68087	1.22055e-21	1.77939e-20	0.65168
Arid5a	7.08906	6.38366	65.483	41.5594	27.0775	17.043	-0.655923	8.21283	2.67714e-126	6.09932e-124	0.63467
Arl15	12.7624	17.6892	7.87291	10.3242	7.71255	12.6539	0.714089	5.13416	1.34066e-18	1.69091e-17	1.64045
Arl2	44.2832	31.4159	29.953	28.7687	25.9449	47.8276	0.882105	5.04774	1.67493e-25	2.82666e-24	1.84306
Armcx4	11.8165	10.9658	9.41114	11.7713	16.922	10.1499	-0.73737	6.89091	1.15456e-68	4.67413e-67	0.599832
Arrb1	82.3555	74.4775	57.3552	54.5675	31.7218	54.0044	0.767574	8.2918	3.68507e-179	4.04715e-177	1.7024
Arrdc2	12.0458	10.3007	25.8431	16.848	19.5123	9.84071	-0.61707	5.60839	1.69981e-19	5.6969e-18	0.651994
Art4	9.57753	11.3713	5.14933	6.33699	2.28127	6.26306	1.45539	3.4187	1.59213e-20	2.1984e-19	2.74231
Artn	0.794513	0.826789	6.23388	4.63422	3.4969	1.0596	-1.71833	2.22359	3.98638e-14	3.98006e-13	0.303901
Asb13	12.9517	12.5647	8.57715	9.62816	10.4482	19.9422	0.932304	5.21569	2.26887e-31	4.51582e-30	1.90832
Asna1	41.7359	37.1051	35.1458	35.935	35.1174	53.0266	0.594421	5.81838	7.91762e-21	1.11262e-19	1.50987
Asph	4.49175	4.85659	3.78126	3.91121	1.51469	3.11433	1.03919	4.00481	3.30578e-17	3.84973e-16	2.05507
Aspn	2.29781	3.64395	2.09991	3.86019	0.877417	2.92136	1.73056	2.23928	1.90901e-12	1.71132e-11	3.31856
Asprv1	0.700127	1.18814	35.4913	32.3097	46.156	28.8022	-0.680217	5.80593	4.2153e-28	7.64394e-27	0.624071
Ass1	5.32861	5.61589	5.8629	6.65898	7.47397	14.7762	0.982758	4.23146	5.03798e-18	6.14777e-17	1.97624
Atf3	5.88233	3.53255	110.395	62.1052	28.32	29.311	-0.829839	7.36286	7.24829e-113	1.46443e-110	0.562592
Athl1	13.9669	13.0255	12.1076	11.2744	7.38621	11.8797	0.68535	4.87657	1.00524e-14	1.03253e-13	1.60809
Atp1a2	32.5127	35.0733	19.6405	26.0934	6.02806	16.9593	1.49207	6.23341	7.46486e-141	6.34395e-139	2.81292
Atp2b4	9.56892	10.9392	12.2949	12.0471	10.9992	5.39572	-1.02735	6.03264	7.42029e-71	3.09772e-69	0.49061
Atp5j2	75.1019	58.3558	82.6252	76.7922	67.1782	100.848	0.585978	5.35535	4.02029e-15	4.2102e-14	1.50106
Atp6v0a4	1.88644	2.35185	6.10254	3.10052	2.43935	1.58583	-0.976168	3.8591	1.27108e-14	3.19876e-13	0.508328
Atp8a1	29.5798	35.4982	30.6936	31.8744	15.7428	26.8029	0.767649	7.48186	5.05981e-103	3.04385e-101	1.70249
Avpi1	24.349	23.6433	59.212	42.03	54.1707	32.1985	-0.750337	5.35715	4.36446e-25	7.26821e-24	0.594465
B2m	445.762	499.065	487.352	682.01	547.824	1094.4	0.998348	9.51137	0	0	1.99771
B3gnt9-ps	19.9849	18.5747	11.5882	11.7647	12.7187	19.5918	0.623134	5.2644	7.55132e-16	8.20077e-15	1.54022
B4galt4	25.2751	28.0268	24.4293	24.6962	11.0963	18.6715	0.75054	5.13625	2.36807e-20	3.25093e-19	1.68242
B930041F14Rik	3.72474	1.96476	2.62152	3.04281	5.37043	2.1309	-1.33172	2.93671	1.07878e-14	1.10541e-13	0.397295
Bak1	20.7414	21.0079	21.6888	23.4791	37.6692	60.4368	0.681971	6.65334	4.67199e-47	1.34845e-45	1.60433
Batf2	6.51905	6.45782	4.77053	17.2141	48.7882	92.1174	1.8497	4.00975	4.56122e-41	3.21326e-39	3.60425
Batf	6.15774	4.52856	38.0034	26.1068	45.6369	29.3605	-0.636137	5.04886	2.95724e-15	3.11981e-14	0.643434
BC017612	33.9063	30.2042	24.9988	20.4293	16.9561	28.2329	0.735224	4.45441	1.00085e-12	9.14819e-12	1.66466
BC028528	64.2624	58.8938	50.0904	48.3715	18.6948	41.5459	1.15115	3.80856	4.6447e-18	5.67433e-17	2.2209
Bcar1	36.4801	30.8591	76.0795	61.4104	56.0838	31.3304	-0.839959	7.07449	1.6041e-100	9.38618e-99	0.558659
Bcar3	20.9297	23.1137	40.4997	33.7953	25.5921	16.2666	-0.653691	6.07476	1.61717e-31	3.23073e-30	0.635652
Bcl2l11	9.5769	9.68186	14.3384	12.5702	21.7874	12.4316	-0.809385	6.38605	1.23928e-58	4.3085e-57	0.570625
Bcl3	14.5489	16.0756	199.709	121.314	121.855	62.6478	-0.719123	8.15865	3.58192e-146	9.58879e-144	0.607467
Bdkrb1	3.70975	4.84552	26.0452	19.9469	14.0283	5.33973	-1.39229	3.62377	1.33787e-24	2.18715e-23	0.380961
Bdkrb2	3.134	2.74402	6.60965	4.68386	9.84432	2.47008	-1.99221	3.27395	1.8326e-35	4.13126e-34	0.251354
Bhlhe40	16.6052	18.3124	117.503	89.7092	117.208	70.8221	-0.72678	8.1542	1.16764e-157	1.08722e-155	0.604251
Bhlhe41	4.63099	3.99749	8.46539	8.15246	8.82008	3.86058	-1.19054	3.10877	1.63244e-13	1.5812e-12	0.43814
Birc2	9.63696	11.367	33.7838	28.0022	24.8918	14.733	-0.756489	5.91857	8.23356e-37	1.91455e-35	0.591935
Birc3	15.318	16.5192	147.964	98.0424	80.075	38.5357	-0.593752	8.39744	1.58117e-117	3.35271e-115	0.662618
Bmf	9.00411	10.0723	14.8832	12.4268	24.5641	11.2582	-1.12543	6.31569	7.6129e-107	4.73948e-105	0.458365
Bmp3	13.9861	12.3108	4.10328	5.67641	3.20007	7.38887	1.20645	4.10236	1.98907e-23	3.12301e-22	2.30769
Bmp5	16.198	16.2361	13.6874	15.4441	5.88576	12.6498	1.10331	4.60574	5.15009e-28	9.32327e-27	2.14847
Bpgm	32.4045	33.787	23.5614	36.3107	16.6849	27.3609	0.623862	5.98899	3.83677e-24	1.5832e-22	1.541
Bpifa1	92.3763	83.0285	105.696	62.6404	64.008	40.5683	-0.754673	6.49214	6.41756e-52	5.75057e-50	0.592681
Bst1	4.11934	5.28761	14.6012	17.9943	26.16	41.7168	0.67318	6.34407	2.21934e-37	5.25187e-36	1.59458
Bst2	120.615	94.5849	86.6364	113.527	109.133	300.991	1.46353	7.36633	1.50492395723244e-320	3.19103660876423e-318	2.75783
Btbd2	27.0454	24.139	16.1632	14.7364	13.18	19.795	0.586673	5.67151	1.61541e-18	2.02432e-17	1.50178
Btg1	15.6741	17.5438	68.6441	55.6192	71.7491	42.6065	-0.751859	8.12139	6.31582e-165	6.17624e-163	0.593838
Btg2	53.4632	66.8351	188.301	129.807	64.6775	42.4139	-0.608689	7.33429	1.38873e-63	5.27324e-62	0.655792
Bzw2	7.53078	6.73456	8.14341	10.0089	16.3622	9.87647	-0.727996	4.57826	1.8681e-14	1.89607e-13	0.603742
C1qa	37.7187	40.0012	41.0423	38.0908	29.6155	75.7999	1.35557	5.90019	2.28498e-95	1.27104e-93	2.55899
C1qb	38.8527	38.0364	45.9817	63.4052	44.4383	99.1432	1.15755	6.3092	1.58387e-100	9.29321e-99	2.23078
C1qc	34.5343	32.7029	30.4299	33.517	27.4709	61.3771	1.15953	5.60725	1.30058e-59	4.57359e-58	2.23384
C1qtnf6	16.8765	14.842	12.0412	17.5112	9.73363	17.8389	0.873711	5.10984	5.37728e-26	9.19073e-25	1.83237
C1ra	27.517	24.9998	30.7931	35.6433	39.8783	68.8124	0.787012	7.27061	1.46456e-93	8.02177e-92	1.7255
C1rb	12.6799	12.0746	15.2062	16.5103	19.2055	33.6532	0.809079	5.88095	9.67993e-38	2.31885e-36	1.75209
C1s	32.9412	39.0111	32.5432	37.1556	42.0733	67.3381	0.678475	7.36834	2.11855e-75	9.39355e-74	1.60045
C2cd4b	4.86543	5.93825	48.228	17.3457	5.33671	7.06933	-1.47487	5.36096	9.02657e-83	1.2718e-80	0.359765
C3	281.27	230.735	307.189	340.684	336.319	515.84	0.617091	11.1272	0	0	1.53378
C920021L13Rik	18.1353	16.3377	10.6856	14.9597	4.87473	11.5871	1.24816	3.89029	1.25614e-21	1.82914e-20	2.37538
Cadps2	7.10054	7.7847	7.37459	6.52809	3.17928	5.64862	0.828811	4.49743	4.14342e-16	4.55989e-15	1.77622
Calcrl	123.143	193.362	59.9553	108.555	75.3465	151.384	0.856448	8.69057	1.39689e-271	6.64796e-269	1.81057
Calm2	124.798	137.853	198.006	226.087	231.407	135.687	-0.770117	7.76097	3.53587e-135	2.92371e-133	0.58637
Calm3	185.059	180.762	132.035	133.603	95.1023	167.355	0.815331	8.22088	1.39603e-191	1.69871e-189	1.7597
Calr	204.304	214.723	217.366	231.997	184.636	340.592	0.883343	9.04056	0	0	1.84464
Camk2n1	24.1458	27.5767	29.7706	23.8821	24.4043	13.7479	-0.827802	6.06269	2.63666e-49	7.87542e-48	0.563387
Camp	0.782881	1.72836	1.75539	18.6149	19.682	2.85106	3.39362	2.7472	2.82028e-38	1.86994e-36	10.5094
Camta1	1.07742	1.23583	1.47503	1.69117	2.20827	1.17294	-0.912118	3.78738	4.47e-13	4.19866e-12	0.531404
Cap2	2.743	3.62228	1.92285	2.24349	0.767254	2.53253	1.71932	2.67368	1.8587e-16	2.08626e-15	3.29282
Capn1	30.6159	28.2648	31.0067	33.5208	31.4043	50.5625	0.687051	7.02559	2.9003e-61	1.0654e-59	1.60999
Capn5	9.32059	8.77638	5.84504	7.51653	8.30226	13.893	0.742627	5.65187	8.44689e-28	1.52528e-26	1.67322
Car3	27.0861	40.8841	17.4673	15.5615	3.59436	15.8222	2.13617	3.98634	9.73342e-54	3.15357e-52	4.39594
Car8	10.557	12.3279	7.26508	8.99069	5.80013	12.4089	1.09699	5.75842	5.09663e-60	1.80114e-58	2.13908
Carns1	3.64763	3.58498	11.005	6.45851	3.25954	1.78893	-0.768637	5.06797	1.3729e-20	4.85184e-19	0.586972
Casc4	13.6976	13.8486	7.82363	13.9426	6.56382	7.79675	0.833386	5.56367	2.80357e-30	1.49729e-28	1.78186
Casp7	11.4587	12.3627	11.2647	12.9848	14.5428	25.6374	0.817769	5.60271	4.38667e-32	8.88788e-31	1.76268
Cbr2	2456.14	2203.25	2654.49	1713.66	849.277	624.783	-0.63135	11.0844	0	0	0.645572
Cbx1	24.2468	27.2057	19.0756	23.3732	17.4726	26.7646	0.615014	4.84872	5.28606e-12	4.6075e-11	1.53157
Ccdc56	65.0856	57.1388	41.8355	43.4891	48.6139	73.8644	0.603373	5.49007	2.60854e-17	3.0661e-16	1.51926
Ccdc80	7.70897	13.2478	13.3904	8.30819	7.87431	11.6078	-0.688406	5.26468	3.45042e-19	1.13161e-17	0.620539
Cckar	26.9118	31.1255	11.7714	11.5174	8.38126	17.336	1.04823	5.28815	2.28553e-40	5.75169e-39	2.068
Ccl17	4.11157	4.17122	100.075	61.5004	61.0066	11.5693	-0.702229	5.33313	1.23108e-20	4.36502e-19	0.614622
Ccl20	0.0379533	0.265968	107.048	44.7706	6.35319	0.348477	-1.25738	5.8537	2.21171e-86	3.31231e-84	0.418302
Ccl2	0.241785	0.193497	136.358	111.186	63.6797	39.6758	-0.682409	5.34361	7.85177e-21	1.10409e-19	0.623124
Ccl22	5.17732	4.81494	50.9477	34.802	47.3289	18.3958	-1.36309	5.82489	9.75216e-104	5.9333e-102	0.38875
Ccl4	0.419847	0.496971	34.7659	39.9992	99.2657	155.959	0.651726	6.43027	2.91913e-37	6.89263e-36	1.57105
Ccnl1	21.6585	22.6998	65.7287	54.6249	44.7606	28.3119	-0.660735	6.25672	2.80098e-36	6.46398e-35	0.632556
Ccr2	3.07064	3.97421	4.5546	7.83971	10.8414	13.6473	0.783089	4.52093	5.7333e-14	1.38115e-12	1.72081
Ccrn4l	4.07315	5.18326	59.2025	45.2387	16.8917	8.82854	-0.935824	5.25286	2.52868e-35	5.67654e-34	0.522744
Cd14	18.6942	22.5401	969.183	679.013	695.958	231.821	-1.58597	9.35967	0	0	0.333102
Cd177	2.19244	1.76197	19.6348	37.8739	43.8513	23.8871	0.947659	6.34086	4.3007e-66	4.79707e-64	1.92874
Cd180	2.27538	1.96548	1.2475	2.73986	2.68254	6.32019	1.23508	3.44936	3.979e-16	4.38345e-15	2.35394
Cd19	15.7635	13.0198	7.16608	6.26115	2.13862	5.67543	1.40637	3.31892	2.94788e-18	3.63662e-17	2.65069
Cd1d1	5.87558	5.6752	3.84995	3.48409	2.42316	6.97655	1.52358	3.18767	3.98609e-19	5.15495e-18	2.87503
Cd248	14.3464	12.1109	7.70432	9.28712	4.4677	12.0863	1.43499	4.47608	3.72473e-40	9.32968e-39	2.70381
Cd274	4.76198	4.68259	17.8349	39.1448	142.663	221.71	1.13399	6.75987	9.08723e-123	2.02721e-120	2.19465
Cd302	10.7514	11.5601	29.0482	24.2652	48.1604	27.5664	-0.804762	5.52967	5.42828e-32	1.09672e-30	0.572457
Cd33	1.94129	2.67041	35.5515	36.6958	26.2168	13.7106	-0.935012	5.63196	2.63504e-45	7.32883e-44	0.523038
Cd44	15.4592	20.1006	56.2834	59.7665	99.3187	49.083	-1.01682	8.65845	0	0	0.494205
Cd63	66.3625	62.8008	113.508	109.3	337.578	222.141	-0.603723	8.00682	1.14682e-98	6.60226e-97	0.658053
Cd68	15.3921	11.647	22.7634	24.8495	44.5611	76.4737	0.779048	5.97116	1.96475e-37	4.67004e-36	1.716
Cd74	819.24	743.777	821.629	788.548	688.131	1129.85	0.715372	10.3662	0	0	1.64191
Cd83	5.91718	5.21482	65.7	31.9926	15.179	7.54086	-1.03804	6.64904	3.5573e-108	6.74187e-106	0.486988
Cdc42ep3	14.1717	19.8851	7.93409	13.5684	15.5345	15.9531	0.773708	4.44764	4.47881e-13	1.00019e-11	1.70966
Cdc42ep4	82.6178	89.116	145.19	119.387	182.239	104.75	-0.798862	8.82131	4.69296e-301	9.13676e-299	0.574802
Cdh11	21.3358	20.5131	7.32954	11.8245	5.51061	11.3226	0.689803	5.37609	2.95113e-19	9.69347e-18	1.61306
Cdk14	16.9436	21.3507	17.4942	17.5994	7.25893	12.2627	0.756291	5.62228	3.86966e-28	7.03502e-27	1.68914
Cdk19	11.5635	12.0915	7.33929	8.61809	6.79905	14.3695	1.07942	5.99618	2.15927e-68	8.64352e-67	2.11318
Cdk5r1	0.776395	1.03652	1.67161	1.13303	6.17353	1.36045	-2.18007	3.85764	4.02285e-61	1.47019e-59	0.220666
Cdkn1a	83.1843	136.143	435.25	275.633	189.471	122.637	-0.659085	9.38646	3.63733e-285	1.99736e-282	0.63328
Cdkn1c	39.7004	38.5089	43.9541	39.8842	18.3272	42.3511	1.20819	5.94091	1.51086e-80	7.08022e-79	2.31048
Cdo1	71.7252	70.1684	67.3992	63.3035	66.4174	105.853	0.672372	7.07722	6.82937e-61	2.48315e-59	1.59369
Cdon	5.22798	5.70814	1.90687	1.80654	1.45977	3.06609	1.06996	4.08293	4.23865e-19	5.46508e-18	2.09937
Ceacam1	15.6628	18.0831	37.358	30.8459	32.8816	21.1881	-0.633963	6.62415	9.3264e-43	2.44772e-41	0.644404
Ceacam2	5.10688	6.19458	13.2153	10.5172	13.1872	7.0799	-0.897102	5.22949	4.30543e-32	8.73154e-31	0.536964
Cebpb	167.741	169.134	657.167	376.623	550.858	321.022	-0.803127	9.55393	0	0	0.573105
Cebpd	84.5498	84.2295	508.233	296.503	361.779	120.855	-0.777434	9.7816	0	0	0.583403
Celsr3	0.156913	0.116146	1.31951	1.39192	1.021	0.359377	-1.50423	2.91735	5.63972e-18	6.86252e-17	0.352518
Cenpj	1.91659	2.05555	1.13154	1.61552	2.12515	3.96079	0.897523	3.77667	9.91558e-12	8.49408e-11	1.86287
Cfb	18.5583	15.9298	45.532	57.6562	93.5213	159.106	0.766601	8.47856	3.7405e-203	4.74003e-201	1.70126
Cfd	60.3693	54.4306	53.6583	33.7255	20.2118	29.9042	-0.669782	5.29285	1.96786e-18	6.22507e-17	0.628602
Ch25h	4.50246	3.49456	105.832	71.9947	103.727	28.7987	-1.84846	6.39439	1.54549e-262	2.54601e-260	0.277689
Chd2	11.8531	11.3506	18.3167	14.8003	19.0303	11.4948	-0.727262	7.07422	1.20334e-75	5.39136e-74	0.604049
Chi3l3	34.2114	31.4767	34.7057	51.9587	98.3362	58.0216	-0.761068	6.86997	4.88357e-72	2.07513e-70	0.590059
Chi3l4	3.08753	2.30604	4.04549	4.79572	11.6726	5.89099	-0.985759	3.67656	5.03544e-14	4.99255e-13	0.50496
Chst11	6.6598	6.88627	8.79505	8.23716	15.7896	9.14196	-0.788285	6.06214	8.01782e-45	2.20706e-43	0.579032
Chst15	20.4674	21.7923	34.4018	31.9531	34.7864	16.4319	-1.08192	6.71422	9.88279e-130	7.72444e-128	0.472401
Chst2	12.0793	13.4293	7.43052	9.55597	4.73029	7.24159	0.614212	5.25575	2.27506e-15	2.418e-14	1.53072
Chst3	11.7757	11.1003	10.4139	9.25392	3.18332	5.29996	0.735159	4.73442	3.98404e-15	4.17428e-14	1.66458
Ciapin1	5.3414	5.43586	7.24296	5.80133	12.2216	8.02059	-0.607514	5.41956	9.55277e-18	1.14612e-16	0.656327
Ciita	6.97626	6.62458	5.72022	12.5533	18.7701	46.2727	1.13365	5.67794	2.17094e-56	2.16246e-54	2.19413
Cirbp	38.9086	41.8564	76.9958	66.9702	64.826	31.3301	-1.04884	5.86081	1.35065e-65	5.22119e-64	0.483357
Cish	37.7316	29.5376	190.158	109.243	74.9303	38.5922	-0.799627	8.28924	1.41825e-197	5.14801e-195	0.574498
Ckb	73.1917	62.911	33.8848	34.5131	13.8609	38.4701	1.47228	5.34452	2.45896e-75	1.08804e-73	2.77461
Clca3	2.00868	1.76607	4.05655	5.04867	1.77502	4.22387	1.24917	3.19975	5.00898e-14	4.96861e-13	2.37704
Cldn1	2.09809	2.74357	2.24637	2.93416	7.96281	2.55983	-1.63608	4.00939	4.45415e-42	1.15345e-40	0.32173
Cldn4	4.70559	4.08436	51.7364	32.8653	18.2211	6.10424	-0.654524	6.22032	6.94533e-33	3.99842e-31	0.635285
Clec11a	11.9955	8.91446	6.18149	7.32888	1.34712	4.50064	1.73653	2.59664	4.3265e-16	4.75648e-15	3.33232
Clec1a	38.6202	45.5444	23.2699	33.6832	20.2751	32.4278	0.677441	6.46362	5.99021e-41	1.51998e-39	1.5993
Clec4n	2.11572	2.1213	14.3681	13.0647	14.1571	27.6841	0.967144	4.75229	9.96347e-25	1.63383e-23	1.95497
Clic3	201.421	143.074	186.259	153.411	93.5258	146.531	0.647699	6.61741	1.04224e-41	2.68924e-40	1.56667
Clic5	169.703	185.089	132.792	152.457	85.7076	156.206	0.865943	9.51636	0	0	1.82253
Clstn2	5.66345	5.58036	5.14604	5.64599	3.59067	1.85384	-0.952896	3.51525	6.69668e-12	5.80632e-11	0.516594
Cmklr1	96.5267	80.0659	52.9815	60.2329	57.5389	104.636	0.862734	7.89432	1.30734e-170	1.31446e-168	1.81848
Cmpk2	11.6116	11.8217	6.42162	13.9226	17.7632	46.3788	1.11602	5.08302	8.39798e-37	5.27422e-35	2.16749
Cnp	23.5034	21.2927	17.1864	16.3267	13.8336	22.7491	0.717471	5.5798	6.36002e-25	1.05423e-23	1.6443
Cnpy3	38.5991	36.9844	31.0332	31.2236	30.9007	49.3289	0.674706	6.28579	4.07657e-36	9.35733e-35	1.59627
Cntfr	3.07414	3.20663	3.27347	2.80321	14.1767	2.72263	-2.37836	3.96764	9.74638e-75	4.28601e-73	0.192328
Col13a1	12.4286	12.5318	11.1873	10.6508	18.0734	8.31033	-1.12058	5.19874	2.2008e-47	6.38649e-46	0.45991
Col1a1	216.087	203.724	183.156	233.519	78.42	205.933	1.39286	9.45173	0	0	2.62599
Col1a2	135.537	143.591	120.385	164.541	53.1448	125.431	1.23886	8.90465	0	0	2.36012
Col20a1	1.3354	1.4975	3.19554	3.04197	2.62318	1.03462	-1.34026	2.86777	2.31964e-14	2.34327e-13	0.39495
Col3a1	168.84	179.784	122.882	182.551	59.3452	119.849	1.01399	9.0131	0	0	2.01949
Col5a1	20.9322	20.1582	19.3934	23.6405	11.0663	17.0877	0.626732	6.91887	6.03483e-48	1.75839e-46	1.54406
Col5a2	18.4125	18.758	14.4888	18.0484	11.4004	19.1058	0.744852	6.69551	3.8751e-57	1.30898e-55	1.6758
Col6a3	46.1475	39.1806	25.4012	31.2307	6.57635	16.4223	1.32018	7.027	9.2195e-210	1.21132e-207	2.49698
Col7a1	1.09088	1.29924	2.38734	2.14088	1.86648	0.821835	-1.18236	3.56587	6.17359e-18	7.4951e-17	0.440631
Col8a1	1.87777	2.77632	2.22131	3.2303	3.47162	8.98104	1.37079	5.05883	5.6598e-55	1.86477e-53	2.58612
Copz2	20.9197	22.4114	11.8865	14.4959	9.18	17.9569	0.967169	3.70507	9.8083e-13	8.97669e-12	1.955
Coro7	16.0615	13.6965	11.4055	13.9605	10.9913	17.1335	0.64032	5.64968	2.12719e-21	3.0698e-20	1.55867
Cox7b	19.6888	15.2613	17.0078	21.9861	13.4354	23.5235	0.807622	4.25093	3.02967e-13	2.88114e-12	1.75032
Cpne8	5.35198	5.58499	10.0942	10.7295	9.9156	3.61867	-1.4535	4.41698	5.97378e-45	1.65077e-43	0.365134
Crispld2	91.8297	93.7835	140.363	129.492	154.842	70.4002	-1.13712	8.80888	0	0	0.454665
Crtc2	26.6156	25.3556	58.9063	38.8231	45.2038	35.2448	-0.601453	6.96856	6.79468e-46	5.47048e-44	0.65909
Cry2	26.6745	25.1079	39.8626	35.7742	30.9612	19.1399	-0.693809	6.60989	1.86479e-50	5.70519e-49	0.61822
Cryab	156.001	137.411	109.141	111.217	71.9451	119.874	0.736483	6.86682	9.00446e-63	3.3891e-61	1.66611
Csf1	13.901	14.1682	146.888	110.37	128.065	79.1304	-0.69456	8.71973	2.91206e-212	3.89779e-210	0.617898
Csf2	1.14378	1.20577	16.1228	13.1299	7.81267	2.27766	-1.77405	2.29286	7.35666e-16	7.99747e-15	0.292388
Csf3	0.0424396	0.563217	137.602	124.663	78.5431	8.55455	-3.19765	5.76046	0	0	0.108996
Cspg4	9.99957	8.91714	11.7604	10.1673	5.50164	10.7034	0.959977	6.0764	1.57358e-58	5.45303e-57	1.94528
Csrp1	350.73	341.527	322.898	319.941	177.63	301.073	0.761221	8.76631	3.18379e-244	4.90533e-242	1.69492
Ctla2a	86.4941	66.1767	100.35	70.6124	138.562	60.8083	-1.1881	7.0346	1.64376e-194	2.01158e-192	0.43888
Ctla2b	16.0357	14.8853	13.66	11.9511	15.9653	8.43824	-0.91924	3.75774	6.76671e-13	6.26257e-12	0.528788
Ctps	7.82293	8.38241	56.8864	46.01	68.618	33.437	-1.03706	7.05413	1.63675e-150	1.49797e-148	0.487319
Ctsa	98.3562	87.1251	80.3909	69.7721	48.636	81.5653	0.745899	7.94076	2.2894e-133	1.84323e-131	1.67702
Ctso	12.5018	13.6416	9.12773	10.0212	5.23698	8.40715	0.68259	4.59359	2.8359e-12	2.50759e-11	1.60502
Ctss	33.9016	31.039	32.2271	55.1681	54.8536	126.392	0.775416	5.9332	4.82549e-34	2.85477e-32	1.71168
Ctsw	6.20901	5.18484	4.55787	5.64286	2.74251	7.63166	1.47384	2.74681	1.38902e-13	1.35092e-12	2.77761
Cxcl1	0.34975	0.406058	480.847	342.529	67.7701	7.09156	-3.25461	5.01851	2.72488e-236	4.0525e-234	0.104777
Cxcl12	59.2754	60.062	22.6684	30.8525	24.7134	60.5798	1.29348	7.98169	0	0	2.45119
Cxcl15	222.141	279.459	203.491	240.037	80.4051	157.244	0.967602	8.03095	3.89822e-233	5.67921e-231	1.95559
Cxcl2	0.179944	0.161657	682.224	472.812	219.516	104.957	-1.06446	7.40095	4.63151e-201	5.83462e-199	0.478152
Cxcl3	0.138268	0.153957	74.8267	63.5514	37.9023	9.9638	-1.92649	4.50556	3.53988e-77	1.60955e-75	0.263068
Cxcl5	0.101192	0.521598	28.0622	27.0314	12.0673	2.89714	-2.05618	3.53126	1.05341e-44	2.89228e-43	0.240452
Cxcl9	0.038781	0.468247	3.39785	12.4265	83.373	150.183	1.86962	4.61955	8.2568e-63	8.75384e-61	3.65435
Cxcr7	22.137	22.6155	41.0131	38.2847	62.7192	24.4587	-1.35843	6.74269	1.36738e-207	1.76408e-205	0.390008
Cxx1a	112.295	107.216	58.6282	72.1793	45.3713	98.4751	1.11785	6.57517	6.44789e-113	4.24886e-111	2.17023
Cxx1b	111.787	100.733	60.0738	61.2243	47.4657	97.2748	1.03506	6.53086	7.14216e-95	3.94218e-93	2.04919
Cxx1c	43.0997	39.279	22.742	26.8181	14.5476	31.1712	1.09889	4.49906	4.63915e-26	7.94817e-25	2.1419
Cyb5r1	17.4808	13.8861	11.3428	12.1106	13.2678	20.9989	0.662141	4.8346	1.79416e-13	1.7299e-12	1.58243
Cybb	9.03816	10.1097	12.8622	22.2402	20.8065	37.8142	0.789925	6.42827	6.48302e-50	5.5984e-48	1.72898
Cyp1a1	29.8541	25.8287	26.7262	25.8632	2.94669	0.478932	-2.61215	2.0916	2.83094e-24	4.57911e-23	0.163555
Cyp26b1	19.0948	36.5344	21.6142	12.4026	4.3361	17.127	-0.801232	6.28786	6.93934e-51	6.14103e-49	0.573859
Cyp2e1	5.66938	6.66366	7.28459	6.14503	0.858668	4.83213	2.48477	2.40833	3.05854e-23	4.77417e-22	5.59746
Cyp2f2	1309.64	1455.63	1256.54	789.052	231.601	306.118	-0.671263	10.8214	0	0	0.627957
Cyp2s1	81.9076	94.377	58.4037	50.5593	21.3289	33.032	0.630964	6.18767	6.74668e-30	1.28433e-28	1.5486
Cyp4f39	3.55	4.09011	3.74678	2.69233	1.24688	3.38018	1.43606	2.6679	1.44014e-12	1.30025e-11	2.70582
D10Wsu102e	6.21795	5.65009	13.7275	11.0852	10.7788	6.53978	-0.720643	4.88656	3.16551e-17	3.6904e-16	0.606827
D14Ertd668e	3.35809	2.9475	2.25131	3.80993	6.24249	13.2951	1.09026	4.76859	9.39722e-31	1.83289e-29	2.12912
D8Ertd82e	4.79394	4.71161	6.9292	5.72481	6.26088	2.75739	-1.18247	4.36789	3.38352e-30	6.48135e-29	0.440597
Dab2	11.1951	11.7021	20.0441	21.8481	23.409	14.026	-0.73887	6.36208	2.63398e-48	7.7273e-47	0.599208
Dact3	16.8735	17.7042	5.27863	7.20204	5.34231	11.6663	1.12631	4.64453	7.31262e-30	1.38836e-28	2.18299
Dagla	5.95958	5.11031	2.60583	2.68147	2.96594	4.83369	0.704311	4.49416	3.39925e-12	2.99458e-11	1.62937
Darc	0.0972873	0.712446	3.30464	2.41962	9.83508	2.42968	-2.01342	2.73026	2.42235e-25	4.0656e-24	0.247685
Dbn1	9.94088	7.57449	16.331	16.3138	51.954	16.0453	-1.69489	6.60876	5.54495e-293	1.05089e-290	0.308879
Dbp	18.5397	6.10794	15.8428	30.457	34.3723	16.3942	0.942676	5.3341	1.97713e-32	1.12912e-30	1.92209
Ddit4	67.6484	53.0383	103.803	88.2673	90.1892	50.3692	-0.84034	6.84296	5.83605e-86	2.90662e-84	0.558512
Ddn	0.00813864	0.00592183	2.12804	1.26529	4.10078	0.419669	-3.28058	2.9463	1.39022e-57	4.72587e-56	0.102908
Ddost	69.5713	67.1943	58.9958	61.4568	55.415	88.5215	0.675707	7.27157	4.45811e-70	1.83606e-68	1.59738
Ddx3y	10.2073	16.0225	18.1438	16.5889	15.5008	9.5035	-0.705686	5.82033	3.05445e-30	5.86147e-29	0.613151
Ddx60	0.906589	1.07615	1.25683	2.11965	1.34755	2.96238	1.13547	3.74681	6.29819e-17	7.25953e-16	2.1969
Decr1	6.66978	8.07632	4.73229	5.70899	4.13899	7.31936	0.821943	4.12575	1.98639e-12	1.77994e-11	1.76779
Dennd3	48.4575	44.6174	97.6606	74.8491	78.5633	45.1185	-0.80011	8.31349	5.46485e-213	7.36071e-211	0.574305
Dennd4a	4.43356	5.32761	26.7005	23.1056	13.3408	5.25991	-1.34255	6.26152	8.36531e-136	6.94386e-134	0.394323
Deptor	14.0282	14.6216	21.1006	19.0258	19.1943	9.1041	-1.07584	5.48843	1.74752e-53	5.62779e-52	0.474394
Dgat2	6.62474	7.57635	18.6595	13.5715	27.8087	13.2649	-1.06768	5.47442	3.41634e-52	1.07437e-50	0.477086
Dhrs1	27.6696	21.561	17.2756	20.8663	16.5329	28.2857	0.774495	5.08293	1.00079e-20	1.40176e-19	1.71059
Dhrs3	83.6459	95.9492	55.7705	45.6386	36.7429	56.4853	0.62033	6.35175	2.84235e-32	5.80283e-31	1.53723
Dhx40	8.07417	9.26614	12.8356	9.70659	13.7363	8.1789	-0.747834	5.31059	4.00853e-24	6.42564e-23	0.595497
Dhx58	3.79638	5.37461	4.09235	6.48351	8.49352	14.1942	0.740588	4.81249	3.18176e-16	3.53426e-15	1.67086
Dio2	0.226751	0.542931	1.72928	1.42789	14.9072	0.468	-4.98837	5.32811	0	0	0.031503
Disp2	6.78082	6.06193	2.16819	5.70042	2.93505	3.77454	1.39393	4.78169	6.60946e-44	5.05529e-42	2.62793
Dll1	18.5732	18.4531	86.7536	59.0267	28.3919	16.5328	-0.780043	6.22507	5.68288e-49	1.688e-47	0.58235
Dmpk	36.027	35.3654	26.5251	24.9163	8.5835	28.9145	1.75174	5.77533	5.63478e-134	4.571e-132	3.36764
Dmxl2	1.71482	1.54194	3.55635	3.00553	8.47973	3.03024	-1.48431	5.85701	8.60347e-124	6.31e-122	0.357421
Dnahc17	0.828535	0.848855	2.53109	2.03561	1.89857	1.1885	-0.675469	4.48597	7.00454e-12	6.06588e-11	0.626128
Dnajb5	14.8857	15.1102	29.6761	19.1034	17.2727	16.3439	-0.635349	5.77671	6.72611e-23	2.65279e-21	0.643785
Dnajc27	3.44902	3.65508	4.99941	2.78567	3.25417	2.69883	-0.843222	4.14615	1.8091e-13	4.15706e-12	0.557397
Dnm1	9.59025	8.98282	5.73785	6.68329	2.31424	7.28212	1.65273	4.26056	1.10789e-43	2.96212e-42	3.14427
Dnmt1	12.1367	10.5377	8.91144	9.77341	10.1467	15.7141	0.630964	6.28059	8.81858e-32	1.77332e-30	1.5486
Doc2b	0.207314	0.446525	4.98397	2.6267	4.2599	0.858165	-0.923402	3.95791	5.13455e-14	1.24532e-12	0.527264
Dock2	7.44573	6.20834	9.85291	9.3358	6.90351	11.2719	0.707204	5.87406	1.7532e-29	3.29934e-28	1.63264
Dpp4	16.2792	16.199	9.81117	11.8816	3.43267	8.27438	1.26887	5.00939	8.70067e-47	2.49777e-45	2.40972
Dpy19l1	4.94739	6.04572	3.02116	4.37095	3.31016	6.03107	0.865109	4.51202	1.73979e-17	2.05966e-16	1.82148
Dpysl2	82.2023	83.2917	44.224	47.4408	29.1638	48.9859	0.748144	7.47504	1.21924e-97	6.94447e-96	1.67963
Dusp16	13.4115	13.4906	40.1299	30.304	28.4013	14.219	-0.998045	6.71317	1.63161e-110	1.05886e-108	0.500678
Dusp2	6.55713	4.72767	19.4796	9.15813	15.9149	10.5665	-1.0883	4.46896	3.09874e-26	1.38834e-24	0.470315
Dusp3	58.6484	66.2717	49.8911	49.5778	28.9286	43.7621	0.597144	7.2865	5.47054e-56	1.83058e-54	1.51272
Dusp8	19.0414	18.8229	33.3137	20.7794	9.59402	8.89235	-0.680905	6.98468	4.15432e-59	4.23661e-57	0.623774
Dynll1	38.7045	36.7103	25.0858	24.6671	23.6693	39.6697	0.744904	6.03881	7.48101e-37	1.74145e-35	1.67586
Dysf	5.2244	5.40299	4.46625	5.09013	7.0813	10.717	0.597715	5.95819	2.64404e-23	4.13622e-22	1.51332
E030010A14Rik	10.7992	15.1573	82.1404	66.2514	48.6651	6.90678	-2.81609	5.97409	0	0	0.141994
E030019B13Rik	26.4019	28.3827	16.9561	20.8606	12.2047	19.3735	0.666458	5.20973	3.3033e-17	3.84894e-16	1.58717
E130012A19Rik	2.6714	3.71781	9.39787	6.69097	7.49095	3.3234	-1.17148	3.59359	5.23497e-18	6.38088e-17	0.443966
E130203B14Rik	10.742	10.1827	11.5803	13.5475	8.59498	13.3212	0.631946	4.94271	2.44687e-13	2.33938e-12	1.54965
E2f1	7.38768	6.35764	3.73673	3.90493	1.5363	5.41404	1.81459	3.17957	9.1127e-25	1.50237e-23	3.5176
Edn1	14.3243	18.0977	23.4971	29.9353	47.4047	26.7732	-0.824142	6.39789	3.15106e-61	1.15553e-59	0.564818
Efnb1	106.17	119.402	81.5126	74.7856	59.0609	90.7073	0.618989	7.96307	9.86185e-95	5.42934e-93	1.5358
Egfl6	15.5417	13.2265	13.3865	16.5871	7.86303	19.5913	1.31666	5.2768	2.08201e-59	7.30955e-58	2.49089
Egflam	26.134	26.1339	19.3881	21.7152	5.53303	11.5916	1.06665	5.40833	4.06894e-45	1.1273e-43	2.09457
Egfr	3.39131	4.13453	8.40627	6.61002	5.91875	2.9125	-1.02262	4.665	3.25125e-28	5.93089e-27	0.492221
Egln3	0.892158	0.851202	5.3019	3.9504	3.59317	1.2408	-1.53122	2.61478	4.79866e-15	5.00575e-14	0.345984
Egr1	15.8277	26.1173	457.913	257.056	70.1986	31.4222	-0.832981	10.0506	0	0	0.561368
Egr2	2.25642	2.52186	12.5229	8.52936	7.5462	3.37308	-1.16091	3.95582	2.84701e-22	4.27271e-21	0.44723
Ehd2	277.438	259.121	160.88	186.7	158.065	255.309	0.69171	9.34004	2.82857e-301	5.5575e-299	1.6152
Ehf	4.48622	4.4888	20.132	13.9266	9.67798	5.55651	-0.800284	5.01964	1.03549e-22	1.58287e-21	0.574236
Eid3	0.948109	1.61486	25.4	14.1759	6.89106	4.7723	-0.841025	4.6385	2.1434e-18	6.7604e-17	0.558247
Eif2ak4	4.80583	5.10132	6.76772	4.14772	4.85182	4.10158	-0.706081	4.78736	9.86874e-15	2.50117e-13	0.612983
Eif2c1	25.5022	25.0318	12.5027	14.3258	9.97111	15.2825	0.615982	6.51122	2.16999e-35	4.88158e-34	1.5326
Eif4e3	17.9306	20.5775	13.8918	17.3798	18.9214	31.1881	0.720857	6.01396	4.10851e-34	8.86081e-33	1.64816
Eif6	47.8309	38.6173	105.816	80.5375	114.396	73.6286	-0.63565	7.10075	3.86525e-59	1.35258e-57	0.643651
Elf3	8.5113	10.8498	63.71	32.792	27.4938	19.2376	-0.958065	6.53489	2.07361e-85	3.06265e-83	0.514747
Elk4	11.6847	13.1752	11.3913	9.18946	7.93407	4.24303	-0.902546	4.43411	2.44017e-19	3.19429e-18	0.534942
Ell	18.6216	17.2765	35.2457	29.1271	33.7742	19.7152	-0.776521	6.3249	6.68671e-52	2.09667e-50	0.583773
Eln	288.391	331.502	238.718	384.396	157.697	298.162	0.687281	10.2427	0	0	1.61025
Elovl6	1.80643	1.63607	8.67768	8.47728	7.17535	2.2233	-1.68962	4.72052	1.21979e-71	5.16266e-70	0.310009
Emilin2	5.58025	6.10709	19.9697	20.3772	43.0957	21.5179	-1.00192	6.92797	5.97244e-129	4.63427e-127	0.499333
Emr1	4.04649	4.33661	3.42195	4.64072	5.74898	11.1468	0.954889	4.82554	3.30068e-25	5.51814e-24	1.93843
Enc1	5.4034	6.18719	20.6884	17.4801	39.3992	19.9536	-0.981446	7.0851	8.19677e-138	6.83043e-136	0.506472
Enpep	20.9791	20.6384	17.5002	17.7759	6.56805	11.1799	0.767159	5.26248	7.28053e-23	1.12092e-21	1.70192
Enpp5	24.424	20.4065	18.4424	17.1147	9.39049	17.2132	0.873976	5.12046	2.51629e-26	4.35642e-25	1.83271
Epb4.9	5.04525	6.56139	2.55231	3.22237	1.43986	3.44492	1.25721	3.43921	2.00792e-16	2.25139e-15	2.39034
Epcam	16.4508	19.0617	28.3095	24.961	46.9181	27.0067	-0.796716	6.20874	1.79228e-50	5.4912e-49	0.575658
Eppk1	4.32528	4.49809	10.6986	6.53497	4.58217	3.2376	-0.711098	6.68744	1.07342e-52	9.74086e-51	0.610855
Eps8l1	19.3554	19.6325	15.3339	13.2996	9.84726	16.1145	0.710342	5.06984	1.1626e-17	1.38709e-16	1.63619
Epsti1	3.72624	5.02349	3.43341	4.41677	3.88949	8.43257	1.11535	3.58134	8.72704e-15	8.9855e-14	2.16648
Erap1	11.6967	14.5781	10.9096	14.3191	14.2264	26.757	0.911233	6.40877	8.75814e-69	3.55236e-67	1.88065
Erf	19.1065	19.5915	34.6844	21.0779	27.6044	24.5835	-0.718475	6.56615	1.43658e-49	1.22573e-47	0.60774
Ergic3	83.913	72.4421	64.7188	59.1606	36.0436	58.9364	0.709299	5.98169	2.06979e-32	4.24584e-31	1.63501
Ermp1	6.05199	6.19886	4.09382	5.18946	2.8009	4.86084	0.794921	4.41007	3.72111e-14	3.72216e-13	1.73498
Erp29	51.9716	47.7536	47.5846	46.8616	47.0917	71.5049	0.602486	6.23537	2.51553e-28	4.6045e-27	1.51833
Esf1	6.55362	9.53064	8.65551	10.3152	13.3097	8.06935	-0.721751	5.14148	2.61693e-20	3.58109e-19	0.606361
Espn	6.82161	4.95207	2.04893	1.80584	0.801004	2.51333	1.64556	2.3226	2.75735e-12	2.44216e-11	3.12869
Esyt1	40.713	37.9161	32.6366	38.3705	35.231	53.5897	0.605073	7.38627	2.15773e-61	7.93984e-60	1.52106
Etl4	11.0252	11.5117	9.21853	9.53719	5.23344	7.97471	0.607547	5.64527	2.67342e-19	3.49323e-18	1.52367
Etv5	33.0079	26.4639	11.4254	18.1192	15.465	31.6453	0.66515	5.85842	1.33859e-24	5.65428e-23	1.58573
Evc	7.99645	6.15838	3.79092	4.47721	1.23472	3.80462	1.62179	3.51847	5.04736e-26	8.63373e-25	3.07756
Evl	18.984	17.7862	15.2855	15.7628	11.7172	17.5827	0.585348	5.02982	2.35211e-12	2.09103e-11	1.5004
Exosc6	13.6949	11.1445	12.0827	7.04383	20.7835	11.0369	-0.912633	4.27775	6.61676e-18	8.02403e-17	0.531215
F13a1	4.36946	3.68885	6.25242	9.85875	11.32	7.29758	0.656762	5.00368	5.59623e-14	1.34965e-12	1.57654
F3	19.6801	21.726	88.6651	75.1648	74.9985	45.0199	-0.736231	6.77533	2.55227e-63	9.65714e-62	0.600305
Fads1	46.6826	44.9214	28.84	30.8137	20.915	33.0577	0.660378	6.57864	3.78746e-42	9.83179e-41	1.5805
Fads2	37.6772	32.9096	18.5285	21.1543	15.3304	23.4059	0.610261	4.90019	3.55709e-12	3.13106e-11	1.52654
Faim2	9.58089	10.2733	4.62616	3.54519	0.658908	1.87627	1.50666	2.59054	9.47969e-13	8.67965e-12	2.84152
Fam107a	5.23125	10.2277	41.3126	30.5758	7.80811	3.56206	-1.13158	4.10021	2.22073e-23	3.48164e-22	0.456415
Fam111a	5.13275	5.40286	4.99419	6.80426	6.38611	11.5952	0.860206	4.89029	5.40105e-22	7.98267e-21	1.8153
Fam114a1	11.6923	13.633	9.26561	11.1448	5.74397	12.2344	1.09039	4.78337	6.44329e-31	1.26364e-29	2.12931
Fam117a	21.8959	22.6895	15.0669	18.8916	15.8302	25.1165	0.665819	5.60271	3.54985e-22	5.30891e-21	1.58647
Fam132b	0.400251	0.360984	0.833611	0.721071	3.92388	1.17953	-1.73111	2.75774	2.48381e-20	3.40546e-19	0.30122
Fam134b	16.9093	21.2012	42.9032	39.6252	43.0757	20.8247	-1.04847	6.60423	4.24031e-113	2.81147e-111	0.483481
Fam174b	106.64	97.5433	45.4846	50.204	24.0797	50.1015	1.05692	6.68768	8.80545e-110	5.64603e-108	2.08049
Fam18a	3.33854	3.37703	4.16727	4.67894	4.35149	8.44533	0.956173	4.44936	6.73695e-20	9.0287e-19	1.94016
Fam198a	3.16373	3.57912	0.869235	0.760261	0.632709	1.93438	1.60815	2.29286	9.40036e-12	8.0721e-11	3.04861
Fam20a	7.40025	7.39626	2.91374	4.69203	1.50984	4.82441	1.67345	3.08727	1.46257e-20	2.02733e-19	3.18976
Fam38b	8.62558	8.75606	5.8145	6.46661	2.65194	5.06572	0.933484	5.4187	7.51201e-36	1.71511e-34	1.90988
Fam43a	28.5307	29.2125	54.0127	43.126	35.3912	20.1838	-0.810094	6.37367	3.02054e-58	1.03501e-56	0.570345
Fam46c	23.1398	22.3017	12.5246	19.6705	7.78445	19.008	0.65105	5.06797	2.74118e-14	6.73223e-13	1.57031
Fam55c	3.21852	2.64934	2.25447	2.60468	3.20386	5.61109	0.808178	4.8665	1.83523e-19	2.41272e-18	1.751
Fam55d	6.16811	5.8086	3.94664	3.55976	2.02056	4.6476	1.2005	3.46278	1.77605e-15	1.89516e-14	2.29819
Fanca	3.58569	3.63356	3.23305	3.49692	2.64664	5.12456	0.9527	4.18969	9.26888e-17	1.06208e-15	1.93549
Far1	9.62623	14.8285	10.2952	16.2321	9.3495	10.7538	0.65675	5.75807	1.67928e-22	6.51511e-21	1.57653
Fas	19.3306	25.2926	97.8658	77.4531	56.525	36.0926	-0.64709	6.06984	8.20225e-31	1.60566e-29	0.638567
Fbn1	29.7961	26.2353	21.0938	26.5561	22.9503	34.8493	0.602597	8.19209	3.78424e-105	2.33554e-103	1.51845
Fbrsl1	15.5671	15.129	22.9616	16.6994	19.424	12.1876	-0.672335	6.18565	8.64674e-36	1.96372e-34	0.62749
Fbxo32	3.09436	3.62462	4.06397	4.40449	4.18275	2.14606	-0.962303	4.40486	2.00693e-21	2.90016e-20	0.513237
Fbxw10	0.504265	0.281785	4.34279	2.61539	2.31269	0.409914	-2.48759	2.03881	8.05124e-22	1.18343e-20	0.178304
Fcgr1	1.08093	0.946257	1.43045	2.23787	4.7084	13.9356	1.56471	4.6679	8.47995e-53	2.70651e-51	2.95817
Fcgr4	1.93186	2.3422	10.8569	15.6376	26.7795	52.0481	0.958511	5.67151	1.73781e-44	4.75313e-43	1.9433
Fcrlb	0.279844	0.448993	1.05907	1.88152	14.2618	5.52842	-1.36601	3.59664	1.47152e-23	2.31721e-22	0.387963
Fdx1	23.3995	23.1157	40.7609	33.688	47.5174	30.8268	-0.624084	5.04217	1.18465e-14	1.21042e-13	0.648831
Ffar2	0.682903	0.726924	1.99252	1.93833	8.51383	4.14239	-1.03859	3.80329	1.17821e-16	1.34002e-15	0.486804
Fgd2	10.2017	9.48989	4.32416	4.44997	4.51305	10.1287	1.16563	4.3226	1.06139e-25	1.79689e-24	2.2433
Fgf18	8.1364	8.05435	1.93541	3.02718	2.21761	7.30675	1.71617	2.44936	4.59743e-14	4.57521e-13	3.28564
Fgf23	0.0167798	0.21243	15.301	17.0272	2.20957	0.204866	-3.39722	0.993296	1.5687e-16	1.77097e-15	0.0949147
Fgfr1	22.5312	20.0325	25.5541	23.9844	35.0637	20.2962	-0.788713	7.07285	1.13519e-88	5.80218e-87	0.57886
Fgfr3	48.9648	52.4623	57.9256	47.2912	17.2531	30.7387	0.833114	6.71352	2.03216e-71	8.53349e-70	1.78153
Fgfr4	17.3196	14.8817	4.64704	8.13068	2.0379	4.67284	0.806619	4.37609	1.95869e-13	4.48635e-12	1.74911
Figf	26.8824	27.8296	22.1264	29.8405	6.61989	24.144	1.86597	4.93671	1.79588e-83	8.72121e-82	3.64512
Fignl2	5.39605	6.30449	17.2593	11.038	5.76857	4.47014	-0.644768	5.85573	8.55958e-25	3.65163e-23	0.639596
Fjx1	7.62364	6.5701	10.9027	10.7183	14.7355	8.31628	-0.824982	4.76182	2.99567e-20	4.08632e-19	0.564489
Fkbp2	31.9225	31.9733	35.2466	35.5229	33.1438	57.8123	0.802358	4.91369	8.30479e-20	1.10538e-18	1.74395
Fkbp5	11.855	23.0108	122.468	90.0296	77.2792	35.6379	-1.11661	7.56995	2.27744e-248	3.61286e-246	0.461177
Flt3l	27.69	25.8759	11.8211	13.7392	10.5412	20.5327	0.961281	4.11091	3.39293e-16	3.75714e-15	1.94704
Fmnl2	6.47396	7.58674	17.8036	18.8298	32.124	17.0806	-0.911231	7.12099	6.59757e-122	4.77343e-120	0.531731
Fmo3	18.7226	22.446	20.2831	12.7979	7.74417	6.23645	-0.664149	5.01459	2.61116e-15	6.9123e-14	0.631061
Fndc4	2.28322	2.46871	2.09334	2.74368	12.3519	5.8266	-1.08345	4.30966	9.83899e-25	1.61589e-23	0.471899
Fos	8.38191	19.5191	154.612	102.786	28.4044	14.5304	-0.58898	8.03752	1.56624e-90	2.44836e-88	0.664813
Fosb	2.12018	1.69166	11.6625	5.02329	3.8344	1.42843	-1.21472	4.90545	8.01961e-43	5.94284e-41	0.430856
Fosl1	3.50598	4.38553	41.8528	30.0596	19.4653	4.94701	-1.97504	4.28343	2.77781e-69	1.1353e-67	0.254364
Fosl2	19.8392	22.667	179.792	137.429	67.0242	32.5897	-1.04023	8.13508	3.70008726564385e-318	7.76873223645681e-316	0.486251
Foxf2	27.9872	24.6677	9.82834	15.6042	12.5037	19.1632	0.66667	4.95035	7.56161e-14	1.79733e-12	1.5874
Foxp4	31.4657	31.251	65.4893	51.7823	56.0227	32.2128	-0.798333	7.42963	8.69931e-116	5.95221e-114	0.575013
Foxq1	7.68082	8.61513	13.3032	9.20513	11.3627	4.41962	-1.36162	4.39789	1.64484e-39	4.08295e-38	0.389146
Fpgs	12.8993	10.8559	13.6278	10.2583	18.9385	12.1155	-0.644288	5.10021	4.14102e-16	4.5596e-15	0.639809
Fpr1	1.99099	1.1004	26.9465	22.6534	37.8003	22.9873	-0.717384	5.29098	4.23633e-22	6.29163e-21	0.608199
Frat1	3.04169	2.29009	4.79063	3.25028	4.7947	2.23966	-1.09688	3.14252	4.84507e-12	4.23519e-11	0.467526
Ftl1	246.72	249.494	383.458	326.756	487.165	734.249	0.591848	9.24153	3.53702e-208	4.59084e-206	1.50718
Fuca2	12.0267	10.2645	10.8412	12.2663	11.2009	17.1651	0.615754	5.84168	1.37527e-22	2.08589e-21	1.53236
Furin	60.1024	57.2724	126.096	101.356	202.633	120.691	-0.747544	9.39647	0	0	0.595617
Fus	95.3455	81.6068	169.336	116.509	154.367	100.646	-0.617052	7.84408	3.14233e-92	1.6994e-90	0.652002
Fzd9	0.0923596	0.255107	0.615246	0.184401	0.977634	0.0232731	-5.13857	-0.0826528	3.63798e-12	3.19963e-11	0.0283881
G0s2	56.0524	33.4506	70.0902	50.1494	23.6909	39.8473	0.749864	4.78204	3.27532e-16	3.63254e-15	1.68163
Gadd45a	16.0569	13.3555	77.7491	52.32	43.5689	26.5028	-0.716986	5.38385	1.91714e-23	3.01228e-22	0.608367
Gadd45b	49.8151	51.2498	326.686	203.321	367.523	230.738	-0.68412	8.34855	1.07987e-150	3.00345e-148	0.622385
Gadd45g	39.5903	30.8713	217.687	143.567	125.136	70.6929	-0.600499	7.57129	1.37377e-68	1.60769e-66	0.659526
Galnt10	7.98771	7.67788	5.53694	5.44121	4.32136	6.88093	0.670861	4.75365	3.80503e-13	3.59456e-12	1.59202
Galnt2	39.7171	37.3627	30.3122	29.5418	24.8222	43.1044	0.796147	7.1663	4.34025e-89	2.22904e-87	1.73646
Galntl2	6.81493	7.90567	13.3845	10.4731	20.1894	6.45683	-1.64407	4.88032	4.17823e-76	1.87985e-74	0.319952
Gamt	10.0485	8.26514	3.20447	6.13754	1.63969	6.9339	2.07335	2.10877	3.25877e-15	3.42947e-14	4.20862
Gas1	22.9085	25.155	6.63907	10.389	8.38875	15.2316	0.860296	5.25286	6.57811e-28	1.18984e-26	1.81541
Gas5	5.91391	6.90953	12.2199	9.76968	14.6524	9.2738	-0.659691	4.89772	8.47207e-15	8.72717e-14	0.633014
Gata5	6.30894	5.84798	1.58851	2.77765	1.90696	4.52185	1.24435	3.46945	1.71729e-16	1.9326e-15	2.36911
Gatm	2.41987	3.16428	3.87385	2.04867	5.75445	13.6653	1.24717	4.57826	5.07585e-34	1.09141e-32	2.37375
Gbp10	2.61879	3.46317	7.67505	18.699	40.8208	82.3027	1.28438	5.61159	1.03145e-66	1.16261e-64	2.43578
Gbp1	0.26348	6.92209	1.0727	25.1733	5.03284	245.764	4.54778	5.36286	1.98922e-292	1.12108e-289	23.3894
Gbp11	0.567876	0.565842	0.889324	2.26427	6.88902	13.4593	0.96587	4.83331	6.31871e-26	1.07826e-24	1.95324
Gbp2	20.3414	20.4875	64.7142	148.329	526.249	694.439	1.1966	8.09821	0	0	2.29198
Gbp3	9.63868	10.3522	17.552	42.7904	74.7354	140.459	1.28546	6.38686	3.21188e-113	6.55101e-111	2.4376
Gbp4	9.68784	9.58807	11.5117	31.8386	74.1999	137.026	1.46749	6.70027	1.16812e-189	3.90882e-187	2.7654
Gbp5	3.99271	3.74697	36.4007	65.6053	150.759	219.804	0.849785	7.31706	1.95374e-104	3.45795e-102	1.80223
Gbp6	3.81707	5.16056	12.2753	27.774	66.8941	107.831	1.17782	6.49993	2.58371e-110	5.03024e-108	2.26234
Gbp7	11.8564	15.3918	13.6847	38.385	71.2318	128.366	1.48785	7.25551	6.83072e-285	3.65717e-282	2.80471
Gbp8	2.21918	2.7143	2.15817	5.5746	7.72621	23.3289	1.36731	3.32439	2.0986e-16	5.89038e-15	2.5799
Gbp9	13.2855	13.3814	10.6956	21.2003	44.7909	66.6204	0.986874	5.91324	1.39193e-51	1.23692e-49	1.98189
Gch1	5.00847	5.33334	28.4949	18.2109	16.6443	9.83608	-0.645794	5.97292	3.02391e-27	1.44554e-25	0.639141
Gclc	36.6125	44.6529	499.902	383.112	103.03	56.7099	-0.861356	8.05066	5.21989e-206	6.69396e-204	0.550435
Gcnt2	16.3505	17.0758	47.2906	43.4815	38.2627	19.5282	-0.970297	6.92736	5.80011e-121	4.15435e-119	0.510401
Gdf10	9.97424	9.62389	6.51512	5.30964	0.822164	3.50867	2.08823	2.53444	4.37118e-20	5.92489e-19	4.25226
Gdf15	1.44392	1.18431	229.059	107.111	16.4709	36.7263	-1.09654	7.44406	7.12068e-208	2.67538e-205	0.467638
Gdpd3	4.80158	40.7761	4.56481	26.8874	2.57435	43.0142	2.55573	4.18961	3.62704e-73	4.43867e-71	5.87964
Gem	14.4394	13.7813	110.204	64.5931	14.7046	10.3921	-0.770686	7.57723	8.7173e-113	1.74476e-110	0.586139
Gfpt2	6.22397	8.22736	34.4108	24.2102	18.4343	10.5552	-0.804245	5.39264	3.62752e-29	6.74952e-28	0.572662
Gfra2	11.5193	11.3644	3.65282	6.85885	2.52949	9.29028	0.908399	4.23802	5.71205e-15	1.46854e-13	1.87696
Gga2	8.48432	9.05241	4.91834	6.473	6.072	9.11941	0.586612	5.24608	4.22742e-14	4.21286e-13	1.50172
Gimap4	48.183	51.7095	28.1124	38.767	36.7337	79.1936	1.10817	6.76893	8.3388e-127	6.33275e-125	2.15571
Gipc3	14.5895	12.7157	7.10984	9.2396	3.69071	10.0817	1.44742	2.8878	2.00578e-14	2.03197e-13	2.7272
Gja5	24.5163	25.8618	6.20996	9.84169	4.25215	11.753	1.46609	4.70789	8.90983e-49	2.6319e-47	2.76271
Gli2	1.93298	2.34006	0.644031	1.33133	0.38428	1.7176	2.15594	2.91246	8.106e-27	1.42177e-25	4.4566
Glod4	12.2109	12.4799	8.55675	10.4253	5.96546	10.8122	0.857533	4.44767	2.17221e-16	2.42925e-15	1.81194
Glp1r	35.4826	18.9371	10.8782	13.2727	5.41437	19.1167	1.81871	4.26631	6.02554e-51	1.86748e-49	3.52766
Glul	132.848	156.35	450.092	362.256	265.556	135.326	-0.972558	9.07169	0	0	0.509602
Gm10872	1.01923	0.652785	18.486	21.2242	13.3791	5.41248	-1.30403	3.12152	6.90586e-16	7.52358e-15	0.404994
Gm11201	2.22816	1.63435	2.39634	2.005	2.80444	0.950752	-1.55766	2.57208	3.07038e-15	3.23758e-14	0.339701
Gm12185	0.745097	0.661496	1.92201	2.67743	4.50047	8.98088	0.996487	5.19975	6.94068e-35	1.53397e-33	1.99514
Gm12191	47.2514	29.5999	54.9704	31.9083	42.3797	35.9598	-0.784306	4.32828	1.95869e-13	4.48635e-12	0.580631
Gm12250	3.26721	2.45604	5.36501	17.8072	55.6925	121.189	1.73008	5.05979	5.84727e-75	7.49852e-73	3.31746
Gm12824	7.50552	7.23137	5.12669	4.98876	2.37833	4.06687	0.773598	4.45441	5.47877e-14	5.41455e-13	1.70953
Gm1337	3.22561	2.50955	0.431994	2.62144	0.0477054	0.25654	2.59527	3.01217	1.3137e-33	7.70802e-32	6.043
Gm13889	57.5331	58.0606	709.555	447.657	598.976	159.853	-0.66451	9.50451	1.95900325970175e-314	1.31106293155539e-311	0.630903
Gm14047	0.139598	0.152798	5.21524	4.21945	4.14173	1.05832	-1.96141	1.76318	4.37716e-13	4.11327e-12	0.256777
Gm15441	136.937	131.173	142.997	150.974	139.742	80.2809	-0.799589	7.48124	2.60628e-120	1.85435e-118	0.574513
Gm16548	0.952071	1.01908	41.2008	31.6162	21.4412	4.08639	-2.38924	3.87531	5.31606e-71	2.22361e-69	0.190882
Gm16596	12.1808	10.4378	10.5734	10.0841	7.14471	13.264	0.891982	4.02531	1.59409e-13	1.54745e-12	1.85572
Gm2a	21.644	21.0344	21.7805	20.8182	14.9366	25.5278	0.773131	6.4682	1.32661e-52	4.21525e-51	1.70897
Gm3776	0.222973	0.178442	3.67282	3.53714	7.53189	2.05942	-1.86513	1.97468	8.36887e-14	8.21392e-13	0.274499
Gm4070	2.36309	2.91341	1.91141	4.69997	5.66115	10.1932	1.29749	4.97292	4.14758e-44	3.19513e-42	2.45801
Gm4841	0.252152	0.0751607	1.08763	3.38482	23.4278	12.7616	1.63457	2.75301	4.09902e-15	1.06277e-13	3.10494
Gm4902	2.02924	2.55029	0.957137	2.78266	3.54479	10.8576	1.61265	3.14252	5.4639e-20	7.36406e-19	3.05813
Gm4951	2.27814	2.17406	2.93575	7.03555	26.2972	41.5168	1.2598	3.79301	1.81413e-19	6.06108e-18	2.39463
Gm5077	5.43718	5.16428	4.95909	5.43954	5.56799	10.9918	0.980738	4.51202	1.17715e-21	1.71847e-20	1.97347
Gm5424	10.6817	9.84353	13.4905	14.946	13.9184	29.2518	1.07119	5.11835	2.05622e-37	4.87125e-36	2.10117
Gm5483	0.206421	0.192482	16.135	16.8329	18.8485	6.70096	-1.48875	2.3226	4.88096e-12	4.26482e-11	0.356322
Gmppa	20.2521	17.0786	18.9318	17.8456	18.5747	29.5222	0.668275	5.23439	1.26097e-17	1.50195e-16	1.58917
Gnb4	11.9959	11.7027	9.32719	12.4731	10.4626	18.5581	0.826595	5.36163	6.80678e-28	1.23016e-26	1.77349
Gng11	75.9294	77.5645	35.7092	43.5848	31.2124	52.8018	0.75825	5.17346	3.44214e-21	4.9342e-20	1.69144
Gnl3	4.8167	6.51561	14.2742	12.9367	16.3404	9.27029	-0.817406	4.54867	1.88713e-17	2.22794e-16	0.567461
Got1	8.39536	8.48604	8.39647	11.919	10.46	16.3078	0.640445	4.81642	1.54947e-12	1.39602e-11	1.55881
Gp1bb	6.49494	4.75979	6.00609	5.83392	10.8684	5.70275	-0.929847	4.06104	4.97051e-16	5.45889e-15	0.524914
Gp49a	2.64849	2.84406	109.455	122.77	97.423	63.6944	-0.613036	6.68303	1.13663e-41	2.92926e-40	0.653819
Gpc4	7.91094	8.17384	12.0442	11.6867	17.7198	11.7726	-0.589762	5.06764	2.08443e-13	1.99911e-12	0.664453
Gpm6a	17.4124	20.3484	7.9665	13.5654	4.61317	7.9124	0.767683	5.21191	7.01971e-21	2.51816e-19	1.70253
Gpnmb	4.30881	3.26227	4.09286	4.11749	5.61996	18.3917	1.70997	5.5913	1.59777e-113	1.06597e-111	3.27154
Gpr153	19.6506	16.3583	12.084	12.2662	6.8025	11.2968	0.731558	5.13311	2.84037e-19	3.70459e-18	1.66043
Gpr97	3.295	3.83539	7.81791	7.87909	10.1161	5.19832	-0.960004	4.17142	2.72563e-18	3.36633e-17	0.514055
Gprc5b	12.8894	12.0447	20.3494	19.4633	15.5786	9.08318	-0.778154	5.76046	5.3129e-35	1.18153e-33	0.583113
Gpx2	15.5684	16.073	64.6239	54.0938	56.4145	15.1163	-1.89933	5.16116	7.27092e-118	5.05565e-116	0.268069
Gpx2-ps1	4.9028	5.44855	21.4493	15.0773	13.5482	5.16259	-1.39029	3.17957	2.74485e-18	3.38811e-17	0.381489
Gramd1a	28.563	29.3344	110.742	77.0931	59.7141	38.3592	-0.638449	7.00424	6.68805e-56	2.2345e-54	0.642403
Grap	62.8025	61.6651	83.2743	67.7243	84.1263	51.3494	-0.712143	6.72087	3.4064e-57	1.15247e-55	0.610413
Grb10	15.3546	16.6673	10.9682	11.5219	9.18619	14.6133	0.669633	5.95523	1.20759e-28	2.21989e-27	1.59067
Grn	117.992	107.142	96.2253	108.677	111.417	194.608	0.80458	8.52137	1.44555e-229	2.05019e-227	1.74664
Grrp1	20.4569	24.7003	51.2124	29.6414	52.7383	24.8811	-0.788704	5.58335	3.1601e-30	1.6835e-28	0.578864
Gsn	1539.04	1324.41	1436.32	1015.93	640.894	401.729	-0.673857	10.4029	0	0	0.626829
Gsr	18.4022	20.3833	101.744	100.65	81.7567	53.1453	-0.621359	7.46027	4.3902e-72	1.87292e-70	0.650059
Gsta1	0.544653	0.314348	4.22968	4.31917	8.70886	2.25105	-1.94653	2.14252	1.07587e-16	1.22819e-15	0.259439
Gstt1	57.2478	51.3963	41.0391	42.0705	15.9484	40.3902	1.34008	4.93431	8.61563e-49	2.54851e-47	2.53166
Gucy1a3	48.2068	50.2136	33.2756	42.1709	11.4217	20.5431	0.846753	6.26056	2.95586e-54	9.66453e-53	1.79845
Gucy1b3	41.0141	40.7963	30.5245	37.0656	11.9686	18.9069	0.659525	5.68374	5.84068e-23	9.01832e-22	1.57956
Gusb	18.5253	18.0274	12.3811	14.659	13.4899	24.4454	0.857499	5.58594	1.84399e-34	4.00111e-33	1.81189
Gvin1	2.3623	2.91244	1.91078	4.69841	5.65927	10.1898	1.29749	4.97292	4.14758e-44	3.19513e-42	2.45801
Gyg	53.9837	54.5834	22.5265	34.0687	16.559	41.9902	0.596687	5.63536	1.37283e-17	4.20008e-16	1.51224
Gzma	10.5229	13.3279	9.27551	11.1058	4.30443	18.7376	2.11918	3.43241	1.58336e-36	3.6619e-35	4.34448
Gzmb	2.42152	2.95862	4.79314	3.98946	2.7498	7.45344	1.43631	2.92221	1.02293e-14	1.05019e-13	2.70627
H19	0.650955	0.659066	0.708692	0.462505	0.198079	2.36214	3.55137	1.86777	2.3485e-24	3.81315e-23	11.7238
H2-Aa	238.408	222.276	227.715	241.693	141.196	287.009	1.02335	7.89044	2.04373e-235	3.01852e-233	2.03263
H2-Ab1	311.998	273.473	273.991	286.954	189.396	453.988	1.26121	8.64674	0	0	2.39697
H2afz	35.7149	26.6894	52.0098	48.8146	68.5189	44.7295	-0.615161	5.72679	4.15135e-22	6.17827e-21	0.652857
H2-DMa	38.64	39.6062	29.6165	46.9013	35.1687	113.981	0.662984	4.94021	1.54173e-13	3.55794e-12	1.58335
H2-DMb1	25.0825	22.2893	20.1278	31.2715	24.7781	60.5019	0.63545	5.08187	8.89135e-14	2.0948e-12	1.55342
H2-DMb2	25.4928	24.7864	16.5599	23.4569	12.2332	34.9993	1.51557	4.28721	7.38413e-39	1.80937e-37	2.85912
H2-Eb1	146.083	126.895	148.032	137.659	76.0727	154.678	1.02376	7.64122	1.57464e-198	1.97207e-196	2.03321
H2-M3	10.1955	6.23993	7.83571	11.6515	10.2006	22.1178	1.11603	4.58134	3.62809e-28	6.60146e-27	2.1675
H2-Q10	4.16981	3.41514	37.9774	19.7569	15.1509	12.1071	-0.942537	5.35334	4.69334e-36	2.89662e-34	0.520317
H2-Q8	16.0806	11.3783	40.9269	29.3727	20.9447	34.5876	0.723446	5.07531	2.3928e-18	2.96209e-17	1.65112
H2-T10	5.7435	6.40818	7.32435	9.51247	10.6068	18.5771	0.808336	5.44345	2.85296e-28	5.21323e-27	1.75119
H2-T22	26.4731	22.9886	24.0325	37.855	41.4654	85.2315	0.655363	5.80423	4.53477e-23	1.81527e-21	1.57501
H2-T23	83.2421	62.0381	69.8706	118.281	133.419	380.387	0.759392	6.99758	5.40207e-68	6.25355e-66	1.69278
H2-T24	17.812	31.645	21.4542	24.7711	21.5295	47.5117	1.1418	6.29239	6.97173e-97	3.93948e-95	2.20657
H2-T9	28.0607	24.4244	25.5893	40.309	43.9175	89.8736	0.655431	5.79371	6.13454e-23	2.42842e-21	1.57509
H6pd	75.2867	74.556	147.813	125.098	167.882	88.8633	-0.917771	9.20006	0	0	0.529326
Hadh	40.9206	43.8459	25.3165	33.2484	19.5617	37.7185	0.947042	5.67079	1.60266e-43	4.27963e-42	1.92792
Hap1	8.03204	8.28985	5.12639	7.14948	11.3946	18.4256	0.693233	5.82424	1.69565e-27	3.02869e-26	1.6169
Has1	2.63469	1.95689	76.5918	35.8941	12.1995	2.77648	-1.09334	6.81329	3.87912e-134	9.02991e-132	0.468677
Hbp1	11.5757	10.7674	15.5358	13.1072	19.8998	12.0605	-0.722307	5.56587	8.62919e-27	1.5123e-25	0.606127
Hcn4	0.426548	0.423581	3.898	2.69443	0.844426	0.0857169	-3.26221	0.685174	2.63071e-13	2.51179e-12	0.104227
Hdac4	5.99142	5.63992	11.1799	9.4218	8.58535	5.54514	-0.630426	4.76453	1.41581e-12	1.27937e-11	0.645985
Hdc	24.6535	23.7232	169.149	118.959	86.6915	46.4438	-0.900345	7.25864	9.04179e-131	7.14535e-129	0.535759
Herc6	2.46142	3.11111	2.59415	4.91858	8.54125	17.5087	0.922459	4.36286	1.44635e-16	4.10264e-15	1.89534
Hexa	38.9882	35.4864	26.8535	29.2144	21.4154	33.8966	0.662358	5.72331	7.78594e-24	1.23422e-22	1.58267
Hgsnat	14.8042	15.956	14.9878	14.4475	13.6484	20.4844	0.585664	5.54552	4.67696e-17	5.40831e-16	1.50073
Hhip	4.38396	4.93196	2.01806	2.55723	0.718843	1.92898	1.42274	3.65626	4.49191e-23	6.97598e-22	2.68095
Hif1a	8.6872	11.5761	34.4579	42.9665	64.5955	23.8169	-1.43937	7.6438	0	0	0.368728
Hip1	29.846	29.1694	19.4799	20.3352	14.9545	23.6388	0.660535	7.27846	1.96554e-67	7.72368e-66	1.58067
Hipk3	26.1896	27.1288	36.0286	34.3582	31.3257	19.7861	-0.662826	7.54611	9.19355e-87	4.63268e-85	0.63164
Hist1h1c	38.4697	39.7766	48.9929	45.5383	27.3821	16.3833	-0.740785	5.05441	4.03083e-20	5.47049e-19	0.598414
Hk3	1.57604	1.31928	10.6917	17.9005	18.5575	53.3751	0.743323	5.56779	9.04802e-25	3.85233e-23	1.67403
Hlf	3.65315	2.76077	2.87463	4.78788	2.82851	3.91259	0.735639	4.483	3.28882e-12	6.77244e-11	1.66513
Hmcn1	10.1928	9.29818	5.07169	5.53096	1.74033	2.94114	0.756836	5.46111	2.26183e-25	3.80514e-24	1.68978
Hmgxb4	7.71517	7.67895	5.79268	6.41577	4.39172	7.06058	0.684687	4.4958	1.16893e-11	9.9776e-11	1.60735
Hp	681.747	662.334	1823.33	1175.31	1863.88	1438.41	-0.633526	10.9391	0	0	0.644599
Hpse	2.76655	2.33929	1.882	2.94461	1.78318	4.97917	1.47981	3.45273	1.41402e-21	2.05725e-20	2.78913
Hpx	0.946469	0.970757	36.6726	23.3805	22.4632	12.6414	-0.64924	5.43415	4.78648e-19	1.55786e-17	0.637616
Hs2st1	36.1802	39.0866	21.8959	27.0128	14.8428	23.0714	0.636271	6.54434	1.97966e-38	4.78514e-37	1.55431
Hs6st1	16.0513	15.7962	54.593	38.1884	29.7858	17.9028	-0.734353	6.43113	5.42965e-50	1.63777e-48	0.601088
Hsd11b2	1.08368	1.40767	14.0107	6.89173	16.4331	5.73291	-1.02299	4.21086	6.68646e-20	2.27659e-18	0.492096
Hsp90b1	157.339	201.649	137.386	172.372	119.825	209.048	0.802885	8.86713	5.19346e-290	9.67157e-288	1.74459
Hspa12b	53.4921	49.9828	25.6511	30.6473	24.7305	51.7428	1.06497	6.86808	6.06266e-126	4.53979e-124	2.09212
Hspa1b	39.8237	43.6682	13.499	23.5971	25.0051	21.2183	0.805589	5.75083	3.79165e-32	2.14253e-30	1.74786
Hspb1	83.5286	78.5625	257.078	170.265	298.249	77.7125	-0.594392	7.5558	1.58978e-66	1.78255e-64	0.662324
Hspb6	10.3031	9.452	14.5711	16.9741	22.4569	9.70399	-1.20989	4.34995	6.13869e-31	1.20501e-29	0.432302
Htra3	13.1743	15.1542	5.5607	7.25723	2.40251	7.53444	1.64751	3.84488	4.85797e-33	1.01501e-31	3.13292
Hyal1	16.2942	14.591	13.3568	13.6686	8.65614	15.6561	0.854596	4.76859	4.20018e-20	5.69672e-19	1.80825
I830012O16Rik	9.65444	10.6467	10.2038	25.9398	53.8067	105.311	1.34562	5.25959	5.98126e-57	6.01384e-55	2.54139
Ibtk	6.06882	6.36459	10.3595	9.16505	13.9349	8.48149	-0.7162	5.9463	1.71689e-34	3.74048e-33	0.608699
Icam1	242.29	208.928	2053.7	1299.32	1009.52	621.253	-0.660467	12.0153	0	0	0.632673
Icam2	131.277	116.84	88.1382	91.5299	59.9242	97.356	0.700053	6.52528	2.26771e-45	6.32359e-44	1.62456
Icosl	7.88004	7.23563	19.1001	17.9481	27.11	15.9293	-0.76701	5.84488	4.68463e-36	1.07415e-34	0.587634
Id2	21.1607	23.2359	41.1179	44.9585	86.0513	57.2332	-0.588281	6.47814	1.32722e-33	2.81702e-32	0.665135
Id3	121.105	115.761	146.971	116.619	217.22	118.211	-0.877737	7.27371	1.26351e-125	9.3956e-124	0.54422
Ide	12.9145	14.9536	9.20687	13.1828	9.94771	16.4385	0.724531	6.07093	9.29591e-36	2.10891e-34	1.65236
Idh2	56.1686	50.1907	44.2716	41.5066	24.2875	38.9795	0.682374	5.78538	3.8977e-26	6.6993e-25	1.60478
Ido1	0.389697	0.358451	0.755514	2.57771	4.6749	25.8095	2.46332	4.67079	3.79614e-104	2.32946e-102	5.51484
Ier2	62.2163	61.3309	399.055	236.371	137.478	69.8704	-0.755515	8.87174	3.78313e-263	1.65346e-260	0.592335
Ier3	54.7911	55.4212	904.619	539.106	284.876	182.694	-0.746732	9.57462	0	0	0.595952
Ier5l	10.374	9.9461	20.9685	16.4383	42.5011	23.9996	-0.824323	5.65187	2.86095e-36	6.58818e-35	0.564747
Ifi204	1.70902	2.32521	6.39707	9.54754	13.439	28.6498	1.09186	5.64894	3.13317e-55	1.0387e-53	2.13148
Ifi27l2a	42.5077	29.8983	34.2399	27.418	15.9479	40.2097	1.33303	3.76589	3.59902e-22	5.37869e-21	2.51931
Ifi44	2.93209	3.72166	1.37957	3.85096	6.84808	18.0474	1.47858	3.00733	3.00558e-15	7.90757e-14	2.78674
Ifi47	18.2675	18.3178	47.5931	75.8338	165.733	274.465	0.672019	6.72964	3.86561e-45	3.05483e-43	1.5933
Ifih1	7.20108	6.80661	6.58246	9.37385	10.6994	16.7306	0.644874	6.27585	5.46452e-33	1.14062e-31	1.5636
Ifit1	8.18784	9.41414	9.79686	24.0563	53.6818	77.863	1.29568	5.55289	5.84796e-65	6.38979e-63	2.45492
Ifit2	5.81663	6.80676	5.73237	14.2859	19.6475	49.0387	1.31699	5.37797	2.22042e-59	2.28617e-57	2.49146
Ifit3	20.0284	18.0554	24.6029	53.4994	125.545	225.208	1.12053	6.34951	8.78034e-91	1.40328e-88	2.17426
Ifitm5	3.05806	2.9431	15.4878	9.32892	10.011	2.73365	-1.86744	2.08293	1.12193e-14	1.14744e-13	0.274059
Ifitm6	2.38659	2.62034	46.973	79.3929	37.6561	16.2722	0.756933	5.13952	2.43456e-19	8.05852e-18	1.68989
Ift172	13.9928	14.2809	9.73964	9.21824	6.75053	10.2157	0.597579	5.55103	1.02991e-17	1.23359e-16	1.51317
Igf1	4.61119	6.08872	2.08767	4.71022	2.21	4.38723	1.17333	4.66337	2.20263e-30	1.1882e-28	2.25532
Igfbp3	47.0532	54.3404	74.1861	55.7734	320.223	57.7642	-2.47075	8.73675	0	0	0.180397
Igfbp6	151.813	141.955	159.329	102.431	105.468	61.3038	-0.637315	7.35954	7.87559e-67	8.924e-65	0.642908
Igsf10	3.63134	3.82764	1.97575	2.84766	0.584717	1.47611	1.33455	3.4426	3.44714e-18	4.23545e-17	2.52197
Igtp	14.3348	16.0274	28.2925	90.4799	282.773	508.073	1.67699	6.99788	1.82269e-296	1.05499e-293	3.19761
Iigp1	8.42571	10.0578	40.0303	80.4598	226.025	357.782	1.00711	7.61358	2.69428e-176	8.61205e-174	2.00989
Ikzf3	5.87934	4.92664	3.83839	3.38036	1.31316	2.94644	1.16449	3.18363	2.25075e-12	2.00258e-11	2.24153
Ikzf4	2.90994	2.43037	10.7161	6.32275	4.37995	3.72026	-0.760887	4.88444	5.53932e-18	1.71679e-16	0.590133
Il12rb1	0.382765	0.347164	0.688223	0.824378	1.61474	3.77107	1.22195	3.01167	3.943e-12	3.46363e-11	2.33261
Il17a	0.0259936	0.00258907	6.74399	3.50543	4.1069	0.278012	-3.84526	1.21569	1.63057e-21	2.36587e-20	0.0695763
Il17f	0.00258025	0.00258025	2.522	2.22034	3.50858	0.198642	-4.08713	0.97468	7.3323e-20	9.80202e-19	0.058837
Il17ra	15.1608	12.8859	49.2151	48.6829	66.3252	41.4097	-0.679557	7.70401	1.81304e-101	1.0726e-99	0.624357
Il18bp	5.2802	4.44707	9.064	17.9005	32.4463	75.5221	0.981195	4.29683	1.00168e-17	3.08663e-16	1.9741
Il18rap	1.05065	0.779416	11.1128	10.9519	11.7627	4.88537	-1.267	4.30222	9.66147e-33	2.003e-31	0.415523
Il1b	3.3894	3.80529	480.096	368.819	209.852	98.0189	-1.09818	7.61666	4.06834e-248	6.40643e-246	0.467105
Il1r1	9.78223	12.4291	26.5914	27.1099	36.6294	11.3084	-1.69543	6.76385	0	0	0.308763
Il1r2	1.0022	1.06978	136.391	103.055	59.4336	34.0006	-0.805589	5.92827	1.27381e-41	3.2749e-40	0.572128
Il20rb	1.41691	1.19693	7.61705	5.04501	6.51249	2.43696	-1.41668	3.39789	5.70918e-22	8.42645e-21	0.374574
Il23a	0.123232	0.213223	8.39778	4.01475	3.91768	0.883713	-2.13934	1.60271	2.73831e-13	2.61219e-12	0.226983
Il2rb	8.80462	11.3742	14.2756	14.249	10.2728	16.6809	0.699165	5.21965	7.76337e-19	9.90825e-18	1.62356
Il2rg	35.6884	36.1346	54.8268	54.6949	44.9015	82.5471	0.878364	6.72783	1.13723e-79	5.26024e-78	1.83829
Il34	10.1114	10.6412	32.516	23.6837	31.2557	18.7523	-0.736889	5.48268	3.05381e-26	5.27422e-25	0.600032
Il3ra	20.3704	16.3754	20.6189	15.5454	13.8752	22.4114	0.691446	4.69658	2.54534e-13	2.43136e-12	1.6149
Il4i1	5.49086	4.29718	99.2752	60.234	108.983	38.0629	-0.720807	7.30723	3.23966e-82	4.50524e-80	0.606758
Il4ra	41.2667	40.1198	181.134	145.055	200.74	89.6259	-1.16332	9.4697	0	0	0.446484
Il6	0.00278914	0.108304	79.8887	65.307	13.7409	1.82542	-2.90606	2.95582	4.99241e-50	1.51013e-48	0.13341
Il6st	79.3604	78.7535	117.827	99.7978	109.689	72.7799	-0.591797	8.92646	9.88765e-178	1.05877e-175	0.663516
Il7	0.820658	0.619111	10.8906	4.56368	1.66569	1.17403	-1.25404	4.18318	4.55461e-28	2.25791e-26	0.419274
Impdh1	97.1084	87.0466	66.8737	64.8513	34.7871	72.1552	1.05246	7.06187	1.25954e-140	1.06618e-138	2.07407
Inhbb	9.86198	11.2546	29.3517	25.7452	57.2033	11.5762	-2.30471	7.08592	0	0	0.202401
Inmt	1505.5	1257.91	817.731	726.118	275.792	420.798	0.609529	8.509	1.99708e-133	1.61394e-131	1.52576
Iqsec2	17.1743	16.0005	13.4484	14.3874	9.27878	14.3209	0.626029	6.17703	2.9154e-29	5.45295e-28	1.54331
Irak3	2.27184	2.60217	11.7582	9.99695	34.824	16.6679	-1.06286	6.20025	3.01896e-88	1.53938e-86	0.478681
Irf7	16.3071	14.2023	19.2766	35.4609	57.587	132.177	0.879184	5.72004	6.58213e-37	4.1582e-35	1.83934
Irgm1	14.3877	14.3704	40.4061	67.9335	173.165	261.324	0.749483	6.95854	1.3171e-64	1.4246e-62	1.68119
Irgm2	15.1393	17.4847	29.8195	52.9954	113.668	193.346	0.829545	7.23336	2.9402e-94	4.80666e-92	1.77713
Irgq	10.8352	10.1952	19.4874	12.8763	11.0438	8.75794	-0.597756	6.59431	2.31356e-35	1.40759e-33	0.660781
Irs2	15.9652	16.982	59.2145	39.0801	33.2009	15.78	-0.599484	7.58681	4.41741e-69	5.19798e-67	0.65999
Isg15	13.0911	9.9665	20.4802	43.7925	84.3901	162.849	1.09594	4.66491	5.57456e-27	2.61809e-25	2.13752
Isg20	31.2814	28.7736	61.5052	53.9185	40.1544	69.3058	0.787284	5.93008	3.52128e-37	8.28151e-36	1.72582
Islr	11.2619	10.3533	8.86326	8.40891	2.7504	5.81497	1.07892	3.30781	7.35602e-12	6.35997e-11	2.11246
Itga1	14.8263	16.4033	10.8774	11.7299	8.31223	16.0364	0.94791	6.23488	7.55368e-66	2.92531e-64	1.92908
Itga4	3.03869	3.34636	2.92339	3.00408	2.44444	3.72581	0.607849	4.95463	1.41278e-12	1.27717e-11	1.52398
Itga6	27.7464	30.9634	28.4834	27.5662	15.4443	32.3679	1.06738	6.70543	3.45699e-113	2.29922e-111	2.09562
Itga7	7.33648	7.15255	29.6714	20.2038	35.1132	23.1067	-0.603648	6.83814	7.54006e-45	2.0809e-43	0.658088
Itga8	24.094	26.4989	20.0001	22.0507	2.89002	7.18819	1.31405	4.92948	5.23529e-47	1.509e-45	2.48638
Itgal	13.7328	10.9835	19.0868	15.1564	19.2952	30.1936	0.645949	7.0483	2.33606e-55	7.76847e-54	1.56477
Itgam	3.24941	4.96946	23.3685	19.4497	51.9008	31.6977	-0.711341	7.5744	1.08159e-101	6.41645e-100	0.610752
Itgax	6.63965	5.09198	8.07574	11.5824	8.3877	12.8901	0.619776	5.45273	9.55277e-18	1.14612e-16	1.53664
Itgb2l	0.702552	1.11102	2.94583	6.74752	3.34495	1.1275	1.19458	3.73259	4.4581e-17	1.31871e-15	2.28877
Itgb7	20.6023	16.2575	13.4013	16.7845	12.8822	27.0014	1.06744	5.79071	2.51868e-58	8.65812e-57	2.09571
Itpkc	7.55525	8.12725	55.2156	30.4576	20.1279	8.96383	-0.858204	7.0551	7.84139e-98	1.31196e-95	0.551639
Jag2	20.8904	18.0651	19.2755	17.1418	8.29947	21.0604	1.34319	5.96115	7.86762e-98	4.49315e-96	2.53712
Jam2	9.63309	10.8423	9.37261	10.2591	6.31969	11.7368	0.892904	5.48843	1.05975e-34	2.31825e-33	1.85691
Jmjd1c	7.33786	8.21504	14.3648	13.4856	10.5711	6.49151	-0.703399	6.16219	1.94165e-38	4.69857e-37	0.614124
Jph2	18.0691	16.6204	9.36457	8.96838	6.86394	10.3362	0.590433	5.21767	4.32612e-14	4.30922e-13	1.5057
Junb	45.3568	67.9875	1037.45	595.527	433.506	228.07	-0.800802	10.5045	0	0	0.57403
Kalrn	2.15524	2.15953	4.48218	4.23856	4.19162	2.45626	-0.770887	5.64011	8.32268e-32	1.67675e-30	0.586057
Kank3	115.34	116.474	102.954	92.649	64.8199	97.4676	0.588458	7.77061	1.80249e-75	8.02539e-74	1.50364
Kcna2	3.28945	3.89869	0.996022	1.44605	0.271966	1.61139	2.56311	3.55338	8.35666e-52	2.61647e-50	5.90981
Kcnb1	3.20464	3.03399	2.29512	2.21126	0.805698	1.77252	1.13664	3.90265	1.31573e-18	1.66044e-17	2.19869
Kcnc3	23.3364	21.1732	16.9437	16.9038	14.3386	26.8014	0.902319	6.74681	6.72057e-85	3.31631e-83	1.86907
Kcne4	3.67326	6.57497	16.9282	17.0469	12.4991	4.49082	-1.47596	4.31152	4.67502e-43	1.23453e-41	0.359494
Kcnk1	5.84443	6.75785	10.0972	9.99631	13.3923	7.6237	-0.812496	4.55338	2.83975e-17	3.32329e-16	0.569396
Kcnk3	40.6433	35.2773	26.5316	26.105	7.7197	14.9357	0.951915	5.48021	8.75352e-39	2.14246e-37	1.93444
Kcnk5	4.48993	4.01273	3.53923	2.167	4.62717	2.31558	-0.997857	3.49253	1.06062e-12	9.67268e-12	0.500743
Kctd15	10.948	11.9021	4.86145	5.9658	4.67631	9.5563	1.03045	4.15291	1.13471e-18	1.43708e-17	2.04265
Kctd21	6.63837	7.33744	2.5111	3.4259	3.0995	6.10708	0.977698	3.82424	6.613e-14	6.51744e-13	1.96932
Kdelc2	12.388	14.9567	9.61401	12.1047	4.20882	9.38261	1.15607	4.68803	5.23571e-32	1.05981e-30	2.2285
Kdelr3	11.8448	10.939	5.97756	8.15869	6.71916	13.3292	0.987504	3.87531	1.33484e-14	1.36323e-13	1.98275
Kdm5a	7.03622	8.36705	8.19227	8.85622	9.57714	6.2715	-0.610713	6.40877	1.73533e-34	3.77681e-33	0.654873
Kdm6b	25.5014	25.354	135.284	83.3821	53.8149	34.5493	-0.698175	9.46222	0	0	0.616351
Kif1a	1.24507	1.19033	1.64359	1.57834	2.78598	1.51814	-0.875374	4.1045	6.27382e-15	6.50654e-14	0.545112
Kif26a	19.987	17.2097	12.508	11.5659	8.18833	12.7944	0.643786	6.21519	1.34629e-31	2.69458e-30	1.56242
Klf10	16.9581	25.5516	27.7489	31.9027	33.3535	20.0952	-0.730898	6.30734	1.34071e-45	3.74839e-44	0.602529
Klf4	115.804	104.943	57.0751	72.18	46.6159	87.7906	0.913198	7.72331	4.30213e-169	4.28532e-167	1.88322
Klf9	102.656	125.587	177.536	148.261	108.226	67.6228	-0.678436	8.12799	4.76557e-135	3.92536e-133	0.624842
Klhl21	20.5752	20.9031	31.3362	21.9672	25.12	16.0174	-0.649115	6.28909	8.02212e-36	1.82573e-34	0.637671
Klhl25	14.7932	13.7406	22.6296	13.7295	11.9343	11.8564	-0.720807	5.89957	1.95417e-31	1.08986e-29	0.606758
Klhl29	1.19862	1.09664	5.46304	3.40477	2.82671	1.92973	-0.681908	4.92358	4.77939e-15	1.23469e-13	0.62334
Klhl5	82.0441	88.1873	80.2232	73.0374	39.3201	69.5992	0.823758	7.57864	7.08708e-126	5.2884e-124	1.77001
Klhl6	6.74753	4.87361	11.3871	8.06746	16.155	9.90582	-0.705402	4.9319	4.66725e-17	5.39999e-16	0.613272
Klra2	0.742722	1.66385	4.71049	6.34714	3.70275	7.86797	1.08633	3.50231	1.56221e-13	1.51729e-12	2.12333
Kntc1	0.209106	0.264064	0.257371	0.347058	0.312777	1.21832	1.95691	2.50231	6.88461e-18	8.34413e-17	3.88229
Krt19	126.536	97.7255	161.754	135.177	68.4281	110.775	0.69492	6.97906	1.14765e-60	4.1447e-59	1.6188
Krt80	77.2318	88.566	86.6015	77.2288	38.8983	59.8673	0.62199	6.48556	1.98218e-35	4.46377e-34	1.539
Krt83	0.316853	0.211034	1.48776	1.93087	2.38305	0.380147	-2.63132	1.21569	5.62237e-14	5.55391e-13	0.161396
Ksr1	12.1561	12.2028	20.2814	17.0402	23.4844	11.9681	-0.972366	6.12522	2.0255e-70	8.39037e-69	0.50967
Lair1	0.820255	0.904402	1.08963	1.52606	2.54235	6.66538	1.38955	4.08293	2.05726e-29	3.858e-28	2.61998
Lama5	40.2295	33.5554	92.3314	68.4191	60.4117	35.8143	-0.754277	9.05745	9.49038051015917e-316	1.97326202917117e-313	0.592843
Lamb1	38.1698	33.9445	36.4729	34.2847	16.0028	25.3343	0.662711	6.93461	7.84929e-54	2.54698e-52	1.58305
Lamp3	54.6914	63.3068	68.3341	77.7631	49.2926	85.8098	0.799736	7.8605	3.06075e-144	2.68644e-142	1.74078
Lap3	10.7367	10.9717	13.0868	17.7544	27.2338	45.5067	0.740586	6.40399	1.72653e-46	4.91692e-45	1.67085
Las1l	13.4935	12.5832	15.3601	15.0837	24.9313	13.0006	-0.939182	5.57285	7.78851e-44	2.09283e-42	0.521529
Lbh	112.647	110.254	32.3051	53.2753	32.3389	94.5977	0.721646	7.07899	2.99745e-65	3.29197e-63	1.64906
Lclat1	12.8709	13.4638	9.07108	9.77283	7.00881	12.4719	0.83124	5.48843	1.43574e-30	2.7826e-29	1.77921
Ldb2	29.6447	36.053	23.6167	24.7553	19.4223	30.7526	0.662891	6.07422	2.12618e-30	4.09849e-29	1.58325
Lepr	14.3447	18.2985	12.8941	14.3234	13.1605	7.44532	-0.821665	5.79071	1.86886e-39	4.61631e-38	0.565788
Lgals1	80.5453	62.6321	65.1462	78.24	54.7881	201.81	1.88083	6.76791	0	0	3.68286
Lgals3bp	92.5117	76.306	82.185	106.331	130.664	245.292	0.908617	8.71746	0	0	1.87725
Lgals9	60.1895	56.3731	62.2973	67.0928	66.4533	120.94	0.863818	7.25984	7.81404e-111	5.08649e-109	1.81985
Lgi3	101.184	93.2245	55.1017	58.6342	13.8868	39.1519	1.49517	6.47069	4.33017e-180	4.80492e-178	2.81897
Lgr4	1.57134	1.45507	2.19451	2.23224	3.48331	1.3027	-1.41762	3.52488	8.23411e-24	1.30334e-22	0.374329
Lhfpl2	2.79306	2.86719	2.12834	2.43129	4.06688	7.0369	0.790683	4.63419	3.78649e-16	4.17566e-15	1.72989
Lif	1.04515	1.53383	47.1428	36.1062	10.8739	2.80079	-1.95604	4.68374	2.9551e-89	1.52866e-87	0.257735
Lig1	5.52372	4.60537	3.51571	3.63237	3.09956	6.61617	1.09318	4.00251	1.17051e-18	1.48066e-17	2.13343
Limch1	168.805	170.502	131.129	137.464	49.2704	85.848	0.801045	8.7383	3.04306e-264	5.1315e-262	1.74236
Limk1	10.3021	11.0401	15.2012	10.1663	8.45504	13.2977	0.653116	5.20973	1.05708e-16	1.20803e-15	1.57256
Lipa	20.194	19.2327	16.8776	17.3319	15.7927	27.7759	0.814447	6.05828	4.57258e-44	1.23801e-42	1.75862
Lipe	34.3423	35.2593	51.9283	40.9765	35.3324	54.3862	0.622205	7.20749	2.15109e-57	7.30074e-56	1.53923
Lipg	23.239	23.0589	48.0431	38.1016	40.2802	23.2509	-0.792714	6.86808	6.03497e-78	2.76164e-76	0.577257
Lix1l	18.9095	17.5399	30.2602	29.2553	39.065	21.652	-0.851264	6.20575	2.59334e-57	8.7878e-56	0.554299
Lman2l	14.8318	15.7494	9.81365	10.1082	7.79303	13.8755	0.831924	4.63419	1.32815e-17	1.5797e-16	1.78006
Lmbr1l	13.2052	12.2895	22.798	19.509	23.9756	15.2249	-0.654983	5.37323	9.94394e-20	1.31863e-18	0.635083
Lmcd1	16.3221	18.7304	54.4655	40.7742	25.3318	13.2535	-0.934284	5.00939	5.35781e-30	1.02266e-28	0.523302
Lmnb1	8.78972	7.67025	31.6401	30.7639	17.0814	11.3577	-0.588613	5.30595	1.16969e-15	1.25753e-14	0.664982
Lmo2	40.9787	44.8881	29.0025	26.5636	21.5882	40.7018	0.914665	5.72679	1.61306e-42	4.21798e-41	1.88513
Lox	24.5711	28.0328	96.6862	78.5854	136.389	69.1252	-0.980415	8.48083	0	0	0.506834
Lpgat1	10.2779	12.4512	19.8103	20.959	16.6128	9.184	-0.855007	6.46403	8.36655e-69	3.39996e-67	0.552863
Lpl	34.1356	49.7473	69.366	89.5779	180.028	106.772	-0.75368	9.14115	0	0	0.593089
Lrat	8.68013	10.8611	3.34423	6.29767	0.300071	3.14455	0.912748	4.74137	8.65401e-21	3.09406e-19	1.88263
Lrfn4	12.7138	11.6054	16.2486	15.1774	18.2106	11.4447	-0.669947	5.39964	5.29691e-21	7.51748e-20	0.62853
Lrg1	65.2476	52.7297	544.486	392.226	573.135	342.138	-0.744285	9.23439	0	0	0.596964
Lrig1	8.20717	7.0988	11.5131	7.11377	7.962	5.23339	-0.694429	5.4891	2.17677e-22	8.38446e-21	0.617954
Lrp2	3.6132	3.01953	2.49631	2.51178	1.57237	3.3008	1.06957	5.29004	7.06311e-42	1.82685e-40	2.09881
Lrrc1	14.9629	12.6915	6.08284	6.76594	5.84612	9.44452	0.691704	4.60423	1.29024e-12	1.17034e-11	1.61519
Lrrc61	16.2944	17.8359	13.8404	15.5394	13.2531	20.8216	0.651615	5.66572	3.0614e-22	4.58803e-21	1.57093
Lrrc8a	54.041	49.5069	104.95	76.5717	77.284	45.7394	-0.756705	7.99113	8.5712e-153	7.94635e-151	0.591847
Lrrk2	8.90505	10.0414	13.0844	11.9092	4.80429	7.88844	0.715278	5.74407	1.29308e-27	2.31737e-26	1.6418
Lrrn4	22.1707	20.767	6.72725	9.18007	3.60672	11.4167	1.66162	4.78471	9.98753e-63	3.74594e-61	3.16373
Ltbp4	284.579	275.952	252.266	198.043	139.581	87.2212	-0.678344	9.19517	9.84453e-281	1.75692e-278	0.624882
Ltf	5.83828	5.69682	11.2022	26.4878	30.3619	19.2912	1.24126	5.76095	9.52602e-70	1.13972e-67	2.36406
Ly6c2	44.9973	47.4473	87.0085	101.578	133.794	210.243	0.652004	7.14044	6.04247e-60	2.13189e-58	1.57135
Ly6i	4.03018	3.68293	12.6472	22.9227	41.5144	116.134	1.48386	6.18464	5.41213e-135	4.44085e-133	2.79696
Lynx1	14.3629	14.1877	8.4746	9.43965	6.34202	11.2979	0.83279	5.1663	9.10761e-25	1.50237e-23	1.78113
Lypd2	54.7639	44.9595	77.8498	40.122	28.7305	24.4481	-0.955927	4.80143	8.9565e-26	3.98779e-24	0.51551
Lyve1	93.6907	119.638	284.947	242.433	325.674	88.9511	-1.8723	8.98634	0	0	0.273138
Mab21l3	0.147206	0.0921869	7.69701	5.56163	6.14377	1.24401	-2.30161	3.60876	4.69243e-56	1.57513e-54	0.202837
Maf	18.6708	20.4498	9.87329	12.6414	12.3332	20.5964	0.739718	5.94451	1.60694e-33	3.39725e-32	1.66985
Maff	24.5611	25.1496	226.411	128.257	98.5722	65.7857	-0.819874	8.26874	8.36593e-205	3.08905e-202	0.566491
Magt1	14.1373	18.4107	10.2136	15.9191	12.4356	17.2366	0.640144	5.92293	7.46525e-24	3.06275e-22	1.55848
Malt1	3.56873	4.21846	17.9681	17.3646	28.9399	18.3549	-0.656839	6.85255	2.30338e-53	7.39568e-52	0.634267
Map2k3	31.0902	29.8666	77.8475	69.7353	69.1308	40.3537	-0.77656	6.84808	7.59113e-74	3.31103e-72	0.583757
Map3k14	6.04295	6.62462	17.3071	10.4777	13.4101	8.31466	-0.723896	5.81329	6.90488e-30	3.61552e-28	0.60546
Map3k15	6.3229	7.45711	7.27723	11.4212	7.51458	7.57733	0.650074	5.38359	1.89308e-17	5.74253e-16	1.56925
Map3k6	17.8312	25.862	81.0029	58.1805	42.401	23.9364	-0.824833	7.12311	3.08701e-100	1.8014e-98	0.564548
Map3k8	4.59268	3.9967	36.459	29.2594	27.8218	10.4585	-1.41121	5.51202	3.69739e-89	1.90344e-87	0.375995
Map4k4	48.4292	47.7141	56.5859	55.8605	78.1753	41.995	-0.896468	8.39286	2.78928e-282	5.06231e-280	0.5372
Mapkbp1	12.9512	14.0239	21.9777	11.6038	21.4451	14.8582	-0.921359	6.80842	3.29247e-95	5.42396e-93	0.528011
Mapt	58.5096	59.0026	44.4342	42.0997	16.9613	31.9121	0.91178	7.08646	4.32218e-109	2.75487e-107	1.88137
Marcks	50.8989	82.1038	86.028	94.9925	177.225	85.4684	-1.0521	9.0474	0	0	0.482265
Mast4	8.06562	8.81113	6.96526	7.06015	7.87754	3.94705	-0.996804	5.92646	3.00832e-62	1.11657e-60	0.501109
Mchr1	0.727557	0.848455	0.50852	0.420242	2.24925	0.359204	-2.63168	1.39439	1.75726e-15	1.87698e-14	0.161356
Mcm2	7.6351	6.19327	4.55641	6.67181	4.87215	11.0309	1.17844	4.80329	7.72249e-36	1.75941e-34	2.26332
Mcm5	4.86233	3.70451	3.47924	4.97886	4.44842	8.14671	0.872506	4.47442	2.85493e-17	3.33922e-16	1.83084
Mcoln2	0.588957	0.699638	3.62616	4.6199	15.3618	2.01399	-2.92882	4.32628	1.63372e-128	1.25856e-126	0.131322
Mctp2	0.445546	0.743496	1.64117	2.40127	2.86676	0.844173	-1.76179	3.33725	1.52524e-30	2.9534e-29	0.294883
Mdfi	6.6648	6.19455	4.80701	6.75829	14.7499	7.07354	-1.0596	4.16322	1.25638e-21	1.82914e-20	0.479766
Med13l	12.9946	12.6997	23.2564	22.9995	21.7664	13.8301	-0.654255	7.33497	2.70365e-73	1.16737e-71	0.635404
Meis1	15.4605	13.6392	6.57864	9.32687	7.2672	14.6226	1.00844	5.28627	8.34019e-38	2.00464e-36	2.01174
Metrnl	4.40985	4.03662	11.1214	9.62129	17.3422	10.9971	-0.656976	5.09268	1.34653e-16	1.5274e-15	0.634206
Mettl7a1	242.485	247.076	174.115	137.109	49.3782	95.3803	0.949745	7.13913	3.7913e-122	2.76172e-120	1.93153
Mfap2	64.3071	50.5182	49.1701	43.2105	20.929	35.2839	0.75325	4.96292	3.05218e-18	3.76096e-17	1.68559
Mfap4	397.68	371.39	390.667	611.839	231.211	221.634	0.647202	9.60513	2.36607e-297	1.40755e-294	1.56613
Mfap5	23.5797	21.6397	11.5495	17.9701	4.70928	10.9816	1.2203	3.52807	1.46735e-16	1.66093e-15	2.32995
Mfsd2a	1.03394	0.668242	7.57431	1.57256	1.14573	0.622879	-2.26445	3.17671	3.37156e-39	2.28498e-37	0.208128
Mgp	1487.7	1103.17	1155.94	1120.22	647.53	1444.54	1.15757	9.34944	0	0	2.23082
Micall2	2.41722	2.189	9.2906	8.68308	10.5002	4.10436	-1.35456	4.54078	4.75487e-43	1.25407e-41	0.391053
Mid1	9.85145	11.4231	21.8883	16.8354	16.879	9.19709	-0.875804	5.64821	1.86134e-40	4.69522e-39	0.54495
Mitd1	6.31337	6.28627	5.9239	6.24561	11.4084	19.347	0.761597	4.27965	3.47869e-12	3.06331e-11	1.69537
Mki67	1.30331	1.86919	2.08158	3.73152	2.78302	3.37985	0.841763	4.921	2.73164e-20	9.49689e-19	1.79224
Mlkl	3.28672	3.04549	5.54585	8.59273	15.3983	27.7764	0.850845	5.24317	4.50252e-27	7.95593e-26	1.80356
Mllt3	4.60565	5.12036	3.67345	4.00347	2.47187	4.8175	0.962231	4.52648	3.92078e-21	5.59783e-20	1.94832
Mlph	7.55525	7.71693	13.6035	13.1303	18.7324	11.0877	-0.75646	6.02248	2.6248e-40	6.58228e-39	0.591947
Mme	10.6596	13.4855	8.17533	9.02609	5.43894	8.4332	0.63254	4.91124	4.07718e-13	3.83979e-12	1.55029
Mmp25	0.756554	0.890667	4.40744	6.58201	6.66734	3.82563	-0.800948	4.10236	1.20513e-12	1.09686e-11	0.573972
Mmp28	13.0109	15.7589	12.1705	9.56496	4.97769	9.11252	0.871819	4.06984	2.12419e-13	2.03543e-12	1.82997
Mmp3	11.1319	13.0642	30.5642	24.2641	28.1329	13.0049	-1.11288	5.15187	2.49367e-45	6.94465e-44	0.46237
Mmp8	0.604564	1.25588	76.0054	118.725	21.7867	7.21386	0.643421	7.93798	6.78535e-94	1.10087e-91	1.56203
Mmrn2	24.0983	20.657	17.4649	18.5846	13.7303	23.1317	0.752402	6.21915	2.51052e-42	6.54079e-41	1.68459
Mndal	14.3513	14.7693	13.7068	20.9432	19.4334	33.6881	0.611394	5.08302	5.22506e-13	1.15838e-11	1.52773
Mov10	9.02184	7.7207	14.4566	13.3024	12.2159	20.4441	0.742801	5.91124	6.11268e-33	1.27468e-31	1.67342
Mpeg1	18.2171	18.5699	26.6556	41.335	57.8237	175.883	0.632879	7.24112	8.38981e-57	8.39608e-55	1.55066
Mpzl2	1.66273	1.84952	2.87749	2.29674	4.0573	1.87773	-1.11028	3.19573	8.08803e-13	7.44043e-12	0.463203
Mrc2	59.8975	55.3412	30.2577	35.2551	9.12392	17.1643	0.911557	6.29942	6.24949e-64	2.38572e-62	1.88107
Ms4a1	7.10297	8.12361	2.57994	3.84888	0.66904	2.73413	2.02325	1.89772	1.04426e-12	9.53274e-12	4.06498
Ms4a4c	1.87871	1.78798	0.825024	3.86678	3.05682	8.90645	2.22028	2.12392	2.10401e-15	5.5905e-14	4.65982
Ms4a6c	5.16178	5.98637	6.29279	12.9888	15.431	24.3763	1.04483	4.21086	1.77235e-18	5.62319e-17	2.06312
Ms4a6d	1.36155	1.29891	4.0058	5.21155	10.1016	19.4939	0.947952	4.39089	8.49319e-19	1.08203e-17	1.92913
Mt1	63.0613	54.3905	2193.96	1029.87	1473.48	389.003	-1.09106	9.7059	0	0	0.469416
Mt2	18.5888	19.4995	1524.98	928.253	1549.78	466.384	-0.716185	9.37014	0	0	0.608705
Mtap1a	2.78891	2.85882	1.94597	2.0533	2.26509	4.06874	0.844783	5.27014	2.50157e-27	4.45704e-26	1.79599
Mtap7	8.9018	11.1071	11.0687	11.0026	11.5909	7.71336	-0.587402	5.20075	1.68041e-14	1.70881e-13	0.66554
Mvd	8.57358	6.78037	13.534	11.8328	37.6954	24.1511	-0.642187	5.81446	2.43658e-25	4.08628e-24	0.640741
Mx1	1.25846	0.960304	1.06213	3.28739	3.71295	9.86002	1.62653	2.68782	4.02178e-14	9.80984e-13	3.08768
Mxra7	35.0029	40.616	21.6678	24.5078	15.1599	32.9349	1.11907	5.4307	6.61036e-50	1.98552e-48	2.17207
Mybbp1a	21.1765	21.1735	29.197	28.7063	46.4323	30.2507	-0.618121	7.26918	1.02763e-62	3.8475e-61	0.651519
Myc	4.2168	4.89377	51.4685	31.2404	31.3401	11.5055	-0.720196	6.58864	1.47663e-50	1.29605e-48	0.607015
Myh10	50.2713	49.2329	32.5367	31.8078	10.41	19.2577	0.887392	6.89679	4.31536e-91	2.31623e-89	1.84983
Myl9	99.5071	74.048	109.796	86.4461	39.4676	67.4765	0.77358	5.89586	4.0734e-35	9.08891e-34	1.70951
Mylk	84.0912	88.2578	64.6274	65.9494	31.5062	53.6624	0.768252	8.4173	1.34876e-195	1.66966e-193	1.70321
Myof	22.972	20.3046	21.0131	22.1765	18.8251	28.5842	0.602526	7.42536	1.58222e-62	5.893e-61	1.51837
Myrip	4.51854	5.13486	19.1683	10.489	10.7422	4.2675	-0.869704	6.08935	9.41761e-51	8.2999e-49	0.547259
Naaa	16.2599	16.1914	11.9339	14.2752	12.7946	20.1873	0.657748	5.35535	1.68977e-18	2.11255e-17	1.57762
Nbeal2	18.5403	15.3377	18.503	19.3129	12.2066	18.6541	0.611787	7.11782	2.43188e-52	7.68158e-51	1.52815
Ncald	26.8047	27.7003	10.4727	14.0973	6.78447	14.3373	1.07917	5.35355	1.85409e-44	5.0647e-43	2.11282
Nceh1	12.5876	14.157	8.36602	10.2802	8.73805	13.1393	0.588388	5.61779	5.17237e-18	6.30817e-17	1.50357
Nckap5	29.0448	31.2806	16.5965	19.5092	8.56735	20.5879	1.26475	6.77902	2.15512e-163	2.08842e-161	2.40285
Ndrg1	12.4147	12.6479	20.1462	19.5375	27.7577	13.7915	-1.00894	5.85446	1.38461e-60	4.99206e-59	0.496913
Ndufa3	56.5498	47.1136	66.6299	57.6679	47.2242	82.2561	0.800234	4.5392	1.96006e-15	2.08632e-14	1.74138
Nek2	3.64432	3.44503	10.1094	9.0123	7.69657	3.83448	-1.00461	4.15084	1.41236e-19	1.8671e-18	0.498405
Neo1	15.2808	14.9235	10.989	12.0156	5.15187	8.41557	0.707823	5.68374	3.88296e-26	6.67932e-25	1.63334
Neurl2	11.999	9.85819	10.1926	6.89048	4.70463	10.2857	1.12708	3.17142	9.37541e-12	8.0539e-11	2.18417
Nexn	9.77097	13.9355	6.20699	10.4656	5.15598	7.72817	0.7533	4.46189	1.33915e-12	2.85365e-11	1.68564
Nfkb2	22.3026	19.9399	123.367	86.05	105.364	67.7684	-0.636676	8.08185	2.32204e-115	1.58372e-113	0.643193
Nfkbia	184.663	168.34	1928.55	1294.1	974.522	475.336	-1.03574	10.1061	0	0	0.487766
Nfkbib	14.8251	12.0116	63.4822	41.4602	47.0099	32.7629	-0.614561	6.63575	2.42225e-38	1.61102e-36	0.653129
Nfkbid	2.60583	2.09379	41.0863	21.9691	24.2543	19.8983	-0.903021	5.93128	5.22669e-49	4.40688e-47	0.534766
Nfkbiz	8.19081	9.04548	194.204	131.214	63.4356	31.3386	-1.0173	7.45944	2.97768e-191	3.58259e-189	0.494042
Ngfrap1	36.0585	30.0832	34.1273	36.1701	36.053	55.5086	0.622448	5.45693	7.12229e-18	8.61756e-17	1.53949
Ngp	2.2688	4.69513	25.7662	112.893	175.298	8.49522	2.13101	6.43731	4.55758e-265	2.07671e-262	4.38024
Nipal3	32.5778	31.9669	25.1363	22.5972	12.571	20.3742	0.696553	6.40747	1.49585e-41	3.83196e-40	1.62063
Nkg7	10.7574	9.31477	8.04477	8.78847	5.14121	18.8755	1.8739	3.37323	1.75903e-29	3.30742e-28	3.66522
Nlrc5	4.37683	3.83461	4.84017	10.5412	18.5781	37.1718	1.12266	5.80283	3.13992e-60	3.2643e-58	2.17749
Nlrp3	0.968611	1.40318	48.3301	32.1159	40.412	36.4959	-0.589595	7.30154	3.55268e-55	3.41185e-53	0.664529
Nnat	18.553	20.2716	33.1837	26.0452	74.667	34.9581	-1.09467	5.99387	1.1504e-77	5.24191e-76	0.468244
Nol10	3.25017	4.06617	6.1766	6.43309	9.21766	5.00038	-0.881933	4.36074	9.35437e-18	1.1242e-16	0.54264
Nol3	8.20683	6.90381	5.00972	7.14958	3.33151	10.7609	1.69053	4.41698	3.00748e-50	9.14888e-49	3.22775
Nolc1	12.2344	11.5986	17.5563	16.4448	27.9007	16.0052	-0.801657	6.27585	1.94856e-53	6.26582e-52	0.57369
Nop14	8.11562	8.05213	10.843	9.77034	13.4687	8.5271	-0.659259	4.85764	1.80636e-14	1.83516e-13	0.633203
Nop56	8.41886	8.43476	12.6942	9.3983	18.2081	11.9396	-0.608609	4.80329	4.22589e-12	3.70301e-11	0.655829
Nop58	8.39276	10.6333	25.2826	22.4692	23.4844	14.2715	-0.718368	5.18261	1.21096e-20	1.68731e-19	0.607785
Nos2	2.08889	1.79257	1.06729	3.1695	13.05	18.673	1.56795	3.16369	3.82436e-18	1.19044e-16	2.96482
Nox4	9.72583	12.3828	8.50449	9.69905	4.01889	6.77458	0.752929	4.27965	5.88263e-12	5.115e-11	1.68521
Noxo1	3.51598	3.05066	12.5124	8.99289	15.8776	10.2744	-0.627725	4.83718	4.61197e-13	4.32633e-12	0.647196
Nr1d1	73.4265	62.6679	65.2898	75.7754	74.2709	35.6926	-1.05709	7.11861	2.1428e-163	2.08592e-161	0.480599
Nr4a1	48.6935	50.8095	85.9602	52.5067	51.0242	24.1363	-0.711121	7.3782	5.38811e-84	7.74442e-82	0.610846
Nr4a3	3.72566	5.03423	16.9585	7.48089	7.80655	2.91183	-1.18012	4.45478	4.00436e-30	2.11747e-28	0.441314
Nrcam	2.79826	2.50727	1.13254	1.77211	0.423551	1.32081	1.63785	2.80065	1.69388e-16	1.90727e-15	3.11201
Nrg2	6.85759	6.43156	1.59194	1.50163	1.15348	3.38746	1.55138	2.75774	8.25997e-15	8.52098e-14	2.93098
Nt5dc2	36.4861	28.581	25.1963	27.7241	11.4048	25.1633	1.14121	4.74544	9.27891e-33	1.92555e-31	2.20566
Nt5e	20.4334	17.4881	22.4478	25.3019	23.9421	14.6082	-0.712662	6.07039	4.32901e-37	1.01322e-35	0.610193
Ntrk2	3.06867	2.7301	2.25495	3.30116	4.19175	9.33637	1.15504	5.62377	4.01643e-60	1.42647e-58	2.22691
Nuak2	7.79771	7.71566	66.2032	41.1702	34.5644	29.9964	-0.685257	7.35191	1.08208e-76	1.41304e-74	0.621895
Nup62-il4i1	8.43782	6.08514	91.8945	55.8113	99.8557	37.7022	-0.719375	7.36452	3.87076e-85	5.67783e-83	0.607361
Nupr1	91.9443	92.225	219.014	198.736	369.898	153.684	-1.26707	7.29074	1.45933e-263	2.44165e-261	0.415502
O3far1	6.77024	7.15175	17.2689	12.8198	15.3228	8.00649	-0.935834	3.97234	2.40033e-15	2.54735e-14	0.52274
Oas1a	4.25487	4.29457	3.52952	9.43314	12.3055	30.2379	1.41684	3.69085	6.05104e-22	2.2815e-20	2.67001
Oas1g	2.32552	1.73758	2.13672	6.49064	5.94418	17.2245	1.60058	3.18961	3.51695e-19	1.15167e-17	3.03265
Oas2	3.02943	3.70621	4.93273	9.87943	12.5723	23.5626	1.00164	4.89629	4.93911e-27	2.32475e-25	2.00228
Oas3	1.48193	1.5727	7.1379	11.2824	11.8368	27.0711	0.660333	5.48038	5.86194e-19	1.90211e-17	1.58045
Oasl1	2.31113	2.39541	5.43123	7.13543	12.3928	22.8651	0.883395	5.27204	1.71399e-29	3.22839e-28	1.84471
Oasl2	23.3264	22.5486	23.2071	48.6116	94.1082	195.347	1.06663	6.87615	1.45927e-118	3.15674e-116	2.09453
Odc1	10.9445	9.93062	33.344	27.9283	33.4727	11.3253	-1.56311	5.75502	1.24091e-126	9.3906e-125	0.338421
Ogn	53.9191	87.618	51.5979	59.9611	11.0615	18.0863	0.709162	5.24705	9.47661e-20	1.25822e-18	1.63485
Olfm4	0.0686943	0.0717847	2.78467	3.00318	4.18839	0.788485	-2.40047	1.91735	2.54411e-19	3.32832e-18	0.189403
Olfml1	8.0607	7.41876	3.66623	5.24631	1.62881	4.93892	1.59745	2.76859	1.28587e-15	1.37967e-14	3.02608
Olfml3	84.7794	74.5711	58.7974	68.1338	26.5004	59.6384	1.17006	6.28296	9.69985e-101	5.70692e-99	2.25021
Orm3	0.500292	0.399593	5.1899	4.99815	28.6489	9.48106	-1.59408	3.80065	4.64594e-35	1.03428e-33	0.331233
Osgin1	9.64491	11.7479	51.3278	31.254	34.4595	38.9803	-0.715602	6.29584	4.60777e-41	3.23541e-39	0.608951
Osmr	13.1456	14.7872	84.7615	64.6357	65.0979	29.9133	-1.12177	7.78471	1.41201e-290	2.6526e-288	0.459529
Osr1	5.34384	6.71249	8.98722	9.81603	24.6974	12.3048	-1.00485	5.16425	8.65058e-38	2.07459e-36	0.498321
Ostc	34.2225	36.8125	22.5351	31.2198	34.9682	53.1489	0.603868	5.5798	2.29487e-18	2.84251e-17	1.51979
Oxct1	22.0789	24.958	19.7498	21.302	9.95863	18.2613	0.874584	5.66354	1.36476e-37	3.25113e-36	1.83348
P2rx7	8.35436	7.75007	4.27809	4.58065	3.99216	7.2047	0.851452	4.83072	8.55875e-21	1.20114e-19	1.80432
P2ry2	7.04454	5.21326	40.8081	29.9041	40.8914	20.1509	-1.02084	6.46278	1.96215e-97	1.11168e-95	0.492831
P2ry6	11.0815	9.05593	26.672	17.1696	26.9531	21.6087	-0.635303	5.35429	1.54624e-17	4.71713e-16	0.643805
Pak3	0.210292	0.308743	0.308146	0.515628	0.644497	0.155431	-2.04399	1.68517	1.71543e-13	1.65709e-12	0.242493
Pak6	4.85007	7.97144	13.5071	5.75142	13.4161	9.57868	-1.23137	5.24319	5.0703e-55	4.84757e-53	0.425914
Palm	21.5874	20.5591	14.3086	19.1145	13.4256	30.1555	1.16721	5.91063	3.85925e-74	1.69018e-72	2.24577
Palmd	21.2489	21.4647	12.0835	12.2166	8.05548	15.8598	0.976972	4.88905	1.52758e-27	2.73306e-26	1.96833
Pappa	0.243846	0.303646	0.609904	0.748611	3.07719	1.57968	-0.961585	4.63122	1.40059e-24	2.28447e-23	0.513492
Papss1	24.0137	21.9991	13.7828	15.8888	12.1266	20.0613	0.726065	5.42471	4.46309e-23	6.93626e-22	1.65412
Paqr4	21.3844	18.8959	11.219	14.8613	10.2713	16.8174	0.711115	5.12258	2.51343e-18	3.10783e-17	1.63707
Parp1	15.5482	13.5023	9.36378	9.68493	8.38809	13.4848	0.684756	5.423	9.28988e-21	1.3029e-19	1.60743
Parp11	5.72649	5.1083	3.39582	5.14526	8.23599	15.1198	0.876212	5.48761	1.53752e-33	3.25694e-32	1.83555
Parp12	17.6808	19.0102	13.3708	21.4168	39.2495	59.7164	0.679528	5.85167	2.5854e-25	1.13461e-23	1.60162
Parp16	2.73858	2.81124	10.93	6.08433	3.87246	3.58252	-0.844682	4.34951	1.75819e-15	4.68909e-14	0.556833
Pawr	15.6541	15.9803	35.8653	27.6411	36.3094	19.0313	-0.931778	5.61102	2.11525e-44	5.7634e-43	0.524212
Pccb	29.4297	26.5516	23.2331	23.0239	13.1378	21.2989	0.69688	5.33816	2.36367e-20	3.24698e-19	1.621
Pcdh12	14.6629	14.1963	4.73615	6.56491	3.01137	7.30713	1.27839	4.91246	2.73345e-44	7.43831e-43	2.42569
Pcdh18	8.05078	8.32678	3.64036	5.85527	4.22979	8.22052	0.685349	4.65719	3.62927e-12	7.43775e-11	1.60809
Pcdha10	3.51399	4.01191	3.13013	5.37676	0.884687	1.52995	0.780131	4.52433	8.33912e-14	1.97556e-12	1.71729
Pcdha11	3.35991	3.94454	3.0995	5.31855	0.882666	1.51768	0.778611	4.51239	1.0781e-13	2.50964e-12	1.71548
Pcdha12	3.38599	3.96637	3.14645	5.33692	0.893556	1.52645	0.761906	4.52263	3.03156e-13	6.84852e-12	1.69573
Pcdha1	3.36375	3.94905	3.10304	5.32464	0.894578	1.51942	0.778611	4.51239	1.0781e-13	2.50964e-12	1.71548
Pcdha2	3.29101	3.86365	3.03594	5.21848	0.864565	1.48656	0.781099	4.51411	8.53579e-14	2.01546e-12	1.71844
Pcdha3	3.40677	3.96629	3.12552	5.34296	0.897657	1.53346	0.773161	4.51411	1.45818e-13	3.37239e-12	1.70901
Pcdha4	3.33243	3.97675	3.0599	5.26873	0.871388	1.50695	0.783583	4.51581	6.75344e-14	1.616e-12	1.7214
Pcdha5	3.47512	3.99192	3.15177	5.38613	0.890805	1.60248	0.772704	4.51922	1.23884e-13	2.87754e-12	1.70847
Pcdha6	3.37806	3.95357	3.10659	5.33073	0.884687	1.52116	0.778611	4.51239	1.0781e-13	2.50964e-12	1.71548
Pcdha7	3.38503	3.98503	3.14633	5.36758	0.889267	1.5467	0.77022	4.51752	1.56206e-13	3.60099e-12	1.70553
Pcdha8	3.50354	3.96451	3.11836	5.33073	0.884687	1.52116	0.773161	4.51411	1.45818e-13	3.37239e-12	1.70901
Pcdha9	3.31031	3.93039	3.04901	5.24096	0.868289	1.55335	0.781099	4.51411	8.53579e-14	2.01546e-12	1.71844
Pcdhac1	3.45229	4.01793	3.14479	5.43128	0.908077	1.51435	0.787945	4.55123	2.14409e-14	5.31456e-13	1.72661
Pcdhac2	6.70818	6.29024	5.26701	8.21542	1.68897	2.7708	0.641159	5.22972	2.24703e-15	5.95575e-14	1.55958
Pck1	7.59667	13.0008	2.57088	1.84584	0.482333	2.90723	2.5823	2.25479	4.20496e-22	6.2537e-21	5.98896
Pcolce	156.838	147.687	102.63	117.493	51.6786	78.7985	0.608541	6.68159	9.89183e-39	2.4128e-37	1.52472
Pcp4l1	40.007	37.117	30.3099	22.7362	8.53892	16.0036	0.905788	4.31892	9.94052e-17	1.13721e-15	1.87357
Pctp	6.49516	6.56746	4.6638	5.70617	3.16569	7.03776	1.15136	3.38737	6.52332e-14	6.43201e-13	2.22123
Pcx	20.8663	20.0383	32.9635	21.9652	20.1257	22.8269	-0.585593	6.79617	7.48954e-39	5.02809e-37	0.666375
Pdcd4	15.8242	20.9512	18.0084	18.7611	16.8726	11.1673	-0.595225	5.05108	1.48191e-13	1.43995e-12	0.661941
Pde12	4.87023	5.17389	17.5294	11.4053	7.75072	6.55494	-0.619947	5.63614	5.40562e-20	1.85822e-18	0.650695
Pde1b	3.85133	3.40486	8.08077	8.44677	13.6755	8.62633	-0.664576	5.00596	4.43696e-16	4.87542e-15	0.630874
Pde2a	5.65741	4.50789	11.4	8.97739	9.49153	4.77193	-0.991721	4.85891	3.05784e-30	5.86274e-29	0.502878
Pde4b	18.322	19.3702	77.7166	71.5744	41.4434	26.2687	-0.657752	7.17397	1.97109e-66	7.68903e-65	0.633865
Pde5a	32.5561	35.0215	16.5279	20.521	5.49414	9.99191	0.862696	5.7475	9.07914e-39	2.21709e-37	1.81843
Pdgfd	6.32279	6.57243	4.7775	4.92146	1.94608	7.13745	1.87192	3.11304	1.37992e-24	2.25418e-23	3.6602
Pdia3	87.0761	110.608	82.31	98.4873	77.8773	140.927	0.855647	8.21928	6.97046e-210	9.21478e-208	1.80957
Pdia4	46.0326	48.6499	31.5712	41.0807	26.7066	58.6667	1.13523	6.78371	5.22103e-134	4.25147e-132	2.19653
Pdia5	10.4099	8.63498	5.49056	5.0701	3.95524	8.61038	1.12125	3.56276	8.99932e-15	9.25694e-14	2.17536
Pdia6	77.024	76.006	57.6405	70.6266	65.0257	113.117	0.798687	7.60574	6.80491e-121	4.85779e-119	1.73952
Pdk4	6.31879	9.39549	21.666	18.3225	15.8915	5.21811	-1.60613	5.10664	2.70161e-85	1.3393e-83	0.328478
Pdlim7	21.2966	17.212	60.238	44.0569	51.6463	29.5036	-0.807699	6.68839	1.31446e-71	5.54143e-70	0.571292
Pdzk1ip1	11.6062	7.40182	19.0127	11.2441	19.5646	6.98118	-1.48556	3.82943	9.17378e-32	1.84302e-30	0.357111
Pdzrn3	12.1756	11.393	10.4849	10.2961	6.11809	10.3355	0.756228	5.11728	2.94877e-20	4.02491e-19	1.68907
Pear1	23.3095	21.6605	29.7891	24.6919	32.1744	21.3437	-0.592049	6.88032	1.99452e-44	5.44135e-43	0.6634
Peg3	3.33941	3.65971	3.39882	4.59009	4.66481	2.42103	-0.945774	4.50231	6.50333e-22	9.57877e-21	0.519151
Pepd	20.442	17.0749	13.3148	13.4656	10.8705	17.6308	0.697406	4.7591	4.90817e-14	4.87087e-13	1.62159
Perp	9.75262	10.5857	15.6471	15.7739	14.6369	4.24529	-1.78444	4.0764	9.42661e-51	2.90894e-49	0.29029
Pfkm	11.4396	10.4351	6.76798	7.59144	3.79559	7.21618	0.926303	4.03432	1.57249e-14	1.59983e-13	1.9004
Pgap2	37.3945	32.8192	24.6824	21.784	21.0436	35.8557	0.768584	5.09914	1.28486e-20	1.78679e-19	1.7036
Pgf	2.60461	3.02343	8.02063	8.12161	27.68	15.0664	-0.87724	5.02078	6.83677e-27	1.20309e-25	0.544408
Phkb	5.7883	7.48635	4.42211	4.64133	2.61547	4.62107	0.820654	4.1045	2.37388e-12	2.10863e-11	1.76621
Phlda1	42.1992	41.336	273.726	161.006	95.596	56.8337	-0.765601	8.68327	2.16129e-237	9.07571e-235	0.588208
Pi15	1.54437	3.20344	5.82657	8.69962	2.83521	1.3448	-1.07527	3.79801	1.69663e-17	2.01191e-16	0.474583
Pim3	58.6441	70.2059	230.403	150.577	136.288	58.9323	-0.613645	8.8106	1.87151e-166	5.64511e-164	0.653543
Pkn3	13.4753	13.4493	7.1973	8.26609	5.95494	10.6433	0.837428	4.64747	5.80953e-18	7.05711e-17	1.78686
Pknox2	9.70431	8.84968	10.795	13.1605	7.80231	13.7136	0.813417	5.273	1.56343e-25	2.64056e-24	1.75737
Pla2g12a	11.3666	11.6253	20.493	15.3777	16.0418	7.89531	-1.02218	4.15084	3.36445e-20	4.58062e-19	0.492372
Pla2g15	21.5842	19.5691	9.41393	11.7354	13.0893	21.4548	0.712756	5.58364	9.42696e-25	1.5506e-23	1.63893
Pla2g16	6.58221	6.17024	4.81498	5.65798	6.25353	12.2551	0.970328	5.0764	1.17844e-30	2.28808e-29	1.95929
Plac8	18.3936	12.0891	18.7013	34.2556	53.9321	99.5674	0.872673	4.25449	3.95351e-14	9.65432e-13	1.83105
Plat	18.8677	20.106	53.3685	46.6951	49.602	23.7299	-1.06357	6.48062	6.1596e-107	3.84589e-105	0.478446
Plaur	31.5709	26.663	298.384	203.123	109.721	63.8	-0.782143	6.87844	1.8957e-76	8.547e-75	0.581503
Plbd1	12.0111	11.2057	12.5299	21.0252	18.8417	30.1109	0.746501	5.09336	1.9595e-18	6.2078e-17	1.67772
Plcb2	4.11826	4.39965	3.23709	3.78985	2.86973	4.91698	0.776462	4.36432	3.01281e-13	2.86638e-12	1.71293
Plcb4	7.43894	7.58606	14.4002	12.7316	12.1662	6.46521	-0.911833	5.05552	1.67483e-29	3.16018e-28	0.531509
Plcg2	6.42196	6.12952	7.1897	8.76956	8.66698	15.9306	0.878026	5.76926	1.22377e-40	3.09059e-39	1.83786
Pld4	18.596	16.1698	11.2885	12.8098	14.8407	32.5192	1.13147	5.6065	4.11503e-57	1.38784e-55	2.19082
Plekha4	4.18427	4.47827	5.33379	4.13743	4.088	8.47121	1.05051	4.11516	7.66896e-19	9.79359e-18	2.07126
Plekha7	4.25917	3.61374	2.74682	3.10068	6.56887	3.45201	-0.927761	4.38385	1.12592e-19	1.4912e-18	0.525673
Plin1	4.67903	6.84577	1.99727	1.26089	0.628689	3.51247	2.47255	2.0916	9.9172e-19	1.26046e-17	5.55022
Plin4	4.58181	5.27191	5.79813	3.66485	2.59538	2.5144	-0.661569	4.7267	1.21721e-12	2.60939e-11	0.63219
Plk2	24.9323	18.9804	77.6156	58.2675	26.2498	40.4334	0.623175	6.57787	8.49248e-38	2.03896e-36	1.54026
Plk3	5.24642	5.78368	61.909	39.3284	31.4737	22.1528	-0.65452	6.8648	1.76009e-50	1.53228e-48	0.635287
Pllp	25.0579	27.1726	18.0236	17.0409	5.84739	13.7581	1.23368	4.27204	2.55915e-27	4.55205e-26	2.35167
Plod1	23.1433	22.9552	21.3552	21.5028	17.5423	30.703	0.807442	6.33543	3.3749e-52	1.06289e-50	1.75011
Plod3	34.1381	34.0281	34.7321	34.2135	33.3915	55.7456	0.739327	7.22925	8.67669e-81	4.075e-79	1.6694
Plscr1	14.6712	15.1709	80.5713	66.6277	45.6727	23.8241	-0.938778	6.16733	1.25143e-67	4.94478e-66	0.521675
Pltp	307.94	273.413	247.958	190.57	72.9315	127.867	0.809985	7.54434	4.46057e-119	3.13205e-117	1.75319
Plxna2	6.61415	8.07275	22.1099	18.6733	13.056	8.08365	-0.691574	6.82878	4.46687e-58	1.52816e-56	0.619178
Plxnc1	4.28419	4.97478	3.53762	4.83707	3.08704	6.95999	1.1725	5.20375	2.03791e-46	5.79601e-45	2.25402
Pmp22	251.562	236.418	207.109	222.127	101.726	156.133	0.618057	7.89168	5.48303e-90	2.89937e-88	1.53481
Pmvk	17.6212	16.4518	47.009	27.294	13.369	15.2574	-0.784158	5.41871	9.2214e-27	4.27458e-25	0.580691
Pnmal2	2.57817	3.11218	0.521243	1.39712	0.207686	1.54506	2.88118	1.97468	4.83238e-21	6.86731e-20	7.3675
Pnpla2	69.2694	64.5672	198.436	132.179	150.401	105.631	-0.586169	8.77529	2.70305e-148	7.42159e-146	0.666109
Podn	30.8422	25.5732	16.8015	20.4583	9.32023	15.3445	0.719102	5.32536	2.76803e-21	3.97854e-20	1.64616
Podxl	141.451	142.168	110.411	112.802	81.1765	178.895	1.13997	9.49421	0	0	2.20376
Pogk	3.45088	3.78675	6.37608	5.96458	6.60614	3.71962	-0.82843	5.20575	2.51232e-27	4.47247e-26	0.563142
Pold1	10.9348	9.12892	6.5933	7.61147	7.06934	11.1023	0.651007	4.9933	1.92414e-14	1.95111e-13	1.57026
Polm	7.99349	7.45131	11.1128	11.4837	13.9481	8.74336	-0.673599	5.01623	1.41223e-16	1.60023e-15	0.626941
Pon3	18.9744	21.3999	18.2202	18.3955	12.189	19.7848	0.698566	4.87029	4.2694e-15	4.46671e-14	1.62289
Por	164.397	157.565	284.22	184.445	144.008	130.817	-0.623805	9.13132	2.51308e-214	9.78547e-212	0.648957
Porcn	16.3936	15.1652	15.55	12.4985	28.1268	17.9113	-0.650922	5.41266	4.93853e-20	6.67278e-19	0.636873
Ppan	12.7457	9.02779	20.1167	14.5568	22.5321	13.3471	-0.755198	4.86524	1.73362e-18	2.16359e-17	0.592465
Ppl	22.4734	20.1457	31.0484	26.0931	35.4859	21.1256	-0.748213	7.43305	4.48374e-102	2.66733e-100	0.59534
Ppp1r10	18.0475	17.9271	34.8984	22.3851	20.8795	17.8808	-0.640567	6.89695	1.85863e-49	1.57954e-47	0.641461
Ppp1r13l	4.23894	4.10507	4.88754	3.57783	7.47744	4.3876	-0.768688	4.17346	2.46233e-12	2.18538e-11	0.586951
Ppp1r14a	112.058	105.809	69.8091	72.1636	33.4087	69.9416	1.06552	4.83202	1.15604e-30	2.24663e-29	2.09292
Ppp1r14c	25.79	33.8099	9.87283	12.161	5.46438	12.9071	1.23945	4.59664	3.68664e-34	7.97505e-33	2.36109
Ppp1r15a	25.4571	27.093	166.191	99.9913	54.2486	34.9918	-0.732944	8.23336	8.5701e-160	2.51421e-157	0.601675
Ppp1r16b	48.2066	43.9771	25.9357	27.5865	17.5538	36.625	1.06098	7.48966	2.08775e-191	2.52606e-189	2.08635
Ppp1r3c	5.23463	6.17306	5.69369	4.56352	2.95173	6.81932	1.20706	3.76859	4.29547e-19	5.53501e-18	2.30866
Ppt1	23.2414	24.7376	21.5485	24.0425	14.8044	27.8713	0.912578	5.78003	6.30638e-44	1.69883e-42	1.88241
Prdm6	13.8889	14.3766	6.99602	7.62651	3.60879	8.43308	1.22369	4.02982	3.89221e-23	6.05781e-22	2.33543
Prdx2	62.5266	59.5221	39.2855	40.4221	36.6895	60.1641	0.713376	5.54867	2.99017e-24	4.82937e-23	1.63964
Prdx6	287.525	318.713	516.746	443.699	494.844	309.888	-0.675218	9.83895	0	0	0.626237
Prdx6b	7.40058	7.78237	11.6568	9.43859	12.082	6.71525	-0.847021	4.71772	1.08445e-20	1.51597e-19	0.555931
Prf1	3.83094	3.84512	4.68552	4.2539	1.78425	6.46176	1.85384	3.16733	2.88907e-25	4.83755e-24	3.61461
Prickle1	39.7723	37.6896	23.0093	22.6348	17.5367	31.5479	0.847078	6.69124	1.37432e-72	5.8983e-71	1.79885
Prkar2b	5.86911	6.43926	4.70262	6.06533	2.21594	4.89922	1.1436	3.63567	6.68675e-16	7.29513e-15	2.20932
Prkcc	3.8028	3.15748	18.143	13.7119	4.80991	1.85164	-1.37547	3.0916	2.99314e-17	3.49135e-16	0.385426
Prkce	19.7952	20.4398	21.9224	20.3865	20.2374	13.4456	-0.589835	6.68696	8.8276e-39	2.15813e-37	0.664419
Proz	1.33846	1.38832	7.33107	3.26131	4.60622	2.23005	-1.1675	3.59714	6.36302e-17	1.86416e-15	0.445193
Prps2	10.4874	9.63232	6.08679	6.87191	3.17775	6.34588	0.997207	4.16527	8.61435e-18	1.0376e-16	1.99613
Prr5l	9.07248	5.55391	5.72874	7.72897	4.54229	7.1328	0.650786	4.68231	6.55943e-12	5.69423e-11	1.57002
Prr7	3.87141	4.69685	39.5003	27.1112	15.9891	2.78024	-2.52074	3.55964	1.25992e-61	4.65215e-60	0.174254
Prrt4	8.97854	10.5306	6.30735	6.03828	2.73344	7.47971	1.45131	4.19372	7.46984e-34	1.59655e-32	2.73456
Prss12	6.4665	4.89194	6.53044	5.22111	7.44122	4.04836	-0.877596	3.85764	6.43715e-13	5.9653e-12	0.544273
Prss22	0.0850896	0.666435	36.4286	25.9166	8.04019	0.872275	-3.19359	2.42899	1.55081e-39	3.85738e-38	0.109303
Psap	390.495	344.855	383.372	370.562	400.9	724.807	0.854347	10.5921	0	0	1.80794
Psat1	3.73914	3.42468	4.81157	7.06636	7.23123	13.0106	0.846995	4.58134	1.35976e-17	1.61601e-16	1.79875
Psd	6.40271	5.33361	41.3377	24.191	23.7968	11.3304	-0.772919	6.95067	4.14354e-74	5.18936e-72	0.585232
Psmb10	49.0108	38.5502	42.9309	66.5359	102.045	193.841	0.632019	6.15659	1.41258e-27	6.90681e-26	1.54973
Psmb8	46.009	34.4985	38.0251	63.2926	126.785	266.578	0.734956	5.99635	3.59457e-32	2.03654e-30	1.66435
Psmb9	38.3256	31.6184	26.7084	57.5406	74.3278	172.354	1.10691	5.14836	9.61119e-38	6.25633e-36	2.15384
Psme1	57.3693	57.018	62.5601	86.0947	115.079	188.687	0.713314	7.25044	1.44276e-76	6.5186e-75	1.63957
Psme2	23.5603	25.3846	29.2243	47.2918	67.9354	121.43	0.694201	5.14173	1.08242e-16	3.11157e-15	1.61799
Ptafr	2.38093	1.94476	24.671	15.5393	48.9811	56.8352	-0.666697	5.15276	9.22176e-17	2.66522e-15	0.629947
Ptbp2	3.56117	5.10376	5.94089	6.42748	6.90628	3.32911	-1.05213	4.04997	8.95095e-20	1.18917e-18	0.482257
Ptges2	7.51313	8.89355	11.1861	9.98912	22.8938	10.8829	-1.07255	4.98634	5.72549e-38	1.37772e-36	0.475476
Ptges	8.25215	7.18696	46.3699	31.5986	61.7979	24.6362	-1.32669	7.2317	2.94737e-277	5.21661e-275	0.398683
Ptgir	2.13821	2.04207	9.32404	6.74585	11.8937	6.67576	-0.832923	4.90757	9.3426e-23	1.43427e-21	0.561391
Ptgr2	11.1654	10.9986	7.84124	7.73276	5.57565	9.12176	0.70987	4.60725	3.18353e-13	3.02343e-12	1.63566
Ptgs2	1.95788	2.46804	69.0688	51.4474	7.70315	4.3803	-0.814086	4.60271	5.80953e-18	7.05711e-17	0.568769
Ptk7	35.536	27.4682	21.8726	24.8493	20.655	33.1028	0.680406	6.87311	2.74866e-54	9.00081e-53	1.60259
Ptp4a1	3.20007	6.15354	11.4123	12.7866	7.345	4.52002	-0.700145	4.57672	1.76055e-13	1.69914e-12	0.61551
Ptp4a3	55.8434	51.6055	44.7009	39.2221	23.1547	42.1671	0.864744	7.00309	3.00718e-93	1.6429e-91	1.82102
Ptpn1	42.9876	39.1989	134.4	108.919	117.448	73.9625	-0.667135	8.61957	7.33751e-183	8.27053e-181	0.629756
Ptprd	9.73368	12.4234	6.05703	7.66603	2.0125	4.19997	1.06095	4.75229	5.40896e-29	1.00293e-27	2.08631
Ptprg	17.6283	20.048	20.2203	20.1852	7.53989	13.2361	0.811771	6.61891	8.38697e-64	3.196e-62	1.75537
Ptprm	50.1633	50.0745	54.5973	52.1653	18.0417	33.0527	0.873366	7.19749	1.85203e-108	1.17e-106	1.83193
Ptprs	26.664	24.9299	22.1467	25.5817	9.49335	15.1212	0.671507	6.43454	1.64531e-39	4.08295e-38	1.59274
Ptx3	0.4864	0.339735	70.7878	59.8078	22.4176	3.59739	-2.63791	4.52648	1.64935e-127	1.26151e-125	0.160661
Pus7	2.68444	3.58839	3.09483	3.57387	7.78188	3.85785	-1.01177	4.21371	1.40485e-20	1.95113e-19	0.495939
Pwp1	6.20727	6.09393	8.03616	7.50445	13.4455	6.89715	-0.962667	4.66209	4.22194e-25	7.03636e-24	0.513108
Pwp2	5.56567	4.96369	6.11872	6.78241	10.229	6.21386	-0.718876	4.95345	6.59027e-18	7.99645e-17	0.607571
Pwwp2b	25.0098	24.8662	21.6569	21.1135	18.2929	28.4661	0.637852	5.98111	1.21275e-26	2.11673e-25	1.55601
Pxmp4	17.794	17.6334	11.2612	12.3292	7.75819	14.0943	0.860767	4.04774	6.41344e-13	5.9459e-12	1.816
Pydc3	9.05707	6.54149	3.13939	3.07058	5.91991	10.4746	0.822899	4.65626	1.80305e-17	2.13102e-16	1.76896
Pyhin1	3.66084	3.57586	1.9232	3.00915	4.22212	8.52536	1.01331	4.52967	3.44536e-23	5.36624e-22	2.01854
Rab20	9.49406	13.4806	153.077	95.3146	98.3492	77.6032	-0.683404	6.44495	1.77267e-41	1.27394e-39	0.622694
Rab36	5.15822	4.72175	14.7604	9.08153	3.14585	2.69176	-0.700476	4.92229	8.44937e-16	2.29343e-14	0.615369
Rab3d	24.9128	24.7174	20.2236	24.0855	16.084	28.5962	0.830099	6.47566	2.06051e-60	7.37926e-59	1.77781
Rab44	2.41093	2.68767	11.9898	10.8159	8.05698	3.31181	-1.28201	4.47773	2.03679e-37	4.83056e-36	0.411222
Rab6b	16.0487	15.6882	11.6605	12.4981	4.82303	7.72837	0.679994	4.92827	5.86773e-15	6.09129e-14	1.60213
Rad23a	26.285	27.7627	25.1287	23.6412	23.8645	36.3678	0.607701	5.99676	1.25034e-24	2.04719e-23	1.52383
Rarres2	102.199	98.9585	89.4653	86.0894	72.1708	121.177	0.747522	6.13573	1.47223e-39	3.67046e-38	1.67891
Rasa2	4.04974	4.48851	4.90279	5.03028	7.3094	4.32582	-0.756548	5.01053	2.36232e-20	3.24698e-19	0.591911
Rasal3	8.31154	6.67083	5.98868	5.38164	4.90239	8.44634	0.784515	4.65772	3.9051e-16	4.30425e-15	1.72251
Rasd1	4.09499	5.16447	35.6166	24.5957	16.3086	7.31301	-1.15644	4.18565	8.32952e-26	1.41688e-24	0.448618
Rasd2	2.12729	1.47728	2.65676	2.07904	5.80413	1.8375	-1.65748	3.34089	1.46749e-27	2.62774e-26	0.316992
Rasgrf2	8.87209	8.68511	3.17998	4.30918	2.44406	4.50278	0.881174	4.69658	2.64744e-20	3.62054e-19	1.84187
Rasgrp2	45.5043	37.7798	36.5047	33.6249	15.1859	25.9274	0.771569	5.53444	1.25325e-27	2.24787e-26	1.70712
Rasgrp3	21.926	27.5438	12.454	13.1616	9.33879	16.0355	0.77983	5.93069	1.39595e-36	3.23896e-35	1.71693
Rasip1	120.218	116.418	230.141	176.616	179.128	105.072	-0.769598	8.76589	6.03729e-269	1.0427e-266	0.586581
Rasl10b	0.725208	0.33036	6.50305	6.35008	26.053	6.92328	-1.91149	5.74955	3.11492e-178	3.36914e-176	0.265817
Rassf10	1.38022	1.17613	1.65866	1.27042	2.66778	0.620111	-2.10009	2.42214	3.40248e-22	5.09208e-21	0.233244
Rassf7	24.9646	20.8978	13.3072	16.5833	27.7658	16.8909	-0.716851	5.05108	6.16122e-19	7.89167e-18	0.608424
Rbl1	2.43652	2.94062	1.14997	2.35268	2.55501	4.93548	0.949318	4.24122	3.43238e-17	3.99065e-16	1.93096
Rbm14	22.1879	20.9475	11.6595	13.5384	29.9636	19.8644	-0.592941	6.09699	1.45932e-26	2.54088e-25	0.66299
Rbpjl	19.2283	14.8129	13.4358	11.6332	5.87193	11.7825	1.00425	4.48925	4.05295e-22	6.03602e-21	2.0059
Rcan1	26.7594	24.9654	137.997	87.8145	30.9236	21.6507	-0.652075	7.9959	1.15624e-107	2.1721e-105	0.636365
Rcan2	11.6954	11.6023	10.8208	11.8965	12.2165	7.74162	-0.657928	5.0332	5.26672e-16	5.77532e-15	0.633788
Rcl1	6.30994	5.36642	10.9476	8.61991	12.1557	6.79913	-0.83771	4.04997	2.53601e-13	2.42352e-12	0.559531
Rcn3	80.5246	61.1254	58.1524	63.9016	26.8184	58.0945	1.11498	6.00309	9.21643e-73	3.96343e-71	2.16593
Rdh10	6.59326	8.03914	16.9312	15.4981	17.0789	7.1283	-1.26008	4.73026	4.04641e-43	1.07117e-41	0.41752
Rdh12	1.09873	1.22367	30.9121	26.8399	9.09348	2.94683	-1.62375	3.25093	5.42063e-25	8.99908e-24	0.324491
Relb	20.7433	14.6598	118.835	76.4444	74.2522	44.8611	-0.636438	7.70814	2.21983e-84	3.21216e-82	0.643299
Rell1	14.7194	15.919	23.1855	24.2485	30.3925	17.805	-0.771334	6.2456	1.40866e-48	4.14963e-47	0.585875
Retnla	55.9184	56.4575	215.243	344.339	301.107	724.637	0.67782	7.42646	2.72632e-73	3.35557e-71	1.59972
Retnlg	3.70129	4.4381	565.512	731.872	274.416	25.3156	-3.43744	6.37412	0	0	0.0923055
Rfc2	22.8048	20.566	15.1969	16.787	13.4202	21.0967	0.652353	4.74544	2.04179e-12	1.82653e-11	1.57173
Rgs16	0.388631	0.197778	21.1577	14.8193	30.5573	4.95405	-2.62382	5.25672	6.34278e-209	8.28274e-207	0.162237
Rgs4	4.27838	4.08939	15.7077	14.3255	10.7594	3.18128	-1.75687	4.27014	1.59815e-56	5.38145e-55	0.29589
Rhbdf1	45.1442	38.0116	81.3787	57.6497	57.7037	34.1453	-0.75692	7.03601	9.55645e-80	4.42989e-78	0.591758
Rhob	343.121	297.923	1020.23	661.143	434.298	303.819	-0.625853	10.8324	0	0	0.648036
Rhoc	87.6213	80.1229	239.454	194.538	247.072	163.881	-0.592255	7.72957	1.04904e-78	4.83143e-77	0.663306
Rhoj	54.8961	58.0298	89.451	73.5734	79.1283	50.1204	-0.658752	7.21618	1.47962e-68	5.96752e-67	0.633426
Rhou	5.85342	6.71728	58.2489	37.3221	21.7692	12.2482	-0.642156	7.29086	9.26154e-65	1.00683e-62	0.640755
Riok3	23.9415	25.4973	54.4303	51.8033	56.2791	34.8241	-0.692474	7.34452	1.71797e-82	8.24933e-81	0.618792
Ripk2	4.47086	5.53222	29.9785	19.9541	12.5825	9.76908	-0.587106	5.53279	5.59743e-17	1.64437e-15	0.665677
Rlf	5.10306	5.49862	9.50666	8.98494	9.13243	6.04576	-0.594957	5.61102	3.08985e-19	4.02018e-18	0.662064
Rlim	8.38646	10.2872	16.607	15.6684	14.2909	9.36402	-0.609833	6.42557	8.92727e-35	1.96492e-33	0.655273
Rnaseh2c	30.7206	24.4765	22.0581	21.5932	17.4529	31.03	0.829652	4.01167	6.15162e-12	5.34454e-11	1.77726
Rnaset2a	52.7654	37.5195	57.1246	43.6951	45.205	74.2395	0.715578	5.88157	2.68849e-30	5.17312e-29	1.64214
Rnaset2b	45.8071	31.8564	50.7784	41.6381	38.9754	63.1336	0.695707	5.72887	4.34333e-26	7.45925e-25	1.61968
Rnd1	10.4515	8.36618	219.119	166.874	94.3312	22.1288	-2.09159	6.90327	0	0	0.234622
Rnf103	12.5036	13.4066	15.646	12.8191	14.7256	9.03513	-0.70453	5.23928	1.20422e-20	1.679e-19	0.613642
Rnf125	7.09022	6.13539	25.3835	18.8492	16.558	4.97582	-1.73305	3.75774	3.85131e-39	9.45868e-38	0.300816
Rnf144a	55.9608	54.0893	29.3557	31.6919	20.3399	34.8554	0.777016	7.19473	9.92956e-87	4.99182e-85	1.71358
Rnf144b	8.95456	8.40144	20.4057	18.5188	16.5428	9.05243	-0.869672	5.82554	5.35483e-45	1.48164e-43	0.547271
Rnf149	13.1353	15.8302	70.7822	65.4089	100.5	62.3751	-0.688118	7.59226	2.13815e-96	1.20502e-94	0.620663
Rnf169	8.30363	9.67855	11.0492	10.4596	12.1936	7.60437	-0.681127	6.10984	6.72179e-35	1.48713e-33	0.623678
Rnf5	30.1228	32.0361	17.8718	22.7067	21.2574	33.5647	0.658759	4.94988	2.36678e-14	2.38752e-13	1.57872
Rnpep	34.1138	34.1789	24.2042	30.306	36.2555	59.051	0.703696	6.81347	1.42462e-55	4.7449e-54	1.62867
Robo4	40.6614	41.3416	56.0902	53.9087	73.6728	42.2534	-0.802028	7.69747	2.62912e-140	2.21674e-138	0.573543
Ror1	2.06681	1.88438	2.96089	2.93005	4.65309	2.1862	-1.0888	3.54078	2.87608e-15	3.03569e-14	0.470152
Rpl30	40.9485	26.0693	46.6624	27.029	36.2255	31.5763	-0.787341	4.35716	8.5539e-14	2.01751e-12	0.579411
Rpl37	55.6704	38.4998	63.953	44.9763	69.3622	43.0488	-0.688035	5.56976	1.38641e-24	2.26306e-23	0.620699
Rpl41	254.358	178.946	277.742	181.211	205.169	312.984	-0.616009	6.64943	7.21118e-39	4.87175e-37	0.652473
Rplp2	122.312	94.0256	139.576	89.2983	141.814	115.454	-0.644206	5.61796	3.44049e-21	1.24884e-19	0.639845
Rps6ka2	10.9105	9.30389	10.462	9.90007	25.0312	11.4808	-1.12438	6.56587	1.67314e-126	1.26169e-124	0.458698
Rrp12	2.94439	2.8548	4.65475	4.52477	8.17253	4.94943	-0.72326	4.78604	3.28197e-16	3.63803e-15	0.605727
Rrs1	13.4506	12.5556	26.9835	22.6454	28.1904	17.9543	-0.650737	5.52727	1.45438e-21	2.11453e-20	0.636955
Rsad2	4.17155	6.11181	7.30057	17.5696	31.0652	65.3084	1.26668	5.62748	6.18915e-66	6.86771e-64	2.40607
Rsc1a1	23.0821	26.6961	29.8645	31.8589	34.8782	22.6322	-0.623848	5.91917	4.8316e-26	8.27127e-25	0.648938
Rsu1	46.217	45.8829	37.3031	49.4892	31.0009	46.5986	0.58787	5.80658	3.50324e-20	4.76352e-19	1.50303
Rtkn2	49.6702	59.2395	14.6192	22.8405	21.3185	39.5366	0.64364	6.24061	3.9413e-30	2.08928e-28	1.56227
Rtn4rl2	4.58104	6.2684	30.1798	23.2711	49.2	20.7231	-1.24711	5.39964	4.33026e-66	1.68613e-64	0.421292
Rtp3	5.94029	6.75991	1.98583	3.00868	1.56273	5.34999	1.77288	3.16733	7.26993e-24	1.15413e-22	3.41736
Rtp4	17.2509	18.8747	23.1343	30.6801	47.9062	98.1261	1.03433	6.89617	1.5646e-121	1.1282e-119	2.04816
Runx1	9.35412	9.77581	19.1607	15.3721	21.7859	13.5833	-0.681505	6.93971	8.26249e-61	2.99407e-59	0.623515
S100a8	11.6836	17.5631	564.821	650.243	438.323	272.458	-0.685912	7.08538	6.13387e-68	2.43716e-66	0.621613
S100a9	37.4658	42.7426	1581.9	1661.7	1410.71	544.118	-1.3744	8.82708	0	0	0.385714
S1pr2	20.5245	19.633	13.0368	20.5723	25.4078	35.142	0.657964	5.60277	1.90576e-20	6.65805e-19	1.57785
Saa2	0.0498992	0.00497016	23.8654	19.2286	41.9321	19.7943	-1.08236	4.17754	1.05907e-22	1.61776e-21	0.472257
Samd9l	9.16528	11.4184	9.27065	14.9603	13.5825	21.97	0.690275	6.05334	2.6391e-30	1.41298e-28	1.61359
Samhd1	56.0171	60.342	94.0025	110.606	174.759	280.917	0.684766	9.87127	0	0	1.60744
Samsn1	2.00701	3.01666	27.7463	32.8005	26.5784	17.7072	-0.585775	5.32076	1.63578e-15	1.74984e-14	0.666291
Sardh	6.84934	6.12797	4.2358	4.75435	2.66188	6.67225	1.32504	4.47608	3.35986e-35	7.52665e-34	2.50539
Sash1	31.9628	35.4351	67.6925	60.0946	41.3094	23.3808	-0.821109	7.81625	1.79679e-159	1.69515e-157	0.566007
Sbno2	30.5674	28.1965	285.811	177.209	201.305	105.019	-0.689603	10.0272	0	0	0.620025
Scarb1	62.2724	51.366	83.1537	62.5187	121.151	53.9344	-1.16747	7.72488	6.07106e-302	1.20387e-299	0.4452
Scd1	303.106	259.742	298.638	246.582	120.383	265.731	1.14233	9.92441	0	0	2.20737
Scgb3a2	256.624	337.982	332.981	265.702	145.626	60.5789	-1.26522	6.37412	4.22756e-140	3.53662e-138	0.416036
Scn7a	46.1579	54.8167	25.6184	34.3652	8.8797	20.05	1.1749	6.78771	2.76768e-143	2.3997e-141	2.25777
Scp2	28.4984	34.5302	24.1241	29.6725	19.696	31.6859	0.685839	6.13258	1.21137e-33	2.57367e-32	1.60864
Scpep1	21.792	24.1036	18.5272	24.1066	16.7194	29.3922	0.813741	5.62153	3.59562e-32	7.30586e-31	1.75776
Scube2	18.5977	16.7769	16.6571	17.2606	4.49846	2.35502	-0.932897	3.55964	9.63219e-12	8.25792e-11	0.523805
Sdc3	69.6695	62.1386	56.5013	59.448	45.9621	70.7895	0.623068	8.21383	8.60776e-114	5.76074e-112	1.54015
Sdc4	97.4845	115.427	721.654	578.572	490.431	169.765	-1.53049	9.58776	0	0	0.34616
Sdf2l1	21.3246	14.7192	13.2502	19.7758	27.3198	62.5442	1.19467	5.69729	9.65675e-67	3.77389e-65	2.28892
Sdpr	243.531	265.57	140.769	165.148	74.2226	128.994	0.797349	8.31938	2.0994e-196	2.614e-194	1.73791
Sectm1b	0.0485179	0.198885	3.24167	2.49519	7.46748	3.39438	-1.1365	3.59664	4.40852e-17	5.10892e-16	0.454861
Sele	0.33986	0.191412	38.208	33.9896	6.09203	1.99465	-1.60917	3.47608	1.17731e-28	2.16609e-27	0.327787
Sell	14.5017	14.1096	31.9141	35.305	12.6228	20.6663	0.711056	5.30874	1.52966e-20	2.11759e-19	1.637
Selm	32.5018	23.7887	16.6241	14.6133	7.54917	22.6708	1.58503	3.79536	4.68327e-30	8.94709e-29	3.00013
Selp	1.44376	2.19159	81.909	55.2898	33.768	7.90777	-2.09392	6.06269	3.00828e-257	4.88071e-255	0.234244
Sema3a	7.71033	7.8198	3.66482	6.18576	4.30208	8.80503	0.754961	5.12056	4.06026e-19	1.32553e-17	1.68759
Sema3c	69.6209	86.5601	60.591	73.8612	18.5799	37.7063	1.02098	7.1755	1.5257e-143	1.32823e-141	2.0293
Sema3g	105.962	97.9189	72.3489	68.838	60.2127	101.8	0.757565	8.2614	4.20165e-171	4.24446e-169	1.69064
Sema4a	17.2321	15.3576	48.7044	41.2227	81.7787	53.1351	-0.62203	7.7313	8.53304e-87	4.30999e-85	0.649756
Sema4c	17.6405	17.0619	115.308	76.7297	45.2022	19.0602	-0.587618	8.47732	1.41906e-121	3.13305e-119	0.665441
Sema6b	8.79202	9.92393	34.4686	27.3091	29.925	13.5464	-1.14329	6.32582	5.58715e-111	3.648e-109	0.452725
Sema6c	3.70285	2.35441	1.08572	2.03793	3.76448	1.45963	-1.36478	2.82164	3.65367e-14	3.6564e-13	0.388293
Sept4	119.194	104.578	59.6394	67.3725	30.2186	63.2556	1.06561	6.31059	3.02756e-86	1.51846e-84	2.09305
Sepw1	201.764	217.193	170.502	188.24	144.708	266.19	0.879249	7.22359	8.07084e-112	5.302e-110	1.83942
Serinc2	18.8556	17.4203	17.5757	15.9589	29.9328	18.1521	-0.721426	5.46027	7.45278e-25	1.23155e-23	0.606498
Serpina3b	0.0279446	0.158455	3.15961	0.281214	4.20283	1.49276	-3.46652	1.67565	1.11049e-25	4.93408e-24	0.0904635
Serpina3c	6.24534	4.96739	13.3947	21.0177	17.6067	10.6343	0.649699	4.90022	7.02396e-13	1.53652e-11	1.56884
Serpina3f	2.43317	4.15696	88.5164	57.6782	184.951	139.676	-0.617878	7.32658	1.66545e-61	1.73987e-59	0.651629
Serpina3h	1.44464	8.52951	251.115	7.17764	228.866	78.7391	-5.12769	7.87249	0	0	0.0286029
Serpina3i	0.288822	1.79703	36.2516	3.50016	31.1271	13.1955	-3.37077	5.29285	2.55382e-284	1.3022e-281	0.0966712
Serpina3m	1.68687	0.900583	6.99072	13.5277	9.52059	16.5264	0.95177	4.14395	3.40133e-15	8.905e-14	1.93424
Serpinb9	27.5367	30.0674	24.8009	35.302	39.0937	63.8974	0.708779	7.48761	7.65572e-89	3.92237e-87	1.63442
Serpine1	13.7044	14.3157	228.061	193.236	158.775	41.2118	-1.94577	8.14474	0	0	0.259577
Serping1	241.738	243.939	227.278	248.391	252.129	400.596	0.667972	9.24923	1.5338e-264	2.60698e-262	1.58884
Serpinh1	319.838	280.829	178.391	217.619	141.587	309.352	1.12754	9.13658	0	0	2.18486
Sesn1	15.6078	16.9421	20.7396	19.5645	15.231	8.94941	-0.766942	5.22458	5.4229e-24	8.66046e-23	0.587662
Sfn	12.8982	13.1922	110.96	75.9621	31.288	16.5407	-0.919344	5.22063	2.24428e-33	4.74e-32	0.528749
Sfrp1	6.45745	7.62167	5.55862	8.41141	8.38941	16.7464	0.997019	5.83072	4.74385e-53	1.51633e-51	1.99587
Sfrp2	11.7531	10.1565	2.96035	6.70585	1.20245	5.80399	1.17822	3.3399	5.03047e-13	1.11872e-11	2.26298
Sftpa1	573.942	616.73	718.7	653.806	511.894	801.945	0.647655	10.866	0	0	1.56662
Sftpc	10040.7	9088.19	8990.78	7390.32	5158.64	3281.38	-0.652683	11.6915	0	0	0.636096
Sfxn5	3.42854	3.61055	6.95468	7.81911	4.46349	7.44032	0.736848	4.48103	4.49262e-13	4.21621e-12	1.66653
Sgk1	39.0853	41.3417	80.1067	88.5727	99.7098	58.6141	-0.766455	7.90034	2.71444e-147	2.41213e-145	0.58786
Sgms2	1.21229	1.60176	6.06133	5.62631	6.29527	3.56552	-0.819862	4.79137	2.3123e-20	3.18048e-19	0.566496
Sgsm2	9.19571	9.36981	5.49422	5.85025	4.2077	8.86706	1.07506	5.01396	4.07422e-35	9.08891e-34	2.1068
Sh2d4a	7.9745	6.90269	5.12753	5.77377	10.6503	5.4794	-0.958349	4.42899	2.22609e-21	3.20821e-20	0.514645
Sh3bgrl	64.9326	100.636	49.9747	84.3313	47.5937	44.4996	0.754827	7.61757	2.32112e-102	4.04138e-100	1.68743
Sh3d19	15.7701	18.0879	7.78055	9.80533	8.23537	13.0332	0.66219	6.12627	2.13871e-31	4.26071e-30	1.58248
Sh3glb2	38.7842	36.4825	23.384	23.7525	15.6242	29.1689	0.900403	5.318	1.30474e-31	2.61388e-30	1.86659
Sh3kbp1	7.80462	7.21893	6.6597	7.87867	3.99401	7.47658	0.904218	4.89648	3.60657e-24	5.79867e-23	1.87153
Sh3pxd2b	8.68854	9.73837	30.6296	26.252	23.7198	13.0937	-0.857158	7.05025	6.43034e-103	3.85748e-101	0.552039
Sh3rf2	9.22978	7.69252	3.13328	4.29774	1.97401	4.87389	1.30306	4.09806	1.09894e-26	1.92122e-25	2.46751
Shroom2	4.46213	5.36478	6.68291	7.54092	6.53589	4.31027	-0.600456	5.31245	3.12922e-16	3.47771e-15	0.659545
Siae	6.10812	6.32086	2.76747	3.40261	1.8342	4.08088	1.15251	3.40138	6.38781e-14	6.3013e-13	2.223
Siah2	9.17718	8.34519	10.0405	5.56781	7.22221	6.85312	-0.850158	4.22763	2.01024e-14	4.99435e-13	0.554724
Sigirr	16.4318	15.0444	11.0345	11.0109	9.14459	15.1899	0.731813	4.63567	3.64104e-14	3.64547e-13	1.66072
Siglec1	1.49804	1.19465	1.02402	1.68534	1.40691	3.14568	1.15998	3.91978	1.42828e-19	1.88699e-18	2.23454
Slamf7	1.69602	1.52926	2.04775	2.91291	3.00759	8.45797	1.49095	4.58288	6.40136e-46	1.80147e-44	2.81074
Slamf8	0.713523	0.835462	1.05961	3.45516	6.84497	18.1151	1.40345	4.73856	5.13315e-46	1.4522e-44	2.64533
Slc10a6	17.0984	19.3063	59.2356	40.1472	32.9734	10.956	-1.58917	5.46362	1.05995e-106	6.57969e-105	0.332362
Slc10a7	5.51238	5.55127	5.69244	5.83684	4.91858	8.00991	0.703242	4.58901	7.85247e-13	7.22994e-12	1.62816
Slc12a2	17.5122	21.7902	27.1764	26.6083	28.3452	18.1193	-0.645535	7.20824	1.56573e-65	6.04176e-64	0.639256
Slc13a3	0.876527	0.504925	1.87562	1.93181	12.8497	2.21606	-2.53404	4.48761	5.28531e-117	3.66311e-115	0.172654
Slc16a10	3.4861	5.13568	3.89945	3.42702	2.72665	4.87792	0.838717	4.40138	2.44669e-15	2.59398e-14	1.78846
Slc16a11	37.9747	41.1617	48.9259	32.1546	22.5167	16.112	-0.605483	6.11662	1.77244e-26	8.05914e-25	0.657252
Slc16a1	6.84927	7.13133	11.5801	11.427	22.8302	13.2317	-0.786843	6.27633	1.51422e-51	4.71344e-50	0.579611
Slc16a3	6.71823	6.51118	54.0797	45.3351	27.4043	17.7065	-0.630011	5.77936	6.89892e-24	1.09686e-22	0.646171
Slc16a9	33.8535	36.5962	31.8155	35.6754	44.338	23.898	-0.89158	6.87813	6.01282e-99	3.47091e-97	0.539023
Slc19a2	2.01867	2.2926	2.80181	2.2061	5.10107	2.65225	-0.94287	3.73026	2.07525e-13	1.9912e-12	0.520197
Slc1a1	6.45337	7.35227	7.48544	7.7573	8.88874	5.35628	-0.730466	4.68374	1.85409e-15	1.97548e-14	0.602709
Slc1a2	0.68241	0.629692	0.373361	0.379777	1.04361	0.390487	-1.4163	2.97936	9.58055e-17	1.0972e-15	0.374673
Slc1a4	11.2399	11.5891	8.26367	7.42489	4.81007	7.59378	0.658489	4.64011	8.07005e-12	6.95766e-11	1.57843
Slc1a5	75.7522	80.6924	135.065	102.814	114.267	74.1745	-0.623391	7.98808	8.54311e-104	5.21252e-102	0.649143
Slc24a3	10.5327	10.5364	10.0935	9.80172	7.77571	4.44406	-0.8067	4.3427	7.15411e-15	7.40156e-14	0.571688
Slc24a4	10.22	7.11049	6.78197	9.4821	2.73644	5.992	1.12941	3.24705	2.43861e-12	2.16523e-11	2.18769
Slc25a12	9.8802	9.9839	12.7828	12.2138	8.21948	14.4505	0.813749	5.09268	9.89839e-23	1.51851e-21	1.75777
Slc25a22	10.8144	10.7795	8.5619	9.97092	16.8909	25.5998	0.599786	5.91978	7.09183e-23	1.09265e-21	1.51549
Slc25a23	17.6987	16.4899	14.8781	13.0627	9.61632	14.6921	0.611332	5.38473	1.50956e-16	1.70781e-15	1.52767
Slc25a25	14.0313	12.0254	108.418	53.4478	24.118	13.6123	-1.02037	8.10985	1.69612e-284	8.85953e-282	0.492991
Slc26a4	0.516582	0.503216	18.905	14.0256	21.3433	7.62276	-1.48501	5.40486	4.52696e-91	2.42374e-89	0.357245
Slc27a4	13.7315	13.7653	19.0198	20.3365	29.7651	16.8993	-0.816567	6.50353	1.4332e-64	5.50061e-63	0.567791
Slc28a2	1.02572	0.984968	1.94386	2.17629	1.70084	4.24944	1.31976	3.60271	7.72001e-20	1.02946e-18	2.49624
Slc30a4	4.39984	6.73787	7.42252	7.26198	8.55788	5.47799	-0.643439	5.22949	1.72024e-17	2.03877e-16	0.640185
Slc35e4	18.5738	17.0984	23.6905	19.1207	28.5061	17.1866	-0.729879	6.08781	2.74329e-39	6.76068e-38	0.602955
Slc36a2	17.5433	16.0189	10.6311	14.3532	9.9099	15.5805	0.652586	4.9875	2.1297e-14	2.15445e-13	1.57198
Slc39a14	6.2418	7.7292	41.8213	34.5061	68.7481	23.4353	-1.55256	7.74853	0	0	0.340905
Slc41a2	2.27521	2.22346	6.75016	7.6914	6.10582	3.16266	-0.948559	4.29473	2.15162e-19	2.82174e-18	0.51815
Slc45a3	6.08126	6.25076	13.5358	8.35193	4.90024	4.45661	-0.69639	5.14946	3.94844e-18	1.22728e-16	0.617114
Slc4a1	2.15104	3.65158	1.77631	5.91875	1.97493	5.31694	1.73509	4.22137	5.45918e-43	4.08789e-41	3.32901
Slc4a3	6.99276	7.82178	4.18074	5.05346	3.22158	5.46819	0.762893	4.30966	2.07811e-12	1.85668e-11	1.69689
Slc4a5	12.0459	14.4792	9.54526	8.42009	1.7202	4.28972	1.31735	4.00939	8.74092e-26	1.48332e-24	2.49209
Slc6a14	11.4203	14.3322	61.3147	61.6857	59.3842	18.6481	-1.6709	6.9814	0	0	0.314058
Slc7a10	25.2017	25.558	10.1223	15.5922	2.2902	9.80713	2.09595	3.65334	8.40111e-42	2.1703e-40	4.27509
Slc7a5	3.49594	3.18412	11.3945	10.5918	18.3562	11.3457	-0.693993	5.6679	1.64257e-26	2.85761e-25	0.618141
Slc7a6	6.17283	6.11993	19.3956	16.6255	18.6535	8.38808	-1.15279	5.59588	2.6587e-65	1.02408e-63	0.449755
Slc7a8	1.1829	1.43183	1.86593	2.48895	4.96496	10.1887	1.03676	4.98634	1.82694e-32	3.75847e-31	2.05162
Slc8a1	2.37112	2.51824	1.36633	1.8994	1.04303	2.05133	0.975425	4.89648	2.11445e-27	3.77045e-26	1.96622
Slc9a3r2	277.317	275.665	229.893	197.995	141.205	249.647	0.822084	8.73571	3.08066e-277	5.40782e-275	1.76796
Slc9a8	10.5137	10.1732	15.4942	14.3065	18.1677	11.5142	-0.657868	6.02926	5.80814e-31	1.14117e-29	0.633814
Slfn5	33.9054	42.0975	51.1083	51.4158	41.0042	64.9309	0.663112	8.34407	3.40027e-140	2.85569e-138	1.58349
Slfn8	1.64065	1.502	2.01502	2.65963	5.12181	9.59241	0.904921	4.92948	1.45921e-24	2.37827e-23	1.87244
Slit2	7.16428	7.71324	4.61738	6.05966	1.92	4.22252	1.1365	4.67368	5.66721e-31	1.1145e-29	2.19847
Smad1	15.887	15.7645	30.2199	28.6064	29.5579	15.6012	-0.921745	6.05441	1.83712e-60	6.59025e-59	0.52787
Smarcb1	31.8082	30.3772	20.3239	23.3584	21.8938	33.3411	0.606649	5.54788	4.12085e-18	5.04297e-17	1.52272
Smoc2	7.54953	6.87251	8.23288	7.53267	31.781	17.7833	-0.837518	6.08835	2.59454e-51	8.05284e-50	0.559606
Smox	17.1336	16.4214	40.5988	32.4925	68.4987	36.7468	-0.898379	6.84745	2.28436e-98	1.31158e-96	0.536489
Snap47	23.604	20.3662	11.7521	13.0575	9.99966	17.057	0.770093	4.67512	8.03251e-16	8.7145e-15	1.70538
Snhg8	10.3381	6.8466	16.3453	12.4215	17.278	7.16447	-1.26855	3.19573	6.63924e-16	7.25069e-15	0.415078
Sntb2	6.07317	6.63051	19.522	15.7662	13.3248	6.87591	-0.954267	5.4307	3.35086e-41	8.54309e-40	0.516104
Snx25	29.9277	34.2749	22.6634	26.1669	17.6303	27.9731	0.665887	6.16271	1.7157e-32	3.53303e-31	1.58654
Soat1	14.3942	16.5198	10.3117	10.8723	11.0612	17.2268	0.63905	6.1141	3.63682e-29	6.76095e-28	1.5573
Socs3	19.4293	24.8222	588.138	398.633	321.642	125.877	-1.35342	9.18179	0	0	0.391364
Sod2	15.0157	16.8271	92.93	69.8242	125.729	77.92	-0.690238	8.56801	6.6216e-189	7.74908e-187	0.619752
Sort1	66.0403	68.4835	51.5942	52.8507	21.0488	32.1604	0.611514	7.52167	1.24636e-68	5.03624e-67	1.52786
Sox12	3.81352	5.03502	1.878	3.56962	2.46478	5.44442	1.14262	4.18969	1.01801e-22	1.55726e-21	2.20781
Sox17	40.8308	43.5338	16.1188	20.5679	27.1831	44.5886	0.713899	6.84872	1.79863e-58	6.22285e-57	1.64023
Sox9	0.364303	0.706164	1.57752	1.57204	4.61003	0.278556	-4.03737	3.19573	3.91711e-86	1.95545e-84	0.0609019
Sp100	19.9024	18.32	16.9487	23.3248	26.3027	41.0798	0.643126	6.21767	1.37289e-31	2.74527e-30	1.56171
Sp110	8.8356	9.92918	10.3069	11.7733	17.2342	31.5337	0.871425	5.60801	5.40544e-36	1.23811e-34	1.82947
Spata13	7.5512	7.18188	15.4085	15.6131	24.5629	14.8518	-0.725788	7.17193	1.68374e-80	7.87316e-79	0.604667
Speg	2.24628	1.85569	1.14375	1.23947	0.880772	1.87538	1.08956	3.94869	7.15784e-18	8.65569e-17	2.12809
Sphk1	20.7316	24.7607	146.443	96.9515	176.032	44.2379	-0.594974	7.80161	1.05278e-78	1.39175e-76	0.662056
Spon2	32.7252	42.5057	5.54285	6.99071	1.94522	14.11	2.85593	4.27965	2.72809e-96	1.53346e-94	7.23972
Spry4	14.8803	13.7857	53.6389	47.4058	26.6391	17.3262	-0.620527	6.6234	5.31236e-41	1.34958e-39	0.650433
Spsb1	10.1955	14.2534	37.0373	30.0232	37.1333	15.8117	-1.23155	6.273	5.77562e-124	4.25054e-122	0.425859
Srcin1	4.86793	5.08335	2.70999	2.91039	1.10122	2.62003	1.24942	3.75774	5.73989e-20	7.7263e-19	2.37746
Srgn	72.9904	93.4834	352.29	339.344	437.175	247.42	-0.821224	8.28296	1.06813e-219	1.48539e-217	0.565962
Ssh1	15.9666	17.0691	23.1236	18.2759	19.3614	12.9059	-0.585042	5.64674	3.71276e-19	4.80728e-18	0.66663
Sspn	8.20156	9.04255	6.01691	6.87574	3.45338	5.87497	0.766192	4.40138	2.7974e-13	2.66737e-12	1.70077
Sstr4	8.69019	7.54936	10.0441	8.69396	1.32129	4.68265	1.81991	2.14252	8.68269e-13	7.97036e-12	3.53059
St3gal5	14.0964	14.424	14.5378	14.2141	8.81269	13.9854	0.666028	4.83718	1.19302e-13	1.1624e-12	1.5867
Stat1	18.8003	18.5764	15.4308	43.906	77.2666	176.506	1.50848	7.34255	3.37100149721918e-310	2.06267e-307	2.8451
Stat5a	9.31963	8.32954	16.1646	12.3753	20.4119	11.863	-0.782812	5.92948	1.50537e-39	3.74873e-38	0.581233
Stc1	3.44221	4.08138	5.99842	6.42129	0.734545	2.17959	1.56576	2.52167	3.8969e-13	3.67648e-12	2.96033
Steap3	14.3527	13.4639	4.94981	6.91242	4.15315	9.1039	1.13169	4.4307	3.77065e-26	6.49655e-25	2.19115
Steap4	4.44365	5.43132	141.103	104.475	91.5466	36.2295	-1.33727	7.57922	0	0	0.39577
Stfa2l1	0.404522	0.792273	26.2259	19.9395	27.5097	8.46543	-1.69752	2.81118	2.70828e-20	3.70137e-19	0.308316
Stk19	12.6638	12.3625	26.1482	24.8922	32.4323	20.3046	-0.675384	4.7927	1.91494e-14	1.94269e-13	0.626166
Stmn1	37.8552	39.551	21.123	23.1752	13.0114	26.387	1.01953	4.43581	5.03911e-22	7.46834e-21	2.02726
Stmn2	26.2424	25.0911	19.0154	19.3398	2.64603	9.24551	1.80294	3.58441	5.37316e-32	1.08661e-30	3.4893
Stx2	15.658	11.6209	11.3236	10.5268	9.8598	20.8251	1.07844	5.54236	2.63809e-50	8.0366e-49	2.11175
Stxbp1	23.7532	23.9755	25.8866	27.4125	15.2869	26.7711	0.808278	6.43794	5.00627e-56	1.67784e-54	1.75112
Sulf1	16.2965	14.1898	8.54824	10.5076	6.23566	9.68375	0.634852	5.23537	3.77759e-16	4.168e-15	1.55278
Sulf2	13.836	13.4419	17.0749	14.3018	9.56576	15.8841	0.731482	5.68875	8.8958e-28	1.60364e-26	1.66034
Svep1	11.065	9.74723	7.82771	8.5859	5.60262	8.73704	0.640963	6.37056	1.00669e-34	2.20669e-33	1.55937
Synpo	38.6172	41.9548	81.2021	51.8487	35.0015	31.725	-0.647188	8.34183	2.66534e-134	6.27264e-132	0.638524
Syt12	0.979438	0.811759	5.00705	4.09472	12.5895	3.44561	-1.86849	4.62377	9.25303e-80	4.29855e-78	0.27386
Syt15	5.28561	3.96638	1.41294	3.10258	3.29964	7.49984	1.1839	4.34995	9.24918e-27	1.61963e-25	2.2719
Tacc1	45.6355	45.6995	67.6767	63.5087	62.0049	38.9256	-0.671644	8.5651	1.53967e-178	1.67378e-176	0.627791
Taf4b	0.564798	1.22201	3.16271	2.94342	3.02307	1.31598	-1.19871	3.4187	1.03768e-16	1.18649e-15	0.435664
Tap1	32.2573	28.7331	47.9598	80.6961	206.25	302.671	0.75063	7.61219	6.53394e-101	1.12848e-98	1.68253
Tap2	53.1416	48.1286	65.142	88.7239	152.876	270.064	0.820923	9.08293	0	0	1.76654
Tapbp	151.037	143.349	167.909	220.842	320.827	617.834	0.945416	10.3823	0	0	1.92574
Tapbpl	20.7317	23.5435	29.6629	34.1746	56.9415	90.5722	0.669545	7.29145	8.444e-70	3.47096e-68	1.59057
Tat	0.543184	1.19953	3.2964	2.15324	2.31206	0.427711	-2.42328	1.59054	6.78089e-16	7.39407e-15	0.186431
Tatdn2	15.6	13.3952	25.6867	20.6279	37.4532	24.6229	-0.605014	6.3272	4.24617e-32	8.61953e-31	0.657465
Tbc1d15	6.37564	7.66434	11.2942	11.5191	14.0058	7.35271	-0.929434	5.28532	1.60141e-35	3.6177e-34	0.525064
Tbc1d30	7.71484	8.0463	4.47306	5.17786	3.99912	6.29481	0.654253	4.90757	7.96737e-14	7.82703e-13	1.5738
Tbc1d5	7.26603	7.08086	5.40643	6.25079	4.20025	6.87928	0.711548	4.99561	6.81759e-17	7.84133e-16	1.63756
Tbc1d8	13.4941	17.8243	18.5527	14.9518	16.3868	9.5727	-0.775399	5.80658	8.09948e-36	1.84139e-34	0.584227
Tbcc	11.1844	9.54401	30.4534	20.2941	18.2872	12.3765	-0.58541	5.51154	1.12289e-16	3.22356e-15	0.66646
Tbrg4	8.40895	7.60711	12.8897	11.7	17.39	10.9655	-0.665137	5.44006	3.64803e-21	5.21536e-20	0.630629
Tbx21	1.54765	1.55173	1.20952	0.965567	1.52575	3.91896	1.35875	2.86271	5.90706e-13	5.49547e-12	2.56463
Tbxa2r	14.5833	12.5828	4.82231	5.35785	1.70107	6.43615	1.9166	3.05219	1.27163e-24	2.08046e-23	3.77533
Tcf21	66.7464	59.9475	56.6074	48.6126	23.0006	35.3924	0.621594	5.19774	3.448e-15	3.6215e-14	1.53857
Tecr	63.9672	61.0625	54.2162	46.6562	35.1899	53.4159	0.601991	5.73234	3.5212e-20	4.7849e-19	1.51781
Tek	74.106	73.9831	47.8127	48.9003	33.6	55.4107	0.721668	7.73199	1.40063e-108	8.87452e-107	1.64909
Tep1	7.91384	6.53156	3.42289	4.67057	3.62412	6.21474	0.777865	5.36789	4.18451e-25	6.9794e-24	1.71459
Tes	13.0761	11.3283	20.6348	15.9485	23.4312	14.0387	-0.738864	5.47608	2.3466e-26	4.06592e-25	0.599211
Tet2	3.83327	3.91053	6.50958	5.54557	6.28842	3.44299	-0.868836	5.43496	1.35509e-34	2.95827e-33	0.547589
Tfdp2	8.98999	10.555	11.5767	11.8228	12.0341	7.83755	-0.618564	6.16373	4.51094e-30	8.62556e-29	0.651319
Tfrc	6.21928	7.73798	5.54795	8.44604	6.68397	10.4363	0.60613	5.13952	3.454e-13	7.74043e-12	1.52217
Tgfb3	21.902	25.148	10.7869	11.3915	5.73095	17.5459	1.6138	5.37678	2.40496e-89	1.24709e-87	3.06057
Tgfbi	17.1329	16.6543	43.4349	46.8884	88.3676	134.732	0.60848	8.25467	8.52281e-112	5.58179e-110	1.52465
Tgfbr3	20.8917	21.9776	35.5189	33.1815	30.9291	19.7989	-0.643505	7.22778	5.42086e-66	2.10695e-64	0.640156
Tgm1	1.60587	1.28796	25.864	15.517	21.8282	10.9219	-0.736962	5.83808	2.1879e-31	1.21704e-29	0.600002
Tgtp1	6.05027	6.80629	25.8428	48.5671	126.573	234.523	0.910117	6.76023	2.14635e-81	2.94655e-79	1.8792
Tgtp2	6.03308	6.78696	25.7694	48.4291	126.213	233.857	0.910117	6.76023	2.14635e-81	2.94655e-79	1.8792
Thbd	311.456	338.07	267.827	235.794	87.0867	146.304	0.748425	8.80007	6.20902e-242	9.36425e-240	1.67996
Thbs1	55.532	60.1288	500.53	349.7	178.492	95.0875	-0.908523	9.58412	0	0	0.53273
Thy1	13.3181	11.0416	10.5235	13.4358	7.12489	13.8373	0.957076	4.23341	2.79054e-17	3.27106e-16	1.94137
Tiam1	6.49682	6.6844	3.79049	3.97216	4.52119	7.5278	0.735356	5.49498	1.09011e-24	1.7862e-23	1.66481
Tie1	162.774	145.772	116.86	103.979	68.1319	103.956	0.609555	8.41471	4.08256e-125	3.02534e-123	1.52579
Tifa	3.6565	2.7297	42.0789	36.3351	57.4316	25.8091	-1.15382	6.41439	4.78547e-120	3.38236e-118	0.449432
Tifab	2.98599	3.07208	1.2703	2.27713	6.2328	12.4349	0.996121	5.07967	3.46218e-32	7.04811e-31	1.99463
Tiparp	7.68701	10.0648	27.8235	28.4041	13.5816	8.87399	-0.613868	5.51041	4.3128e-19	5.55399e-18	0.653442
Tle2	22.3914	18.3443	14.1319	11.7025	8.77261	14.3281	0.707562	5.14876	2.02032e-18	2.5097e-17	1.63304
Tlr12	1.55521	1.68729	1.57485	2.2207	1.01044	2.68645	1.408	2.62078	7.49403e-12	6.47406e-11	2.65368
Tmcc2	101.173	104.964	151.236	132.021	60.9586	107.134	0.813486	8.205	1.09965e-188	1.2799e-186	1.75745
Tmco1	9.88155	9.74659	6.4244	8.54322	4.52783	7.30214	0.689237	4.76182	8.38067e-14	8.22173e-13	1.61243
Tmco4	5.85021	5.63439	8.4666	8.51339	7.14861	12.5944	0.816792	5.07749	1.01377e-22	1.55189e-21	1.76148
Tmed3	42.3337	41.0494	28.0906	30.9464	28.0053	49.4174	0.819156	5.72191	9.18049e-35	2.01858e-33	1.76437
Tmed5	9.66001	16.4717	15.0451	21.0094	17.9542	11.4979	-0.642834	5.75297	2.71815e-24	4.40333e-23	0.640454
Tmeff1	8.71034	9.52002	7.45153	6.4829	3.39859	6.98221	1.03788	3.71632	2.61938e-14	2.63736e-13	2.05321
Tmem100	163.821	209.095	74.6809	123.434	84.8202	147.732	0.724883	7.49171	5.18426e-87	7.81875e-85	1.65277
Tmem106a	7.04059	7.32033	6.5412	10.2147	11.8871	19.5644	0.71863	5.2147	7.45896e-20	9.96513e-19	1.64562
Tmem119	39.0013	38.5827	17.9277	23.7583	9.44568	22.7504	1.26775	5.1268	2.27578e-50	6.94274e-49	2.40785
Tmem125	7.37583	7.57815	19.643	11.7419	14.4132	7.2023	-0.742076	4.82367	1.82261e-16	5.13592e-15	0.597878
Tmem132c	7.92297	7.62001	4.83747	6.1542	1.10843	3.38881	1.61059	3.59968	4.22898e-27	7.47877e-26	3.05378
Tmem150a	22.3267	19.9534	15.3182	13.9357	13.9082	22.9172	0.720235	4.8346	1.15219e-15	1.23997e-14	1.64745
Tmem176a	190.923	171.668	185.602	206.455	221.446	354.265	0.67785	8.29415	2.43388e-141	2.07665e-139	1.59975
Tmem200b	14.8459	12.7554	10.2661	8.84341	8.6055	16.246	0.916191	4.13625	3.28949e-15	3.4584e-14	1.88713
Tmem221	14.8896	10.125	4.36999	6.49264	4.68632	11.0191	1.23236	3.65626	2.26474e-18	2.80681e-17	2.34951
Tmem222	26.0958	21.1688	26.4275	24.456	32.8569	21.4848	-0.612727	5.29848	1.17821e-16	1.34002e-15	0.653959
Tmem229b	7.97816	7.86968	4.08574	5.64426	6.24791	12.1125	0.954763	5.19774	2.50304e-32	5.11498e-31	1.93826
Tmem37	22.6937	19.9835	58.3409	46.4566	84.3924	51.6498	-0.708246	6.07422	9.64357e-37	2.23998e-35	0.612064
Tmem44	18.0629	16.944	12.6815	12.8699	6.69233	11.1146	0.731682	5.2768	3.35551e-21	4.81324e-20	1.66057
Tmem86a	8.99954	7.44097	6.44106	7.57296	8.59528	14.8968	0.792998	4.43581	2.82617e-14	2.84423e-13	1.73267
Tmem87b	9.36353	11.3122	16.5865	15.5572	15.066	9.74985	-0.627732	5.8079	3.38457e-24	5.45403e-23	0.647193
Tmod1	24.3626	26.947	35.7462	32.0546	22.9393	14.7012	-0.641765	5.72122	8.21547e-24	1.30135e-22	0.640928
Tmod2	4.82043	6.05801	3.4383	5.21568	4.67252	5.50276	0.60101	5.46455	6.49217e-16	1.77342e-14	1.51678
Tmprss4	8.57274	7.86016	9.38699	9.87832	10.3744	18.3945	0.825985	5.06984	5.82943e-23	9.00752e-22	1.77274
Tmsb10	55.2484	58.1625	45.5094	46.2161	38.8973	98.591	1.34144	5.51847	2.86938e-72	1.22901e-70	2.53405
Tmtc2	11.9837	14.3003	6.58974	7.96392	6.06309	11.7872	0.958897	5.71071	1.06981e-45	2.99882e-44	1.94382
Tmx3	7.7335	12.786	6.31377	11.0314	7.96697	8.56404	0.804815	5.36855	4.33151e-25	1.87781e-23	1.74692
Tnf	0.391462	0.297236	51.1548	33.2269	67.6144	83.7502	-0.622422	6.0551	8.36893e-27	3.88783e-25	0.649579
Tnfaip3	8.04726	7.29938	344.721	235.467	157.516	78.0802	-1.01245	8.97109	0	0	0.495703
Tnfrsf12a	16.5892	17.8116	122.711	69.9629	65.9943	34.1889	-0.8105	6.48954	1.35346e-59	1.40027e-57	0.570184
Tnfrsf19	12.6672	13.3228	5.4647	8.10412	2.46739	7.21126	1.54646	4.56276	3.48102e-48	1.01566e-46	2.92099
Tnfrsf9	0.335336	0.592632	16.1856	14.8583	52.1232	26.2124	-0.99155	6.33269	3.21921e-84	1.57763e-82	0.502937
Tnfsf10	21.9969	24.92	15.6559	29.2631	37.809	57.9012	0.902281	6.84727	5.89592e-85	8.58959e-83	1.86902
Tnfsf13b	14.1409	14.2317	14.167	15.7747	8.12255	14.0846	0.793683	4.27775	5.10216e-13	4.7632e-12	1.73349
Tnfsf9	1.98555	3.06411	39.9146	15.9703	8.37554	8.1685	-1.32106	5.02543	3.3433e-54	3.11305e-52	0.400241
Tnip1	15.8966	13.2165	116.633	91.5835	151.005	63.9825	-1.2388	8.18856	0	0	0.423725
Tnks1bp1	65.9493	64.9219	96.2825	87.924	100.435	65.2679	-0.621799	8.86184	1.20638e-187	1.38903e-185	0.64986
Tomm20	7.99286	8.12465	10.8114	9.61131	9.9153	6.09951	-0.700786	5.28154	3.79262e-21	5.41847e-20	0.615237
Tomm6	53.2107	54.8638	62.105	51.6142	47.0486	86.4325	0.877289	6.11569	1.36039e-52	4.31615e-51	1.83692
Top2a	2.41187	2.86594	1.762	4.39429	1.67857	2.50875	1.31743	4.07841	3.44728e-25	1.50055e-23	2.49222
Tor3a	23.0719	22.9715	20.8921	22.6674	26.508	39.8719	0.588892	6.79204	3.40491e-39	8.37193e-38	1.50409
Tpbg	1.228	1.72855	2.21685	2.00153	3.74882	1.13423	-1.72234	3.05662	2.59586e-24	4.2084e-23	0.303057
Tpcn1	24.9839	24.4013	19.0281	18.2838	11.3503	17.0307	0.585321	6.07422	3.50866e-24	5.64549e-23	1.50037
Tpi1	46.0164	38.3888	32.8224	33.4591	34.453	54.3933	0.658705	6.18666	2.36384e-32	4.83514e-31	1.57867
Tpm2	13.8354	12.6937	15.4932	16.0104	8.12841	14.2542	0.809989	4.59511	1.97762e-16	2.21859e-15	1.7532
Tppp	6.66651	6.19728	4.67758	3.40417	1.18089	3.06921	1.37656	3.50231	8.48357e-20	1.12847e-18	2.59648
Traf1	25.6045	23.9023	22.9199	14.9868	40.9754	26.556	-0.612753	5.42418	4.7113e-17	1.38595e-15	0.653948
Traf3ip2	8.05005	8.36882	12.994	11.3793	12.2545	7.93993	-0.625897	4.82164	8.39705e-13	7.71146e-12	0.648017
Traf6	7.39546	8.31179	13.3965	12.6422	14.1007	9.06561	-0.637193	5.95226	1.06129e-27	1.90675e-26	0.642963
Trappc9	9.23171	8.46984	7.8282	7.65914	4.51642	7.13589	0.659672	4.80593	3.2973e-13	3.12733e-12	1.57972
Trcg1	0.133032	0.333756	1.59947	1.46616	2.20418	0.512871	-2.09584	1.77398	1.46419e-14	1.49319e-13	0.233933
Trem1	0.807616	0.784853	50.4572	40.4224	27.5305	8.92944	-1.62404	5.70295	1.61018e-130	1.26778e-128	0.324426
Trib1	13.5203	12.9915	88.0222	66.8842	49.8551	30.614	-0.703506	7.30199	1.10791e-82	5.33193e-81	0.614078
Trim12c	8.54707	11.3393	9.2452	15.0875	19.3127	23.1737	0.706408	5.54789	2.38984e-22	9.18867e-21	1.63174
Trim21	6.78611	7.35811	4.77938	9.28726	14.6814	23.1296	0.957874	4.34183	1.66835e-17	5.08241e-16	1.94245
Trim30a	9.1388	10.3041	11.0431	17.9723	23.7371	38.8891	0.702488	5.81468	2.267e-26	1.02211e-24	1.62731
Trim30d	2.84579	3.95423	5.71342	7.9387	8.13319	15.0851	0.891015	5.49253	9.80708e-35	2.15193e-33	1.85448
Trp53i11	21.3026	17.8388	21.8949	14.9024	26.7822	15.042	-0.832128	5.75434	1.46835e-39	3.66505e-38	0.5617
Trp53inp1	10.9582	17.8385	30.8485	34.0647	14.0043	7.179	-0.963835	5.79469	1.60913e-53	5.18992e-52	0.512692
Trpv6	2.48149	1.97268	2.50756	2.02821	5.96104	2.58171	-1.20619	3.58134	1.14388e-18	1.44783e-17	0.433413
Tsku	8.14367	8.53397	29.0054	22.2586	31.9052	10.9187	-1.54668	5.80658	1.28985e-128	9.97234e-127	0.342296
Tspan13	108.845	136.437	66.71	80.9063	35.4083	66.8969	0.917756	6.66717	4.82909e-83	2.33453e-81	1.88918
Tspan17	28.1484	29.7691	19.3046	16.9662	14.0118	25.0231	0.836335	4.96764	5.30951e-22	7.85279e-21	1.78551
Tspan18	56.7943	44.0778	47.3204	44.4238	23.1709	39.4668	0.768258	6.91613	2.74821e-70	1.13621e-68	1.70321
Tspan7	331.586	336.285	294.775	257.607	139.204	217.102	0.641155	8.33759	8.00989e-131	6.35333e-129	1.55958
Tspan9	111.762	99.8555	105.74	89.3924	51.2186	85.2794	0.735503	8.10557	2.58924e-145	2.28194e-143	1.66498
Tspyl4	7.91359	8.54409	3.41653	4.31914	2.9496	5.57696	0.918384	4.10236	5.36751e-15	5.58555e-14	1.89
Ttc9	8.45703	9.01645	19.3914	15.1969	11.2934	5.52951	-1.02962	4.04774	5.25189e-19	6.75116e-18	0.489839
Tuba1c	14.2109	12.7744	28.4829	26.998	34.2385	22.0017	-0.637894	5.7625	3.84598e-24	6.16971e-23	0.642651
Tubb1	19.7677	13.4213	14.7844	15.0695	4.80407	11.3405	1.23796	3.56587	1.97098e-17	2.32564e-16	2.35865
Tubb2b	35.1084	25.7513	21.7894	21.2677	19.8277	30.3742	0.615201	5.62452	1.45229e-19	1.91752e-18	1.53177
Tubb5	185.517	156.968	137.688	162.158	141.646	215.689	0.606648	8.91628	1.04464e-174	1.09131e-172	1.52272
Tubb6	33.1129	25.6174	97.9575	72.5529	77.9848	46.5517	-0.74429	6.72296	1.93261e-62	7.18555e-61	0.596961
Txnip	357.198	366.942	381.05	402.973	388.747	218.974	-0.828065	9.68906	0	0	0.563284
Txnrd1	21.6834	23.004	170.799	124.202	84.4551	49.2829	-0.777063	7.88329	1.28298e-149	1.15934e-147	0.583554
Uap1l1	30.3114	24.5583	18.7957	22.7596	21.771	37.4884	0.783878	5.6866	2.3998e-31	4.76313e-30	1.72175
Uba7	28.8031	24.7996	20.9683	32.3095	50.6304	98.8088	0.623667	6.43325	2.87727e-32	1.63447e-30	1.54079
Ubd	0.00323564	0.0848401	0.529795	2.78431	4.70509	11.9029	1.3371	3.02531	4.13313e-14	4.12274e-13	2.52643
Ube2l6	26.2826	25.2373	22.0569	37.1602	40.2638	89.2942	0.752326	5.40403	9.17392e-23	3.59175e-21	1.68451
Uchl1	5.02044	5.11909	19.3595	15.2328	22.6995	7.39383	-1.61715	4.02757	1.56782e-41	4.01151e-40	0.325978
Uchl3	4.45317	4.77194	6.17059	5.55538	13.2306	6.09697	-1.11638	3.10877	2.66914e-12	2.36697e-11	0.461249
Uck2	9.40472	7.63429	13.8614	13.1238	21.6886	12.91	-0.748121	4.48925	2.35388e-14	2.37562e-13	0.595379
Ugcg	15.587	17.1223	32.0066	34.3735	44.5859	20.1824	-1.14339	6.85223	4.51636e-159	4.24221e-157	0.452694
Ugt1a10	11.9375	11.5636	14.2874	12.8615	7.36031	11.3419	0.623617	4.95463	3.9213e-13	3.69787e-12	1.54073
Ugt1a1	12.0025	11.6812	14.4595	12.9132	7.53169	11.4589	0.605224	4.96999	1.51491e-12	1.36661e-11	1.52122
Ugt1a2	12.1228	11.7233	14.5055	13.0661	7.47865	11.4118	0.609471	4.95226	1.35269e-12	1.22491e-11	1.5257
Ugt1a5	12.1153	11.6862	14.5349	13.0579	7.49182	11.4334	0.609661	4.95582	1.16876e-12	1.06421e-11	1.5259
Ugt1a9	12.0255	11.6749	14.4029	12.9654	7.47318	11.4049	0.609661	4.95582	1.16876e-12	1.06421e-11	1.5259
Uhrf1	1.27522	1.74644	1.50381	1.96086	0.97849	4.24692	2.1147	3.31522	1.37936e-33	2.92478e-32	4.331
Ulk1	20.7455	19.981	29.0924	22.3365	24.9197	16.2277	-0.61877	6.70684	4.16818e-43	1.10205e-41	0.651226
Unc13b	10.1823	9.56139	8.51514	7.75305	5.09911	7.65545	0.586097	5.37589	2.7805e-15	2.93915e-14	1.50118
Unc13d	30.1848	29.4238	20.8954	22.6025	17.1497	26.2261	0.612749	6.45902	7.40854e-34	1.58503e-32	1.52917
Uqcr11	80.5299	62.0896	79.2203	61.7667	52.7612	84.0188	0.671008	4.9331	1.04122e-14	1.06743e-13	1.59219
Urb1	3.49091	3.30967	4.3548	3.46651	4.44407	2.6091	-0.768026	4.65772	1.21708e-16	1.38276e-15	0.58722
Ushbp1	60.0114	55.0107	34.0437	35.9657	19.6049	38.0132	0.955191	6.7247	4.2653e-93	2.31842e-91	1.93884
Usp18	10.9582	11.4539	6.09591	13.3534	26.1382	43.8127	1.13053	4.17022	1.17793e-20	4.18352e-19	2.18939
Usp43	4.63194	4.32766	9.56542	7.64692	7.98938	4.68866	-0.76863	4.7807	4.57317e-18	5.59012e-17	0.586975
Utp20	2.27518	2.32083	1.71136	2.64515	3.79056	2.36902	-0.677868	4.72887	5.80877e-14	5.73539e-13	0.625088
Vangl1	9.69507	8.6416	6.31617	7.42717	5.57518	9.08636	0.7044	4.68374	1.25298e-13	1.21972e-12	1.62947
Vash1	15.0257	15.447	24.6738	22.5343	16.0494	9.7082	-0.725156	6.27775	4.98601e-44	1.34654e-42	0.604932
Vcan	0.765216	0.602996	1.57283	2.32147	5.41257	3.17638	-0.768782	5.69729	8.3167e-33	1.72923e-31	0.586913
Vegfa	290.139	302.367	228.803	239.836	189.381	284.161	0.585411	9.73783	1.17337e-286	2.16629e-284	1.50047
Vim	453.483	374.929	328.645	391.265	292.789	482.954	0.722013	9.51208	0	0	1.64948
Vipr2	5.74133	6.6985	4.44647	4.57709	0.524883	2.39649	2.18471	2.40138	3.22057e-19	4.1801e-18	4.54635
Vkorc1	47.5628	38.1846	34.3861	33.1644	14.2316	28.7698	1.01479	4.05883	3.4053e-17	3.96133e-16	2.02061
Vnn3	3.55804	2.68275	13.9982	10.7402	19.7793	12.1372	-0.704304	4.81511	1.06852e-15	1.15282e-14	0.613739
Vps13c	3.89614	3.9369	2.36593	2.6428	2.12048	3.23903	0.610972	4.98052	7.75577e-13	7.14706e-12	1.52729
Wars	74.1086	70.6912	89.8641	154.232	279.169	666.461	0.779258	8.4783	6.17155e-196	2.20283e-193	1.71625
Wbp1	42.0771	41.6346	30.8156	28.6787	19.0166	29.1955	0.618298	5.02531	1.76595e-13	1.70358e-12	1.53506
Wbp5	69.139	85.9304	61.5551	93.3404	112.243	148.364	0.600542	6.33652	3.06063e-28	1.53146e-26	1.51629
Wdr43	6.40372	7.51423	12.4964	12.4497	14.9931	8.5213	-0.81495	5.29848	3.9267e-28	7.13267e-27	0.568428
Wdr46	7.08105	5.0012	5.61583	6.31224	12.5339	7.73015	-0.696949	4.41698	4.49557e-12	3.93611e-11	0.616875
Wdr6	42.2159	37.0786	26.7982	24.7423	15.4513	24.7494	0.679582	6.39746	2.03373e-39	5.01778e-38	1.60168
Wfdc1	33.5049	34.8493	28.0167	19.4869	2.79242	7.56999	1.43606	2.6679	1.44014e-12	1.30025e-11	2.70582
Whsc1	2.19222	2.30214	1.53628	2.8004	2.35073	2.27749	0.865616	4.1284	6.97159e-13	1.52662e-11	1.82212
Wisp2	44.6554	37.9426	8.72283	19.2228	74.2052	124.286	1.13942	4.69689	1.55746e-29	8.05667e-28	2.20292
Wnt11	3.76607	3.26477	6.63738	4.60521	7.04022	2.09989	-1.74363	3.58441	2.26526e-35	5.09054e-34	0.298618
Wnt3a	8.30979	7.76279	1.18928	3.29891	2.20572	5.71225	1.46894	2.7059	2.24566e-12	4.70579e-11	2.76819
Wnt5a	4.80978	5.29114	1.9271	3.30352	2.41864	4.50866	0.897884	3.96056	3.9858e-13	3.75538e-12	1.86333
Xist	0.283138	0.243411	1.58003	5.43505	0.201342	0.267595	1.78196	6.06738	2.29721e-156	6.64826e-154	3.43892
Xpo1	9.51089	11.9777	4.68843	8.18097	7.39729	10.7937	0.8029	5.09565	5.6211e-21	2.02322e-19	1.7446
Yipf1	22.4128	19.176	17.9165	18.8378	16.7949	25.758	0.616776	4.84617	5.05628e-12	4.41441e-11	1.53344
Zbp1	3.18771	2.14689	6.05401	17.5848	32.2809	87.3504	1.53754	4.63693	9.0438e-47	7.42077e-45	2.90299
Zbtb16	18.6612	39.1032	68.9097	67.3562	55.7845	27.8849	-1.00033	7.68821	2.07024e-216	2.80609e-214	0.499885
Zbtb46	7.07903	7.18725	18.3954	10.5521	5.71167	7.55201	-0.801579	5.1713	9.1797e-24	3.74462e-22	0.573721
Zbtb48	7.75798	7.32652	16.5418	11.9897	23.8542	8.44627	-1.49738	5.0916	1.18731e-74	5.21054e-73	0.354197
Zc3h12a	5.37495	5.38486	152.26	95.3963	103.704	42.7082	-0.674514	8.39918	1.14469e-151	3.22562e-149	0.626543
Zfp36	68.6194	82.4977	1020.6	618.754	222.026	136.11	-0.721971	10.4548	0	0	0.606269
Zfp46	12.1998	10.5047	185.007	99.0222	28.6148	13.5239	-0.901741	9.30877	0	0	0.53524
Zfp52	1.42153	1.58388	2.02814	1.98369	5.64299	1.95228	-1.52982	3.50879	4.78506e-27	8.44821e-26	0.346321
Zfp598	33.8695	31.1957	76.5531	59.2978	57.0777	32.0441	-0.832807	7.15006	4.70291e-104	2.87764e-102	0.561436
Zfp641	10.6636	10.1599	7.65751	7.55531	10.8895	7.02551	-0.632066	5.00596	1.09485e-14	1.12081e-13	0.645252
Zfp653	10.7145	8.78856	13.7814	7.60165	13.7626	9.83706	-0.857912	4.44226	7.02886e-17	2.04803e-15	0.551751
Zfp703	34.2075	36.2082	80.3161	64.2459	65.6132	39.9832	-0.714552	7.40877	1.13356e-91	6.11493e-90	0.609394
Zfp872	0.547307	0.336843	1.6262	1.15853	4.44686	1.43307	-1.63144	3.03881	5.16423e-22	7.64848e-21	0.322765
Zfp949	3.57463	5.52188	3.2459	9.08092	4.27121	2.89946	1.48336	4.51068	1.3902e-40	9.63513e-39	2.796
Znhit1	23.373	25.5278	24.2659	24.4586	23.5103	38.0858	0.695738	5.02644	1.52361e-16	1.72188e-15	1.61971
Zranb2	15.737	23.8448	11.3881	18.6693	19.9043	20.2027	0.712944	5.33894	7.64142e-20	2.58938e-18	1.63915
Zswim4	11.6681	9.54103	39.6032	26.7816	29.5693	15.5142	-0.930408	6.56549	5.07496e-87	2.57548e-85	0.52471
