# Supplementary material for: IL-21/type I interferon interplay regulates neutrophil-dependent innate immune responses to Staphylococcus aureus
Source: eLife. 2019 Apr 16;8:e45501. doi: 10.7554/eLife.45501 (PMC6504231; doi:10.7554/eLife.45501)
Supplement: Supplementary file 4. [file elife-45501-supp4.xlsx]

## Sheet: Supplementary.Tables.IL21RFc
symbol	WT_Cont	Ig_4h	IL21RFc_4h	logFC	logCPM	PValue	FDR	ratio
S100a8	12.4677	175.276	546.477	1.64042	7.135	0	0	3.11757
S100a9	39.9745	395.556	1041.33	1.39644	8.4456	0	0	2.63251
Jund	239.005	370.195	223.177	-0.730091	9.74228	0	0	0.602866
Mt1	67.2823	838.867	1334.64	0.669928	9.19807	4.04518e-282	1.10383e-278	1.59099
Retnlg	3.95053	156.92	373.988	1.25289	7.32708	6.33444e-265	1.53645e-261	2.38319
Car3	28.899	67.1982	13.9222	-2.2706	5.9662	1.18823e-259	2.59392e-256	0.207244
Cebpd	90.2073	350.423	230.899	-0.601831	9.36319	4.36521e-254	8.66297e-251	0.658917
Smad6	133.586	142.65	85.4143	-0.739917	8.40872	9.56468e-198	1.39198e-194	0.598774
Irg1	0.125908	21.9967	55.0812	1.32415	6.63231	7.48173e-183	9.60743e-180	2.50386
Clca3	2.14341	25.0713	5.83629	-2.1024	5.51423	9.26575e-170	1.12373e-166	0.232871
Pck1	8.10532	19.7311	3.21803	-2.61507	4.92036	4.56408e-155	5.24389e-152	0.163224
Il1r2	1.06998	33.976	85.0625	1.32386	6.31296	7.58469e-147	7.19886e-144	2.50334
Cfd	64.4095	102.32	34.324	-1.57556	5.98748	1.21203e-146	1.10244e-143	0.335513
Cxcr2	1.77906	21.2621	46.0808	1.11578	6.67227	4.01547e-135	3.37145e-132	2.16713
Rpl13a	212.183	288.043	174.926	-0.719518	7.89615	8.05862e-132	6.51555e-129	0.6073
Retnla	59.6614	250.051	125.814	-0.990852	6.81814	2.41622e-117	1.50703e-114	0.503181
Mmp8	0.645409	29.6238	58.153	0.97302	6.74442	6.17373e-109	3.54665e-106	1.96295
Il1b	3.61691	134.731	212.456	0.657051	7.84369	2.23115e-107	1.24887e-104	1.57686
Cd300lf	3.81822	34.6826	68.1138	0.973651	6.59231	2.44664e-98	1.27167e-95	1.9638
Sox18	134.176	105.064	59.4029	-0.822607	7.06167	9.40222e-97	4.66478e-94	0.565419
Plek	9.20569	29.6357	49.0393	0.726565	7.33496	2.13935e-92	1.01526e-89	1.65469
Irx3	49.1277	62.3196	34.4159	-0.856548	6.8417	4.51844e-90	2.05495e-87	0.552273
Gp49a	2.82644	37.5551	76.6922	1.02995	6.21383	9.86842e-85	4.30855e-82	2.04196
Igfbp2	179.897	155.361	98.7697	-0.653452	7.40154	4.23654e-78	1.71266e-75	0.635757
Lilrb4	4.53956	31.4299	64.4025	1.03485	6.08003	4.34526e-78	1.72467e-75	2.0489
Hspa1a	43.789	17.6194	5.96285	-1.56263	5.05267	1.21531e-76	4.73752e-74	0.338533
Cidec	10.6885	24.143	7.03997	-1.77728	4.73948	2.01492e-76	7.7168e-74	0.291733
Mmp9	3.52249	27.2411	45.9645	0.75468	6.83954	4.42262e-71	1.53247e-68	1.68726
Zfp503	33.5862	39.7672	24.6135	-0.692089	7.08757	1.47993e-70	4.97028e-68	0.618957
Hdc	26.3034	60.5865	91.624	0.596702	7.49598	2.57998e-70	8.4061e-68	1.51226
Ier5	25.4861	65.4095	43.2603	-0.596426	7.47671	6.96146e-69	2.23483e-66	0.66139
Mir5109	1865.05	1896.33	1183.38	-0.68025	7.06983	1.94558e-67	5.98196e-65	0.624057
Hspa1b	42.4886	16.96	6.41297	-1.40267	5.04522	2.00648e-63	5.76335e-61	0.378228
Gas1	24.4415	24.936	12.3475	-1.01386	5.87302	3.67584e-62	1.04212e-59	0.495218
Lzts2	57.2299	67.817	45.1165	-0.587961	7.32114	2.44479e-60	6.75566e-58	0.665282
Sox17	43.5631	26.4093	13.7113	-0.945549	5.978	1.22569e-58	3.3446e-56	0.519232
Slc2a3	4.77968	11.2573	21.1918	0.912529	5.99965	4.08582e-58	1.10115e-55	1.88234
C2cd4b	5.19169	34.0177	13.2143	-1.36378	4.98079	1.02276e-57	2.68999e-55	0.388562
Csf2rb	8.30357	22.7684	34.9539	0.618382	7.0997	1.12476e-57	2.92305e-55	1.53515
Sox4	61.3341	38.3908	22.5784	-0.765742	6.49676	1.60096e-57	4.11164e-55	0.588151
Ifitm6	2.54807	12.2342	46.8498	1.93583	3.98748	6.04924e-54	1.39005e-51	3.82599
Cxcl3	0.148477	23.1676	52.2843	1.174	5.24903	8.00303e-54	1.80109e-51	2.25636
Mrfap1	93.1773	102.074	67.7472	-0.591346	7.11632	3.66741e-53	8.00597e-51	0.663723
Gda	3.92505	12.2381	20.3215	0.731552	6.45798	8.90135e-52	1.88657e-49	1.66042
Ccr1	1.05501	14.9411	27.7125	0.89112	5.91043	1.01215e-50	2.10432e-48	1.85462
Cd33	2.07155	12.3019	24.2775	0.980559	5.54929	1.44556e-47	2.76812e-45	1.97323
Fabp4	21.1272	61.996	25.4105	-1.28633	4.81533	9.86312e-47	1.84027e-44	0.409992
Trem1	0.861972	16.0791	27.466	0.772361	6.03611	2.58263e-43	4.4046e-41	1.70806
Cyp2e1	6.04926	14.7704	4.87781	-1.59749	4.10073	5.89251e-42	9.74495e-40	0.330452
Dbp	19.7808	72.6254	47.8163	-0.602921	6.66256	9.69774e-41	1.56816e-38	0.65842
Ppp1r14a	119.558	130.394	74.204	-0.81318	5.76823	1.39174e-38	1.98574e-36	0.569126
Pura	62.8486	57.9338	36.3279	-0.673252	6.24159	5.75493e-38	8.05322e-36	0.627092
Irf2bp1	35.4606	31.1096	19.0551	-0.707097	6.08523	1.50188e-37	2.06201e-35	0.612551
2310036O22Rik	102.15	111.776	72.1389	-0.631701	6.36179	1.88956e-36	2.48489e-34	0.645415
Nrarp	31.0022	21.2265	11.4768	-0.886965	5.40113	1.55912e-35	1.92292e-33	0.54075
Scand1	61.4105	73.1258	40.1878	-0.863453	5.43331	1.60235e-34	1.95414e-32	0.549635
Adam8	9.07035	21.8663	33.2646	0.605221	6.38223	2.65679e-34	3.18669e-32	1.52121
Pygl	10.6259	16.0039	26.2492	0.713752	5.89274	6.56993e-34	7.75252e-32	1.64006
Adipoq	6.48283	12.6615	3.29773	-1.9388	3.30718	1.56825e-33	1.80184e-31	0.260833
Cd177	2.33949	7.9535	15.7765	0.987852	5.00296	1.78409e-33	2.03909e-31	1.98323
Fgr	4.77842	11.862	19.9356	0.748876	5.72689	1.28866e-32	1.40658e-30	1.68048
Rtkn2	52.9938	17.9161	10.8391	-0.724899	5.82531	1.43712e-32	1.54544e-30	0.605039
Sla	7.02004	12.536	21.5234	0.779695	5.57466	7.46586e-32	7.76094e-30	1.71677
Clec4e	0.257044	12.3067	21.7528	0.821595	5.41772	1.97794e-31	2.0083e-29	1.76736
Slc27a1	23.3415	24.0297	14.5579	-0.722909	5.75719	6.10347e-31	6.08397e-29	0.605874
Maf	19.9203	16.3732	9.62294	-0.76665	5.56947	1.97704e-30	1.95288e-28	0.587781
Il1rn	0.838821	20.307	31.6946	0.642178	6.0068	5.89274e-30	5.71726e-28	1.56068
Plin1	4.9926	8.5446	2.66295	-1.68043	3.43331	3.01576e-29	2.81342e-27	0.311989
Clec4d	1.33823	16.8075	31.3822	0.900599	5.00296	2.521e-28	2.24626e-26	1.86684
Lmnb1	9.37816	12.2585	20.4504	0.73822	5.53491	6.29955e-28	5.50077e-26	1.66812
Rarg	39.1959	27.6757	18.1909	-0.605324	6.06747	1.02325e-27	8.82903e-26	0.657324
Nlrp3	1.03366	13.5332	20.4589	0.596155	6.09094	1.56809e-27	1.33716e-25	1.51168
Cyth2	18.4809	25.0497	15.6709	-0.676597	5.68911	3.27962e-26	2.67142e-24	0.625639
Capn12	7.1048	18.4568	10.9751	-0.749767	5.3835	7.06589e-26	5.65012e-24	0.5947
Has1	2.81144	32.8663	21.177	-0.634016	5.82469	8.74014e-26	6.96341e-24	0.64438
Fcgbp	1.31322	2.60027	1.0491	-1.30868	3.86215	1.30199e-25	1.03354e-23	0.40369
Glrx5	53.329	53.8923	31.8304	-0.759513	5.32136	1.94526e-25	1.52752e-23	0.590696
Il18rap	1.12134	4.01051	9.21844	1.20008	4.02911	7.22699e-25	5.53562e-23	2.29752
Cd300ld	1.75423	5.11523	10.8923	1.08994	4.2784	8.06079e-25	6.15269e-23	2.12866
Nab2	18.1477	16.9703	9.74689	-0.799801	5.10893	2.29341e-24	1.72045e-22	0.574428
H3f3a	16.1188	24.5931	11.6877	-1.07278	4.29286	4.79715e-24	3.52599e-22	0.475402
4930413G21Rik	11.1402	21.9395	11.3	-0.95685	4.54778	3.32063e-23	2.34593e-21	0.515181
Dact3	18.0028	9.80109	4.84949	-1.01468	4.37842	3.71647e-23	2.61711e-21	0.494937
Ccl2	0.259166	60.7458	36.9116	-0.718556	5.30272	1.0298e-22	7.11412e-21	0.607705
Lif	1.11532	14.4793	9.24671	-0.646869	5.57762	1.85716e-22	1.25129e-20	0.638665
Ndufc2	51.3594	67.2876	40.2709	-0.740432	5.19903	2.16978e-22	1.45295e-20	0.59856
Thrsp	8.87759	18.6559	7.87178	-1.24406	3.79006	2.26755e-22	1.51378e-20	0.422184
Mex3d	20.0334	13.1904	7.80992	-0.755922	5.10073	6.76061e-22	4.37935e-20	0.592168
Tomm6	56.7719	63.34	41.6843	-0.603519	5.72822	8.36049e-22	5.35218e-20	0.658147
Fcgr3	10.9818	17.2387	29.6709	0.783194	4.98303	9.31618e-22	5.92922e-20	1.72094
Gpd1	17.6088	15.5693	9.33183	-0.738294	5.12012	3.72773e-21	2.30528e-19	0.599448
Fam65b	6.59787	6.99537	10.6902	0.611717	5.62554	4.65993e-21	2.84947e-19	1.52808
Slc11a1	3.55535	8.06961	14.5668	0.851836	4.69933	4.70285e-21	2.86769e-19	1.8048
Otud1	18.9866	22.9108	14.9539	-0.615396	5.58498	1.50758e-20	8.94305e-19	0.652751
Mefv	0.442286	1.97771	4.92186	1.3143	3.47829	2.99328e-20	1.74715e-18	2.48682
Trpm2	0.606077	3.3376	5.58677	0.743009	5.01936	3.24207e-20	1.8823e-18	1.67366
Tet2	4.08985	4.20749	6.38345	0.601274	5.5996	4.95998e-20	2.81237e-18	1.51706
G0s2	59.8039	24.4032	42.1023	0.786592	4.80401	1.60274e-19	8.85767e-18	1.72499
Lgals1	85.9356	67.7193	44.1178	-0.618093	5.48697	1.74581e-19	9.62401e-18	0.651532
Tysnd1	24.241	20.0027	12.4947	-0.678729	5.21905	1.98252e-19	1.09014e-17	0.624715
Ngp	2.42144	12.1466	22.982	0.91956	4.34411	3.84756e-19	2.08417e-17	1.89154
Rnf125	7.56533	9.26847	18.1464	0.968825	4.1865	5.46526e-19	2.93859e-17	1.95725
Celsr3	0.167496	0.364133	1.03767	1.50903	3.00735	6.02138e-19	3.19822e-17	2.84619
Tlr13	1.50896	4.69202	8.20091	0.805312	4.68843	6.28018e-19	3.32758e-17	1.74752
C1qc	36.8458	51.0334	33.6738	-0.599703	5.48382	2.05136e-18	1.04629e-16	0.65989
Myl4	47.4584	50.8009	32.1794	-0.658568	5.19903	3.06604e-18	1.53866e-16	0.633507
Rgs16	0.415049	17.5566	10.8971	-0.687901	5.05797	4.74727e-18	2.34995e-16	0.620756
1810033B17Rik	5.16987	10.112	19.8542	0.972882	4.07795	6.10677e-18	2.99575e-16	1.96276
Mrgpra2a	0.0505936	1.95178	6.91434	1.82138	2.4463	8.38146e-18	4.04795e-16	3.53418
Ranbp1	37.9626	55.7661	36.0806	-0.628031	5.29376	9.95281e-18	4.79624e-16	0.647059
Dmxl2	1.82965	2.31119	3.74028	0.694331	5.00075	1.03014e-17	4.95329e-16	1.61813
Clec11a	12.7986	9.55467	4.53161	-1.0755	3.79006	1.81815e-17	8.6096e-16	0.474508
E130012A19Rik	2.85055	11.668	6.48078	-0.847975	4.40695	4.04748e-17	1.85623e-15	0.555564
Lilrb3	2.86342	7.87729	13.0103	0.723676	4.8278	4.63728e-17	2.12024e-15	1.65138
N4bp3	31.4703	17.328	11.1631	-0.634227	5.19903	4.64257e-17	2.12024e-15	0.644286
Glipr2	14.0647	16.6218	25.0071	0.58914	5.3894	5.36735e-17	2.43595e-15	1.50435
1810055G02Rik	10.645	12.8293	20.6208	0.684482	4.97183	5.49685e-17	2.48955e-15	1.60712
Srsf9	48.7452	37.8723	24.8695	-0.606637	5.29914	9.88618e-17	4.4044e-15	0.656726
Muc6	2.84652	2.09892	3.63024	0.790135	4.54325	1.06999e-16	4.74752e-15	1.72924
Spef1	22.2034	21.6686	14.3869	-0.590727	5.35449	1.34517e-16	5.93232e-15	0.664008
Serpina3c	6.66377	14.9153	23.52	0.656926	5.01718	3.36677e-16	1.44678e-14	1.57672
Ptafr	2.54077	7.98724	14.2798	0.837852	4.3354	3.59462e-16	1.53563e-14	1.78739
Uba52	37.8909	44.1846	23.4536	-0.913268	4.06747	1.1521e-15	4.74536e-14	0.530981
Dhrs9	0.188332	1.23551	3.48038	1.492	2.72222	2.18182e-15	8.70733e-14	2.81278
Fpr2	2.77838	10.5461	18.8694	0.838972	4.24717	2.69983e-15	1.06577e-13	1.78878
Fdx1	24.9662	48.8466	31.9669	-0.611534	5.12417	3.56325e-15	1.39651e-13	0.6545
Pias4	25.1286	22.6188	14.4374	-0.647541	4.94918	4.92775e-15	1.90058e-13	0.638367
Irx5	14.9566	11.1528	6.46928	-0.785415	4.40862	5.35597e-15	2.05485e-13	0.580185
Btla	7.24136	7.15017	11.2467	0.653273	4.89096	7.37479e-15	2.79986e-13	1.57273
Arg2	2.02524	17.0734	26.5843	0.638657	4.9469	8.13214e-15	3.06605e-13	1.55688
Ccl7	0.261436	26.6535	14.4388	-0.883916	4.04201	1.49205e-14	5.5206e-13	0.541894
Alb	1.60506	0.994618	3.44225	1.7871	2.16897	1.9615e-14	7.17244e-13	3.4512
Entpd3	1.50898	3.21808	5.96587	0.890051	3.98079	2.19473e-14	7.98517e-13	1.85324
Dyrk1b	17.4531	14.85	9.58644	-0.631224	4.94804	2.30423e-14	8.36961e-13	0.645628
Bcl7c	22.6998	24.37	13.8014	-0.81991	4.20765	2.57085e-14	9.30708e-13	0.566477
Hoxb4	9.19768	12.5517	7.81361	-0.683601	4.71149	2.69943e-14	9.75416e-13	0.622609
Nlrp12	0.460281	3.11263	5.46613	0.812014	4.20955	3.85604e-14	1.3777e-12	1.75566
Tbca	37.9686	50.305	29.4299	-0.773095	4.33015	5.8573e-14	2.05902e-12	0.585161
Gm16517	37.9022	36.4009	24.1445	-0.592134	5.0622	8.29001e-14	2.87712e-12	0.663361
Il17d	8.52193	8.85364	3.64875	-1.27735	2.94002	8.73208e-14	3.0114e-12	0.412554
Rps19	36.4526	49.8996	31.1674	-0.67877	4.67607	8.85647e-14	3.04467e-12	0.624698
Hdac4	6.39254	6.23996	9.51308	0.608213	4.95147	1.2424e-13	4.19838e-12	1.52437
Phpt1	46.3004	40.752	23.6087	-0.787203	4.23412	1.36301e-13	4.59176e-12	0.579467
Aoc3	2.91436	4.92131	2.75944	-0.834247	4.08211	1.52687e-13	5.1122e-12	0.560876
Rab44	2.57247	4.78796	7.62123	0.670394	4.66638	1.57255e-13	5.25709e-12	1.59151
Doc2b	0.221413	4.95988	7.75465	0.644557	4.75	2.55788e-13	8.4094e-12	1.56326
Treml2	4.30042	4.01632	6.47734	0.689287	4.55979	2.86101e-13	9.37775e-12	1.61249
Zfp407	3.58348	2.18624	3.55557	0.701371	4.50027	3.87926e-13	1.26206e-11	1.62605
Tnfsf9	2.11919	22.6915	13.9667	-0.699907	4.49871	4.5422e-13	1.46464e-11	0.615612
Afmid	2.81049	5.0742	8.97969	0.82306	4.02911	4.55618e-13	1.46698e-11	1.76915
Mrgpra2b	0.0265437	2.57066	6.87766	1.41755	2.56427	6.75267e-13	2.1426e-11	2.67131
Bri3	32.8581	37.0047	24.3151	-0.60569	4.88739	6.79983e-13	2.15443e-11	0.657157
Ppp1r35	19.249	18.1034	9.49236	-0.930806	3.70069	7.25955e-13	2.29343e-11	0.524565
Cd59a	7.23157	19.9503	13.1974	-0.595993	4.90867	1.00504e-12	3.12536e-11	0.661589
C1qtnf5	6.99133	6.21257	3.79851	-0.709482	4.42348	1.03996e-12	3.22477e-11	0.61154
Mfrp	6.99133	6.21257	3.79851	-0.709482	4.42348	1.03996e-12	3.22477e-11	0.61154
Samsn1	2.14182	11.3333	17.5201	0.62825	4.73021	1.625e-12	4.93377e-11	1.54569
Phyhd1	12.473	17.7026	26.5981	0.587201	4.90161	2.12385e-12	6.3774e-11	1.50233
Exosc5	19.1196	19.5319	11.1417	-0.809431	3.98748	3.34979e-12	9.82876e-11	0.570607
