# Supplementary material for: IL-21/type I interferon interplay regulates neutrophil-dependent innate immune responses to Staphylococcus aureus
Source: eLife. 2019 Apr 16;8:e45501. doi: 10.7554/eLife.45501 (PMC6504231; doi:10.7554/eLife.45501)
Supplement: Supplementary file 5. [file elife-45501-supp5.xlsx]

## Sheet: Cont.PT1.vs.Combo.PT1.p0.05.FC1
symbol	Cont.ND1	IL21.ND1	IFNb.ND1	Combo.ND1	Cont.PT1	IL21.PT1	IFNb.PT1	Combo.PT1	logFC	logCPM	PValue	FDR
SOCS1	0.685516	1.1847	60.2487	74.0746	2.68596	3.20403	1087.82	1042.94	8.60086	8.43243	6.15307e-62	6.30505e-58
USP18	0.0382806	0.0011461	34.7876	38.4314	0.463267	0.5842	216.128	189.98	8.67931	6.93319	3.3487e-60	1.71571e-56
CXCL10	0.0516342	0.0221365	41.4619	32.2848	0.0929026	0.0843759	98.5723	90.9941	9.93189	5.32435	1.58912e-59	5.42791e-56
PPA1	0.814357	1.11589	19.5358	20.1283	0.525803	0.643553	114.996	113.444	7.7526	5.46407	1.5207e-50	3.89564e-47
SSB	1.75821	1.30916	44.8284	45.4483	2.16303	2.00982	292.98	320.263	7.20996	7.49472	1.83686e-49	3.76446e-46
CD69	0.596562	0.756858	30.2805	24.5937	1.79474	1.42725	365.298	272.957	7.24861	7.1915	2.24573e-49	3.83533e-46
UBE2S	1.62627	2.48943	44.7049	60.2639	3.87256	3.14501	397.508	528.673	7.09285	7.27774	2.15645e-48	3.15674e-45
MRPL17	0.103192	0.0633332	4.4172	5.63803	0.0633342	0.0574912	16.2292	22.0488	8.44052	3.84655	5.87969e-48	7.53115e-45
TRIB2	0.295532	0.511103	12.1382	10.0274	0.184674	0.228103	33.7914	27.9916	7.24333	5.55188	1.59741e-46	1.81874e-43
IDO1	3.63289	4.03728	65.7088	64.9452	8.64325	8.84591	974.897	952.669	6.78423	8.97406	3.36216e-46	3.44521e-43
PPM1K	0.475095	0.462967	22.944	18.9744	0.800613	0.862554	101.249	83.8379	6.71027	7.56332	5.24494e-45	4.8859e-42
HESX1	0.014873	0.00198833	5.30614	4.38987	0.0334283	0.101716	27.558	23.1035	9.42147	3.14975	3.41208e-44	2.91363e-41
ISG15	9.67084	12.1856	2037.77	2777.96	163.827	130.433	10361.8	14558.9	6.47358	11.2888	1.30424e-43	1.02804e-40
TTC38	1.17641	1.14069	39.7706	45.3653	1.18074	1.01895	129.173	112.262	6.57089	6.7552	2.95476e-43	2.16267e-40
ANXA2R	0.383864	0.273722	11.4253	15.6994	1.98271	1.73107	138.382	180.786	6.51049	5.7943	1.79688e-42	1.22751e-39
ANKRD22	0.824005	0.793771	32.6075	31.9169	2.76443	3.17673	213.436	227.972	6.36569	7.99807	2.85863e-42	1.83077e-39
GIMAP8	0.97878	0.755097	24.9104	23.8837	1.05752	1.27777	92.7662	87.236	6.36607	6.92933	9.31897e-42	5.61715e-39
CASP5	3.40419	3.61176	90.4101	90.4846	3.94227	4.3142	265.75	295.141	6.22616	7.1377	1.03366e-40	5.88442e-38
IFIT1	5.64441	5.78459	1704.56	1642.59	49.3005	50.7905	3595.75	3490.42	6.14565	12.5703	1.22962e-40	6.63153e-38
ATF3	0.61515	1.17516	23.6487	25.2515	2.89012	2.80139	220.074	206.274	6.15722	7.17029	3.70785e-40	1.89972e-37
CNP	0.764526	0.918525	44.1615	53.0957	1.33521	1.20692	94.0694	94.0516	6.13825	7.5626	5.21545e-40	2.54489e-37
CACNA1A	0.105214	0.0870496	3.14146	3.5907	0.252077	0.234281	14.1015	18.4178	6.19089	5.43078	2.5653e-39	1.19485e-36
STOML1	0.175277	0.137096	10.0737	12.544	0.33263	0.316968	27.8962	29.4644	6.4683	4.45628	2.79162e-39	1.24373e-36
TMEM150B	0.0947196	0.0649659	2.80754	4.18296	0.133818	0.223606	26.1639	24.5956	7.5186	2.83903	9.98551e-39	4.2634e-36
BATF3	0.418352	0.5788	6.68355	10.121	0.491091	0.717853	39.2276	46.512	6.56455	3.68375	1.76378e-38	7.22939e-36
LAMP3	0.814967	0.497415	55.9392	40.6114	1.92689	2.35661	162.46	120.039	5.96102	7.32771	2.2943e-38	8.83723e-36
MT2A	3.97337	4.96377	183.069	243.004	50.1312	40.0892	2290.8	2985.74	5.89621	8.24731	2.32854e-38	8.83723e-36
TFEC	0.275553	0.163641	10.9418	5.89604	0.71316	0.733657	68.6691	44.8632	5.97507	6.79137	2.60937e-38	9.54936e-36
IFIT1B	0.231108	0.206894	55.1905	48.9393	1.14197	1.4503	99.8376	76.4584	6.06489	6.1268	2.76778e-38	9.77979e-36
TTC26	0.303999	0.19913	12.9291	9.41856	0.277153	0.2628	24.8793	19.997	6.17259	5.20875	5.34366e-38	1.82522e-35
HERC5	3.13253	2.76113	744.716	564.753	17.9527	20.1893	1270.84	1036.39	5.85122	10.6527	5.6682e-38	1.87361e-35
41885	0.0382934	0.0313254	3.98001	4.93683	0.509585	0.503199	34.6342	34.0505	6.06185	4.57853	4.97717e-37	1.59378e-34
ST3GAL5	0.508577	0.315783	2.64288	2.17034	0.101615	0.225483	12.0199	11.5228	6.8234	3.13611	5.20087e-37	1.61495e-34
HELB	0.197363	0.286605	4.97894	3.18509	0.194693	0.366253	20.5848	14.7967	6.2473	4.33132	5.77631e-37	1.74088e-34
DHX58	1.88939	1.86572	122.466	144.448	6.08164	5.95878	332.832	328.879	5.75693	8.27123	6.77475e-37	1.98345e-34
RIN2	0.17154	0.273267	2.5665	2.06699	0.0987089	0.0375964	11.5499	8.57403	6.43966	3.83584	1.01372e-36	2.88543e-34
UBFD1	0.285522	0.309601	8.27419	6.98401	0.105179	0.142814	9.5011	8.52999	6.34077	4.3957	1.04947e-36	2.90647e-34
VAMP5	1.52624	1.57477	25.3934	38.4877	11.705	7.49226	439.059	626.362	5.74174	6.5809	1.68903e-36	4.5546e-34
RANGAP1	0.944493	1.01388	19.9798	24.9274	1.24113	1.21312	63.5413	67.5301	5.76573	6.61776	1.73554e-36	4.56002e-34
BATF2	0.587277	0.638709	62.0434	75.9824	3.55975	3.13254	181.815	188.599	5.72734	7.10991	2.28532e-36	5.85442e-34
RHOH	0.987286	1.04169	19.7589	20.5607	3.0255	2.96311	157.709	160.12	5.72577	6.69782	2.7582e-36	6.89348e-34
EXOSC9	0.718493	0.644475	14.374	13.419	0.472502	0.631657	30.6935	32.2292	6.09134	4.25981	4.75068e-36	1.15905e-33
IL27	0.060141	0.0257835	3.57341	4.63884	0.426131	0.434427	30.561	34.4759	6.33715	3.2759	8.24237e-36	1.91137e-33
TTC21A	0.611491	0.546575	26.4322	28.4413	1.40031	1.24949	78.1032	71.6902	5.67789	6.79297	8.31793e-36	1.91137e-33
TMEM62	0.57962	0.440507	15.7522	14.5224	0.440514	0.453646	32.6775	26.784	5.92568	4.98726	8.39382e-36	1.91137e-33
SLC38A5	0.0693166	0.0627558	1.2147	1.11654	0.0473597	0.0848933	8.89033	8.21639	7.434	2.29837	1.47729e-35	3.29081e-33
SCAMP1-AS1	0.0697603	0.0808133	3.03502	3.59886	0.251331	0.120102	17.2802	20.4725	6.34682	3.12194	2.04821e-35	4.46553e-33
PI4K2B	0.844263	0.748254	26.6363	16.4776	0.758507	0.803504	63.2301	39.3461	5.69675	6.06618	2.70544e-35	5.77556e-33
EXOC3L1	0.424627	0.468623	18.1846	24.548	2.33449	1.56031	81.4355	112.64	5.5924	6.23676	4.98709e-35	1.04291e-32
C17orf67	0.17393	0.0805861	3.35315	3.80792	0.138631	0.109136	11.1564	12.4968	6.49258	2.97868	8.47054e-35	1.73595e-32
CBR1	0.30316	0.442024	3.3224	4.35397	0.615216	0.574795	29.3343	34.5926	5.81286	4.16571	8.65394e-35	1.73876e-32
LCMT1	1.62339	1.93984	18.6008	20.6499	1.68414	1.52647	70.4147	84.2008	5.64356	5.10292	1.63531e-34	3.22251e-32
RMI2	0.084936	0.196463	2.04737	2.02858	0.141397	0.116779	14.1197	13.7948	6.60607	2.56167	3.29739e-34	6.33174e-32
STBD1	0.410515	0.571485	2.14938	2.42322	0.513173	0.527448	28.5173	26.5668	5.69375	4.5081	3.33672e-34	6.33174e-32
DZIP1L	0.100042	0.109608	1.03935	1.29691	0.0691956	0.0723283	7.68906	6.2533	6.49596	2.86298	4.01585e-34	7.4819e-32
IFIT2	119.41	105.135	3930.39	3362.73	179.315	195.46	7887.05	7614.21	5.40812	13.3191	5.09509e-34	9.3231e-32
CDCA4	0.401437	0.366779	0.620527	0.675386	0.301636	0.232581	18.2662	17.5407	5.86116	3.55806	6.37836e-34	1.14665e-31
EZH2	0.383834	0.366527	5.14623	4.71133	0.312358	0.42432	19.7952	17.3206	5.79263	4.04442	1.47364e-33	2.60351e-31
GBP1P1	1.23891	0.878527	24.3841	24.1505	4.52959	4.71469	187.214	193.423	5.41616	6.08652	1.99083e-33	3.45762e-31
MAP2K6	0.834161	0.797092	20.6101	19.3986	1.71793	1.59282	78.6569	76.0202	5.4675	5.5436	2.14477e-33	3.66291e-31
FAM47E-STBD1	0.366258	0.510955	1.94865	2.25013	0.488868	0.481353	25.7638	23.5644	5.59073	4.40488	2.76227e-33	4.64016e-31
NDUFA9	0.480505	0.513333	3.58788	3.92388	0.265035	0.313037	15.603	17.4896	6.04314	3.08566	4.50179e-33	7.44029e-31
TNFSF10	54.7217	53.78	1544.55	1497.64	101.471	107.629	4034.53	3970.2	5.29008	11.4379	5.71398e-33	9.29383e-31
SRGAP2B	0.617384	0.423426	7.25515	5.65091	0.787371	0.992707	34.9019	32.0072	5.34512	5.93635	1.15125e-32	1.84326e-30
DBF4B	0.263108	0.46013	5.3749	5.48851	0.282869	0.285932	14.3146	13.4644	5.57242	4.08491	4.93797e-32	7.78451e-30
CHST12	0.688403	0.583173	3.3522	4.06111	0.61488	0.463342	25.6642	26.9076	5.45123	4.05527	7.76077e-32	1.20492e-29
ATR	0.203606	0.219292	4.0066	2.96582	0.138842	0.196745	8.29992	6.16045	5.47114	4.51697	9.70294e-32	1.48397e-29
ZC3H7B	0.375177	0.384026	2.51612	3.11507	0.152812	0.203367	9.03145	7.1288	5.54335	4.08592	1.05891e-31	1.59569e-29
CD274	1.09131	0.887745	62.0874	44.5512	7.33443	8.84148	372.641	260.07	5.14805	8.44718	1.09478e-31	1.60989e-29
MB21D1	1.04131	1.12007	29.8105	24.5856	1.09621	0.817393	61.2214	44.5374	5.34421	5.20946	1.09976e-31	1.60989e-29
DNAJC15	0.0933954	0.107118	0.616762	0.63359	0.445887	0.524579	14.8908	19.2206	5.42948	3.66448	1.96042e-31	2.82935e-29
RASGEF1B	0.750861	0.74367	3.50434	2.49697	0.119069	0.243391	9.82686	7.15074	5.90697	3.20233	3.5123e-31	4.99869e-29
IFI35	4.41507	5.87292	289.49	371.876	32.5587	28.2509	976.805	1107.63	5.08827	8.78184	3.5877e-31	5.03605e-29
SLC27A3	2.807	2.95064	52.6818	65.126	4.19629	3.99704	138.71	146.3	5.12363	6.97403	3.82555e-31	5.29736e-29
RSAD2	2.18682	1.9608	410.627	328.812	47.9792	53.7229	1849.98	1602.65	5.06191	10.8817	5.88131e-31	8.02652e-29
IL1RN	42.7081	45.9682	910.191	892.678	47.3089	45.6839	1685.53	1580.19	5.06184	10.3008	5.95311e-31	8.02652e-29
HERC6	0.525247	0.335658	26.3796	21.7959	1.28554	1.61631	50.0707	45.2091	5.13608	6.16137	7.45761e-31	9.92444e-29
SLC1A3	0.0114325	0.012351	4.47665	3.22833	0.000559307	0.0125819	2.44341	1.94888	11.5866	2.66416	1.70535e-30	2.24035e-28
RNASEH2B	0.725842	0.693744	2.88976	2.71815	0.907354	0.852491	34.0065	34.9076	5.26544	4.01918	1.95421e-30	2.53478e-28
PARP10	6.61668	7.92217	206.071	255.232	26.2238	22.7355	699.342	832.759	4.98895	9.82102	2.59245e-30	3.3206e-28
LGALS8	3.37262	3.06428	79.8385	65.6296	3.43925	3.58805	118.16	107.786	4.96991	8.23884	4.11482e-30	5.20551e-28
CCL2	0.0233548	0.612004	3.65898	4.56926	0.027807	0.0254937	9.18174	10.4814	8.53683	1.4214	4.47675e-30	5.5943e-28
CARD17	0.491498	0.532594	7.13936	6.9739	2.02307	2.40773	67.146	81.4369	5.33061	3.29261	6.70007e-30	8.27176e-28
PIGY	1.99682	2.25903	72.1715	82.5133	2.8846	2.87323	89.6954	95.0986	5.04287	5.88876	7.59699e-30	9.1584e-28
PYURF	1.99682	2.25903	72.1715	82.5133	2.8846	2.87323	89.6954	95.0986	5.04287	5.88876	7.59699e-30	9.1584e-28
THBD	24.5529	24.1533	8.18135	7.16336	18.3578	19.4061	0.666898	0.528902	-5.11705	5.69964	1.52602e-29	1.81827e-27
LOC101927027	0.175236	0.100724	4.41177	3.16672	0.0718566	0.1223	9.59634	5.56415	6.27227	2.76578	1.62503e-29	1.91398e-27
LAP3	5.84509	6.42265	279.698	279.915	9.03648	9.88475	313.678	271.619	4.90966	8.27024	1.99577e-29	2.32394e-27
NEXN	0.0185268	0.0333337	1.06577	0.91675	0.0605392	0.0598613	3.60931	4.01326	6.04861	2.05244	2.12155e-29	2.44264e-27
OASL	9.33031	9.50522	439.079	539.259	49.7923	46.5047	1329.93	1469.96	4.88371	9.98686	2.14673e-29	2.44417e-27
SAMHD1	3.214	2.40225	158.911	130.311	6.6156	7.89794	257.776	195.805	4.88738	8.24856	2.17455e-29	2.44864e-27
DTX4	20.1946	19.2659	0.729825	0.786369	8.41672	9.0641	0.328791	0.24404	-5.10776	5.42026	1.08612e-28	1.20972e-26
IRF7	18.6372	22.585	735.157	972.812	115.098	103.325	2684.02	3203.53	4.79873	10.9758	1.16208e-28	1.28041e-26
TREX1	4.92052	6.64478	118.692	155.424	19.4034	17.5143	421.388	534.066	4.78263	8.40791	1.68187e-28	1.83342e-26
KARS	6.39666	6.3689	59.2987	64.7766	8.99801	8.33013	233.353	246.276	4.7745	7.44084	2.10851e-28	2.2743e-26
STAMBPL1	0.426954	0.30638	3.95898	3.59053	0.476632	0.432069	18.618	16.5853	5.12045	3.53923	2.29669e-28	2.45148e-26
LPAR1	0.401479	0.431451	0.990203	0.697028	0.111327	0.153714	7.17377	5.2862	5.56812	2.59526	2.80224e-28	2.96027e-26
DNAAF1	0.0257747	0.0716059	0.946556	1.3257	0.220476	0.165602	6.9169	9.05067	5.35852	2.51262	3.16534e-28	3.30972e-26
IL4I1	0.26491	0.368988	1.87705	2.3619	0.330658	0.403991	11.6373	12.0202	5.18343	3.13815	3.78984e-28	3.92267e-26
JUP	0.30225	0.284507	3.73063	4.29169	0.226691	0.353187	10.0445	8.15605	5.16852	3.58723	5.09464e-28	5.22048e-26
DUSP5	1.27435	1.67368	28.7174	25.1277	3.15198	3.85487	104.647	85.7545	4.76583	6.32793	6.17191e-28	6.26174e-26
IFIT3	58.9197	55.3598	2479.52	2500.77	281.441	290.734	6741.32	7354.96	4.70781	12.696	7.06672e-28	7.09928e-26
MX1	12.583	12.0388	1479.33	1490.81	98.0956	101.279	2753.63	2555.5	4.70327	11.8307	7.76654e-28	7.72658e-26
TMEM126B	2.1878	2.65352	41.6478	41.8807	3.70507	2.9437	99.223	102.172	4.78526	5.48674	9.03473e-28	8.90182e-26
DDX58	10.0329	8.0906	289.306	209.043	15.2996	17.4709	474.17	390.031	4.67202	9.71476	1.48493e-27	1.44915e-25
STAP1	0.241603	0.221204	2.86189	2.38058	0.270021	0.31122	12.9849	11.4766	5.40841	2.53924	1.88865e-27	1.82575e-25
PALM2-AKAP2	0.388306	0.188349	0.812099	0.660482	0.103324	0.0936704	3.56642	3.54214	5.09881	3.13743	2.20842e-27	2.11492e-25
SIGLEC1	0.0048452	0.00949353	1.48808	1.5869	0.0799224	0.0848991	4.03575	3.03759	5.24737	3.11801	2.75405e-27	2.61303e-25
GBP1	14.7329	13.4181	404.419	338.513	65.9357	69.5424	1810.01	1636.52	4.63342	10.6966	3.12278e-27	2.9357e-25
ASCL2	1.20284	1.59022	6.83388	9.03711	4.06015	3.00191	84.2754	104.399	4.68437	5.63104	3.44197e-27	3.20635e-25
ERP29	4.4474	4.67821	39.6717	53.1721	7.31727	6.08674	140.841	185.842	4.66659	6.34601	3.56442e-27	3.29051e-25
GALM	3.38525	3.56552	43.5454	50.8197	10.0487	9.38305	220.672	248.936	4.63067	7.51757	3.60853e-27	3.30149e-25
CISH	1.7603	3.51327	40.878	51.3326	3.82227	6.79467	91.9285	97.2999	4.66989	6.39751	3.8698e-27	3.50919e-25
AKAP2	0.416921	0.202229	0.871945	0.709155	0.113572	0.100573	3.82924	3.80317	5.06498	3.13781	3.92037e-27	3.52386e-25
FGD2	0.641052	0.747621	4.10291	3.89116	0.115824	0.220293	5.90114	4.94658	5.41519	2.97124	5.5492e-27	4.94458e-25
SIGLEC12	0.302237	0.251463	2.7144	3.17598	0.393016	0.260068	13.8822	12.3091	4.96851	3.23286	1.0236e-26	9.0421e-25
PHACTR2	0.594875	0.466025	3.03489	1.98482	0.568761	0.662941	14.3837	14.2583	4.64776	5.43628	1.04734e-26	9.17276e-25
ETV7	1.08147	1.29493	62.316	80.5272	13.6779	12.6689	282.785	325.382	4.5722	7.43633	1.15282e-26	1.00109e-24
ZNF366	0.101483	0.0924013	0.802284	0.683576	0.0738007	0.0669193	3.00486	2.74643	5.21684	2.57257	1.3052e-26	1.1239e-24
GIMAP6	0.553066	0.62278	4.75975	4.95533	0.594508	0.705451	21.9769	15.7223	4.72479	4.60893	1.3417e-26	1.1457e-24
LOC153684	0.261844	0.191408	3.74174	4.3661	0.588486	0.673927	18.4887	16.6494	4.82199	3.66758	2.08439e-26	1.76519e-24
BST2	2.7017	3.19915	148.405	199.718	27.2906	24.6513	480.561	634.585	4.53932	7.59812	2.17772e-26	1.82911e-24
ZNF684	0.19571	0.176975	3.02472	2.10493	0.106632	0.168466	6.47366	5.3047	5.6346	2.20474	2.35504e-26	1.96195e-24
RAPGEF3	0.114597	0.0992079	0.130204	0.177723	1.13005	1.16123	24.0483	27.1001	4.58378	5.39062	2.57541e-26	2.12825e-24
TMEM229B	0.0897399	0.100294	0.689405	0.643234	0.113894	0.160787	5.15325	4.08624	5.16407	2.48969	3.62817e-26	2.96614e-24
NASP	1.10749	1.23335	15.2693	17.558	2.0178	2.02173	41.0137	47.922	4.56977	5.72038	3.64726e-26	2.96614e-24
CARD16	39.7215	43.2064	321.593	424.338	81.9593	73.4189	1336.25	1847.9	4.49483	8.62557	4.96189e-26	4.00351e-24
GIMAP1-GIMAP5	0.435334	0.653171	2.00621	3.23357	0.286347	0.348263	7.98096	9.1008	4.98949	2.76743	7.39718e-26	5.92179e-24
NAB2	7.04762	7.66858	1.20092	1.56792	5.19739	4.91999	0.0731207	0.119638	-5.43969	3.24422	7.94747e-26	6.313e-24
TNFRSF12A	16.273	20.264	2.94765	4.47508	39.5079	32.4212	1.22255	1.49037	-4.72812	3.94032	1.29726e-25	1.02254e-23
SNAPIN	1.25212	1.79005	15.8487	21.9411	1.87772	1.82904	36.7397	46.6457	4.63447	4.07319	1.45651e-25	1.13779e-23
NOD1	0.514843	0.391505	4.61157	4.37072	0.906911	0.903741	22.8507	21.0295	4.5352	4.96538	1.46568e-25	1.13779e-23
TRIM14	1.14116	0.805632	44.2194	36.2075	2.57988	2.70783	73.2081	57.1896	4.47034	6.97376	1.52683e-25	1.17634e-23
BRCA2	0.0732116	0.0714614	2.16094	1.4568	0.0860379	0.0618491	3.48302	2.39756	4.80001	3.80149	2.03499e-25	1.55616e-23
RASGRP3	0.139581	0.0904793	1.81344	1.19238	0.123907	0.203221	5.06959	3.79807	4.93721	2.89444	3.18181e-25	2.41494e-23
NRN1	0.0158365	0.0130924	0.0242348	0.0210026	0.386786	0.594489	11.2035	11.0608	4.83723	2.58381	3.20515e-25	2.41494e-23
TCF4	0.383021	0.302732	1.32274	1.00778	0.0998694	0.152713	2.93586	2.82746	4.8228	3.23556	3.62013e-25	2.7077e-23
FAM72C	0.0268666	0.0272985	0.95617	0.70017	0.0246688	0.0510537	2.73128	2.74613	6.79089	1.09014	3.71604e-25	2.73944e-23
FAM72D	0.0325537	0.0317966	0.953641	0.69232	0.0240915	0.035892	2.67906	2.68186	6.79089	1.09776	3.71604e-25	2.73944e-23
LSM2	0.741162	0.603323	6.2093	8.98482	0.798903	0.838224	17.1755	23.6184	4.88513	2.69974	3.81896e-25	2.7952e-23
VGLL4	0.588335	0.70341	3.5477	3.74046	0.651184	0.740846	16.5987	15.1572	4.54062	4.34061	4.29744e-25	3.12311e-23
RTP4	0.241496	0.318443	17.9713	21.0329	11.9306	10.2011	222.917	254.585	4.41538	6.09053	4.47065e-25	3.22611e-23
MDK	0.348982	0.493279	4.94932	5.87231	0.613498	0.613032	14.4468	17.126	4.80238	2.7104	9.10581e-25	6.52498e-23
CBWD2	2.95453	2.73975	28.7397	26.9434	3.23097	3.25759	67.5063	68.535	4.40673	5.54153	1.07143e-24	7.62429e-23
OAS1	1.7827	1.63503	106.557	121.91	33.8423	30.2891	655.328	683.441	4.33591	8.40869	1.11877e-24	7.90624e-23
CMC2	1.80442	2.25969	14.4792	16.119	3.41325	3.39127	64.178	76.4502	4.48513	4.05517	1.23181e-24	8.64547e-23
OAS2	0.763164	0.539947	50.9982	39.9873	5.82019	6.40663	184.365	117.255	4.33241	7.53256	1.30299e-24	9.08281e-23
ATF5	0.957674	1.31406	6.97383	8.35939	2.21377	1.90356	39.9187	46.873	4.4041	4.94792	1.34542e-24	9.3152e-23
HES4	1.06516	2.48924	28.5767	36.2273	11.9222	9.37226	189.457	240.374	4.33352	6.07486	2.19507e-24	1.50959e-22
CNDP2	1.85057	1.93174	11.9138	12.7995	2.97376	3.19254	71.2411	59.3541	4.31896	6.71149	2.50078e-24	1.70837e-22
MOV10	2.40971	2.72801	58.8828	66.0557	11.7579	11.1799	263.896	229.641	4.28767	8.50593	2.86778e-24	1.9461e-22
NT5C3A	15.4869	14.3021	273.554	227.42	36.0211	37.1689	830.304	695.85	4.27186	8.9903	3.84816e-24	2.59422e-22
PKD2L1	0.0204319	0.00475924	0.271228	0.346375	0.0187605	0.0497024	2.05891	1.91109	6.66288	0.850894	4.09451e-24	2.74225e-22
SP140L	5.57505	5.58978	51.9011	52.5551	9.60077	8.97671	176.252	184.623	4.26527	7.36733	4.69962e-24	3.12708e-22
ADPRHL2	3.79992	4.63209	27.4139	33.5189	4.23233	4.24101	71.9923	83.9344	4.30968	5.6271	5.2456e-24	3.46785e-22
LHFPL2	0.321011	0.239253	5.15	3.77769	0.797255	0.934582	23.2153	16.1732	4.34232	4.99636	6.87322e-24	4.51474e-22
FBXO6	5.5045	6.08047	65.0955	80.5131	15.5364	14.9437	243.668	294.168	4.2429	7.13427	7.30661e-24	4.76884e-22
IRF5	4.45569	5.14722	74.233	86.2108	6.26446	5.97324	132.717	119.39	4.25232	7.31778	8.45018e-24	5.48032e-22
ENTPD6	0.307278	0.276788	1.54845	1.84956	0.14772	0.140006	4.43879	4.58352	4.95446	2.20148	1.13761e-23	7.3315e-22
TSC22D1	0.171125	0.149176	0.337651	0.372871	0.0747774	0.121748	2.97688	2.15114	4.84542	2.30124	1.58322e-23	1.00868e-21
HK1	6.1788	6.34708	72.7942	80.6114	7.27311	8.24036	157.264	133.844	4.20182	7.87099	1.58483e-23	1.00868e-21
IFIH1	15.7231	14.6599	289.433	217.216	26.6663	30.8147	595.165	488.082	4.19403	9.56033	1.71163e-23	1.08266e-21
ABTB2	0.808103	0.920621	3.63787	3.86211	0.66991	0.869622	18.8819	13.2669	4.30759	4.71753	1.87098e-23	1.17619e-21
LMO2	16.2353	19.3704	123.221	151.105	48.4279	42.534	835.133	879.808	4.18327	9.24426	2.09687e-23	1.31016e-21
KLF5	1.90364	1.61396	10.2028	6.7592	1.88287	1.96423	46.044	35.1618	4.22294	5.55603	3.17936e-23	1.97448e-21
TLR5	0.259113	0.259828	13.3406	8.87018	0.130189	0.11804	4.52596	3.4603	4.73144	4.04718	4.61608e-23	2.84946e-21
TNFRSF8	4.65858	5.29996	1.36001	1.70176	3.96768	3.1516	0.12211	0.135032	-4.87606	3.2406	4.99412e-23	3.06436e-21
FAM72A	0.0579156	0.0407549	1.0188	0.777973	0.0210023	0.0370531	2.87924	2.57508	6.92664	0.796154	5.1697e-23	3.15321e-21
CSTF3	0.659341	0.601751	2.03654	1.82406	0.36008	0.438888	8.94268	8.00296	4.47372	3.01395	6.0075e-23	3.64254e-21
FAP	0.0279616	0.0581978	1.03221	1.26179	0.159685	0.270764	5.84704	4.52625	4.82405	2.20064	6.90866e-23	4.1643e-21
TNFSF13B	33.4989	29.8562	746.486	673.583	79.7859	80.6051	1331.62	1379.36	4.11172	10.5058	8.17855e-23	4.90091e-21
GMPR	0.230989	0.188163	1.56901	1.70022	0.0502247	0.100816	3.16029	3.43497	6.08997	0.991405	9.34707e-23	5.56857e-21
APOL6	3.78947	3.48476	125.083	97.8363	16.1501	16.5732	284.911	274.173	4.08547	10.0249	1.35755e-22	8.04092e-21
SLC22A16	0.0620867	0.0259464	0.288295	0.186385	0.177674	0.152715	4.66776	5.24213	4.88162	1.42473	1.40887e-22	8.29696e-21
MIR3614	35.8783	33.3321	209.61	337.507	48.2701	39.0853	665.169	872.153	4.17528	4.59104	1.57731e-22	9.23585e-21
RHPN1	0.28134	0.318289	1.56673	1.93588	0.472164	0.468459	7.95557	9.22845	4.28849	3.3687	1.906e-22	1.1097e-20
SLFN5	0.179382	0.116896	1.22695	1.06854	0.155256	0.079618	3.79452	3.56112	4.51902	2.56622	1.96497e-22	1.13757e-20
SAT2	1.58756	2.04485	12.0363	15.6337	7.14463	6.04146	103.284	124.057	4.11794	5.03242	2.33069e-22	1.34172e-20
CCL8	0.00186585	0.00186585	0.590796	0.573754	0.00186585	0.00186585	2.71085	3.19221	10.5604	0.153813	2.99468e-22	1.71433e-20
PEX3	0.142601	0.0496225	0.780421	0.678713	0.0540579	0.127443	2.92861	2.38667	5.46143	1.31301	3.64358e-22	2.07421e-20
APOL1	11.0818	13.4874	208.633	263.462	54.1826	51.6141	776.942	886.409	4.03207	9.73894	3.75989e-22	2.1286e-20
LPAR6	1.00735	0.659833	4.65848	3.80955	3.1078	3.31191	62.8771	52.0066	4.06468	5.62475	4.541e-22	2.55668e-20
PARP12	5.31988	5.39573	162.784	159.152	21.9474	21.3126	394.974	356.024	4.01985	9.06266	4.83427e-22	2.70693e-20
SLFN12	1.65567	1.40026	15.4319	13.0872	1.30554	1.36822	29.8336	22.9692	4.13686	4.78347	4.86309e-22	2.70826e-20
RASSF4	0.31593	0.508415	5.24531	5.72309	0.133966	0.134894	3.80336	3.82312	4.83353	2.62222	5.1029e-22	2.82645e-20
PML	3.85786	4.05848	137.666	153.979	11.8584	12.7185	246.077	190.3	4.00429	9.055	6.56241e-22	3.61532e-20
DENND4A	1.63362	1.22659	10.0034	5.97627	0.88234	0.977317	17.7801	14.7008	4.05835	5.60853	7.76059e-22	4.25255e-20
HELZ2	18.7209	21.4015	336.11	401.857	29.7465	32.4157	585.551	472.322	3.98898	11.2126	8.45002e-22	4.60571e-20
SCARB2	1.23381	1.11966	11.9314	10.0992	2.52253	2.32123	43.731	40.8937	4.0189	6.08425	9.02716e-22	4.89425e-20
MT1G	0.490891	0.734223	2.4098	2.62817	1.41718	1.53249	25.9182	33.4602	4.56061	1.79861	9.08182e-22	4.89797e-20
ZFYVE26	1.3843	1.04466	6.0972	5.51012	0.810247	0.867337	18.3332	13.2825	4.03496	5.83917	9.19202e-22	4.91478e-20
FAM72B	0.0200815	0.026873	0.741207	0.542999	0.0553534	0.050258	2.31149	2.52595	5.50868	0.902438	9.20892e-22	4.91478e-20
SSTR3	0.164287	0.234344	1.34399	1.70671	0.417826	0.523549	7.2765	7.6867	4.20115	3.33014	9.87409e-22	5.23908e-20
SNAI3	26.7085	31.5408	6.44762	8.76497	36.7405	31.8731	1.6024	2.12696	-4.11039	4.96687	9.91883e-22	5.23908e-20
ZBP1	20.8301	22.0778	234.631	285.278	47.2794	47.2629	674.44	743.827	3.97568	9.21973	1.1081e-21	5.82292e-20
GADD45B	32.9881	33.474	277.973	309.623	58.2975	53.7579	768.166	909.547	3.96364	8.71439	1.40682e-21	7.35495e-20
NCOA7	1.15728	1.0182	16.5235	10.4182	1.59744	1.85549	32.1977	25.4764	3.99529	6.20919	1.58896e-21	8.26499e-20
DRAP1	22.3646	26.7897	226.369	326.287	80.9528	71.2215	937.695	1256.68	3.95639	8.53293	1.61281e-21	8.34672e-20
NFE2L3	0.106547	0.0702107	0.864745	0.53464	0.139795	0.171797	4.39079	3.28546	4.55388	2.15068	1.82223e-21	9.38309e-20
FCGR1A	2.27924	2.71273	51.0532	54.1693	21.3811	19.1855	304.998	329.293	3.94496	7.7384	2.0633e-21	1.05713e-19
FCGR1C	1.97163	2.12882	41.2169	42.1207	17.8059	15.499	256.399	274.844	3.94817	6.76561	2.07674e-21	1.05873e-19
HNRNPLL	4.09915	3.74735	30.6882	24.194	4.58179	4.81323	88.7703	71.3312	3.96052	6.46121	2.49787e-21	1.2625e-19
ZC3HAV1	8.00506	6.74073	143.262	117.441	14.8142	16.6489	274.227	226.22	3.93267	9.49926	2.50109e-21	1.2625e-19
FCGR1B	2.01208	2.17072	40.1878	41.8215	16.3833	14.871	230.347	250.19	3.93271	7.35297	2.65582e-21	1.33403e-19
GIMAP5	0.46021	0.682359	1.44353	2.48222	0.256665	0.286148	5.27926	5.99244	4.5443	1.9906	3.3256e-21	1.66231e-19
CBWD5	1.88475	1.546	16.7665	15.0268	2.1448	1.96138	32.0316	33.7998	3.97803	5.2349	3.60422e-21	1.79284e-19
C19orf66	6.96686	8.26349	117.714	144.408	27.7684	23.5694	387.104	417.85	3.91147	8.24103	3.82429e-21	1.89312e-19
GBP3	2.99865	2.68983	47.5577	38.7335	9.51169	9.89572	167.094	142.785	3.90799	7.32272	4.32977e-21	2.13304e-19
CMPK2	0.823153	0.563618	120.525	83.2915	11.3741	12.9474	256.54	168.392	3.888	7.94588	6.19831e-21	3.03895e-19
CLDN9	8.59016	9.30172	2.14418	2.5019	13.3945	12.4899	0.478938	0.762355	-4.13477	3.67565	8.92269e-21	4.35385e-19
CBWD3	2.88726	2.56266	22.894	22.6308	3.60793	2.98866	49.2317	54.4575	3.91582	5.11861	1.09409e-20	5.31334e-19
LOC731424	4.37431	4.62047	40.8333	47.2363	16.4929	16.4805	200.257	237.834	3.85003	7.91141	1.21779e-20	5.88619e-19
PSMD3	4.20278	5.532	22.0326	29.0643	4.31796	3.58482	58.416	63.1996	3.87145	5.70179	1.68807e-20	8.12098e-19
SRGAP2C	1.481	1.12983	11.1171	7.93507	1.55194	1.49486	44.1795	23.6132	3.92735	4.83094	1.81833e-20	8.67572e-19
LRRC75A	7.7373	8.22076	0.666322	0.870266	10.7807	11.9342	0.576618	0.642258	-4.06892	3.87307	1.82032e-20	8.67572e-19
EVL	4.35816	3.96541	13.8474	14.9815	4.63618	5.09999	70.8004	67.708	3.86827	5.41604	1.98107e-20	9.39816e-19
IDH2	11.7165	13.2857	35.2154	43.1298	24.7979	22.0863	318.973	349.474	3.81689	7.5332	2.29862e-20	1.08544e-18
MED22	10.5204	11.4896	2.01441	2.48389	10.3013	9.7799	0.729718	0.645938	-3.99512	4.55626	2.36254e-20	1.1105e-18
SRGAP2D	1.51896	1.08599	10.8524	7.6025	1.52428	1.48325	44.0598	23.1338	3.92368	4.71386	2.54096e-20	1.18891e-18
HTATSF1P2	21.5579	18.7434	5.53089	5.30576	10.6544	11.0896	0.75228	0.687362	-3.9541	5.42419	2.59202e-20	1.20729e-18
TRAFD1	23.6198	24.656	224.251	246.419	36.8102	37.9656	552.411	509.787	3.79171	9.36201	3.50858e-20	1.62681e-18
CH25H	0.00169253	0.00169253	1.15631	1.20227	0.00169253	0.00169253	2.98708	2.35644	10.2631	0.418233	4.34704e-20	2.00649e-18
GFOD1	0.516984	0.66217	1.60874	1.9703	0.647315	0.940346	8.94284	10.0494	3.9563	3.39055	4.67494e-20	2.14816e-18
IFIT5	7.53496	6.07691	151.373	108.665	11.3093	12.7434	199.131	154.759	3.77444	8.36009	5.06791e-20	2.31834e-18
IGFLR1	8.00111	9.09824	57.2057	71.6245	11.1335	8.59522	133.705	155.082	3.80002	6.08642	5.28055e-20	2.40488e-18
LOC101927181	0.257045	0.197386	0.770873	0.742223	0.170626	0.122402	4.06287	4.0036	4.55117	1.4204	5.62533e-20	2.55057e-18
FFAR3	0.408164	0.369004	10.7388	14.1838	1.72183	1.47064	21.66	25.66	3.89736	3.9945	5.66829e-20	2.55872e-18
RBM11	0.11644	0.169923	0.942864	0.873409	0.151177	0.145616	4.18406	3.86713	4.67551	1.36586	6.57813e-20	2.95641e-18
P2RY14	1.0393	1.09795	25.4063	16.0095	6.82446	7.44552	130.303	93.5858	3.77748	6.5593	6.81331e-20	3.04873e-18
CEACAM1	13.1688	11.8918	119.891	100.185	17.4184	17.9136	290.344	235.465	3.75682	8.47034	6.89762e-20	3.07304e-18
CBWD6	2.50712	2.52571	24.3011	21.3527	3.4876	2.9859	44.9994	49.2527	3.81983	5.02439	7.02574e-20	3.11657e-18
GIMAP4	49.7111	47.865	409.359	397.537	94.3196	96.494	1225.52	1271.5	3.75283	9.78524	7.15248e-20	3.15911e-18
TSPAN17	0.298737	0.347647	5.92852	6.70912	0.464027	0.285022	8.31651	7.71513	4.05506	3.28366	7.20727e-20	3.16965e-18
FAM46A	7.32567	6.01103	61.0864	51.4949	10.1205	10.527	154.07	136.481	3.75335	8.26043	7.39025e-20	3.23624e-18
GIMAP2	3.87962	3.30073	65.2323	65.0288	11.7533	10.4666	194.949	160.713	3.77332	6.53752	7.65233e-20	3.3346e-18
SRGAP2	0.984528	0.879038	8.24075	6.87924	1.26282	1.27599	28.6229	17.6344	3.80362	5.61847	7.67996e-20	3.3346e-18
STOM	8.04349	8.52959	73.2688	55.0206	10.5502	11.7761	187.969	141.884	3.74935	7.69194	8.26533e-20	3.57362e-18
EPSTI1	0.48705	0.369398	21.8265	22.314	23.6536	23.379	331.376	315.748	3.73864	8.20827	9.56283e-20	4.11724e-18
NKIRAS1	0.508748	0.296937	1.84619	1.96684	0.370884	0.67968	5.85075	6.70577	4.17579	2.18787	9.93798e-20	4.26086e-18
CASP10	2.55432	2.52099	16.1522	13.7782	3.03827	2.8611	52.9813	41.0135	3.75476	6.63805	1.03083e-19	4.40121e-18
GCNT2	0.097548	0.11364	0.219063	0.345863	0.355713	0.297385	5.81682	5.48781	3.94719	2.89547	1.11113e-19	4.72436e-18
PNPT1	2.76901	2.97179	69.5587	59.7732	8.07105	7.37993	118.227	106.828	3.72638	7.75874	1.25863e-19	5.3294e-18
EIF2AK2	4.68597	4.20189	186.639	156.426	19.675	21.3504	296.401	259.573	3.7217	9.00958	1.30191e-19	5.48998e-18
GBP4	8.34552	6.85396	96.4499	72.3256	33.7377	35.4793	525.644	444.566	3.71996	9.8761	1.31242e-19	5.51162e-18
SAMD4A	0.0644856	0.0489154	0.615482	0.451696	0.0947923	0.115289	2.44543	1.75485	4.20978	2.25755	1.61891e-19	6.77102e-18
PVRL2	1.62014	2.04962	14.2109	17.1286	1.62783	1.56313	19.7356	22.559	3.79259	4.84554	1.63387e-19	6.80581e-18
LAG3	0.175677	0.235673	2.4808	3.02589	1.37118	1.06661	15.8202	19.6976	3.84438	3.45039	1.6554e-19	6.85775e-18
VPS18	11.7734	13.2907	3.25022	3.46674	13.0669	12.6747	1.18612	0.916349	-3.83376	4.86209	1.65973e-19	6.85775e-18
CBWD1	3.81914	3.52509	25.8089	25.4395	4.17321	3.88319	54.4046	56.4372	3.75736	5.33674	1.72052e-19	7.08039e-18
APOL3	0.470736	0.355926	3.05974	2.87346	1.84815	1.50481	22.1625	25.084	3.76256	4.70345	1.82343e-19	7.47389e-18
APOBEC3G	7.74768	7.30056	46.3821	52.3323	13.474	13.3504	175.254	175.983	3.70717	6.8171	1.88355e-19	7.68953e-18
BAG1	5.34818	5.78509	37.5104	44.3312	9.92995	9.58208	102.799	128.98	3.69921	7.38055	2.0747e-19	8.43628e-18
SMIM15	3.52037	2.84645	1.38127	0.947828	3.77804	3.86931	0.397832	0.180795	-4.3844	2.62365	2.16327e-19	8.76168e-18
PDCD1LG2	0.0509686	0.0111323	0.776824	0.516224	1.90745	2.35771	35.1506	26.0819	3.77324	4.33686	2.27032e-19	9.15906e-18
DYNLT1	38.3551	44.8114	198.932	232.504	72.9491	66.0263	819.483	942.185	3.69104	7.86468	2.34344e-19	9.41695e-18
TBX19	0.466771	0.532267	2.96291	2.73665	0.954821	0.97201	14.5489	13.5531	3.82709	3.69632	2.71853e-19	1.08815e-17
SFT2D2	1.59178	0.749486	4.24726	4.65552	1.16597	1.64264	15.5647	18.8984	4.01824	2.37912	2.85987e-19	1.14027e-17
DDX60	0.425948	0.332349	22.0818	13.3724	2.88488	3.46486	57.1694	37.3284	3.69366	6.70116	3.19781e-19	1.27007e-17
C19orf12	0.289924	0.379199	3.91551	3.83966	0.507151	0.588379	8.33669	7.22414	3.83217	3.91374	3.24012e-19	1.28191e-17
LACTB	6.69679	6.36561	51.5017	52.2187	8.00492	8.28713	99.2742	102.231	3.67478	6.97658	3.4388e-19	1.35529e-17
ZNF649	0.188064	0.153098	0.707178	0.798211	0.177861	0.207868	2.87992	3.31666	4.22017	1.76979	4.64137e-19	1.82223e-17
APOBEC3F	1.05749	0.794683	6.02591	5.92319	1.64	2.03866	25.5156	21.3743	3.70405	5.2382	4.74773e-19	1.85687e-17
IFI6	11.0568	17.0697	781.092	1083.31	390.406	300.265	3693.04	4896.24	3.64862	10.2301	4.85548e-19	1.89179e-17
GBP7	0.0994914	0.07609	0.842844	0.708403	0.33157	0.498072	5.79418	5.55245	4.06522	2.09461	5.48797e-19	2.13012e-17
RGS14	100.137	109.216	23.3632	30.2898	132.91	117.016	9.70165	10.6254	-3.64484	7.3258	6.24575e-19	2.4151e-17
SLED1	2.58252	4.55965	23.5287	32.0016	5.28911	4.19212	49.6679	69.6557	3.71904	4.16701	8.00027e-19	3.08191e-17
CASP1	39.7095	38.7845	356.836	341.845	69.7259	69.345	858.988	857.896	3.62103	9.36763	8.17312e-19	3.1367e-17
GRAMD1B	0.299633	0.274778	1.1207	1.11338	0.686514	0.679125	10.7715	8.85891	3.68969	4.56027	8.49692e-19	3.2488e-17
MOB3C	17.5193	19.1588	95.5029	106.271	11.8669	11.276	150.509	144.634	3.60738	7.61768	1.13838e-18	4.33641e-17
SAMD9L	6.87596	4.87451	122.523	81.6957	12.0563	12.8253	187.43	146.372	3.60178	9.00553	1.18098e-18	4.48204e-17
AIM2	5.77616	6.53732	83.6608	84.7002	20.4292	21.9157	234.521	246.631	3.59364	7.02938	1.48013e-18	5.59665e-17
SLC25A28	9.90561	10.6184	60.9959	69.9835	18.524	17.5942	209.847	223.471	3.5926	6.91534	1.51777e-18	5.71788e-17
KCTD12	23.8596	16.6273	2.53996	1.68032	16.054	18.3597	1.97914	1.28314	-3.64513	6.00636	1.5399e-18	5.77999e-17
UNC93B1	28.7373	36.0904	280.885	341.411	60.3406	55.3051	648.453	721.142	3.57908	9.29982	1.75879e-18	6.57749e-17
APPL1	0.920676	0.722538	4.85563	3.56626	0.618079	0.698075	9.79528	7.92998	3.68134	4.46333	1.84393e-18	6.87082e-17
ARL5B	1.47454	0.949414	10.9314	6.23785	0.981968	1.16007	18.1923	12.665	3.68892	4.56101	1.88195e-18	6.98707e-17
MYCBP2	1.58244	1.32066	2.72338	2.59792	1.86436	1.7664	20.1776	22.3004	3.5803	6.67318	1.9068e-18	7.0538e-17
SLC18B1	0.231563	0.198661	1.18587	0.683184	0.15304	0.0974404	4.23628	3.07548	4.32768	1.58349	1.99291e-18	7.34582e-17
TRIM26	7.03779	7.24817	50.9656	58.0968	8.5352	8.87543	103.801	100.618	3.55931	7.28171	2.76328e-18	1.01489e-16
CXCL8	586.742	562.833	339.412	233.943	1187.71	1323.97	135.579	101.841	-3.5438	9.89656	3.35043e-18	1.22614e-16
CASP1P2	0.0699178	0.0234641	0.401357	0.345349	0.0514668	0.0695834	2.32149	1.82917	5.14756	0.494986	3.45099e-18	1.25844e-16
PPM1J	0.036632	0.0515649	0.874216	1.00233	0.0981844	0.0696106	2.22191	2.84829	4.85589	0.635596	3.58572e-18	1.30294e-16
ANXA3	11.4909	11.1319	160.86	169.482	19.9681	19.8941	249.362	232.681	3.54257	7.46724	3.72581e-18	1.34906e-16
OAS3	1.20462	1.12243	123.801	97.69	20.2813	23.7825	356.472	235.237	3.53588	9.47849	3.86094e-18	1.39307e-16
RHOF	51.3938	59.1075	11.3528	14.554	81.9755	78.3699	7.34498	6.96904	-3.55614	6.56579	4.29875e-18	1.54559e-16
TBC1D31	0.0653648	0.0918796	0.380187	0.344572	0.0480274	0.0626659	1.62197	1.36498	4.82632	0.809132	5.5294e-18	1.98111e-16
RNF213	8.78972	7.9951	176.874	169.809	39.6324	40.7459	513.184	450.001	3.50518	11.8547	6.57892e-18	2.34893e-16
GIMAP1	0.630267	0.629645	2.36664	2.62298	0.697857	0.757388	7.74468	8.64414	3.63059	3.73456	6.79735e-18	2.41849e-16
TARBP1	0.100624	0.0555687	0.296716	0.287115	0.083127	0.0884097	1.71886	1.53106	4.20208	1.42039	7.2588e-18	2.57374e-16
PLSCR2	0.048749	0.0245374	0.640464	0.563838	0.0706943	0.0851214	2.10299	2.43503	5.10236	0.265548	7.52814e-18	2.66003e-16
SPSB1	0.0734803	0.0953995	0.328348	0.380801	0.065822	0.038278	1.45524	1.59803	4.59949	0.662138	8.18888e-18	2.87368e-16
BISPR	1.521	1.23109	43.4553	45.4041	5.66696	4.83045	76.8936	65.3914	3.52842	5.91078	8.4302e-18	2.94827e-16
ORAI1	11.4626	14.9788	58.7846	71.1748	15.3842	13.6978	151.164	173.423	3.49476	6.58162	9.27041e-18	3.23108e-16
KIF1C	2.46866	2.60264	16.8006	19.4342	2.96758	2.9829	33.691	33.3239	3.48918	6.82144	1.02259e-17	3.55202e-16
C18orf61	0.335111	0.259132	1.13876	1.08495	0.109607	0.222612	2.47653	2.2925	4.38507	1.43274	1.06472e-17	3.68588e-16
SAMD9	7.95076	5.81949	93.2813	63.8483	10.631	11.2315	126.517	118.537	3.47899	8.55138	1.10512e-17	3.81285e-16
CNTRL	1.25318	0.934973	2.19895	1.78963	1.30803	1.31366	16.2056	14.9135	3.51111	5.21283	1.21849e-17	4.1899e-16
PLGRKT	0.502593	0.618831	6.29046	7.33634	1.90733	1.86289	20.1002	24.2255	3.66669	2.97116	1.35287e-17	4.63641e-16
SECTM1	48.8193	60.1831	593.327	784.789	180.817	159.983	1728.44	1993.08	3.4624	10.6284	1.42864e-17	4.87977e-16
RUFY4	0.050717	0.0549469	0.420252	0.513796	0.153373	0.319002	2.6972	2.51045	4.03207	1.60908	1.48525e-17	5.05628e-16
PHF11	17.2232	15.5743	194.386	185.879	23.965	23.3711	274.798	264.357	3.46348	7.68682	1.52516e-17	5.17493e-16
NUDT16	1.12587	1.10205	9.02232	10.1699	1.42406	1.57617	14.4487	16.1023	3.49914	5.41427	1.66106e-17	5.61745e-16
UBA7	6.22776	6.72039	39.8685	44.0556	13.136	12.0311	154.702	143.864	3.4531	7.44454	1.8224e-17	6.14281e-16
MTVR2	0.337906	0.199679	4.00948	5.68754	0.434339	0.558549	8.03317	8.0866	4.21744	1.47931	1.96027e-17	6.58588e-16
ASPHD2	0.557261	0.731669	2.68149	2.55917	1.62592	1.65016	19.8853	18.6472	3.51955	4.32373	1.97644e-17	6.61849e-16
LOC101927354	0.261249	0.132293	1.75056	1.64025	0.19691	0.0909043	4.74698	5.63404	4.83568	0.470135	2.02721e-17	6.7664e-16
MTO1	0.397973	0.29153	0.843308	0.698583	0.164323	0.203895	2.92434	2.71047	4.04309	1.65327	2.03834e-17	6.78145e-16
GPR155	3.74222	3.31399	23.8072	21.2767	6.53093	6.39461	70.0102	71.1416	3.44533	7.60515	2.07443e-17	6.87918e-16
MT1X	0.903618	1.00989	2.35698	2.53357	1.19248	0.626248	14.3448	19.748	4.0488	1.11567	2.28816e-17	7.56346e-16
WRB	5.8721	5.25309	0.997869	0.676675	6.33165	5.48344	0.161603	0.395153	-4.00142	2.32285	2.72036e-17	8.9632e-16
C5orf56	10.9111	13.0898	83.1328	111.158	47.6937	39.633	399.934	514.199	3.43044	6.93954	2.76794e-17	9.09073e-16
RBBP6	6.08032	5.72057	30.3374	30.4221	7.30764	7.70825	69.7387	78.694	3.42877	7.65594	2.78895e-17	9.13048e-16
SPATS2L	0.617396	0.538765	1.55305	1.49874	1.08487	1.30476	11.9072	12.116	3.48125	4.61342	2.80988e-17	9.16969e-16
HEXDC	0.9193	1.11305	5.86838	6.42624	2.36616	1.87376	24.3718	26.7551	3.49912	4.27548	2.95035e-17	9.59752e-16
CCNJ	0.212404	0.143158	0.781042	0.439855	0.0985989	0.170182	2.85456	1.7305	4.13244	1.73756	3.11419e-17	1.00984e-15
P2RY12	0.014138	0.00635048	0.165995	0.15178	0.0330397	0.00101273	2.50427	1.46375	5.46359	0.324567	3.31221e-17	1.07067e-15
SGK1	39.355	38.6266	7.42683	5.44983	19.506	22.1417	2.45743	1.72633	-3.49806	5.77477	3.418e-17	1.10139e-15
GYPC	1.74868	2.23727	8.13515	12.0266	4.60432	3.80103	37.1119	50.4754	3.45448	4.9566	3.48854e-17	1.1206e-15
LILRA5	26.4756	33.1068	178.462	211.489	33.6792	29.6171	316.842	358.918	3.41372	7.66403	3.67479e-17	1.17674e-15
FLJ32255	3.32598	3.42716	22.7926	27.4582	8.14124	7.20876	74.6963	86.9688	3.41716	6.33481	3.76166e-17	1.2008e-15
SERPING1	3.36065	3.52146	134.706	138.797	33.6819	32.9396	398.487	353.581	3.39199	8.07738	5.28295e-17	1.68119e-15
KPTN	0.588171	1.05973	18.1358	22.9085	4.30768	3.16116	37.3257	46.7809	3.44089	4.89895	5.39419e-17	1.71128e-15
FAM212B	48.708	52.2819	15.8332	18.2937	55.1772	58.2278	4.61003	5.24429	-3.39524	7.59386	5.53516e-17	1.75058e-15
FYTTD1	5.09122	4.25681	17.8793	11.3132	2.39717	2.85869	43.1936	25.8327	3.42975	5.7533	5.71013e-17	1.80036e-15
NUP205	0.181303	0.202473	0.572731	0.447007	0.0798403	0.128409	1.76482	1.26159	3.98115	1.8657	5.83367e-17	1.83367e-15
LOC648987	0.864798	0.863655	5.29327	5.76465	1.14164	1.3189	12.2723	12.9324	3.50168	3.80614	6.00244e-17	1.88095e-15
RNF115	0.993277	0.864847	5.35954	5.07068	0.946813	0.995314	12.7597	11.2937	3.57607	3.22391	6.69412e-17	2.0913e-15
ITPRIPL2	0.416475	0.370733	3.5906	3.2156	0.577511	0.542954	7.42286	6.37693	3.46485	4.43812	6.82356e-17	2.12526e-15
IFI16	45.9004	42.1265	759.963	659.138	81.1173	92.3479	921.432	836.755	3.36672	10.1987	7.9574e-17	2.47089e-15
MIR4477B	10.1046	15.5087	81.5315	86.0137	37.8185	33.2454	364.876	425.396	3.49151	3.4176	7.99069e-17	2.47373e-15
USP30-AS1	0.0641996	0.0652316	0.488012	0.712441	0.209782	0.29287	3.0928	4.63722	4.46421	0.237814	8.03759e-17	2.48076e-15
CCDC71L	1.44904	1.68718	8.99698	10.8222	2.80147	2.44076	30.162	29.5406	3.39841	5.60345	8.10032e-17	2.49261e-15
GCH1	5.50374	4.37158	31.9722	20.8792	20.6089	21.123	285.251	212.301	3.36476	7.78211	8.62467e-17	2.64602e-15
TTC7A	2.15047	2.14875	7.80569	8.38116	1.43542	1.41277	17.7656	15.2886	3.41286	5.20467	8.94083e-17	2.73483e-15
NUB1	20.6732	17.9422	138.038	142.483	40.756	42.156	465.072	417.652	3.35721	8.99317	9.53634e-17	2.9083e-15
TRIM25	27.915	26.9851	263.903	263.834	38.0095	42.2417	409.774	387.765	3.35075	10.0342	1.05671e-16	3.21309e-15
GPR68	0.122359	0.116867	1.35424	1.55765	0.232922	0.298817	3.89529	3.32655	3.83548	1.96661	1.06263e-16	3.22152e-15
GINS1	0.235066	0.187587	1.02598	0.870104	0.499681	0.498649	3.48081	5.93521	3.56997	2.39121	1.25821e-16	3.80322e-15
RAB3D	134.542	130.196	46.3445	44.4776	120.826	133.274	15.9024	11.9768	-3.33462	8.41184	1.52634e-16	4.60011e-15
THAP11	4.56901	4.57031	1.02113	1.09502	4.792	3.82024	0.387038	0.31644	-3.91992	2.29344	1.6402e-16	4.92878e-15
SPHK1	2.00101	2.59585	10.7765	14.2908	2.0105	1.58498	17.2869	21.4024	3.41205	4.29702	1.6785e-16	5.02912e-15
SELP	0.267645	0.179061	1.27384	1.23098	0.157742	0.127218	2.50716	2.35976	3.90217	1.68918	2.28635e-16	6.83039e-15
GORASP1	5.00389	5.45146	33.3107	36.335	6.38278	6.27515	74.8997	63.451	3.31337	6.77174	2.35472e-16	7.01421e-15
UBL4A	3.21788	3.96957	0.359879	0.438281	2.63299	2.18989	0.200707	0.146561	-4.16591	1.99044	2.57742e-16	7.6553e-15
EMC2	5.26361	5.70147	35.45	34.8952	7.21088	6.60278	73.9666	72.8506	3.33665	5.22699	2.87378e-16	8.51088e-15
PSMG2	2.82581	3.20652	10.608	12.4676	2.873	2.78236	32.992	30.6117	3.41333	3.79001	2.91775e-16	8.61618e-15
RGAG4	0.289712	0.227238	0.624599	0.579657	0.106805	0.112256	2.08428	1.60503	3.90865	1.61607	2.95795e-16	8.7098e-15
ORAI3	19.3975	21.8787	4.86338	5.938	26.194	25.2974	2.96844	2.52559	-3.37447	4.90111	3.01999e-16	8.86701e-15
ARHGEF3	1.01437	0.700858	4.73245	3.59187	0.678131	0.791846	10.1112	7.27574	3.42331	3.87367	3.152e-16	9.22815e-15
CSRNP1	19.3907	20.9888	112.003	120.543	21.5174	22.1429	267.153	209.293	3.28194	8.30394	3.69705e-16	1.07624e-14
SP140	12.394	11.0567	60.6839	62.9272	28.8004	28.6622	244.645	279.335	3.27783	8.20928	3.91499e-16	1.13646e-14
PLSCR4	0.0315151	0.022177	2.00095	1.10793	0.0168029	0.0201627	1.61569	0.802033	5.56929	1.27556	4.35671e-16	1.26111e-14
DDX60L	25.2865	19.2962	232.286	165.044	26.7364	27.7082	326.564	257.743	3.26905	9.83922	4.47681e-16	1.29222e-14
KIAA0319L	6.09058	5.83268	15.2644	17.8189	8.43853	7.99504	69.9466	81.0118	3.26306	6.99739	5.3519e-16	1.54047e-14
PDZD8	6.72042	4.56562	1.97807	1.22571	8.48073	10.387	1.006	0.84079	-3.3343	4.83707	5.86368e-16	1.68306e-14
STAT2	17.2335	15.838	437.382	416.837	56.7132	55.9748	710.129	538.942	3.24837	10.321	6.38927e-16	1.82819e-14
ZDHHC7	31.3226	30.2502	8.49688	7.55774	24.0628	24.1667	3.58333	2.43001	-3.30772	5.75499	6.40501e-16	1.82819e-14
PARP14	11.6689	9.64256	260.837	200.711	46.5297	48.0772	546.511	438.182	3.2353	10.5557	7.99303e-16	2.27513e-14
P2RY6	0.417378	0.58095	1.65036	1.5892	0.223631	0.177521	2.74766	2.99308	3.74174	1.78797	8.14028e-16	2.30812e-14
FRMD3	1.65467	1.27155	1.25289	0.718582	0.4013	0.518528	4.69818	4.2614	3.40838	3.29134	8.15397e-16	2.30812e-14
GTF2B	21.4914	22.1061	88.5373	94.6621	34.1342	33.0993	311.975	320.503	3.23104	7.57383	9.12553e-16	2.57601e-14
GNB4	9.09964	6.74727	50.6276	31.7207	6.89081	7.13679	74.4874	64.7108	3.23125	7.65842	9.26067e-16	2.60698e-14
FMNL2	0.0925918	0.0753881	0.639356	0.403414	0.0764918	0.102336	1.57162	1.15116	3.91066	1.52394	1.02056e-15	2.86512e-14
C17orf59	8.07925	9.56445	2.09802	2.39155	10.3771	8.90702	0.951612	0.945938	-3.45529	3.38061	1.02573e-15	2.86926e-14
PSMA4	29.6476	33.7695	73.8691	80.4289	46.652	45.6197	376.579	435.958	3.22417	7.42069	1.02764e-15	2.86926e-14
LGALS9	5.38195	5.94565	94.2631	114.976	80.2614	70.2861	690.388	748.191	3.22063	8.64041	1.04956e-15	2.92251e-14
XAF1	3.64979	3.42663	91.5558	86.7825	36.259	39.1462	319.478	337.81	3.2198	8.70013	1.06705e-15	2.96316e-14
NME8	0.491502	0.469105	1.04913	0.690371	1.30159	1.09293	10.2942	13.1415	3.33565	3.04439	1.16768e-15	3.23383e-14
KIAA1958	0.304475	0.177018	1.3689	0.891811	0.15212	0.249273	2.27513	1.73212	3.5089	2.77675	1.17196e-15	3.23696e-14
CMAHP	0.196909	0.379493	4.70612	3.46021	0.464175	0.400449	6.28292	5.28008	3.50746	2.70993	1.20227e-15	3.31174e-14
RHOB	79.6458	88.6462	19.5651	19.9694	112.107	106.77	14.2237	12.0571	-3.21691	7.07058	1.30261e-15	3.5785e-14
SNTB1	0.775142	0.59349	1.62817	1.0022	0.967849	1.2299	12.6797	9.44036	3.2859	4.1389	1.35446e-15	3.71101e-14
PSMA3	10.6183	11.2975	74.5038	79.8178	23.1164	23.2443	183.085	213.97	3.2104	6.27265	1.44291e-15	3.9428e-14
BATF	2.26954	3.23262	24.7602	35.3978	6.27977	4.4648	43.0822	60.4512	3.26692	4.40303	1.46531e-15	3.99335e-14
IFI44L	0.274725	0.23812	24.5613	21.1699	24.6396	25.0974	239.208	226.391	3.19976	8.69286	1.50751e-15	4.09748e-14
RIF1	2.34248	1.61375	11.2676	7.18475	0.843449	0.892073	9.91467	7.98631	3.24311	5.70903	1.53875e-15	4.17132e-14
ENC1	2.24997	1.94527	0.264876	0.224263	2.78085	3.16132	0.425858	0.249993	-3.47528	3.00786	1.67752e-15	4.5355e-14
MAP1S	22.9317	27.5806	9.27346	11.2569	29.5341	30.0559	3.49886	3.14031	-3.23337	5.87781	1.70503e-15	4.59775e-14
CD68	23.0301	25.13	86.072	107.406	29.9456	28.1478	262.606	272.602	3.18637	7.59782	1.98551e-15	5.34004e-14
XRN1	7.51761	5.16072	42.7372	25.1509	5.3832	5.63003	78.5211	48.6631	3.17628	8.1157	2.36752e-15	6.35078e-14
ANKFY1	4.64126	4.02509	47.5034	37.7861	5.21288	4.96397	61.7939	47.1542	3.17722	7.76409	2.37689e-15	6.35926e-14
PLEC	31.2877	31.7826	10.0143	12.1491	59.5603	63.7097	6.39341	6.61192	-3.17121	8.7226	2.53236e-15	6.75757e-14
PLAGL2	14.406	11.5652	5.88683	4.05932	3.92892	4.6392	0.406142	0.381418	-3.3645	5.00276	2.58159e-15	6.87106e-14
PSMA2	8.66308	10.6319	17.6984	19.4217	10.5187	8.81393	92.2541	96.1198	3.19185	5.59532	2.62336e-15	6.96415e-14
SLC16A6	25.9557	20.2348	5.69271	4.63291	15.0926	15.0684	1.74128	1.61015	-3.2285	5.47773	3.02086e-15	7.99866e-14
GBP5	38.1598	34.0054	355.734	321.691	157.749	173.86	1496.22	1404.28	3.15413	10.9775	3.25144e-15	8.58698e-14
TRIM5	5.08123	5.13413	81.6393	59.7393	9.27836	9.33604	104.814	82.9411	3.16013	7.35522	3.26881e-15	8.61067e-14
ADRB2	1.45182	1.7951	3.11782	3.02182	1.07573	1.05686	11.8148	10.6999	3.31403	3.1211	3.43806e-15	9.03329e-14
SSBP1	2.6353	2.60363	6.17283	7.96305	2.36169	1.82806	17.4932	23.3093	3.30285	3.03374	3.68036e-15	9.64517e-14
TPRG1L	39.0588	42.2636	12.0556	11.6649	48.5273	46.1486	5.20138	5.35907	-3.17871	5.99649	3.92746e-15	1.02665e-13
JUN	6.98222	8.22429	1.52287	2.36707	8.15228	8.08738	0.834454	0.8281	-3.29918	3.9468	4.10638e-15	1.07069e-13
C3	1.0636	1.04961	3.72541	4.24695	2.31079	2.45898	22.3146	20.8656	3.17463	5.21873	4.13278e-15	1.07484e-13
AGRN	0.159752	0.181533	6.99536	8.25964	2.06522	1.76774	17.0966	18.4922	3.16252	5.66848	4.35629e-15	1.1301e-13
CNIH4	1.38035	1.77236	14.7007	15.4668	3.05154	2.87269	27.464	28.1018	3.20298	4.4739	4.42186e-15	1.14421e-13
GPR171	0.144438	0.254689	0.940603	0.752286	0.340299	0.47611	4.80326	4.21009	3.6283	1.42442	5.00108e-15	1.29083e-13
UBR1	1.29019	1.16848	6.69673	4.36475	0.831211	0.846124	10.4212	7.57675	3.18823	5.00678	5.15013e-15	1.32596e-13
DNAJC1	3.08747	3.1581	10.7788	12.504	6.01535	5.75542	43.4715	53.6749	3.15749	5.17782	5.22204e-15	1.34111e-13
RHOC	1.62447	1.79676	3.86038	5.2796	3.30151	2.84872	25.8035	30.4807	3.20661	3.7122	5.29145e-15	1.35554e-13
RHBDF2	16.8542	19.2464	173.615	195.504	27.7085	28.2456	276.579	241.253	3.12214	8.78522	5.82622e-15	1.48881e-13
FAM220A	4.54063	4.64279	1.3847	1.1911	4.46519	4.92996	0.582503	0.37025	-3.59165	2.6252	5.85171e-15	1.4916e-13
TOR3A	0.820175	1.02647	3.17933	4.10141	1.46966	1.23753	12.9256	13.8451	3.23569	3.35773	6.91533e-15	1.75835e-13
LINC01093	0.317836	0.274878	11.5257	11.7166	0.303022	0.241978	3.11305	3.98672	3.71682	2.59362	7.37013e-15	1.86935e-13
FOXN3-AS1	0.381061	0.652761	0.707746	0.931417	0.293226	0.436633	4.05576	4.55594	3.95634	0.706213	7.92399e-15	2.00487e-13
TDRD7	6.75801	5.76799	85.6281	64.6621	8.87238	10.1643	96.5511	76.4959	3.10798	7.38288	8.03285e-15	2.0274e-13
KIAA0226	5.04694	4.59468	21.381	19.6818	7.52835	7.05597	87.9528	64.5641	3.10032	7.56481	8.77579e-15	2.20947e-13
IFI44	1.20099	1.04831	102.846	87.2022	61.9437	61.919	578.94	528.935	3.09406	8.26323	9.39942e-15	2.36068e-13
TMSB10	75.2913	87.3554	368.973	548.968	618.15	480.165	3608.38	5265.89	3.09065	9.3793	9.73001e-15	2.43773e-13
LFNG	44.661	52.8177	12.9849	15.9948	54.4807	50.3325	5.38824	6.28211	-3.1164	6.17282	1.0453e-14	2.61247e-13
ZBTB1	6.72634	5.40237	1.70132	0.828656	4.33849	4.56082	0.557693	0.433541	-3.32273	3.66596	1.04877e-14	2.61477e-13
ARL2	0.233712	0.328516	1.91669	3.19111	0.322249	0.326378	2.77237	4.95633	3.9417	0.796915	1.07437e-14	2.67211e-13
UBE2L6	23.4744	26.5145	422.306	510.401	130.08	120.644	1007.48	1099.86	3.07984	9.40197	1.17637e-14	2.91871e-13
HVCN1	33.598	34.5431	7.64805	7.53114	71.4333	64.5273	8.642	8.26269	-3.11189	5.68092	1.1825e-14	2.92684e-13
RILPL1	1.01461	1.29389	3.64804	4.46098	1.27282	1.32558	10.6341	11.6117	3.18936	3.5335	1.23907e-14	3.05945e-13
DAGLB	15.2392	15.7618	3.46903	4.4156	26.6082	24.2755	2.74164	3.04808	-3.12586	5.12141	1.24627e-14	3.06985e-13
HSBP1L1	0.708417	0.642337	2.75778	5.12287	0.396487	0.248211	5.0778	6.14601	3.9529	0.99628	1.32346e-14	3.25215e-13
ABCD1	3.89044	4.60709	15.6333	18.9368	4.71117	4.89002	39.252	40.1366	3.09074	5.91877	1.40489e-14	3.44401e-13
TOR1B	15.1309	15.1083	136.729	132.882	18.8932	21.4379	179.87	158.907	3.07223	7.87663	1.41745e-14	3.4665e-13
ZRSR2	7.02328	7.12016	20.2755	23.5351	9.77657	8.84944	63.4179	83.4909	3.09419	5.40002	1.43387e-14	3.4983e-13
KIF22	1.28004	1.36811	2.83134	2.9602	1.13665	0.91176	9.02779	10.5586	3.2154	3.08728	1.4383e-14	3.50077e-13
PRF1	2.30913	8.89309	13.627	14.4448	0.917803	4.68989	8.8361	8.55402	3.22017	4.30399	1.44372e-14	3.50563e-13
C21orf91	0.893399	0.790085	3.86869	2.27484	1.11366	1.17543	11.5902	9.73874	3.12836	4.41721	1.5334e-14	3.71459e-13
DUSP7	2.69342	2.9437	0.551615	0.562981	2.25362	2.28543	0.191157	0.176937	-3.67022	2.25269	1.67372e-14	4.04495e-13
COA6	1.84688	2.14386	5.09766	6.63626	4.1766	3.7854	30.5769	36.9131	3.14364	3.53482	1.76176e-14	4.24771e-13
PHF13	6.65562	7.22896	3.09359	2.63858	4.52259	4.85015	0.488665	0.459585	-3.29851	3.78508	1.78379e-14	4.29072e-13
RSPH9	0.330211	0.790302	3.96017	4.45381	1.22069	1.43612	11.6491	12.3628	3.3399	2.20174	1.90799e-14	4.57873e-13
SMAD3	1.26329	0.928991	2.09896	1.90689	0.929005	1.0564	10.7188	8.03317	3.11214	4.39259	2.14773e-14	5.14201e-13
SP110	60.2095	57.9781	445.106	484.119	110.116	111.443	795.777	908.158	3.04392	9.90337	2.15562e-14	5.14886e-13
MASTL	1.13855	0.909215	6.91654	4.7153	0.79396	0.765702	9.60182	7.13237	3.1671	3.85853	2.25136e-14	5.36504e-13
ISG20	40.0802	46.0871	180.522	236.249	105.576	91.7282	703.394	867.083	3.03788	10.0341	2.37859e-14	5.65507e-13
NHLRC3	0.345117	0.346544	0.715611	0.586842	0.130366	0.282786	1.96137	1.63153	3.6447	1.42323	2.39219e-14	5.67425e-13
DDX20	3.71236	3.92667	0.981674	0.495276	2.37521	2.53357	0.168099	0.205315	-3.53158	2.6718	2.95571e-14	6.99474e-13
LY6E	3.49768	5.16581	129.763	168.626	121.051	99.2192	780.429	984.158	3.02328	8.39626	3.09956e-14	7.31824e-13
TP53INP1	58.8108	39.6368	11.8908	8.06978	31.4409	30.6292	4.5062	3.83946	-3.03365	7.06024	3.20283e-14	7.54469e-13
SORT1	3.12768	2.51947	14.1127	11.091	3.26966	4.05564	35.3747	26.6679	3.02787	6.45908	3.31414e-14	7.78898e-13
CORO1C	70.9719	59.3178	16.9397	13.5134	39.4832	40.8452	6.78236	4.79757	-3.04084	6.96165	3.39391e-14	7.95822e-13
C16orf54	89.385	96.8946	29.4288	27.8368	68.9006	71.5332	9.69231	8.4833	-3.0218	7.02848	3.8995e-14	9.12286e-13
SDHAF3	0.522804	0.533007	5.70416	5.25373	0.80792	0.545455	9.45659	7.50311	3.21496	2.96529	3.97985e-14	9.28963e-13
CMTR1	5.18995	5.36303	71.3688	76.5283	12.7526	13.0204	123.119	102.143	3.00171	7.72179	4.67644e-14	1.08908e-12
IL15RA	1.0709	1.22324	6.14654	6.62186	4.81287	4.76823	36.9977	39.5312	3.03798	4.54952	4.77977e-14	1.11062e-12
EHD4	4.11751	3.81231	5.73855	5.95238	1.67713	1.65867	17.6936	14.0852	3.07004	4.30821	5.32701e-14	1.23497e-12
RUNX2	27.4436	18.6976	7.64246	4.15301	14.4651	15.5081	2.52027	1.77574	-3.02605	6.00123	6.3685e-14	1.47309e-12
BMPR2	0.422176	0.385172	2.04832	1.34209	0.434065	0.51386	5.07328	3.59355	3.04935	4.38203	6.8279e-14	1.5758e-12
ACTA2	0.216255	0.295012	2.04105	2.13905	1.75298	1.82647	14.2328	14.8942	3.08674	3.04024	8.15927e-14	1.87043e-12
APOBEC3C	1.84192	1.76456	5.31257	6.41125	4.50807	3.48303	35.7599	37.0339	3.03819	3.73695	8.80193e-14	2.01325e-12
CDKN2AIP	5.97262	5.47942	1.46142	1.24848	3.20887	3.56994	0.519668	0.282694	-3.50414	2.70178	8.90732e-14	2.03281e-12
ARPIN	0.431315	0.413405	1.06181	0.897554	0.267517	0.252783	2.96367	2.39793	3.16386	2.81932	9.25775e-14	2.10809e-12
NUP62	4.05514	4.4982	12.2385	13.3626	4.4537	4.34862	37.7412	35.09	2.97796	5.69809	9.75787e-14	2.21705e-12
MRPL16	0.90982	0.833976	1.48868	1.92002	1.3436	1.47236	10.1118	12.0725	3.1673	2.15931	1.11799e-13	2.53453e-12
LETM2	4.559	4.42759	0.823079	0.785824	3.41672	3.55952	0.611293	0.335302	-3.34866	2.7524	1.17775e-13	2.66411e-12
TRAF3IP3	42.75	41.2644	9.75958	10.7717	33.3272	30.7566	3.64111	4.19485	-2.98997	5.64619	1.20964e-13	2.72469e-12
CXCL6	5.74991	5.46983	2.37756	2.08203	6.1368	5.58197	0.946062	0.613558	-3.32182	2.59796	1.20985e-13	2.72469e-12
MIR5193	5.70638	3.74308	32.2653	31.5015	11.1866	9.527	111.963	104.782	3.22721	2.08505	1.22537e-13	2.75359e-12
PPP1CC	35.7237	30.2459	11.4915	8.40339	34.7944	34.4222	5.70724	4.41036	-2.97985	5.69771	1.27107e-13	2.85004e-12
SIPA1L2	7.58052	6.54277	37.4403	30.3381	5.51972	5.73913	47.1503	42.4655	2.94362	7.21186	1.28229e-13	2.86892e-12
ATG9A	18.9659	22.0389	6.11449	6.59504	24.6976	24.8842	3.20773	3.14382	-2.97375	5.71245	1.3353e-13	2.98101e-12
AFF1	6.07604	4.24729	36.2845	23.9683	5.3229	6.12494	57.6422	40.7312	2.93584	7.7244	1.41436e-13	3.15063e-12
HMGCR	11.7069	9.94316	4.68568	2.733	4.7774	5.52602	0.928878	0.557315	-3.09951	4.55176	1.44257e-13	3.20651e-12
STK3	1.52116	1.24126	5.75218	4.27759	1.40798	1.46582	14.3509	11.374	3.01396	4.03726	1.54722e-13	3.42856e-12
LSM4	0.696924	1.1531	1.22442	1.90384	1.24405	1.34735	8.31257	10.5742	3.08726	2.59664	1.54916e-13	3.42856e-12
ELK1	2.54392	2.56637	5.75449	6.44035	1.50478	1.31802	13.677	12.131	3.01099	4.06794	1.56013e-13	3.4454e-12
PDSS1	0.0574874	0.0698194	0.720609	0.922945	0.058424	0.156369	2.00781	1.42517	4.60389	0.148192	1.56739e-13	3.454e-12
HCAR2	50.9779	56.5482	203.031	205.493	84.3854	84.7805	693.077	640.572	2.92429	9.0255	1.61837e-13	3.55869e-12
RARRES3	1.44527	2.01168	8.72587	10.4957	12.4889	9.89886	70.8995	97.4632	2.96417	4.35177	1.62453e-13	3.56457e-12
SPEN	29.0867	24.4602	8.06029	7.0595	15.4899	19.1308	2.41948	2.02804	-2.93315	7.3638	1.67808e-13	3.66637e-12
LGALS9C	1.44327	1.63182	8.75978	10.4453	7.46728	6.719	55.842	57.5669	2.94656	5.00957	1.79426e-13	3.91186e-12
TTC39B	0.0702356	0.0647993	0.306567	0.213667	0.243862	0.231324	3.27898	2.43895	3.32162	1.48414	1.83459e-13	3.99131e-12
MAST3	118.392	121.323	38.3715	39.4389	118.736	131.798	18.1555	15.7122	-2.9178	8.79261	1.86222e-13	4.04284e-12
PRR5	0.349782	0.592469	0.864954	1.15159	0.642978	0.380124	5.34398	5.65067	3.13534	2.26191	1.8886e-13	4.09144e-12
ZMYND10	1.23972	1.47452	0.173381	0.240384	2.43729	2.22763	0.0636979	0.166984	-3.86611	0.888078	1.91224e-13	4.1339e-12
PLEKHG3	126.012	133.486	35.1631	40.537	125.313	132.885	19.0817	16.6062	-2.91573	8.51113	1.94865e-13	4.19499e-12
UNC119B	5.74539	5.09184	1.4726	1.34083	4.50574	4.48197	0.763075	0.529221	-3.08965	3.72525	1.94869e-13	4.19499e-12
DDX28	1.31767	1.28515	0.23892	0.229238	1.28044	0.922156	0.0440532	0.0677412	-4.23805	0.847547	1.99697e-13	4.28993e-12
GPCPD1	123.396	101.525	41.1176	29.3858	74.7145	74.7474	12.832	9.90107	-2.91572	8.31806	2.00493e-13	4.29801e-12
RBCK1	34.1791	36.5322	205.248	244.408	71.2421	65.7334	516.313	534.891	2.90844	9.2043	2.09936e-13	4.49106e-12
TRIM56	22.4839	23.3577	114.9	142.259	43.3176	42.3223	274.415	325.18	2.90821	9.18845	2.10571e-13	4.49525e-12
FOXJ2	14.6096	12.3269	3.25364	2.66434	9.15965	10.4931	1.44003	1.16617	-2.97346	5.24107	2.16515e-13	4.61254e-12
ALG11	0.82583	0.580805	2.98204	2.78789	0.51851	0.632883	4.94336	4.64584	3.1632	2.52616	2.25063e-13	4.78468e-12
USP25	7.68601	5.60733	34.3656	22.149	6.84753	7.93549	75.0158	51.2923	2.90508	7.13818	2.42668e-13	5.14828e-12
BHLHE40	84.6157	80.8604	47.9648	46.4643	58.6195	63.4867	9.57521	7.80561	-2.90878	7.24335	2.53841e-13	5.3742e-12
CCDC85B	1.14278	1.29903	4.58942	6.35141	1.49861	1.05992	9.58781	12.7085	3.08388	2.56167	2.69165e-13	5.68687e-12
TIMM10	0.810722	0.93363	17.5144	21.1553	17.759	14.3347	131.668	134.73	2.92342	4.83592	2.78004e-13	5.86154e-12
MVB12A	1.47459	1.59621	10.5143	13.6974	3.82366	3.36225	24.6257	29.6505	2.95496	4.01576	2.88575e-13	6.07193e-12
CCDC101	2.57569	2.74682	6.6661	7.93407	3.01387	3.47209	18.9183	23.9755	2.99176	3.31994	3.09716e-13	6.5034e-12
PIP4K2C	9.50373	9.76549	3.48276	3.38261	10.0654	9.40774	2.10463	1.27038	-2.98598	4.30442	3.47638e-13	7.28475e-12
MLKL	28.5759	26.1661	181.298	182.681	29.4851	30.0362	230.942	216.593	2.87693	8.17999	3.6548e-13	7.643e-12
TNFAIP6	56.6038	51.8232	285.218	231.126	84.5723	91.0111	757.259	619.976	2.87395	8.59851	3.75825e-13	7.84334e-12
EXOC6	2.27605	1.9804	8.37776	6.64709	2.52207	2.79358	23.1775	18.9885	2.9124	4.91755	3.91291e-13	8.14952e-12
KLF16	16.795	20.4051	10.5378	14.8505	21.1421	19.5892	2.71502	2.78923	-2.92213	5.29717	4.08179e-13	8.48399e-12
KIAA0895L	0.205166	0.19231	2.0192	2.21735	0.439981	0.443048	4.25612	3.78172	3.10326	2.52933	4.18803e-13	8.68719e-12
HEY1	2.44019	2.42758	1.15489	0.878249	5.56887	5.04708	0.717342	0.635032	-3.13221	2.45508	5.13437e-13	1.06287e-11
GZMB	3.36475	9.56066	13.184	24.1326	1.83452	2.99831	7.55798	15.2496	3.05506	3.17683	5.34362e-13	1.10395e-11
VAMP8	1.23002	1.09605	3.61405	3.29304	2.14161	2.09194	12.9859	17.7823	3.05344	2.10556	5.43929e-13	1.12146e-11
PLAU	18.9583	18.4817	8.85032	8.34103	42.1029	41.6163	7.1707	5.74203	-2.87426	5.65475	5.97414e-13	1.22926e-11
YPEL2	4.39128	3.46603	1.09431	0.671896	2.98207	3.31272	0.439055	0.360251	-3.04903	3.45755	6.60156e-13	1.35292e-11
FAM65A	81.7597	81.7678	25.3081	27.4007	106.166	113.446	16.4571	14.8413	-2.83863	7.94902	7.03935e-13	1.43977e-11
MAP3K14	7.97019	8.25056	2.74323	2.82854	4.1489	4.38612	0.705615	0.514141	-3.01232	4.14885	7.23998e-13	1.47785e-11
TCN2	0.0521855	0.024857	1.00969	1.31216	0.241409	0.210826	2.58086	2.54744	3.39868	1.05519	7.95938e-13	1.61825e-11
ZNF672	5.90738	7.20306	23.5636	26.6366	5.23255	5.27749	40.1093	37.5521	2.84328	5.87149	8.7831e-13	1.78219e-11
CHRNB1	2.07235	2.11954	7.53341	8.67532	3.10322	3.07307	19.9364	22.6973	2.87063	4.39899	9.07557e-13	1.83789e-11
LRRC8A	5.9113	6.16155	1.9422	2.5232	3.52647	4.26603	0.599803	0.434498	-3.02061	3.87872	9.19943e-13	1.8593e-11
LOC257396	0.268822	0.141029	0.47192	0.39741	0.172153	0.325342	1.53605	1.94494	3.49696	0.653573	9.22448e-13	1.86069e-11
PUS3	0.148796	0.141259	1.18605	1.40795	0.20126	0.155329	2.38397	2.32511	3.52907	0.884278	9.41296e-13	1.89498e-11
CREM	7.46862	7.85034	22.4443	23.8345	7.05327	6.82953	47.1347	50.3344	2.83516	5.87502	9.47391e-13	1.90351e-11
SSH3	28.0857	30.9422	9.27525	10.4331	44.626	41.1872	5.6893	6.23198	-2.8401	5.98947	9.69406e-13	1.94394e-11
HYAL2	5.56292	6.6339	1.9594	2.53182	7.16893	6.41407	0.76642	0.894033	-3.00318	3.27526	9.88026e-13	1.9774e-11
SP100	25.407	23.8109	189.486	190.104	45.4215	49.1545	313.668	317.258	2.80421	9.62042	1.15549e-12	2.30806e-11
AMPD3	24.9468	22.0716	9.61514	8.05528	19.0048	19.7046	3.72315	2.65304	-2.84061	5.94082	1.18688e-12	2.36613e-11
MIR7844	47.9618	38.3083	15.2018	10.2314	26.4693	30.5655	6.21261	1.64336	-4.0075	1.45634	1.19923e-12	2.38276e-11
NDUFB6	12.4132	14.0088	46.0905	66.5664	27.7156	24.7302	141.88	194.536	2.81125	5.82867	1.19987e-12	2.38276e-11
CASP7	0.26415	0.228678	0.678601	0.598915	0.369929	0.372506	4.26403	3.20496	3.11459	1.75518	1.28977e-12	2.55141e-11
CXCL1	32.106	34.1579	22.0757	21.883	66.7989	62.9784	9.5339	9.35296	-2.83629	5.27127	1.30273e-12	2.57208e-11
AKAP13	8.15177	7.53045	31.9107	30.1582	8.3228	8.93327	62.801	57.8558	2.79732	8.4892	1.31846e-12	2.59813e-11
TOP1	41.4834	38.2523	114.201	107.157	44.6448	47.4087	295.066	309.845	2.79498	8.86336	1.35277e-12	2.66063e-11
OPTN	0.664526	0.810602	2.07366	2.16973	0.651697	0.799751	4.30311	5.00005	2.9395	2.89211	1.4574e-12	2.86091e-11
FANCA	2.79414	2.74067	20.8922	22.9668	5.59911	5.4445	44.519	38.8686	2.79533	6.61832	1.49782e-12	2.93464e-11
RPL28	12.7	16.9636	30.7138	45.3884	27.641	20.9383	131.095	191.039	2.78898	8.03418	1.5043e-12	2.94171e-11
ARID3B	21.9109	22.2047	5.69565	6.55227	23.5008	25.0834	3.81793	3.33293	-2.81782	5.90543	1.53361e-12	2.99331e-11
SNX2	3.89886	3.72967	15.0536	13.0048	4.28473	4.41911	32.0596	29.6579	2.79112	6.55946	1.60427e-12	3.12528e-11
GSTK1	17.4086	19.3335	142.698	162.499	40.0395	32.9205	250.182	274.429	2.77693	7.16986	1.91993e-12	3.73312e-11
ZNRF2	3.65243	3.20889	14.1804	11.8953	3.91774	3.75351	37.1582	27.1329	2.79192	5.50402	2.19823e-12	4.26614e-11
KCTD5	7.91679	8.69527	4.27216	3.93162	6.70896	6.95558	2.13707	0.865827	-2.95375	3.68027	2.28919e-12	4.43428e-11
POM121C	19.0053	18.0152	5.93618	5.72206	7.27246	8.99581	1.50345	1.02244	-2.83036	5.62993	2.46866e-12	4.7729e-11
CEP85	0.667652	0.57523	0.744414	0.785741	0.2631	0.29005	3.21483	2.19891	3.06275	2.20782	2.53769e-12	4.89711e-11
GMCL1P1	1.68642	0.904992	0.528874	0.238374	1.01015	0.972727	0.297599	0.0601165	-4.06826	1.0914	2.64064e-12	5.08325e-11
FAM53B	19.6983	20.4485	4.2989	5.35207	16.8915	17.7425	2.65756	2.45149	-2.78454	6.0067	2.64406e-12	5.08325e-11
CD300LB	24.7272	27.325	6.65727	7.60458	30.3129	26.7292	3.66084	4.36326	-2.79642	5.23742	2.69911e-12	5.17936e-11
LOC101927780	0.50219	0.372746	2.7297	2.92674	0.641237	0.545498	3.81442	4.64569	2.85685	3.383	2.82538e-12	5.41153e-11
TARS	1.25562	1.22307	4.96169	5.19752	0.716879	0.784044	6.54039	5.39921	2.91277	3.28613	2.9457e-12	5.62097e-11
TRIB3	4.47368	5.29472	1.13721	1.56953	6.22159	5.36312	0.687351	0.807673	-2.94525	2.99912	2.95298e-12	5.62439e-11
NUCB1	22.4049	27.4274	127.659	157.996	39.2895	34.331	247.128	263.507	2.74562	8.21197	3.04711e-12	5.79291e-11
BICD2	23.9194	20.2617	5.25243	4.96007	18.2703	20.4287	3.25428	2.68736	-2.76522	6.31247	3.23428e-12	6.13734e-11
RIPK1	11.6918	11.2086	51.5573	45.1577	8.28503	9.12617	61.6352	55.6108	2.74677	6.94053	3.26037e-12	6.17542e-11
CERS6	0.527589	0.396884	0.859967	0.691991	0.288332	0.361353	2.9537	2.17325	2.91386	2.82424	3.37097e-12	6.37312e-11
WARS	68.8563	67.3599	301.328	275.86	53.7913	57.4769	417.017	358.759	2.73757	9.17237	3.41999e-12	6.45389e-11
LOC100506639	0.577547	0.45415	1.73499	1.71675	0.656658	0.821966	7.91986	5.44189	3.05051	1.90682	3.53202e-12	6.65305e-11
C1GALT1	3.52134	2.53699	19.289	13.2762	3.81423	4.11059	30.7947	25.5485	2.74376	6.32608	3.57335e-12	6.71856e-11
STX17	1.63467	1.33497	8.54287	6.35714	1.66064	1.57762	14.3131	11.2844	2.76449	5.33427	3.63891e-12	6.82929e-11
DTNBP1	1.20588	1.62647	9.67002	12.6166	2.36877	2.16284	14.6283	16.5773	2.80693	3.99571	3.7168e-12	6.96105e-11
EIF4A3	11.3584	12.8542	39.7717	45.1144	9.38062	7.99085	63.606	63.3114	2.75469	5.77977	3.7227e-12	6.96105e-11
BCAT1	1.21128	0.784431	0.235945	0.186073	1.84763	1.88702	0.396643	0.246095	-2.90822	3.04659	3.7723e-12	7.04094e-11
MRPL32	0.900628	1.11889	1.28049	1.78862	0.581434	0.620864	5.61852	5.66745	3.28424	0.982841	3.78531e-12	7.05237e-11
RIPK2	3.28675	3.62931	25.5395	21.0023	9.08157	9.57525	69.3311	60.6461	2.73938	6.02928	3.84198e-12	7.14496e-11
GRINA	47.9151	57.4739	312.069	336.685	67.3317	65.93	458.831	446.725	2.73003	8.78491	3.87621e-12	7.19557e-11
PNP	1.14339	1.32114	0.795479	0.777114	3.77875	4.10808	0.347747	0.451137	-3.06591	1.96204	3.99518e-12	7.40301e-11
TRIM38	20.9217	20.2643	136.012	130.432	38.6189	41.549	251.73	255.654	2.72681	9.29895	4.03259e-12	7.45883e-11
TACSTD2	0.737847	0.594409	1.5942	1.35159	1.52292	1.10608	10.4416	10.8917	2.83819	2.87267	4.06025e-12	7.49647e-11
LINC00152	14.5353	20.5621	45.8179	68.7774	63.1	50.9045	302.426	418.046	2.72794	6.63178	4.2085e-12	7.75621e-11
KLHL12	6.10354	5.36172	2.80276	2.48942	4.04613	4.02869	0.846975	0.522083	-2.95397	3.47202	4.48057e-12	8.24281e-11
PCNXL4	5.51641	4.44627	1.37759	0.935594	3.36304	3.47294	0.498808	0.435261	-2.94959	3.3082	4.50477e-12	8.27247e-11
LOC100996455	0.148535	0.141867	1.04925	1.16266	0.235789	0.298902	2.31727	2.25088	3.2542	1.17205	4.79784e-12	8.7949e-11
TWF2	86.4334	104.351	34.1389	45.0989	163.608	144.101	20.1165	24.8322	-2.71995	6.98334	5.00814e-12	9.16401e-11
KCNS1	2.32468	2.23213	0.45045	0.315499	0.760195	0.659547	0.00667939	0.0550848	-3.78498	1.97032	5.14281e-12	9.39365e-11
CD93	165.728	131.272	58.4239	45.394	67.7789	71.9362	12.6378	10.3282	-2.71425	8.88281	5.20638e-12	9.49285e-11
CASP4	80.292	88.3209	443.833	526.69	164.304	160.434	964.83	1075.3	2.7103	9.1949	5.24779e-12	9.55135e-11
APOL2	49.5116	49.1631	256.773	303.138	134.041	132.094	795.804	873.804	2.70463	9.76662	5.70281e-12	1.03428e-10
RNF4	21.7709	21.1981	9.72318	7.67088	13.9508	14.6634	2.41113	2.05593	-2.76243	5.34816	5.83933e-12	1.05717e-10
OTUD1	21.863	21.0482	7.23247	5.98443	15.2002	16.2774	2.94043	2.23663	-2.76463	5.17615	5.86316e-12	1.05961e-10
CLEC4D	7.76907	7.67311	37.7585	36.1613	7.28549	7.37188	47.3333	48.3112	2.72923	5.59353	5.87993e-12	1.06077e-10
AKTIP	10.143	9.59307	3.11609	2.70466	6.14744	6.5176	0.960558	0.820663	-2.90494	3.6546	6.02546e-12	1.08511e-10
KLHL26	0.305733	0.343308	1.90235	2.08769	0.296063	0.343327	3.27259	2.45233	3.04975	2.10737	6.13833e-12	1.1035e-10
PTGS2	22.1447	15.1142	10.8303	5.92832	14.1513	16.7157	3.44497	2.11199	-2.74422	5.66796	6.19374e-12	1.10987e-10
ZDHHC19	0.657389	0.810847	4.69079	6.46367	2.20842	2.45159	11.7862	15.638	2.82384	2.90414	6.1954e-12	1.10987e-10
MIR4435-2HG	2.86178	3.13428	3.3569	8.39942	5.81616	4.74453	23.2241	39.8282	2.77557	3.18134	6.25108e-12	1.11788e-10
C17orf62	35.0728	40.4338	235.472	286.94	53.941	49.735	339.987	350.492	2.69992	8.71868	6.26938e-12	1.1192e-10
UTP14C	1.43553	1.01649	4.48872	3.8792	0.797501	0.910198	5.46692	5.48391	2.78156	4.02192	6.30515e-12	1.12363e-10
DTX3L	14.7813	11.6261	173.915	121.23	18.862	20.6731	170.859	122.552	2.69984	8.88211	6.31707e-12	1.1238e-10
BBC3	41.4882	49.9797	22.3311	27.2636	65.5652	56.1475	8.26175	9.9468	-2.7206	6.01746	6.42685e-12	1.14135e-10
DNASE1L1	10.3879	11.1753	3.13673	3.99851	14.8657	13.8815	2.19532	2.19955	-2.75665	4.62602	6.49728e-12	1.15186e-10
C1orf228	0.324289	0.388043	2.15766	2.51051	1.20515	1.37004	6.8275	8.82148	2.87161	2.31749	6.61668e-12	1.171e-10
LINC00960	0.307879	0.342961	1.64072	1.73316	1.12223	1.13006	9.00831	8.54946	2.9292	1.99324	6.70643e-12	1.18484e-10
TMCC3	49.12	39.9938	18.6969	14.8927	35.1187	39.812	6.56482	5.40723	-2.69927	7.27174	7.19733e-12	1.26938e-10
OXR1	4.53911	2.97828	1.29846	0.617316	3.27898	3.59371	0.839702	0.443001	-2.88768	3.37675	7.37202e-12	1.29796e-10
LGALS9B	0.938125	0.980952	4.41507	5.14499	3.68088	3.40333	28.3475	25.1104	2.77008	3.48534	7.47094e-12	1.31312e-10
XXYLT1-AS2	0.180552	0.0750547	0.673253	0.843755	0.8271	1.14306	6.78509	7.25883	3.13304	0.925715	7.62269e-12	1.3375e-10
CD2AP	0.360881	0.227698	1.69509	0.929335	0.279973	0.383538	3.03749	2.1161	2.91779	2.61318	7.76055e-12	1.35936e-10
CDR2	0.286133	0.205592	0.827005	0.613147	0.144176	0.155484	1.64767	1.49512	3.37332	0.872374	7.8321e-12	1.36955e-10
PAQR8	0.351381	0.335185	0.471627	0.267762	0.218435	0.201538	2.245	1.74138	2.99458	1.79408	8.12383e-12	1.41814e-10
OGFR	64.7652	75.6984	216.571	297.128	104.101	101.906	564.925	667.915	2.68168	9.30641	8.25097e-12	1.43789e-10
NPRL2	11.146	12.1686	3.01261	3.4014	17.7096	16.8936	1.68322	2.57662	-2.78089	3.83967	8.3905e-12	1.45972e-10
CDK5R1	2.27512	2.16955	0.438086	0.366276	1.53165	1.51392	0.211186	0.167708	-3.19045	2.0814	9.19613e-12	1.59716e-10
TPM1	2.926	2.6345	0.824753	0.766654	2.67236	2.33792	0.361296	0.264518	-3.33582	1.5404	9.63601e-12	1.67073e-10
CEBPA	13.4545	15.7512	3.12385	4.64319	26.2269	22.5687	4.31943	4.00208	-2.71219	4.95383	9.76238e-12	1.68978e-10
CERK	59.5986	57.864	22.8181	22.8926	55.8335	59.0189	9.57034	8.74378	-2.67479	7.36373	1.0312e-11	1.78191e-10
TNK2	29.0732	31.4467	109.24	127.499	62.3266	61.9256	370.113	395.476	2.66567	9.37546	1.06142e-11	1.83104e-10
CTCF	15.8008	13.9435	4.61024	3.78906	8.35242	9.15564	1.27169	1.23877	-2.75321	4.84323	1.08354e-11	1.86606e-10
ISL2	5.55634	6.18689	1.89596	2.48913	6.97492	6.26804	1.02837	0.936694	-2.89631	2.89016	1.09233e-11	1.87804e-10
OGDH	25.3306	25.9692	7.70099	9.01641	21.3847	22.3874	4.22893	3.31124	-2.69111	6.00496	1.15234e-11	1.97789e-10
TGFBR1	16.6563	13.6888	5.78162	3.76484	10.3798	11.5399	2.14846	1.59804	-2.69937	5.74249	1.17615e-11	2.01539e-10
FBXO44	0.414964	0.378374	1.41695	1.50794	0.65053	0.801041	3.89506	4.61146	2.82536	2.5085	1.19014e-11	2.03595e-10
CIITA	1.06174	0.797674	3.67196	3.78543	0.796367	0.84379	6.86315	5.37251	2.75399	3.75665	1.19641e-11	2.04326e-10
KDM5B	15.545	12.9711	5.50281	3.85297	9.22447	10.4833	1.81549	1.41678	-2.70281	5.60204	1.22126e-11	2.08224e-10
LGALS3BP	1.57259	1.61651	4.04646	4.35707	4.10505	3.49122	25.9804	26.5682	2.69419	4.34173	1.27891e-11	2.1769e-10
SLBP	31.3458	30.1659	16.024	15.475	34.8561	31.8816	6.20749	5.40556	-2.68886	5.58067	1.3001e-11	2.2093e-10
DAPP1	38.8517	32.2828	172.061	127.466	38.619	42.4949	327	242.579	2.65107	8.57646	1.3639e-11	2.31389e-10
PRAM1	89.144	100.609	27.5968	33.2869	98.2006	92.9241	12.2771	15.5873	-2.65535	7.01933	1.42489e-11	2.41337e-10
SERTAD2	4.78952	3.55666	1.97793	1.392	2.04446	2.17219	0.42918	0.272763	-2.90574	3.5344	1.43352e-11	2.42397e-10
TCHP	6.04719	5.44043	0.798079	0.802971	2.39548	2.51513	0.319863	0.29104	-3.0406	2.88771	1.44624e-11	2.44146e-10
TAP2	17.6639	16.9213	74.9002	74.0305	43.2522	41.7937	277.77	270.718	2.64594	9.19335	1.4511e-11	2.44564e-10
AMACR	3.62583	2.90521	0.928763	0.768445	1.51899	1.66586	0.150976	0.155876	-3.28387	2.3117	1.46129e-11	2.45876e-10
KLF4	0.536706	0.549844	0.705195	0.467364	0.365437	0.633244	3.84605	2.82994	2.95271	1.87043	1.50254e-11	2.52401e-10
TRIM44	0.780625	0.62486	1.73942	1.73191	0.465707	0.471713	3.32374	3.17474	2.76901	3.22484	1.56694e-11	2.62789e-10
IL16	40.9174	38.0398	13.1494	13.8547	43.6574	44.7891	7.35141	6.98296	-2.64431	7.76284	1.5975e-11	2.67477e-10
HSH2D	101.552	112.077	502.792	611.415	179.199	171.596	1010.39	1115.34	2.63785	10.4305	1.63375e-11	2.731e-10
STX11	18.8569	18.9266	67.0742	60.6358	27.385	28.6291	200.53	170.356	2.63709	8.67094	1.6853e-11	2.81259e-10
TRIM22	13.1831	12.2578	281.756	205.495	82.4626	82.3146	646.97	508.674	2.62493	9.46817	2.01698e-11	3.35519e-10
RBM43	1.61082	1.728	13.7247	8.15164	1.53173	1.81947	12.692	9.82243	2.68086	4.64427	2.1508e-11	3.572e-10
KLF7	20.7763	16.8694	7.59307	6.06806	11.5119	12.4784	2.20074	1.84215	-2.64364	6.38673	2.31005e-11	3.83028e-10
DEK	30.8547	28.2088	122.533	102.792	41.8703	42.6613	269.698	256.153	2.61301	8.32699	2.4739e-11	4.09533e-10
NHSL2	29.8952	25.6692	9.16248	7.80839	13.8077	16.6485	3.3181	2.18264	-2.66129	5.64188	2.63401e-11	4.35334e-10
RBSN	3.04071	2.9693	4.6426	5.47356	2.74244	2.56289	12.0126	16.9331	2.62629	5.39756	2.67211e-11	4.4092e-10
NACC2	13.3177	12.94	3.54917	3.1592	10.6006	11.7558	1.77301	1.69857	-2.64172	5.66546	2.77676e-11	4.57451e-10
PIM2	45.7085	52.8653	222.651	220.814	62.3768	66.5719	390.453	379.023	2.6032	8.62133	2.87126e-11	4.7226e-10
THRA	3.10362	2.91762	0.404051	0.476661	1.68254	1.3732	0.255032	0.167161	-3.33038	1.74059	2.89586e-11	4.75543e-10
TNFRSF10D	0.961821	0.813696	3.79296	3.26235	0.73553	0.775301	6.19415	4.8874	2.73206	3.24644	2.94124e-11	4.82222e-10
UBN2	2.09604	1.58996	7.17825	5.25195	2.06318	1.93001	14.0607	12.5788	2.60804	6.39951	2.95902e-11	4.84362e-10
GMCL1	12.0804	9.10272	2.78466	1.75092	6.94923	7.56603	1.34897	1.01459	-2.77579	3.64894	2.97969e-11	4.86968e-10
SNX18	43.0223	34.247	21.8438	13.6776	35.7682	39.3545	7.45488	5.87496	-2.60601	7.07984	3.12577e-11	5.10028e-10
YWHAG	23.9962	19.8818	8.83531	8.06252	17.4166	18.6031	3.66778	2.79689	-2.63853	5.59736	3.13101e-11	5.10072e-10
MIA3	9.08229	8.07096	31.9067	26.4346	9.55817	10.2768	67.6564	57.6694	2.593	7.80829	3.44167e-11	5.58903e-10
MBTD1	4.78841	3.69605	2.31691	1.50704	3.08054	3.2918	0.863603	0.456064	-2.75572	3.75525	3.45341e-11	5.59922e-10
PHF12	60.2629	56.586	30.6676	29.5853	44.3255	52.088	8.83704	7.33459	-2.59534	7.34067	3.66866e-11	5.93882e-10
CCDC9	13.8129	17.5294	72.9455	99.7748	22.1942	21.8595	109.465	133.505	2.58863	6.99523	3.81613e-11	6.16781e-10
SIGLEC9	83.1357	85.3214	47.7446	55.7825	100.871	109.842	17.3986	16.7404	-2.5911	6.79491	4.0028e-11	6.45932e-10
ZNF592	36.213	31.7281	13.69	13.2279	26.8807	28.448	6.28238	4.49755	-2.57935	7.36298	4.62504e-11	7.4517e-10
PXK	34.0066	30.2859	12.0806	8.10355	17.9419	20.5782	4.39486	2.92562	-2.61648	5.66334	4.81465e-11	7.74501e-10
CISD1	1.1626	1.0916	3.76371	3.98331	1.80307	1.08719	9.32073	11.446	2.66621	3.1511	4.88244e-11	7.84175e-10
ZNFX1	32.8838	27.4352	143.589	142.792	32.3027	35.2647	223.606	191.405	2.56691	9.57721	4.97955e-11	7.98521e-10
TRIM52	5.40075	4.32671	1.25875	1.06444	1.98735	1.7037	0.289945	0.212279	-3.22597	2.19484	5.03058e-11	8.05443e-10
FCHO1	35.1911	38.7279	10.7219	12.1478	51.5857	49.534	8.11433	8.6567	-2.57507	6.43616	5.15753e-11	8.24481e-10
SSTR2	0.740156	0.971274	2.3723	2.33679	1.21391	1.15661	7.18598	7.68911	2.66304	3.13468	5.26498e-11	8.40346e-10
IRF1	140.009	160.157	685.008	775.37	241.069	234.182	1385.01	1423.76	2.56219	11.13	5.29064e-11	8.43129e-10
GTPBP1	43.9222	44.829	173.707	196.97	44.4972	48.817	313.574	262.853	2.56247	9.47651	5.33814e-11	8.49377e-10
MIR4477A	1.7081	2.9123	3.5469	9.86284	5.49236	1.67931	60.1456	50.1799	3.19072	0.465747	5.96172e-11	9.47128e-10
FADS2	0.270743	0.319181	0.226993	0.110177	5.44799	5.32567	0.984101	0.841598	-2.69439	2.51579	6.10771e-11	9.68819e-10
MANSC1	31.6694	29.0821	11.8488	9.03513	20.5759	20.9322	4.60637	3.37626	-2.60741	5.2365	6.13083e-11	9.70983e-10
PEF1	15.5655	19.307	65.651	72.9682	19.8197	17.5402	107.884	116.34	2.55333	6.75012	6.68911e-11	1.05777e-09
PROC	1.11361	1.41015	0.161404	0.12753	7.89509	7.23043	0.661641	1.18414	-2.73694	2.15302	6.93194e-11	1.09448e-09
TUBB	39.3602	41.401	17.3844	16.8878	22.0091	20.7051	3.66923	3.67044	-2.58404	5.82991	7.18154e-11	1.13214e-09
ATP6V1A	101.851	77.9729	26.6534	16.5118	45.3867	48.1338	10.4867	7.75016	-2.54996	7.58676	7.31096e-11	1.15077e-09
BAZ1A	52.5693	48.2502	203.553	184.558	73.6788	74.7909	413.697	428.028	2.53838	10.1194	7.6667e-11	1.20492e-09
LOC101929331	18.3807	17.5251	14.3061	17.2121	9.49296	7.00307	0.866973	1.1699	-3.01993	2.73666	7.85642e-11	1.23284e-09
ADGRE1	3.12441	3.2215	19.8064	16.5157	7.66971	8.51323	64.078	44.7517	2.54468	6.04287	8.14479e-11	1.2749e-09
C9orf91	1.72147	1.5188	12.6101	9.20472	5.33852	6.0736	45.7178	31.1561	2.54499	5.94775	8.15702e-11	1.2749e-09
PRKAG2	6.27774	5.59326	35.1928	29.6274	7.99458	7.74084	59.6679	46.603	2.54332	6.40317	8.16172e-11	1.2749e-09
ATG3	33.0435	35.7585	121.445	131.272	52.1376	52.1941	289.312	302.143	2.53483	8.60413	8.22802e-11	1.2833e-09
UBE2F	2.38118	2.66224	22.9755	23.8725	5.45687	5.03983	30.4632	32.2071	2.5612	5.17184	8.37204e-11	1.30377e-09
PRUNE	7.53066	6.87884	2.85073	2.28635	5.32388	5.15567	0.935722	0.820256	-2.69818	3.62042	8.44657e-11	1.31338e-09
PLCB3	3.12975	3.1659	0.945652	1.15214	2.94597	2.632	0.391265	0.458786	-2.6827	3.41453	8.7255e-11	1.3547e-09
CEP170	21.3581	14.1805	4.80662	2.47379	8.94545	9.69595	2.20519	1.51051	-2.56609	5.87237	9.1906e-11	1.42475e-09
THAP3	1.76859	1.89638	0.579207	0.917538	1.78786	1.46885	0.361785	0.178462	-3.32346	1.26	1.03627e-10	1.60403e-09
CREG1	16.212	16.9076	40.9284	35.5046	12.9407	14.6742	85.7402	74.5795	2.52685	6.23494	1.05669e-10	1.63317e-09
C14orf93	1.24216	1.23994	6.95473	6.86281	1.8518	1.63676	11.1208	11.2095	2.59764	3.66776	1.10381e-10	1.70342e-09
IFITM3	791.189	978.922	2914.05	4310.29	1159.57	967.417	5207.09	6623.39	2.51398	10.9043	1.10962e-10	1.70981e-09
PRKDC	10.0476	7.61631	2.54225	2.01571	4.90901	5.46592	0.951114	0.838178	-2.55007	5.8608	1.1409e-10	1.75538e-09
MPZL3	39.1613	33.9555	18.3919	14.1635	27.077	29.3819	5.3716	4.67366	-2.53442	6.42351	1.15462e-10	1.77382e-09
CSF1	2.485	2.58745	6.65246	7.21234	1.90373	1.98982	15.7316	11.1803	2.55401	4.71932	1.21976e-10	1.87108e-09
PSMD6-AS2	1.91607	1.57309	7.37009	6.41915	2.52559	2.35455	14.6139	14.9366	2.5641	4.04358	1.2301e-10	1.88322e-09
GAS8	0.0783754	0.153065	1.04162	1.04416	0.418772	0.303815	3.01244	2.83111	2.75685	1.88148	1.23134e-10	1.88322e-09
CAMK2G	64.3468	62.6851	21.2101	22.8164	84.3453	81.3301	11.6111	14.7924	-2.51144	7.4376	1.25263e-10	1.91292e-09
FAM199X	5.94757	4.55291	2.39034	1.41372	2.92841	3.13549	0.98335	0.476084	-2.62073	4.37774	1.31392e-10	2.00354e-09
KLHDC7B	0.207956	0.239156	1.82688	1.70112	0.740581	0.60979	5.14688	4.64666	2.6493	2.50182	1.45686e-10	2.21819e-09
CXorf21	20.8718	20.0512	63.1586	58.4131	25.4836	26.5384	134.047	144.108	2.4995	6.89104	1.49373e-10	2.27095e-09
STARD8	1.01192	0.96481	2.50195	2.51534	1.0369	1.19994	9.29122	6.14534	2.56714	3.93205	1.50115e-10	2.27885e-09
CCDC47	13.9607	11.4738	6.25872	4.49301	9.93506	10.1771	1.87511	1.68146	-2.56275	4.67974	1.57934e-10	2.394e-09
NAA50	23.0684	18.9525	7.45993	5.2723	9.64821	10.7055	1.93573	1.66912	-2.53114	5.92269	1.58861e-10	2.40451e-09
TCF20	21.882	17.9544	6.22222	5.80437	13.4648	16.6706	2.99069	2.35902	-2.51291	6.3193	1.64759e-10	2.4901e-09
PYGO2	6.99202	7.10197	1.97967	1.85693	6.28061	5.57648	1.2504	1.02891	-2.60967	3.67777	1.6722e-10	2.52357e-09
BRPF1	5.10234	5.10691	1.83377	2.26413	3.61976	4.54596	0.545049	0.587256	-2.6237	3.80751	1.90255e-10	2.86697e-09
SERPINB1	80.2594	86.0023	527.649	571.567	118.439	122.783	650.517	660.247	2.47886	9.94254	1.90588e-10	2.86777e-09
WRAP73	6.69091	6.71576	2.1259	1.8046	8.6622	7.82104	1.25322	1.38638	-2.64325	2.96209	1.91864e-10	2.88274e-09
LOC101928674	0.238755	0.249557	2.57345	3.30792	0.228981	0.599441	1.47059	2.7118	3.56395	0.373799	1.96546e-10	2.94445e-09
SNRNP27	4.05858	4.12203	15.789	15.597	5.81046	5.71932	34.0395	33.3495	2.5209	4.41366	1.98316e-10	2.96664e-09
GPR141	5.60022	3.45739	4.34843	3.0284	3.69848	3.33391	31.7072	22.155	2.58252	3.15162	2.0234e-10	3.02241e-09
SPRYD3	8.76903	9.65226	3.02184	3.73462	6.8999	6.06526	1.1939	1.14129	-2.5958	3.8959	2.11705e-10	3.15771e-09
HDAC4	2.44008	2.42432	10.0325	9.82799	3.87059	4.54118	25.7097	21.5193	2.47499	6.4948	2.24027e-10	3.33663e-09
ZNF496	0.2873	0.319926	3.40459	3.32374	1.26165	1.12286	7.8733	7.55023	2.58108	2.93418	2.28906e-10	3.40435e-09
LOC100506860	0.561048	0.495734	2.98653	2.84939	1.11234	0.973034	6.17876	7.58771	2.7697	1.43664	2.30887e-10	3.42885e-09
SESN3	3.72626	2.45933	0.618886	0.354968	2.29665	2.43538	0.429971	0.383217	-2.58319	3.91156	2.31254e-10	3.42932e-09
MIR223	88.093	100.152	46.6521	49.9685	99.2594	88.592	19.611	15.3334	-2.6943	2.81313	2.32323e-10	3.4402e-09
FUT11	2.68086	2.41221	0.764647	0.629664	1.31395	1.44423	0.322447	0.114851	-3.51444	1.42602	2.33074e-10	3.44633e-09
TGFBR2	95.7733	77.7854	39.0675	24.8765	50.7671	57.9097	16.2098	9.14893	-2.47221	7.77128	2.33424e-10	3.44654e-09
SOWAHD	7.99558	10.8717	2.89892	3.37987	21.1895	18.2159	3.04642	3.64683	-2.53857	3.82853	2.36929e-10	3.49325e-09
SLC51A	0.240514	0.28041	3.23318	3.18812	0.73665	0.541424	4.77163	5.00663	2.76443	1.71702	2.39392e-10	3.52449e-09
HIST1H4H	3.03706	2.04409	2.92701	3.33752	2.3235	2.82127	16.3186	16.2986	2.80994	1.20887	2.40906e-10	3.5417e-09
HAUS4	19.7009	19.7915	82.5077	87.423	26.3774	25.8134	145.994	145.701	2.46563	6.82408	2.52302e-10	3.70392e-09
TRIM21	38.9412	39.7092	196.737	229.976	65.9878	61.138	361.07	362.585	2.45804	8.35322	2.66101e-10	3.90092e-09
KIAA2013	39.3672	45.2183	16.3622	18.1681	40.7011	36.1113	7.19793	7.34489	-2.47024	6.21567	2.7153e-10	3.9748e-09
GSDMD	13.7633	15.9206	82.4443	110.699	33.8931	27.7861	151.267	185.747	2.45427	7.4908	2.8721e-10	4.19835e-09
MDM1	2.79039	2.09583	0.568671	0.509852	2.48506	2.34231	0.688874	0.359526	-2.78876	2.15165	2.89002e-10	4.21852e-09
MUSTN1	2.09715	2.29651	4.8243	4.12173	2.38086	2.75406	11.5198	14.8175	2.63753	2.03602	3.23806e-10	4.71983e-09
TGM1	0.349158	0.421373	0.385652	0.743685	0.578528	0.596603	2.62101	3.63112	2.64972	1.70218	3.41448e-10	4.96992e-09
KLF3	69.3217	50.7108	19.3027	12.066	31.2081	33.849	6.96811	5.71753	-2.44844	7.32986	3.46899e-10	5.04209e-09
C20orf197	2.0422	1.18424	0.426773	0.165327	0.648802	0.722652	0.113533	0.0371198	-4.12336	0.908706	3.50173e-10	5.08247e-09
TBC1D2	11.0495	11.3321	4.35317	4.76236	12.1543	12.4969	2.09751	2.15234	-2.49744	4.66338	3.51373e-10	5.09268e-09
TEX261	4.48947	4.17741	16.0743	15.3297	4.0862	3.85222	32.8484	22.4752	2.45948	5.44312	3.7255e-10	5.39197e-09
DAPK1	7.74065	6.08229	1.96698	1.71192	5.19538	5.20456	1.63876	0.914321	-2.50639	4.54004	3.81407e-10	5.51238e-09
ATF7IP	5.41466	3.87525	1.36416	0.808726	2.50071	2.66846	0.490523	0.431443	-2.535	4.31053	3.83871e-10	5.54017e-09
ARID4B	35.3795	34.0078	119.629	108.489	45.7208	47.2123	231.398	246.681	2.43172	9.36343	3.88388e-10	5.59749e-09
DNAJA1	74.8823	70.7053	301.906	320.088	130.949	134.03	655.439	705.682	2.43002	8.84612	4.00619e-10	5.75756e-09
CDC73	8.04459	6.79157	21.0086	15.8544	5.55181	5.62528	35.4027	29.996	2.43373	6.57358	4.1927e-10	6.01717e-09
CAMKK1	16.1563	16.9837	3.12775	4.07522	11.3944	11.0131	1.66214	2.03576	-2.48463	4.88622	4.22652e-10	6.05699e-09
C1QTNF3-AMACR	3.15562	2.38978	0.875058	0.684857	1.2667	1.40252	0.140108	0.158371	-2.99901	2.20202	4.23227e-10	6.05699e-09
PSMB9	55.8567	68.7389	302.53	406.817	222.737	185.503	923.521	1196.77	2.42574	8.78299	4.25928e-10	6.08715e-09
ST20-AS1	3.10509	3.83526	2.18896	2.96092	3.03603	2.66341	0.377123	0.429004	-2.8227	2.29027	4.27818e-10	6.10564e-09
GNPDA1	5.74515	5.1868	2.33748	1.84163	8.22134	7.74926	1.97474	1.41366	-2.53983	3.31377	4.86213e-10	6.92187e-09
WIZ	2.33579	2.21846	0.79821	1.05903	2.27896	2.18171	0.557851	0.35713	-2.6736	2.62979	4.86361e-10	6.92187e-09
RMND5A	43.452	33.491	11.4381	8.30168	26.1014	27.2447	6.91187	4.85578	-2.42634	6.96693	4.87879e-10	6.93384e-09
LMNB1	24.7076	26.8007	182.274	169.075	28.4376	29.4213	181.63	151.829	2.41658	8.4002	5.00266e-10	7.10003e-09
TMEM110-MUSTN1	2.17698	2.56296	4.70546	4.1873	2.33972	2.05187	11.8748	13.3627	2.51369	2.98316	5.06061e-10	7.17235e-09
HIC1	4.66842	5.59618	0.91091	0.796501	1.50768	1.35587	0.17803	0.196888	-2.93625	2.59951	5.07114e-10	7.17734e-09
PCGF5	3.08643	2.64011	11.3531	7.31506	5.08374	5.11537	38.4278	27.2044	2.41987	6.49609	5.09557e-10	7.20197e-09
LOC102724552	4.31535	3.38655	16.6675	17.2495	7.31009	6.04742	33.5536	40.7628	2.47922	3.48948	5.38568e-10	7.60153e-09
GDPD3	12.184	13.5825	5.51718	7.98221	27.7454	23.9735	4.20758	4.9651	-2.48229	3.78581	5.48965e-10	7.73762e-09
ATG16L1	5.49578	5.18498	1.80003	1.64425	2.84379	3.27918	0.592447	0.451706	-2.65411	3.18816	5.51162e-10	7.75791e-09
PPM1M	45.8926	50.2635	23.1646	25.9478	48.9745	46.4463	8.90494	9.13329	-2.42281	6.1518	5.5678e-10	7.82623e-09
ANKZF1	18.4198	17.1413	4.0708	4.4913	19.9205	19.084	2.86564	3.64097	-2.45182	4.85531	5.6852e-10	7.97132e-09
MICAL2	24.9724	20.6121	10.2648	9.6023	12.3481	13.9173	2.58518	2.28443	-2.43436	6.3228	5.68952e-10	7.97132e-09
ADSS	20.444	16.4782	5.12245	3.98737	13.9863	14.1233	4.03468	2.52946	-2.46706	4.81331	5.69436e-10	7.97132e-09
IL18RAP	14.4639	15.7271	62.1205	55.4324	13.6355	14.3724	81.7569	72.5667	2.41193	6.78427	5.73871e-10	8.02245e-09
CARS2	8.58335	9.20314	18.1133	20.6077	9.89231	9.56064	45.9302	53.0181	2.42209	5.38388	5.87584e-10	8.20296e-09
GMNN	0.49092	0.506361	1.05144	1.93629	1.07881	1.18892	5.34712	6.76612	2.64861	1.54782	5.9803e-10	8.33744e-09
RASSF1	13.5504	15.2528	3.88842	4.4798	17.1337	14.5907	2.37017	3.09583	-2.46838	4.19204	6.02891e-10	8.39378e-09
ZNF398	11.8916	9.58266	3.07044	2.52932	6.79606	7.17248	1.41702	1.2317	-2.464	4.9091	6.05911e-10	8.42438e-09
RBM14	3.7013	3.60848	1.66058	1.38297	3.17543	2.8717	0.875138	0.550158	-2.52891	3.59647	6.3892e-10	8.87129e-09
DPRXP4	1.8217	1.26052	4.25301	4.70269	1.61177	1.68722	9.00934	10.4329	2.69407	1.54023	6.49078e-10	9.00014e-09
NAA25	0.122474	0.0975774	1.11859	0.677827	0.0954663	0.132507	1.04883	0.719784	2.9138	1.55317	6.62458e-10	9.17326e-09
MVP	61.3341	70.9126	281.468	365.52	108.633	96.6245	475.944	570.849	2.39364	9.53665	6.836e-10	9.4405e-09
RGS18	114.725	92.9567	52.9867	32.9089	82.777	90.3054	23.6028	15.6828	-2.40003	7.08432	7.09071e-10	9.77907e-09
DRAM2	2.68581	2.23037	9.33139	7.59276	2.5726	2.73036	14.6468	14.1985	2.46437	3.72425	7.26877e-10	1.00112e-08
EPAS1	0.585575	0.385941	1.35651	1.21027	0.271726	0.340115	2.36778	1.66424	2.61437	2.40645	7.46476e-10	1.02673e-08
HCAR3	59.6922	66.6252	225.516	223.037	94.0885	95.6404	503.333	491.258	2.38439	8.87633	7.89644e-10	1.08465e-08
SPATA13	5.53526	4.18182	25.4203	18.3468	2.84164	2.95192	21.7147	14.9179	2.39224	6.71924	8.07843e-10	1.10816e-08
DNAJC13	3.11237	2.48429	6.82208	4.74177	1.61288	1.73634	10.8578	8.56979	2.40959	5.2363	8.27655e-10	1.13382e-08
MID1IP1	41.3067	47.5635	15.3989	17.8282	86.588	79.9974	15.3804	16.5989	-2.38307	7.24489	8.52673e-10	1.16653e-08
DDAH2	21.2875	26.6621	47.2209	72.9325	39.183	34.0965	144.899	203.842	2.37915	7.31739	8.7674e-10	1.19786e-08
MAP3K5	5.67064	4.77797	10.473	7.83216	4.29177	4.86109	27.528	22.3814	2.38264	5.83396	9.48688e-10	1.29444e-08
GBP2	99.2457	95.865	403.065	403.059	234.824	245.884	1120.01	1214.15	2.3703	10.9447	9.57066e-10	1.30413e-08
FAM117A	6.56243	7.37357	28.8577	30.6941	15.1915	15.5587	82.7956	78.9264	2.37723	6.29472	9.61163e-10	1.30797e-08
HLX	11.5851	13.9451	84.388	105.056	34.9131	33.7101	173.712	180.816	2.37268	7.50558	9.67484e-10	1.31483e-08
EPOR	5.53302	6.18611	1.0863	1.27598	7.06559	6.16132	0.905635	1.26191	-2.4851	3.317	1.00727e-09	1.36709e-08
NFATC3	10.8402	8.48654	2.26956	2.24084	12.1253	12.8118	2.4006	2.30569	-2.39473	5.42875	1.02639e-09	1.3897e-08
TSC1	2.94197	2.41004	1.05589	0.969821	1.56472	1.65086	0.403032	0.270507	-2.53201	3.60698	1.02665e-09	1.3897e-08
ZNF507	1.0088	0.702704	0.326449	0.251706	0.447075	0.450676	0.177976	0.0516518	-3.11263	1.74244	1.02982e-09	1.39216e-08
SMCO4	1.84704	2.58704	9.30642	12.299	7.73754	6.37846	33.384	41.2091	2.41297	3.80719	1.0522e-09	1.42054e-08
CCM2	53.0748	60.9397	21.8802	26.152	93.0362	86.4615	15.6193	17.9704	-2.37216	6.47347	1.06836e-09	1.44046e-08
DDX42	13.9575	12.8635	7.54332	7.01755	9.33298	9.54166	1.85651	1.74206	-2.42149	5.00287	1.0705e-09	1.44145e-08
MAP3K2	42.7288	30.9494	12.8001	8.28278	34.4331	37.0053	8.19503	6.686	-2.36458	7.94306	1.10812e-09	1.49014e-08
GTF3C2	5.14796	5.43267	2.5565	2.62203	2.72133	2.88435	0.799567	0.457434	-2.57247	3.49079	1.15374e-09	1.54946e-08
FAM159A	3.38119	4.24772	2.38487	2.46131	10.5176	10.059	1.92784	1.63573	-2.68446	1.69544	1.15814e-09	1.55334e-08
SEC61A1	14.8234	14.6668	32.2187	30.205	8.22642	7.8508	48.8597	42.3872	2.36528	6.50103	1.1714e-09	1.56907e-08
RPS2	56.3661	73.5768	190.509	257.369	95.8998	81.1649	393.314	490.375	2.35428	7.59216	1.26037e-09	1.68603e-08
MAP2K3	143.901	160.953	97.4178	105.014	164.135	162.97	38.2123	32.0906	-2.35466	8.03442	1.27983e-09	1.70984e-08
KIAA0226L	25.1724	24.9972	13.6318	11.4987	8.4951	8.98421	1.89957	1.59422	-2.41372	5.583	1.31606e-09	1.75366e-08
IFNGR2	197.949	214.464	137.748	138.678	233.945	221.516	44.4426	45.916	-2.3491	8.4213	1.36445e-09	1.81578e-08
ERLIN1	1.64873	1.46981	6.12565	4.52033	0.955094	1.17665	6.00627	5.21537	2.44894	3.54562	1.37707e-09	1.8302e-08
RNF217	0.0906052	0.0664491	0.36871	0.256278	0.213087	0.156615	1.51935	1.33005	2.64162	1.33709	1.39891e-09	1.85682e-08
C4orf32	1.15961	0.91628	5.03603	3.21514	1.65135	1.9258	11.4989	8.82383	2.41768	3.5455	1.4561e-09	1.93022e-08
PANK2	17.6271	16.5694	58.817	59.3487	29.3021	28.8943	149.932	148.869	2.34497	7.18172	1.46707e-09	1.94226e-08
ZMIZ1	91.7029	75.3909	47.3061	39.7086	71.7205	104.063	26.004	14.1474	-2.34184	8.79423	1.51393e-09	2.00171e-08
LPCAT2	17.0973	13.466	59.8841	34.8298	14.3845	15.4651	97.5962	72.9352	2.34209	7.77707	1.51758e-09	2.00395e-08
EDRF1	3.11001	2.28925	1.18612	0.871514	1.5272	1.52666	0.442942	0.242669	-2.65351	2.76068	1.56533e-09	2.06434e-08
TMC8	25.5218	26.6893	7.5992	8.71297	26.8023	25.3495	5.32656	5.25829	-2.34968	6.18099	1.58499e-09	2.08758e-08
RAB29	5.19465	5.51845	26.8846	25.1225	9.34977	9.73357	46.1578	47.4628	2.34378	6.22985	1.59157e-09	2.09355e-08
FLNA	185.508	196.021	61.3495	69.115	244.343	258.696	49.1803	48.3959	-2.33595	10.2089	1.59604e-09	2.09675e-08
TYMP	138.231	166.825	586.195	741.314	272.972	232.103	1189.19	1377.18	2.33489	10.0818	1.61483e-09	2.11872e-08
CXCR4	951.735	966.056	527.74	468.182	1529.08	1526.64	330.717	303.277	-2.33396	10.6112	1.63769e-09	2.14596e-08
NCOA4	179.841	141.47	51.9293	32.1455	73.6305	82.4179	20.0726	14.559	-2.33839	8.12187	1.66247e-09	2.17564e-08
TIFA	2.48938	2.24491	20.2241	15.4272	7.45938	7.72295	46.9467	37.8688	2.34386	5.7532	1.66856e-09	2.18084e-08
MAD2L2	2.00932	3.29932	14.9471	20.1961	5.0921	3.67217	22.0357	26.7284	2.39198	3.8203	1.67256e-09	2.18327e-08
NDC80	0.592541	0.41989	1.47707	1.59968	1.15567	1.19365	5.72185	6.37598	2.46378	2.33533	1.75569e-09	2.28888e-08
DCUN1D3	3.88464	3.24976	11.0133	10.9893	3.60771	4.20199	24.4344	18.5609	2.36307	4.84174	1.7836e-09	2.3223e-08
PARP11	1.13147	0.839457	3.63268	2.58216	0.995931	1.14468	6.76197	5.27299	2.40442	3.67281	1.78777e-09	2.32478e-08
MAML1	40.1628	36.213	20.6729	18.3443	24.246	29.0841	6.91486	4.79595	-2.33784	7.01264	1.82576e-09	2.36873e-08
KIF21B	17.4434	17.6604	4.51316	4.78172	9.70974	12.0934	2.50597	1.90656	-2.34844	6.456	1.82619e-09	2.36873e-08
TMEM129	8.45002	9.97115	4.11912	4.93958	7.86541	6.76317	1.2832	1.46763	-2.42195	3.99615	1.88369e-09	2.43715e-08
CASS4	56.5286	50.2548	26.9974	19.0568	27.4135	34.1701	9.2265	5.38479	-2.34791	6.50877	1.89081e-09	2.44327e-08
PLAC8	2.76685	2.44818	6.96659	7.58953	3.10493	3.40927	15.1669	16.4168	2.40246	3.37519	1.96071e-09	2.5304e-08
SAP30	0.901568	1.14382	0.344714	0.628284	3.21115	2.6241	0.607739	0.404137	-2.9893	0.497249	1.96873e-09	2.53756e-08
ARHGEF18	21.8509	22.4513	6.52354	7.68497	23.3831	24.155	4.59721	4.64285	-2.33237	6.37127	1.98742e-09	2.55843e-08
SLC25A30	0.688686	0.379104	1.75041	1.27446	0.53439	0.730641	3.46933	2.99906	2.48836	2.49412	2.0555e-09	2.63944e-08
PHF19	2.05142	2.15014	0.570831	0.786287	1.13555	1.27465	0.300691	0.162249	-2.80656	2.19291	2.07799e-09	2.66497e-08
IGLL5	7.1448	11.6328	14.7937	17.9171	1.3965	0.223339	2.62088	0.0724401	-4.26336	2.89115	2.08398e-09	2.66932e-08
NREP	0.217485	0.129063	0.980172	0.719063	0.0970515	0.0590382	1.65293	0.979332	3.33317	0.492126	2.13534e-09	2.72998e-08
ZNF182	4.23199	3.46611	1.22622	1.04341	3.04491	3.52935	0.5675	0.529857	-2.52253	2.99948	2.13667e-09	2.72998e-08
KIAA0753	1.63285	1.5722	0.375587	0.462612	1.90546	1.83751	0.412663	0.323007	-2.56025	2.3333	2.23703e-09	2.85466e-08
CSF1R	9.17339	7.38738	3.97135	3.82027	2.57999	2.76558	0.681103	0.44767	-2.52665	3.9469	2.32415e-09	2.96213e-08
C5AR1	701.63	756.449	415.491	395.239	592.461	611.879	150.34	119.882	-2.3051	10.0973	2.51263e-09	3.19441e-08
XPO7	5.52633	4.33571	1.64613	1.28988	3.0453	3.16202	0.806147	0.555673	-2.45414	3.63592	2.5271e-09	3.20882e-08
HDAC5	30.1768	33.459	12.5806	15.2374	46.1183	45.0998	9.20458	9.30014	-2.31001	7.06615	2.53285e-09	3.21215e-08
MICA	2.85406	2.84871	11.7906	12.4255	9.93001	9.42801	50.5406	49.4201	2.31521	5.39948	2.54045e-09	3.2178e-08
NXT2	0.866578	0.736797	2.53706	1.70668	0.600522	0.729596	5.32699	3.41517	2.50744	2.43306	2.57206e-09	3.25381e-08
MED12L	0.108799	0.0861791	0.471073	0.246727	0.228068	0.275546	1.82839	1.23634	2.43838	2.5505	2.78685e-09	3.52119e-08
NFIL3	39.1217	38.1541	149.093	130.68	36.458	38.8245	209.754	179.448	2.29926	7.83804	2.82179e-09	3.56095e-08
ATP6V0A1	25.6862	25.1678	6.46613	6.54747	32.9363	30.6887	6.59332	6.66084	-2.30589	6.1886	2.89969e-09	3.65475e-08
ARID5A	31.1603	40.3456	142.107	188.229	65.0159	60.3093	266.002	318.797	2.29377	8.26041	2.99101e-09	3.76521e-08
ZER1	25.1573	26.1793	12.1228	12.912	23.5884	24.5778	5.79557	4.76662	-2.30702	6.1825	3.02553e-09	3.804e-08
DKFZP586I1420	3.17776	2.78633	9.09313	9.47279	4.7434	4.94428	22.4707	23.6697	2.31902	4.78602	3.03355e-09	3.80941e-08
ST3GAL4-AS1	9.93153	11.1026	50.9396	66.0298	12.0918	11.3589	47.6007	60.7088	2.32784	4.66551	3.13568e-09	3.93284e-08
TRIM23	9.00295	7.31326	4.34207	2.36252	4.36935	4.57268	1.06978	0.819906	-2.41378	4.049	3.15955e-09	3.95793e-08
GIMAP7	0.616777	1.25219	3.2867	4.67179	0.512023	0.749767	2.25622	3.40799	2.73404	1.37744	3.20479e-09	4.00971e-08
PRKX	1.57038	1.7057	2.83802	2.95798	1.96436	2.09069	9.48985	9.78778	2.31689	4.62415	3.22586e-09	4.03114e-08
JADE1	8.52464	7.57228	3.31049	2.78493	5.06892	5.69762	0.988676	0.988663	-2.35807	4.68775	3.26993e-09	4.08124e-08
GCNT1	0.291331	0.239086	0.61653	0.506389	0.259667	0.344467	1.61656	1.45987	2.49087	2.00001	3.31236e-09	4.12917e-08
NFE2L1	12.894	13.4056	10.0567	11.2269	11.6037	11.8158	2.6015	2.32296	-2.32051	5.53307	3.36041e-09	4.18397e-08
LINC00862	1.22824	0.973274	0.621721	0.376409	2.13579	1.71171	0.51514	0.263852	-3.01592	0.516129	3.38028e-09	4.20361e-08
ATXN7	8.14396	5.52997	30.8602	20.586	6.19448	6.79131	46.4271	30.2691	2.28879	7.12744	3.4134e-09	4.23966e-08
ZNF552	7.42934	6.27807	3.32277	2.71037	4.60304	4.6407	0.798195	0.822438	-2.48442	3.17749	3.42855e-09	4.25331e-08
LOC100133091	1.0756	1.32352	0.65511	0.540758	1.25031	0.865684	0.323857	0.157639	-2.98666	1.0879	3.48466e-09	4.31769e-08
C17orf75	3.03117	2.76056	6.04742	6.56507	4.92925	4.9742	18.7714	24.1595	2.29314	5.35147	3.49164e-09	4.32111e-08
VAMP1	19.2977	17.8216	6.53117	6.57181	29.4271	27.0723	6.33073	6.00884	-2.29197	5.64537	3.77034e-09	4.66039e-08
FYCO1	0.752589	0.512596	3.33458	2.90882	0.286024	0.374997	2.0044	1.52403	2.41353	3.64121	3.98487e-09	4.91963e-08
GIT2	35.0543	30.2962	12.4042	10.269	26.3689	27.7567	6.43791	5.425	-2.28113	6.75839	4.07489e-09	5.02472e-08
ALAS1	14.8681	14.5247	7.61323	7.74763	17.7561	17.8574	3.50484	3.56691	-2.31553	4.74669	4.09406e-09	5.04229e-08
TGM3	11.5408	13.5841	3.62017	4.67021	9.1001	8.55325	1.48534	1.77741	-2.35603	4.18842	4.12547e-09	5.07487e-08
TOP1P1	2.20362	2.10122	7.35291	6.07199	2.84774	2.84239	17.3406	14.1755	2.31546	4.06134	4.38492e-09	5.38756e-08
KLF2	60.9329	76.636	37.1127	40.8505	38.7703	38.9273	8.13059	7.88748	-2.29729	5.99533	4.41039e-09	5.41072e-08
IGFBP4	0.109191	0.171471	0.925017	1.26159	0.0340297	0.045886	0.489161	0.59924	4.13273	0.0551099	4.41433e-09	5.41072e-08
IER5L	3.40842	4.25119	2.35805	2.71409	4.0562	3.04716	0.434583	0.741212	-2.45199	2.8409	4.43704e-09	5.43206e-08
UBE2F-SCLY	0.763591	0.799075	5.48214	5.73231	1.64496	1.53586	7.90111	8.31849	2.3382	3.58136	4.52954e-09	5.53869e-08
TBC1D10A	2.92204	3.46118	0.754288	1.30679	4.93542	4.95332	0.639079	0.884913	-2.47936	2.33849	4.58032e-09	5.58753e-08
PPP1CA	56.7157	67.8616	18.914	25.2095	93.3157	80.7236	14.1153	19.2999	-2.27351	6.14401	4.58039e-09	5.58753e-08
RGS2	542.775	596.869	185.335	191.63	600.953	580.434	112.109	125.117	-2.26398	8.95236	4.59231e-09	5.59542e-08
BLOC1S4	2.60193	3.30928	1.18426	1.46796	2.8879	2.82279	0.671276	0.434098	-2.73336	1.59468	4.61877e-09	5.62096e-08
CSTF1	2.90924	2.60986	1.19705	0.783521	2.31884	2.55484	0.398558	0.36354	-2.67277	1.94999	4.97716e-09	6.04993e-08
LYSMD3	11.1443	7.42819	5.83701	2.64711	4.43729	5.1709	1.64288	0.861093	-2.36534	4.38581	5.0461e-09	6.12646e-08
ARRB1	14.242	14.0892	4.01605	4.64349	14.7039	15.2721	3.15527	3.05948	-2.26482	6.10556	5.40703e-09	6.54916e-08
RRN3P3	1.18966	1.05165	2.31657	2.60728	1.68062	1.56344	7.96308	8.47951	2.3349	3.06699	5.49682e-09	6.65005e-08
LOC101929709	0.473466	0.339299	1.54406	1.44304	0.68099	0.82607	4.23161	3.96214	2.54024	1.44187	5.52692e-09	6.67858e-08
LRRC25	182.102	210.314	100.87	118.256	209.949	200.302	45.0245	44.1289	-2.25024	8.38261	5.68031e-09	6.84778e-08
LINC01176	3.1317	2.71972	7.40973	8.05882	6.39907	6.71122	28.6932	32.0481	2.32422	3.09098	5.7823e-09	6.96254e-08
GCLM	3.25665	3.22338	15.4432	11.786	5.69664	6.00004	33.4666	27.1295	2.25167	6.06454	6.09555e-09	7.33112e-08
FLVCR2	0.0585453	0.199127	1.53439	1.30862	0.22268	0.137842	1.51709	1.36318	2.61347	1.54221	6.15869e-09	7.39837e-08
USP22	28.3865	26.2228	11.6784	11.3553	14.2116	15.156	4.09104	2.95194	-2.26731	6.21859	6.20537e-09	7.44571e-08
CDK5RAP2	1.64112	1.47215	4.17306	4.26709	1.41879	1.38694	5.69467	6.87658	2.27699	4.44137	6.53865e-09	7.83644e-08
PNMA6A	0.651219	0.53526	0.0635713	0.0727519	1.19093	1.1968	0.0624493	0.142379	-3.06307	0.218964	6.62206e-09	7.92713e-08
B3GNT8	45.8505	59.1695	21.3915	26.1041	62.9358	54.0059	10.3054	13.2585	-2.24695	6.102	6.87049e-09	8.21493e-08
GRAMD1C	8.70076	6.51801	2.57676	1.97737	3.69245	3.38646	0.737274	0.711903	-2.37469	3.73953	6.89008e-09	8.22083e-08
TRANK1	25.5266	21.5854	91.6457	86.8845	38.3919	39.2237	234.449	180.637	2.23422	9.87867	6.89148e-09	8.22083e-08
PHOSPHO1	205.32	240.749	57.1233	74.5183	268.618	241.844	48.2962	57.0297	-2.23577	8.34089	6.93423e-09	8.26222e-08
SNX16	3.61293	2.59369	2.00022	1.13537	1.14247	0.933925	0.494631	0.16552	-2.78642	2.3967	7.1608e-09	8.52226e-08
PPP1R12B	20.2856	15.1305	4.59444	4.01599	14.2482	13.5734	3.00333	3.0195	-2.23839	6.75722	7.39264e-09	8.78798e-08
NDST1	36.9245	36.7579	12.0336	12.7739	28.0339	34.0621	8.41334	5.95367	-2.23531	7.45663	7.40966e-09	8.798e-08
RASSF2	330.124	280.015	133.634	113.642	228.656	260.922	58.7306	48.7822	-2.22875	9.94627	7.50699e-09	8.90325e-08
SEC24D	9.3225	6.97448	30.9777	17.8262	6.90803	7.74552	60.5932	32.5494	2.23627	6.45655	7.6116e-09	9.01689e-08
ABCB6	1.29781	1.26753	0.378462	0.359455	1.97426	2.08278	0.269685	0.329067	-2.58448	1.60924	8.00194e-09	9.46834e-08
BCL2L13	2.46836	2.25446	3.16551	2.51174	1.34785	1.4886	8.80725	6.51145	2.27227	4.19675	8.01458e-09	9.47236e-08
GPR162	8.21256	9.23521	2.97405	3.88127	44.1283	37.6947	7.77589	9.36343	-2.23658	5.27835	8.03922e-09	9.48153e-08
ARHGAP17	2.95966	2.48446	4.5552	4.62224	2.62813	2.95815	16.8446	12.5938	2.26057	4.44574	8.04084e-09	9.48153e-08
CRKL	28.3915	24.4938	15.2923	11.4305	15.642	16.8782	4.65679	3.30307	-2.24353	6.3216	8.30623e-09	9.78321e-08
SESN2	9.75518	11.1367	6.53652	6.97095	10.2396	11.1701	2.18206	2.12098	-2.27132	4.73097	8.5512e-09	1.00602e-07
CNPPD1	30.8626	34.9652	12.8365	16.3683	39.5919	35.1	8.78536	8.3851	-2.23928	5.59991	8.89818e-09	1.04564e-07
APOBEC3D	1.86071	1.67075	4.1944	3.96671	2.4615	3.07883	13.116	11.8861	2.2716	3.72577	9.06755e-09	1.06432e-07
MX2	105.184	95.6699	561.986	545.622	143.949	146.058	805.529	666.894	2.2119	10.1505	9.44499e-09	1.10735e-07
PAIP1	1.06069	1.0256	4.64832	4.10036	1.37968	1.24448	7.85077	6.78926	2.29883	3.29767	9.58468e-09	1.12245e-07
COQ4	0.375487	0.430481	0.965833	0.675387	0.270585	0.213554	2.39871	1.91894	2.82525	0.530693	9.60856e-09	1.12396e-07
ABHD8	2.90093	3.60662	1.03508	1.29109	4.01546	3.81517	0.536722	0.735913	-2.44772	2.24343	9.63317e-09	1.12555e-07
OSBPL11	23.0067	17.467	9.78508	5.75179	11.3234	12.9359	3.6088	2.38776	-2.24555	5.64565	9.66875e-09	1.12842e-07
SIAH1	17.0237	15.75	9.67724	7.56912	16.2275	15.7166	4.20525	3.38954	-2.25923	4.74006	9.69981e-09	1.13076e-07
KDSR	1.50659	1.48325	11.3898	9.25791	2.33111	1.98409	10.3806	10.9986	2.23821	5.00319	9.92265e-09	1.15501e-07
VPS37C	27.0619	30.1165	15.8882	17.254	34.2702	33.3741	8.33828	7.33426	-2.22421	5.86975	9.9395e-09	1.15501e-07
NLRC5	12.0167	11.7429	92.5982	102.804	37.48	37.3775	204.41	173.256	2.20871	9.14099	9.94162e-09	1.15501e-07
MFSD7	0.66068	0.722166	1.9401	2.44514	3.10752	2.06356	13.961	14.9141	2.26279	3.40826	9.98592e-09	1.15884e-07
DEGS1	18.1625	18.3004	79.0357	68.2348	24.7421	24.6188	124.749	114.557	2.21102	6.92881	1.0224e-08	1.18513e-07
TRIM6	0.767382	0.545435	10.995	9.19471	1.00061	1.19436	6.37287	4.92575	2.29936	3.90905	1.06865e-08	1.23734e-07
CENPN	0.993114	0.969317	2.28625	2.45022	1.28301	1.51188	5.33967	6.16094	2.26356	3.60947	1.07254e-08	1.24045e-07
NSUN5	4.38622	5.23056	1.34989	1.86228	4.66547	3.44296	0.96163	0.901856	-2.37089	2.81224	1.07894e-08	1.24644e-07
SCO2	29.9708	38.5416	138.712	166.003	78.5852	65.1785	308.774	361.485	2.2016	7.28532	1.13391e-08	1.30846e-07
MUTYH	0.541544	0.466171	0.530291	1.31346	0.631783	0.659277	3.24926	3.47924	2.46097	1.40051	1.14107e-08	1.31434e-07
LOC100129697	2.42046	2.49626	1.0353	1.36139	3.17706	2.79387	0.807731	0.524798	-2.5974	1.53607	1.14157e-08	1.31434e-07
PRR12	2.20329	2.37463	0.595469	0.659288	2.4145	2.63354	0.431625	0.485528	-2.31399	3.36305	1.15279e-08	1.32578e-07
PRKAR2A	7.10399	5.96928	2.47444	1.97395	2.54116	2.73124	0.64743	0.437909	-2.53643	2.83978	1.15513e-08	1.32697e-07
KIAA0368	2.50939	2.04441	5.47846	4.57657	1.96377	2.00813	9.54966	9.15953	2.22162	5.10728	1.15904e-08	1.32998e-07
ADGRE3	206.485	181.765	75.2609	60.5329	107.457	108.498	28.7833	23.3498	-2.20227	7.9067	1.16328e-08	1.33334e-07
ZBTB2	8.51733	7.42796	4.18064	2.64508	8.12912	8.26373	3.19264	1.68818	-2.26757	4.16236	1.16862e-08	1.33797e-07
DNMBP	5.94903	4.71198	2.72387	2.14494	4.10316	5.02425	1.28157	0.851825	-2.26804	4.42493	1.17652e-08	1.34552e-07
FBXO33	12.2405	11.2882	5.5533	4.5225	10.2355	10.448	2.55496	2.17965	-2.23138	5.24931	1.17901e-08	1.34686e-07
C4orf3	11.9284	12.4348	53.7689	55.223	29.4106	27.1118	125.67	134.87	2.19716	7.38085	1.20398e-08	1.37313e-07
MIR320E	7.17312	10.4813	19.3106	33.5711	12.9169	7.29615	51.7906	79.4942	2.62104	0.574484	1.20469e-08	1.37313e-07
ERN1	34.4244	22.1707	6.92018	5.29924	9.00626	11.5713	2.99128	1.89929	-2.24542	5.56237	1.23218e-08	1.4029e-07
LTB4R	17.1673	19.7848	5.5988	6.73771	11.9388	11.9666	2.42672	2.54412	-2.23039	5.39924	1.23539e-08	1.405e-07
MCCC1	0.385692	0.359768	0.565241	0.493201	0.363948	0.37531	2.28144	2.02779	2.47776	1.34423	1.26865e-08	1.43963e-07
GTPBP2	14.7599	15.962	68.2838	76.549	23.8028	23.3118	126.305	108.903	2.19383	7.43636	1.27326e-08	1.44314e-07
CHIAP2	0.265039	0.198184	0.56846	0.64206	0.421856	0.3824	1.149	2.30726	2.45105	1.06912	1.27456e-08	1.44314e-07
MEF2D	42.6976	43.1147	20.5059	23.0322	38.7096	42.9755	10.236	8.44736	-2.19611	7.42548	1.28067e-08	1.44846e-07
COA1	14.7078	12.0354	5.67453	5.61132	19.2936	19.1638	4.60224	4.13854	-2.2209	5.02268	1.29413e-08	1.46054e-07
PARP9	8.56723	7.20325	118.174	91.2967	24.703	24.6977	141.195	112.759	2.19048	8.81181	1.2942e-08	1.46054e-07
FMNL3	2.74423	2.4133	0.940166	0.814125	4.39756	4.85896	1.25795	0.938591	-2.2281	4.68583	1.30668e-08	1.473e-07
C19orf52	2.93564	3.59442	0.920259	0.967302	2.94724	2.33601	0.422655	0.462999	-2.6697	1.37634	1.32665e-08	1.49386e-07
CHCHD7	1.35547	1.49354	7.09805	8.15937	1.8453	1.99127	7.02197	9.03587	2.2917	3.04224	1.33674e-08	1.50311e-07
LOC100049716	12.9686	12.2465	5.86162	5.63566	11.4528	10.6583	2.52663	2.39534	-2.25733	4.22324	1.33779e-08	1.50311e-07
SELL	291.507	268.259	837.172	724.471	300.931	311.202	1624.57	1369.9	2.18657	10.7719	1.34304e-08	1.50735e-07
NDUFC2-KCTD14	0.584164	0.803322	1.19027	1.77846	0.545968	0.309667	2.27563	2.9294	2.42344	1.67495	1.36956e-08	1.53469e-07
DOK3	207.71	207.979	146.949	154.773	190.137	204.833	49.6197	41.7224	-2.18815	8.4569	1.37039e-08	1.53469e-07
ST3GAL6	16.5238	14.297	4.69556	3.80416	19.7053	20.6572	5.08677	4.25265	-2.21213	5.31415	1.37334e-08	1.53631e-07
MFSD5	5.90877	7.64573	2.90112	3.06633	5.51763	5.41864	1.27758	1.08232	-2.34976	3.07272	1.39807e-08	1.56227e-07
PLSCR1	12.9059	12.4663	111.903	90.5438	33.8847	34.9817	197.647	154.28	2.18684	7.48537	1.40146e-08	1.56329e-07
MIR922	5.25329	3.67112	12.3422	6.58483	4.12647	2.29825	66.0191	31.5261	2.93241	0.426753	1.40203e-08	1.56329e-07
NOMO3	6.03413	5.59441	1.57415	1.43442	4.87531	5.06122	1.34924	1.01061	-2.27018	3.86597	1.4435e-08	1.60778e-07
GPSM2	1.06217	0.762738	0.165191	0.108515	1.05863	1.17437	0.203762	0.147771	-2.8399	0.867821	1.4584e-08	1.62261e-07
SOCS3	0.911983	2.75854	15.2539	19.3359	2.5138	2.71181	13.8044	11.8111	2.23214	4.56441	1.47005e-08	1.6338e-07
PRPF40A	9.49056	8.18628	18.735	15.6307	7.99535	8.73121	34.2163	36.2764	2.18179	7.03414	1.52275e-08	1.69053e-07
CBX7	20.8096	22.3399	15.9739	19.2343	26.4079	25.5866	6.61905	5.78353	-2.19093	6.14453	1.53533e-08	1.70266e-07
P2RX7	0.604682	0.611617	1.69205	1.91066	0.699816	0.638571	2.71812	3.45301	2.30267	2.59317	1.57231e-08	1.74178e-07
ADAP2	0.429685	0.425665	0.968359	1.05588	0.188665	0.152826	1.30392	1.21726	2.68901	0.996447	1.58413e-08	1.75234e-07
MICB	16.6375	15.2752	47.2683	43.7214	18.8737	20.5858	108.766	85.536	2.18015	6.80689	1.58526e-08	1.75234e-07
TAP1	129.276	145.708	713.084	783.427	303.154	292.197	1470.92	1368.16	2.17412	10.9076	1.59679e-08	1.76318e-07
APOBEC3B	31.7227	32.9076	116.653	120.145	34.0991	34.9131	166.913	154.354	2.17843	7.05528	1.6111e-08	1.77707e-07
C12orf43	0.592893	0.63561	1.61611	1.91382	0.769145	0.780461	2.89106	3.86449	2.32879	2.20312	1.61645e-08	1.78106e-07
INAFM2	23.1544	22.946	19.0433	17.9607	27.3205	27.3989	7.22869	5.95121	-2.19871	5.65113	1.62248e-08	1.78577e-07
ANKRD65	0.290652	0.292682	1.31193	1.12851	0.960054	0.923549	6.18033	4.8149	2.32615	2.1271	1.64366e-08	1.80714e-07
RNF166	161.275	174.604	61.0293	74.4095	237.069	220.368	48.4749	52.6417	-2.17102	8.30712	1.72001e-08	1.88906e-07
NARF	26.5756	29.8938	128.976	156.624	38.6839	34.3167	145.277	174.378	2.17241	7.3523	1.72185e-08	1.88906e-07
CXCL2	1.1829	1.3099	0.870498	0.884796	1.88728	1.83562	0.257832	0.207839	-3.18118	0.393837	1.73783e-08	1.90455e-07
PSMB8	53.8877	66.1716	237.773	309.763	140.377	122.281	504.729	630.387	2.16693	8.6749	1.78814e-08	1.9576e-07
CDKN1A	3.40176	4.11281	15.0344	16.6341	7.25395	6.96472	34.017	33.0131	2.18618	5.12124	1.80298e-08	1.97173e-07
FAM134A	32.4685	33.189	15.2813	15.0511	32.0559	30.4064	8.51016	7.10289	-2.1741	6.65018	1.8288e-08	1.99784e-07
THOC7	3.35329	4.26844	15.0912	15.486	7.30675	7.88177	32.4759	33.7376	2.20701	4.09376	1.83659e-08	2.00421e-07
TTLL12	1.65368	1.74124	0.786881	0.948563	2.56794	2.70278	0.430853	0.491252	-2.38586	2.27349	1.85227e-08	2.01917e-07
TUBA4A	46.0013	55.6655	19.5099	25.0351	55.3786	51.212	9.92294	12.2817	-2.1728	6.42549	1.8797e-08	2.04689e-07
GATSL2	1.47554	1.48786	0.416336	0.537041	1.26713	1.42864	0.280461	0.248268	-2.35141	2.84463	1.89066e-08	2.05664e-07
ZBTB45	2.12797	2.77106	0.980362	1.26884	2.21969	1.9194	0.393644	0.380121	-2.54542	1.84594	1.89737e-08	2.06176e-07
ABRACL	7.28239	7.56758	16.4712	18.2519	17.3076	15.409	70.3472	78.7384	2.18564	4.61198	1.90348e-08	2.06621e-07
BLZF1	4.66042	4.25785	12.9102	10.2397	5.05675	5.18907	26.4397	23.1023	2.19173	4.73386	1.91293e-08	2.07426e-07
PEX6	6.13603	7.76715	3.08278	3.78429	10.5963	8.96314	2.24078	2.28787	-2.21144	4.29723	1.93867e-08	2.09937e-07
CR1L	1.02147	0.603532	1.33277	0.935218	0.222102	0.201407	1.72275	1.52494	2.77852	0.816319	1.94205e-08	2.09937e-07
PIGS	6.787	7.27896	2.32346	2.70229	5.71944	5.06137	1.05282	1.18197	-2.27458	3.53365	1.94223e-08	2.09937e-07
TRAPPC6B	7.59139	6.36172	2.80699	1.83531	4.18825	4.53887	1.11978	0.850748	-2.29942	3.62297	1.94721e-08	2.10253e-07
ERI1	4.19895	3.45262	20.7375	15.5435	3.74035	3.92218	21.928	16.9395	2.17912	5.70607	1.95827e-08	2.11225e-07
CYB561D1	10.9708	11.5505	4.96907	5.37219	10.8067	10.5129	2.8187	2.36409	-2.19254	5.2478	1.9795e-08	2.13291e-07
AP4M1	1.52233	1.71224	0.484329	0.351134	2.10383	1.77259	0.480656	0.33275	-2.6599	1.06573	2.04104e-08	2.1969e-07
SIRT1	12.2643	9.76518	4.41474	2.4601	6.88725	8.27467	2.17433	1.47683	-2.22136	4.61289	2.04925e-08	2.20343e-07
FFAR2	218.499	246.912	1138.3	1330.1	530.338	478.797	2088.89	2363.5	2.15594	11.0731	2.0543e-08	2.20654e-07
LINC00937	0.689477	0.784616	1.65613	1.7957	8.53983	6.62744	32.3498	39.6876	2.21635	2.93028	2.09471e-08	2.24759e-07
UBE2J1	18.4593	15.9031	81.6664	55.065	14.0574	15.0917	73.2447	62.7293	2.15781	7.51176	2.12426e-08	2.27453e-07
PIK3CB	7.39642	5.1148	2.53958	1.54949	3.09649	3.43302	1.3193	0.648927	-2.25442	4.21894	2.17541e-08	2.32687e-07
MTHFD2	1.42971	1.34597	7.13038	6.38314	1.59078	1.9318	9.56628	7.53493	2.24377	3.40064	2.26253e-08	2.41501e-07
FAM219B	3.29162	3.38725	1.09102	1.08805	2.79516	2.57093	0.560365	0.551871	-2.34034	2.77725	2.27842e-08	2.42944e-07
DHRS4-AS1	0.466259	0.576739	0.841097	0.817211	0.707653	0.707114	2.39401	3.48249	2.29884	1.9378	2.38299e-08	2.5383e-07
HK3	12.1883	13.6759	40.5753	49.511	21.1028	18.9074	79.0404	93.5736	2.14866	6.97758	2.40239e-08	2.55631e-07
CCNG2	31.2412	26.4231	9.462	6.50763	27.9056	31.1581	7.81221	6.27205	-2.15354	6.65082	2.41675e-08	2.56893e-07
SLC16A5	32.2593	34.003	16.1427	16.7702	39.1017	36.9122	8.43702	8.72031	-2.16476	5.60117	2.48411e-08	2.63778e-07
ZNF775	0.286691	0.379266	1.02398	1.59908	0.527869	0.397693	2.09224	2.7883	2.40083	1.38115	2.50363e-08	2.65576e-07
NDST2	11.941	12.0627	45.2189	48.0515	10.1525	10.3637	58.4156	44.9841	2.14757	6.91281	2.52564e-08	2.67634e-07
SNHG9	4.22629	6.13005	4.6983	13.6848	6.1829	4.81545	17.666	31.5835	2.35256	1.38585	2.63908e-08	2.79366e-07
TMEM252	2.83494	2.44462	6.00077	4.93138	2.52378	3.14788	15.4017	11.9982	2.24905	2.94008	2.66339e-08	2.81649e-07
CD59	5.25564	4.8369	14.7001	13.3386	7.18899	6.87164	33.2485	31.719	2.14148	6.83323	2.67744e-08	2.82843e-07
PPP2R4	1.2541	1.60329	1.62791	2.54851	0.622814	0.593883	3.23596	3.11662	2.32291	2.38402	2.74395e-08	2.8957e-07
FAM214A	13.3812	10.5011	2.94166	2.27856	11.3698	11.1727	3.10932	2.52465	-2.17103	5.00082	2.76345e-08	2.91328e-07
CHST13	4.44901	5.65849	3.44891	4.46632	2.96776	2.09024	0.566036	0.528914	-2.48788	2.4431	2.77407e-08	2.92147e-07
XPO1	13.5215	10.3769	4.74009	3.02399	3.20354	3.33932	0.858007	0.672292	-2.2524	4.58757	2.79838e-08	2.94405e-07
PSMB3	52.3504	66.8723	164.98	220.85	111.08	90.8873	356.747	487.525	2.13387	7.27026	2.89997e-08	3.0478e-07
ACOX1	37.3619	32.6418	15.1094	11.8686	21.7555	22.5623	5.7323	4.93957	-2.13892	7.20383	2.91638e-08	3.0619e-07
UPP1	5.30975	7.22237	18.5608	24.4113	7.05737	6.40456	21.9725	31.3871	2.15295	4.916	3.00412e-08	3.15079e-07
CD9	17.0479	17.5429	7.23075	7.40063	14.3998	12.1856	3.83539	3.09328	-2.21875	3.76953	3.11942e-08	3.26837e-07
TMEM251	9.39909	10.3598	4.52067	5.024	10.2107	9.6335	2.17141	2.11608	-2.27049	3.1005	3.18509e-08	3.33377e-07
SART1	14.8709	16.1373	44.4615	58.9205	19.6026	20.0442	68.1262	85.5908	2.12641	7.20507	3.24844e-08	3.39661e-07
SNRNP35	1.50869	1.485	1.23709	1.2856	1.78702	1.78875	0.931837	0.234349	-2.92962	0.8609	3.31103e-08	3.45852e-07
RXRA	86.8592	93.1996	43.2982	52.1979	110.941	118.649	24.7008	25.4691	-2.12297	8.75005	3.32059e-08	3.46498e-07
SMC6	0.557976	0.510015	1.52669	1.12673	0.316009	0.369055	1.54366	1.57829	2.32011	2.31352	3.32674e-08	3.46787e-07
COASY	14.1335	14.861	39.1647	45.7545	15.3612	13.6341	63.6002	67.0643	2.12625	6.45056	3.39798e-08	3.53558e-07
USP24	2.16332	1.57523	0.782849	0.646874	1.5212	1.4328	0.461372	0.323539	-2.23309	3.59392	3.39861e-08	3.53558e-07
RBL2	26.782	19.0511	9.40507	5.36788	11.6129	11.7081	4.58262	2.61636	-2.15007	5.79973	3.40697e-08	3.5407e-07
FAM43A	4.75832	4.82407	1.35233	1.25414	4.9844	4.55986	1.21982	1.05611	-2.23855	3.24603	3.41566e-08	3.54612e-07
SAT1	1226.15	1346.01	4277.68	4626.81	2552.16	2461.52	10459.4	11078.6	2.11799	12.4621	3.45908e-08	3.58395e-07
FAS	31.1276	28.3855	92.5699	65.999	34.4456	36.9414	190.851	149.531	2.11805	7.72605	3.59641e-08	3.72247e-07
PLOD1	15.5832	15.7734	4.48226	5.48595	11.2373	12.125	3.02922	2.50145	-2.16741	4.73629	3.6311e-08	3.75286e-07
C5AR2	118.287	134.64	62.1186	69.7927	104.582	101.273	29.4507	23.9941	-2.12388	6.85187	3.6331e-08	3.75286e-07
BAK1	5.15613	6.13347	14.2191	19.2335	8.00582	7.36234	30.7046	35.1283	2.13349	5.11031	3.65931e-08	3.77613e-07
AP1AR	0.764804	0.377027	5.17815	2.8313	0.51442	0.454793	3.91761	2.5817	2.32706	2.5988	3.70371e-08	3.8181e-07
DUSP1	89.4216	99.8258	75.2554	71.3862	121.188	129.837	31.8857	27.9161	-2.11808	7.35459	3.73791e-08	3.84948e-07
C12orf4	0.192413	0.24576	2.79294	1.69868	0.244172	0.199705	1.68944	1.31576	2.42953	2.02186	3.82229e-08	3.92862e-07
SLC19A1	74.4538	85.002	37.1347	45.3872	101.919	98.7335	21.6915	23.52	-2.11546	7.45271	3.82405e-08	3.92862e-07
WDR82	70.4808	65.9156	36.3627	35.5104	50.9756	56.4348	12.5066	11.7506	-2.11707	7.51115	3.82626e-08	3.92862e-07
KLHL18	4.9414	4.74231	1.68883	1.61683	3.66811	3.46938	0.953869	0.79191	-2.21154	3.6972	3.90693e-08	4.00744e-07
RNF122	8.0506	8.69554	13.7016	15.8761	8.74821	8.86582	41.9046	38.2938	2.13003	5.07665	3.92371e-08	4.02063e-07
NOSIP	10.4497	13.4096	28.005	36.9811	27.1417	23.1679	87.5611	117.49	2.11395	5.87856	4.04372e-08	4.13533e-07
TBC1D13	3.92715	3.88404	1.48518	1.51295	2.67936	2.94641	0.624408	0.552729	-2.27708	3.11144	4.07413e-08	4.16227e-07
RGP1	12.2367	12.6164	6.50176	6.28218	12.212	13.9292	3.96202	2.6702	-2.19321	3.92203	4.12461e-08	4.20546e-07
ANKRD54	1.27559	1.45938	0.578104	0.643332	1.21343	0.956507	0.254433	0.166322	-2.86594	0.820364	4.17042e-08	4.24794e-07
CLASRP	21.1387	25.0866	61.279	76.6981	26.754	25.4267	99.138	115.372	2.10846	6.97908	4.19347e-08	4.26584e-07
BTG1	108.942	110.518	45.927	39.7106	122.06	123.73	32.393	28.3481	-2.10626	8.48321	4.19632e-08	4.26584e-07
BRWD1	2.06363	1.48948	0.612199	0.460328	1.70016	1.79779	0.435105	0.379584	-2.16313	4.32425	4.20392e-08	4.26934e-07
GSDMC	0.630134	0.449272	1.39209	1.0996	0.61234	0.782863	3.3521	3.02178	2.30278	1.95024	4.25888e-08	4.32087e-07
FRAT2	167.493	180.034	116.949	140.287	215.154	203.563	56.2384	50.0349	-2.10436	8.28278	4.33627e-08	4.39088e-07
CYP27A1	31.9027	37.1261	15.0903	16.5331	45.3962	43.7584	8.95928	10.4793	-2.11502	5.90742	4.33646e-08	4.39088e-07
PDPK1	24.7169	20.2802	9.64936	7.59996	14.1374	15.0321	4.24663	3.26625	-2.11379	6.4857	4.4222e-08	4.47328e-07
TMCO3	17.8326	16.4602	4.81791	4.82561	7.38016	6.76441	1.56961	1.63013	-2.17859	4.56635	4.55058e-08	4.5986e-07
KCTD21	4.35639	4.30698	2.62917	2.45981	3.605	4.10353	0.824514	0.759019	-2.24765	3.29753	4.55597e-08	4.59951e-07
CHMP4C	0.263399	0.341066	0.915113	0.731899	0.490986	0.481323	1.3209	2.61921	2.41497	0.741669	4.58581e-08	4.62507e-07
MARCKSL1	156.731	178.043	50.0196	63.9557	236.434	213.41	49.2895	55.1705	-2.09946	7.61393	4.68875e-08	4.72425e-07
ABCA9	0.707964	0.60516	2.91365	2.92418	1.07145	1.22038	4.89482	4.74912	2.14805	3.91174	4.74971e-08	4.78097e-07
BBS10	2.08443	1.40045	0.351921	0.291372	0.705707	0.620976	0.0553252	0.0974348	-2.85546	1.35976	4.82593e-08	4.85292e-07
GPX3	12.1198	15.1353	4.69413	5.75407	11.2368	11.6168	2.48044	2.47689	-2.18154	3.8551	4.83369e-08	4.85597e-07
STXBP5	6.6117	4.7047	2.3186	1.41984	6.68833	6.67447	1.89148	1.53644	-2.12203	5.2201	4.86924e-08	4.88689e-07
KCNE5	0.403937	0.295278	0.990383	1.71642	0.832315	0.822907	3.72661	4.24542	2.35041	1.26467	4.88489e-08	4.89779e-07
TOP1P2	1.80245	1.06977	4.73847	3.71265	1.8467	1.82781	10.0792	8.54621	2.21021	2.67814	4.90306e-08	4.9112e-07
NRROS	5.3289	5.87528	0.893875	1.08894	2.97666	3.14291	0.59285	0.592749	-2.32797	2.72116	5.09049e-08	5.09397e-07
ZCCHC10	3.16404	2.9012	10.8898	8.30424	2.35448	2.57918	11.9673	10.4539	2.1505	3.93773	5.13425e-08	5.13275e-07
CCRL2	4.03984	4.58006	22.1965	20.6149	15.1988	14.1805	68.0793	65.0274	2.09708	5.53126	5.30522e-08	5.2985e-07
C7orf25	4.50641	4.2381	1.04225	0.986134	4.70967	4.43325	0.875343	0.964924	-2.28694	2.3256	5.35589e-08	5.3439e-07
TMEM184B	32.8502	35.7101	19.0265	21.4321	28.6932	29.912	9.64324	6.70688	-2.09698	6.41634	5.5062e-08	5.48853e-07
TM6SF1	18.9706	15.4107	9.43044	6.1425	26.3034	25.9219	8.16669	6.06067	-2.11767	4.79815	5.65283e-08	5.62921e-07
FHOD1	72.8947	76.0382	38.7207	44.8297	130.608	130.445	32.9383	30.8118	-2.08369	8.06887	5.72628e-08	5.69129e-07
TSPYL4	3.35551	2.66684	0.931827	0.717476	1.69677	1.71581	0.291868	0.336345	-2.33452	2.60881	5.79486e-08	5.75387e-07
PCMTD2	8.51559	6.9546	4.22556	2.25607	4.15326	4.21691	1.18096	0.912367	-2.18646	3.99097	5.89567e-08	5.8465e-07
SRP19	4.40391	4.68209	5.61504	8.96224	4.85715	4.45305	16.505	21.0561	2.11602	4.11798	5.89957e-08	5.8465e-07
SLC38A1	3.0325	2.26948	1.12308	0.709721	1.08634	1.26606	0.32538	0.224718	-2.2731	3.43977	5.93341e-08	5.87193e-07
CHD1	18.4659	13.6087	46.6342	32.7613	9.65277	11.5977	45.5346	40.8895	2.08271	7.46678	5.93668e-08	5.87193e-07
ZSCAN16	4.03216	3.70414	4.65814	5.17605	5.96033	5.61164	24.1022	25.9372	2.12151	3.65949	5.99287e-08	5.92179e-07
BDNF-AS	0.209471	0.17586	0.297845	0.37076	0.279188	0.433198	0.905707	1.58115	2.50109	0.326777	6.0308e-08	5.95353e-07
NAPA	70.987	83.1762	339.548	410.59	156.975	143.1	619.623	662.473	2.07732	9.17523	6.08934e-08	6.00553e-07
MAPK1	49.8719	39.8175	17.8941	12.7247	29.8247	32.5842	9.09388	7.03559	-2.08376	7.20037	6.13248e-08	6.04227e-07
NDUFS1	5.05309	4.94895	3.04343	2.63534	3.05357	2.78672	0.895109	0.64256	-2.24844	3.33025	6.24496e-08	6.14718e-07
HSPA1A	46.9848	54.5014	143.902	164.566	73.6301	75.5225	294.58	309.822	2.07307	8.4647	6.50248e-08	6.39452e-07
LINC00243	3.35974	3.64945	2.54713	3.52467	6.20157	6.71179	1.24221	1.34102	-2.20917	2.88246	6.52261e-08	6.40817e-07
ZNF277	3.91008	3.60591	10.4383	10.445	5.20951	5.93415	24.2577	22.2356	2.09363	4.85373	6.81174e-08	6.68582e-07
APPL2	19.7091	17.071	7.80761	6.14119	19.5163	19.306	5.40456	4.57173	-2.09385	5.3493	6.86056e-08	6.72729e-07
EIF4G3	6.55853	5.476	13.4942	11.114	7.0054	8.4215	36.3664	29.4617	2.0723	6.58541	6.98553e-08	6.84328e-07
ARSG	18.9885	17.1975	4.21018	3.76132	15.0187	16.0668	4.16329	3.48828	-2.10614	4.84562	7.01899e-08	6.86949e-07
PPP1R3E	4.94989	4.43633	2.00807	1.76353	4.62784	4.31687	1.40757	1.04752	-2.14329	3.79133	7.19147e-08	7.03158e-07
FIBP	1.57552	1.92607	7.04388	8.53767	1.9473	1.96088	8.35864	8.83331	2.18136	2.86855	7.22095e-08	7.05368e-07
AGO1	7.63802	6.33249	2.60749	2.20446	4.63362	5.3883	1.08186	1.0702	-2.11421	4.85731	7.23291e-08	7.05863e-07
FOXO3	21.2225	18.3667	4.8688	4.49645	18.1409	18.8494	3.69054	4.30913	-2.07377	6.43055	7.25608e-08	7.07451e-07
ZNF33A	17.7888	12.8523	5.41233	4.08267	11.1338	11.3724	2.77023	2.62254	-2.08589	5.73203	7.39675e-08	7.2048e-07
NDE1	52.7795	48.5345	18.9489	20.1344	50.9273	57.0847	14.1071	12.1399	-2.06867	7.07799	7.41473e-08	7.21545e-07
DICER1-AS1	1.00045	1.35006	0.890097	0.893141	3.05702	2.3962	0.49082	0.434756	-2.81275	0.135059	7.5052e-08	7.29656e-07
TMEM106B	1.83099	1.32324	0.700306	0.439326	2.22533	2.21436	0.851005	0.490886	-2.18045	3.04409	7.58903e-08	7.37107e-07
OXER1	12.9376	15.8781	4.25777	4.58903	7.6679	6.89255	1.54108	1.6873	-2.184	3.61738	7.59892e-08	7.37369e-07
SLC26A8	3.79452	2.97187	14.2117	12.5683	3.21713	3.44128	14.9713	13.6983	2.09013	4.88675	7.85195e-08	7.61201e-07
MKNK2	165.209	189.093	117.061	137.798	226.429	234.902	54.367	54.3894	-2.05766	9.12406	8.00759e-08	7.75555e-07
IRF2	89.2818	85.0292	274.829	242.898	99.4906	102.127	506.101	413.751	2.05613	9.01744	8.13273e-08	7.86552e-07
SYTL3	11.1848	10.8886	19.3364	17.2093	6.52723	7.12742	31.639	27.4648	2.07302	5.57231	8.13648e-08	7.86552e-07
SCML4	1.26915	1.00799	1.84734	1.73293	1.80019	2.00707	8.38566	7.69502	2.09574	3.87018	8.22079e-08	7.93953e-07
NMI	61.693	62.5047	346.142	359.413	113.594	110.033	465.233	472.118	2.05526	8.52377	8.27616e-08	7.98548e-07
PARP16	1.9632	2.09662	0.478863	0.420051	1.86379	1.76835	0.299108	0.343044	-2.44136	1.57311	8.31733e-08	8.01765e-07
ZCCHC2	8.5396	7.28912	53.2025	40.0855	9.95362	11.5016	49.368	41.4315	2.05743	7.35315	8.37813e-08	8.06868e-07
LILRA2	104.159	113.941	35.9938	39.8903	150.929	128.16	35.8892	36.2852	-2.05641	7.57407	8.39268e-08	8.07509e-07
UQCRFS1	7.02781	9.66343	17.1721	23.2298	10.7131	8.07092	41.0655	45.2108	2.07726	4.63391	8.50015e-08	8.16977e-07
EXOSC2	1.14337	1.17697	1.93622	1.74585	1.2278	1.16546	3.747	5.49122	2.16094	2.49056	8.50702e-08	8.16977e-07
SCYL3	2.71536	2.61845	8.60047	7.74094	2.03567	1.83956	12.1821	8.76236	2.10576	4.16813	8.52503e-08	8.1794e-07
MRFAP1L1	22.0213	22.8023	12.6736	12.5181	23.3551	22.427	5.33119	5.46607	-2.09512	4.65667	8.70157e-08	8.34097e-07
DHRS12	1.76712	1.92874	6.84787	7.30526	5.34557	4.59958	20.0312	22.616	2.08089	4.12291	8.86589e-08	8.49036e-07
GLIPR1	65.113	48.9234	19.6025	13.4776	29.1961	28.4105	8.58174	6.99978	-2.06038	6.7501	8.87623e-08	8.49036e-07
BAHD1	1.44418	1.5583	0.751574	0.936964	1.62487	1.5152	0.582658	0.336998	-2.26928	2.37803	8.88227e-08	8.49036e-07
ZNF18	8.76495	8.19311	4.15425	4.22864	6.69041	6.4974	1.69632	1.51936	-2.13855	3.85971	8.89208e-08	8.49181e-07
LINC01011	1.3029	1.37497	5.17466	5.25785	1.35311	1.31562	6.14786	5.9618	2.13938	3.29457	8.90075e-08	8.49218e-07
CEP170P1	8.92917	6.81494	1.35599	0.70845	2.10463	2.81346	0.499117	0.279971	-2.90892	1.67833	9.0537e-08	8.63007e-07
NANS	4.536	6.23752	29.8774	39.4674	7.57101	6.01262	23.9926	32.0827	2.0832	4.53831	9.09118e-08	8.65774e-07
ZNF625-ZNF20	2.6561	2.49165	1.12024	1.32843	2.3063	2.47193	0.492374	0.479396	-2.26607	2.52236	9.56624e-08	9.1017e-07
ADM	35.1908	40.1967	167.068	192.044	112.32	109.94	441.661	463.103	2.04371	8.27784	9.64932e-08	9.17222e-07
PRR14L	6.0538	5.0386	2.17799	1.65259	2.82541	2.68103	0.731641	0.661322	-2.09499	4.88691	9.77887e-08	9.28675e-07
PSTPIP2	8.42727	7.23257	31.6166	26.315	14.2573	15.8888	74.3787	58.8945	2.04643	6.48551	9.93482e-08	9.42105e-07
PRICKLE3	2.40017	2.70159	1.10319	0.948955	1.68665	1.5938	0.17933	0.316812	-2.41206	1.96586	9.93867e-08	9.42105e-07
TAF3	1.58632	1.62211	2.03844	2.51507	1.19721	1.23203	4.79506	5.23555	2.12858	3.06328	1.00051e-07	9.46304e-07
MFSD2A	1.25086	1.23423	0.6449	0.517898	0.967609	0.907234	0.0136998	0.124175	-2.96063	0.69192	1.00053e-07	9.46304e-07
CD247	2.21315	1.96122	3.09516	3.0997	2.14042	1.50254	8.70833	9.37293	2.13051	2.75756	1.00107e-07	9.46304e-07
TXNL4B	3.29013	2.79716	8.17833	8.31221	3.14311	3.13802	13.0189	13.3167	2.08293	4.13348	1.01804e-07	9.61465e-07
TXN	34.1305	44.5288	91.2707	116.103	68.8748	61.631	243.166	283.742	2.04253	6.67781	1.02183e-07	9.63809e-07
AATK	92.1455	105.96	39.6253	45.0106	103.211	106.547	25.2669	25.092	-2.0403	8.49361	1.02241e-07	9.63809e-07
LINC00309	0.133282	0.149439	0.323943	0.575262	0.307473	0.334328	0.93186	1.53664	2.32089	0.842337	1.03347e-07	9.73342e-07
APOBEC3A	152.939	151.355	491.243	557.674	231.62	225.56	967.805	950.481	2.0369	9.39456	1.04664e-07	9.84846e-07
S1PR4	112.544	153.512	92.6825	128.798	215.657	170.5	37.7423	52.445	-2.03986	7.5866	1.04873e-07	9.85898e-07
VWF	0.896856	0.740645	0.349764	0.212996	0.887483	0.931097	0.196697	0.185343	-2.2593	2.29479	1.05767e-07	9.91581e-07
ZNF20	2.95135	2.77047	1.24326	1.48351	2.56348	2.73318	0.540704	0.535362	-2.2593	2.51436	1.05767e-07	9.91581e-07
SERPINB6	3.96859	3.46297	13.6249	14.9803	5.96581	6.25076	22.7408	24.861	2.05907	4.71998	1.08736e-07	1.01848e-06
LRG1	39.3479	48.9655	329.354	415.079	49.7777	49.2532	173.259	204.129	2.03591	8.18642	1.09389e-07	1.02366e-06
CEBPG	2.36991	2.10703	0.706106	0.623649	1.48752	1.20633	0.319816	0.296279	-2.32756	2.11997	1.1124e-07	1.04003e-06
MFNG	43.6527	48.7336	16.0296	20.3009	70.8318	64.9317	19.1137	17.2317	-2.03932	6.32379	1.12937e-07	1.05494e-06
STK35	7.84838	7.45161	5.0528	4.87473	6.32808	7.4607	2.08257	1.50718	-2.06988	5.09547	1.13285e-07	1.05722e-06
TICAM1	4.33731	4.75631	12.0402	13.7173	4.89187	5.28075	22.0232	20.339	2.05576	4.89494	1.14443e-07	1.06706e-06
SNX27	26.5608	20.5225	6.10723	5.04233	17.0371	17.3911	5.19057	4.14319	-2.03985	6.49792	1.15508e-07	1.07583e-06
DCAF12	13.2617	11.9318	28.2696	20.2305	9.37361	10.7167	53.7302	38.4609	2.03671	6.41546	1.15594e-07	1.07583e-06
CEP162	0.346345	0.310396	1.11504	0.717451	0.529749	0.557933	2.88801	2.35444	2.15188	2.51071	1.1907e-07	1.10718e-06
PSTPIP1	69.394	70.6569	28.8179	38.1748	97.1592	87.4955	17.7731	23.7295	-2.03366	6.65098	1.19389e-07	1.10914e-06
41882	1.05525	0.626917	1.06054	1.3229	1.76202	1.32411	6.57593	7.78091	2.14258	2.10284	1.20039e-07	1.11416e-06
C1GALT1C1	6.37534	6.45109	20.8549	19.0956	7.92325	7.66357	34.4392	32.7977	2.04941	5.01307	1.20477e-07	1.11722e-06
NFKBID	32.6515	32.6906	28.6429	27.5421	27.8013	27.0458	6.19652	6.70018	-2.05285	5.44079	1.28141e-07	1.18721e-06
MED14	6.20841	4.46304	2.35471	1.6028	2.63495	2.91152	0.951386	0.607877	-2.11584	4.20453	1.28514e-07	1.1896e-06
TMEM110	2.34287	2.13149	4.08204	4.30017	1.99006	2.09648	10.3414	8.27451	2.05582	4.39711	1.32152e-07	1.22217e-06
GHRL	10.6261	10.9105	3.48465	5.20621	16.2012	17.3693	3.87823	3.79976	-2.09205	3.59789	1.33045e-07	1.22932e-06
CEP164	3.3438	3.57163	10.1187	12.0454	3.73878	3.46564	14.371	15.2769	2.03069	5.53616	1.34e-07	1.23597e-06
TMEM92-AS1	11.4904	12.0158	9.36194	11.6939	11.5464	9.27732	2.59159	2.49338	-2.21107	2.72587	1.34018e-07	1.23597e-06
NRDE2	3.22308	3.29298	1.07838	1.13132	4.8059	4.47642	0.84503	1.11862	-2.10301	3.33031	1.34126e-07	1.23597e-06
HDAC3	10.8955	11.9275	4.87273	4.60066	12.0888	10.8787	2.53356	2.84113	-2.08908	3.88661	1.35367e-07	1.24628e-06
NOMO2	5.44831	4.99515	1.5863	1.37403	4.50529	4.71968	1.34948	1.04888	-2.10269	3.7392	1.36815e-07	1.25848e-06
OPRL1	11.9448	12.756	7.31618	8.94249	12.4266	11.3611	2.79426	2.99419	-2.05316	4.89783	1.3975e-07	1.28432e-06
ATP5C1	8.04686	8.33671	9.8449	12.8164	5.71411	7.03077	19.7579	23.8856	2.06349	3.77559	1.44021e-07	1.32238e-06
LINC01410	2.64847	2.17566	7.35526	5.61632	2.97472	3.0852	12.3058	12.3297	2.05127	4.12574	1.44506e-07	1.32566e-06
CORO1B	10.5933	12.294	3.93449	5.06506	18.4598	17.2403	3.41972	4.4372	-2.05663	4.19113	1.44674e-07	1.326e-06
LPPR2	83.7887	95.4225	35.9569	40.7976	139.403	137.86	37.4174	34.4987	-2.01464	7.68877	1.45783e-07	1.33498e-06
GBA2	61.121	65.5023	30.9095	33.2987	75.4848	72.3214	20.298	18.6654	-2.01581	7.41351	1.46198e-07	1.33677e-06
GRK6	74.0181	89.6485	38.3326	50.7647	70.6232	72.3379	15.9938	17.4454	-2.01729	7.30751	1.46239e-07	1.33677e-06
MIR103A2	5.26158	4.91552	23.1682	16.2648	9.24967	8.38564	56.3595	49.2519	2.4122	0.765523	1.49335e-07	1.36385e-06
POM121	6.72327	6.19476	2.10152	2.18174	2.38875	3.24484	0.763462	0.556165	-2.10258	4.41355	1.53065e-07	1.39667e-06
SUV420H1	7.64663	6.96739	3.44751	2.9512	4.2445	4.44247	1.26658	1.01072	-2.07016	4.54672	1.58725e-07	1.44574e-06
JAK2	3.75242	2.70091	6.69998	3.9926	2.16713	2.46368	11.507	8.88194	2.03506	4.80094	1.59667e-07	1.45303e-06
PSMA6	17.3519	19.6575	41.2951	47.2589	27.1683	25.397	94.4342	109.678	2.01326	5.74492	1.59958e-07	1.45439e-06
KIAA0232	26.6422	20.77	11.0624	8.70875	14.7294	15.4718	4.02874	3.64467	-2.01483	6.6897	1.61539e-07	1.46684e-06
ZNF211	2.03913	1.98497	0.971848	0.733425	1.29055	1.57728	0.382273	0.231831	-2.47626	1.70433	1.61614e-07	1.46684e-06
AMMECR1L	4.3894	3.5676	1.69782	1.38166	1.81959	2.28568	0.641295	0.398045	-2.19242	3.24819	1.68528e-07	1.52689e-06
BRD3	10.163	9.81941	3.92808	3.76636	9.12692	8.94483	2.11608	2.23343	-2.03084	5.14308	1.69588e-07	1.53513e-06
RPRD1A	5.36313	4.32139	2.15696	1.49334	3.2841	3.14664	1.06663	0.763085	-2.10548	3.61308	1.72283e-07	1.55815e-06
USP42	2.84018	2.53105	5.25545	4.50822	3.08692	3.21219	11.8341	12.5111	2.01895	4.87372	1.73855e-07	1.57098e-06
FAR2	3.83751	3.22132	4.75254	3.45559	5.00584	5.17227	25.9163	20.2296	2.01477	5.09326	1.76713e-07	1.5954e-06
SUSD3	5.84893	7.81689	9.18902	10.6607	14.784	13.3609	44.7447	59.5725	2.01059	4.78282	1.7705e-07	1.59684e-06
TOPBP1	4.98746	3.8957	2.16816	1.42549	2.54596	2.95448	0.843245	0.588869	-2.11208	3.70255	1.77185e-07	1.59684e-06
RRBP1	5.96719	7.07418	17.8548	24.4271	6.59936	8.22855	21.6908	26.5275	2.00708	5.8107	1.78151e-07	1.60414e-06
GGTA1P	0.569708	0.344548	0.934979	1.20004	0.390083	0.344128	1.80324	2.06195	2.40163	0.764207	1.79269e-07	1.61279e-06
BTG3	0.314357	0.263669	0.522888	0.795894	0.302234	0.200659	1.16021	1.77295	2.55165	0.115171	1.79914e-07	1.61718e-06
TRIP4	7.4065	6.90797	4.2048	3.55671	7.85485	6.12187	2.49177	1.84222	-2.09205	3.37417	1.81116e-07	1.62656e-06
NPL	63.5863	55.8972	28.4315	22.6655	43.3553	42.8753	14.5528	10.8268	-2.00159	6.73906	1.88704e-07	1.69322e-06
IFITM1	459.191	587.145	2156.99	2968.49	2033.44	1604.35	5964.18	8085.83	1.99147	11.0623	1.89461e-07	1.69852e-06
FAM63A	50.2593	52.1198	23.932	24.8915	40.5548	43.1388	11.7961	10.1268	-2.00169	6.51126	1.91929e-07	1.71914e-06
CAPNS2	0.316869	0.367807	1.27322	1.0954	0.678489	0.731057	4.05174	3.56189	2.39172	0.621126	1.98911e-07	1.78012e-06
YIPF1	4.01196	4.58116	26.4813	26.5542	5.76661	5.07702	24.516	23.3392	2.01693	4.84006	2.01377e-07	1.80062e-06
RRAGC	24.6374	24.4471	10.9925	10.4187	26.7257	27.9206	8.10055	6.64419	-2.00804	5.58	2.03206e-07	1.81539e-06
ARRDC2	46.2628	51.4966	21.9539	26.3557	100.631	97.5065	23.9679	25.339	-1.98963	6.95878	2.07108e-07	1.84733e-06
UBQLNL	0.0463275	0.0220667	0.682688	0.561056	0.41182	0.20148	2.17125	2.01739	2.29203	0.843728	2.07191e-07	1.84733e-06
TMEM185A	2.5959	2.88067	1.01386	1.16255	2.17057	2.47814	0.597745	0.458713	-2.24214	2.24667	2.07322e-07	1.84733e-06
PINK1	35.9727	40.5303	13.7493	15.6955	65.482	62.9767	13.4781	16.4644	-1.99174	6.45848	2.07803e-07	1.85001e-06
DTD2	1.60247	1.3173	2.49964	2.35579	1.76914	2.05863	4.86699	7.35786	2.05617	3.00071	2.10879e-07	1.87576e-06
GTF2F1	7.67923	7.99053	15.2769	18.8002	10.6627	11.1834	35.0074	42.4231	1.99226	5.57106	2.1396e-07	1.90152e-06
NDUFC2	1.50316	1.68469	3.17683	3.40091	1.52081	1.52692	4.50122	6.38604	2.06999	2.87873	2.15932e-07	1.91738e-06
ROCK2	1.77359	1.26594	3.65464	2.81788	1.56172	1.66603	7.07432	6.31954	2.01665	4.38743	2.17181e-07	1.9268e-06
SQRDL	60.2976	63.104	177.305	189.604	135.32	125.475	525.674	534.227	1.98108	8.82479	2.19553e-07	1.94616e-06
H3F3B	288.995	315.18	827.774	912.781	420.243	384.178	1501.29	1657.95	1.9801	11.1396	2.20063e-07	1.94899e-06
ZBTB33	1.61489	1.22787	3.04713	1.32411	0.795966	0.781232	4.96168	3.32299	2.06162	3.50457	2.20711e-07	1.95304e-06
ITPKB	26.4482	25.9267	8.98747	9.81822	32.3758	36.9164	9.82843	8.17255	-1.98605	6.93205	2.21057e-07	1.95442e-06
VPS9D1-AS1	0.0616819	0.0504177	0.0961567	0.432425	0.422084	0.15386	1.11883	2.19147	2.37581	0.0101182	2.22865e-07	1.9687e-06
MAP3K3	41.214	43.1935	15.0332	17.2382	47.0354	48.1265	11.3199	11.9029	-1.98243	7.14822	2.29368e-07	2.02441e-06
ELF1	55.0107	39.4271	90.8421	56.2815	33.61	37.397	165.638	132.468	1.97868	8.15701	2.30133e-07	2.02766e-06
P2RY2	6.95507	7.19642	4.23812	4.83988	5.70352	6.25559	1.58598	1.41795	-2.00802	5.3838	2.31723e-07	2.03992e-06
ARNT	6.68327	5.91241	2.67974	2.00646	5.09305	6.05702	1.80067	1.24198	-2.03584	4.28067	2.32275e-07	2.04124e-06
F8A2	8.8726	10.863	3.06624	3.93693	11.6342	10.9185	2.68528	2.7099	-2.10195	2.94049	2.32471e-07	2.04124e-06
F8A3	8.8726	10.863	3.06624	3.93693	11.6342	10.9185	2.68528	2.7099	-2.10195	2.94049	2.32471e-07	2.04124e-06
TMEM81	4.21136	4.18242	2.24811	2.70049	7.21421	7.39143	1.85064	1.63819	-2.13858	2.40013	2.3498e-07	2.06151e-06
ZSWIM4	1.95115	2.43417	1.30858	1.46919	2.0999	2.35763	0.600363	0.474354	-2.14612	2.79321	2.3829e-07	2.08747e-06
RALBP1	58.2096	54.0901	29.2018	29.5538	50.2667	49.8548	12.0007	12.7552	-1.97851	7.33189	2.42037e-07	2.11798e-06
C16orf74	1.92341	2.31864	0.346762	0.594616	3.62061	2.9462	0.501783	0.637722	-2.50459	0.578289	2.43217e-07	2.12649e-06
UNK	2.96232	3.17326	8.04133	9.53348	3.18922	2.99422	13.287	12.7478	1.99894	4.75631	2.44078e-07	2.1313e-06
PTPN7	13.9844	15.2819	5.83039	6.69329	19.6867	19.4545	4.18508	4.94538	-1.99305	5.40976	2.44183e-07	2.1313e-06
MIIP	5.34691	8.08276	12.844	16.8762	12.0418	9.72568	34.3887	47.6566	1.98461	5.04893	2.44619e-07	2.13329e-06
EMILIN2	8.42642	8.62611	26.4193	28.5817	3.07767	3.62717	13.8432	12.3021	1.99896	5.71689	2.45915e-07	2.14276e-06
VPS9D1	21.0963	24.0499	84.9172	106.582	58.6264	51.3024	205.448	230.128	1.97281	8.0703	2.46889e-07	2.14942e-06
CNOT10	10.669	10.0884	6.94361	6.03025	14.1236	15.5369	3.80844	3.50291	-2.01145	4.63942	2.47905e-07	2.15644e-06
NOMO1	5.66953	5.48847	1.54381	1.34231	4.05577	4.28564	1.19324	0.96871	-2.06576	3.7095	2.48342e-07	2.1584e-06
MCM7	10.5191	11.146	3.84187	4.9	12.0447	11.4144	2.71312	2.98758	-2.01132	4.5247	2.49133e-07	2.16344e-06
GTF2A1	12.6711	7.9716	4.99607	2.50758	7.23737	7.57181	2.71892	1.80694	-2.00189	5.24983	2.51598e-07	2.1819e-06
RALGDS	16.6102	19.0864	18.951	20.0396	38.7296	38.6921	11.6461	9.82704	-1.9786	6.33085	2.51684e-07	2.1819e-06
ETV6	16.583	14.1378	60.8104	56.402	32.6629	32.744	140.962	127.856	1.96879	8.49309	2.59154e-07	2.24476e-06
SH3BP5L	23.5263	25.8845	9.03094	10.8613	21.471	21.5387	5.22491	5.40306	-1.99052	5.61319	2.60757e-07	2.25673e-06
DDX21	22.6914	20.3087	57.3703	49.3687	10.8329	12.7684	46.6564	42.4541	1.97048	7.30845	2.66782e-07	2.30694e-06
CDC16	2.26841	2.11326	1.29557	1.15897	1.85864	1.67727	0.623458	0.368297	-2.33488	1.72372	2.67452e-07	2.31078e-06
KLHL24	11.8389	8.28892	4.47236	2.79587	8.06762	8.86916	3.00967	2.02841	-1.99177	5.50051	2.69453e-07	2.32389e-06
UBE2O	2.03536	1.94938	3.24212	3.53612	1.42601	1.59512	7.25417	5.7361	2.00804	4.16535	2.69561e-07	2.32389e-06
SKI	59.8462	56.3812	28.6826	31.6268	39.8068	48.738	13.6719	10.1609	-1.96998	7.68756	2.69651e-07	2.32389e-06
OTX1	1.78635	1.88753	0.776106	0.825742	1.26071	1.36763	0.283371	0.234226	-2.42773	1.66755	2.71202e-07	2.3353e-06
HSPA1B	34.2347	38.5575	107.834	122.2	51.3682	52.9206	203.117	200.508	1.96471	7.99663	2.75928e-07	2.374e-06
FLCN	19.3664	19.4904	7.57062	6.38954	20.7314	19.9991	6.54524	5.26236	-1.97802	5.60257	2.80779e-07	2.41371e-06
MSRB1	216.204	278.897	580.879	736.182	361.792	320.906	1227.8	1408.83	1.96127	9.77621	2.82623e-07	2.42753e-06
GPR84	4.41848	4.37613	13.441	10.6943	0.66141	0.84321	3.15431	3.186	2.26777	2.94877	2.84185e-07	2.43889e-06
ZKSCAN4	0.55822	0.745108	0.18634	0.206013	1.28931	1.38345	0.282115	0.282067	-2.19226	1.74589	2.85933e-07	2.45184e-06
REPS1	0.955765	0.890656	2.35816	1.96731	0.757615	0.670037	3.69112	3.16845	2.06413	2.86467	2.89285e-07	2.47852e-06
PHF20	33.3358	29.8819	11.9244	12.0769	31.4688	32.7621	7.17139	8.06771	-1.96368	6.9396	2.9743e-07	2.54617e-06
LINC01137	1.53737	1.93127	0.916908	1.01785	5.99739	5.2247	0.844923	1.35555	-2.14527	1.76623	3.01886e-07	2.58215e-06
TNFRSF10A	2.33317	2.43883	5.25286	5.90695	2.53018	2.77066	11.1955	10.3339	2.02999	3.22863	3.02525e-07	2.58547e-06
KIAA0196	4.11919	3.43606	2.22419	1.37364	2.51082	2.29162	1.06219	0.583378	-2.10551	3.20319	3.19423e-07	2.72369e-06
LOC154761	0.299968	0.419278	3.21483	3.18544	0.44604	0.384487	2.28228	2.08876	2.22709	1.96765	3.19497e-07	2.72369e-06
AIDA	4.30965	3.8244	9.85199	7.25061	4.33769	5.33777	21.5065	17.0825	1.9775	4.78849	3.20729e-07	2.73148e-06
H3F3C	82.0482	90.0179	239.878	256.324	124.072	115.18	443.506	480.4	1.95305	7.91884	3.20943e-07	2.73148e-06
TUBA4B	2.75064	3.65391	1.22347	1.83694	3.64951	3.41664	0.528952	0.755552	-2.27176	1.64213	3.23753e-07	2.75311e-06
CBL	32.3001	25.1835	12.3316	8.84946	21.8433	22.6695	8.74394	5.63301	-1.95521	7.59363	3.24703e-07	2.7589e-06
KDM3B	37.6194	30.9968	15.2671	11.9049	21.233	24.3035	6.72046	5.46474	-1.95807	7.03102	3.27836e-07	2.78321e-06
EDEM3	9.58089	5.97439	4.78775	2.80288	4.63248	4.83337	1.57432	1.15817	-1.9999	4.87516	3.33123e-07	2.82342e-06
RANBP2	8.57209	6.79899	9.05824	5.95787	4.8073	5.17446	1.59172	1.22483	-1.97262	5.98324	3.43169e-07	2.90376e-06
TRIB1	57.5617	51.8402	36.2519	26.0384	62.4769	67.1362	21.1726	16.1708	-1.94992	7.26602	3.49467e-07	2.95461e-06
AKR1B10	0.749572	0.625346	0.938851	0.986857	1.11061	1.12184	3.07004	4.84367	2.12456	1.43429	3.50911e-07	2.96437e-06
ADCK3	42.8661	47.3139	17.1777	18.8048	20.8809	20.3643	4.87241	5.33765	-1.96788	6.02172	3.52909e-07	2.97879e-06
P2RY13	135.107	123.924	302.763	249.462	122.811	129.377	498.877	472.559	1.94405	9.46013	3.54542e-07	2.99012e-06
LOC100130331	1.64512	1.33427	0.760657	0.922303	1.23398	1.14515	0.439558	0.238536	-2.37056	1.61406	3.59037e-07	3.02458e-06
DDX26B	3.85366	3.2623	6.79522	5.18106	2.90455	3.01458	13.506	11.4071	1.97351	4.58699	3.59218e-07	3.02458e-06
IRS2	22.699	22.0688	7.86629	6.53514	21.9865	23.9428	6.68276	5.69547	-1.94873	6.68385	3.67219e-07	3.08546e-06
SURF6	4.65338	4.94773	1.28739	1.69573	4.74169	4.57043	1.01165	1.11916	-2.08286	2.81457	3.67651e-07	3.08546e-06
ZNF646	13.7946	15.0318	9.08536	10.591	11.0142	12.6578	3.65182	2.82528	-1.96288	5.93262	3.67654e-07	3.08546e-06
C11orf54	11.3888	10.4448	4.88793	4.36898	8.88917	9.15967	3.16282	2.21796	-2.00276	4.21916	3.71666e-07	3.11658e-06
RTN2	10.4379	11.5417	5.32546	6.26765	24.6059	22.468	5.61523	6.29089	-1.96764	4.72868	3.72187e-07	3.1184e-06
SYK	71.1822	61.3039	22.4497	21.8005	62.4638	62.2893	16.3285	16.2461	-1.94292	7.74129	3.74548e-07	3.13561e-06
GK	58.5864	48.7905	237.872	166.182	66.9259	71.414	316.064	256.59	1.93883	9.44997	3.79743e-07	3.17651e-06
F8A1	15.4614	17.8773	6.28001	7.28557	22.5687	20.66	4.55599	5.73538	-1.97633	4.42037	3.8596e-07	3.22588e-06
BRPF3	11.8394	10.1237	3.38327	2.72005	6.78472	7.97461	3.0345	1.72765	-1.97345	5.16499	3.89207e-07	3.25037e-06
ENKD1	3.25421	3.44639	1.05146	1.63495	5.91224	5.07581	1.07508	1.37046	-2.10888	2.14838	3.9081e-07	3.2611e-06
COG8	3.21752	3.90311	1.55235	1.72004	2.52852	2.41891	0.673931	0.556889	-2.18258	2.38317	3.96695e-07	3.30751e-06
MAP2K4	27.4574	23.4405	12.2145	8.76529	19.5923	21.1736	6.38819	5.07863	-1.94776	5.91007	4.14006e-07	3.44682e-06
APOBEC3A_B	117.5	109.133	324.023	374.236	157.616	157.996	648.462	601.775	1.93281	8.42387	4.14076e-07	3.44682e-06
HIPK1	20.1816	14.4045	6.92837	4.3879	9.13748	10.356	3.6843	2.3706	-1.94653	6.18683	4.22208e-07	3.51166e-06
SF3A1	43.7753	42.2211	28.7575	27.077	30.0386	35.3763	10.6167	7.84124	-1.93766	7.18135	4.22999e-07	3.51538e-06
HOMER3	5.22728	5.65427	2.07501	2.12508	11.2362	11.0353	2.31799	2.8145	-1.99714	3.40132	4.2429e-07	3.52326e-06
TMEM53	0.416726	0.370344	1.08634	1.40123	0.531621	0.793067	2.0617	2.40144	2.17515	1.43153	4.28682e-07	3.55684e-06
ESCO1	6.1347	4.90508	2.51828	1.61215	3.5335	3.585	0.921132	0.870406	-2.02125	3.7646	4.31175e-07	3.57463e-06
NLRX1	2.76509	3.142	0.642379	0.725083	1.57131	1.58138	0.392251	0.353221	-2.15308	2.54607	4.33829e-07	3.59373e-06
SIGLEC7	22.3273	25.5822	11.9968	14.4988	38.8989	35.0725	9.51063	10.0702	-1.94961	5.20435	4.37169e-07	3.61848e-06
SMAD7	7.09006	7.06904	2.45471	2.18414	12.5984	13.4804	3.73577	3.22636	-1.96523	4.32541	4.37643e-07	3.61947e-06
C7orf26	9.54257	11.0635	5.44177	5.62767	13.2677	13.1523	3.39324	3.36739	-1.97817	4.1459	4.3871e-07	3.62537e-06
PATE2	1.09087	0.707305	1.74221	2.29716	1.16164	1.42042	3.24958	4.94933	2.09089	1.77501	4.48084e-07	3.69986e-06
RAB39B	1.35625	1.39376	0.433415	0.314709	1.00875	1.27591	0.247688	0.198145	-2.34742	1.47746	4.50492e-07	3.71674e-06
PLXNC1	105.111	81.8499	55.6249	34.8883	61.3081	64.5736	24.3323	16.1246	-1.92681	8.67093	4.53984e-07	3.74254e-06
ANKMY1	1.13926	1.00899	0.435836	0.410595	0.569204	0.676331	0.139059	0.0799301	-2.83074	0.975363	4.60481e-07	3.79305e-06
TACC1	38.0829	31.3815	10.1968	8.63925	26.147	27.4065	6.69356	6.87373	-1.92747	7.24436	4.6985e-07	3.86493e-06
MIR142	29.9068	43.405	37.4218	118.348	100.914	58.0367	166.009	392.927	1.96109	3.3671	4.69963e-07	3.86493e-06
SH2B3	60.268	53.4558	26.8182	19.4351	29.2868	33.9736	13.3202	7.69803	-1.92768	7.36723	4.79271e-07	3.93833e-06
GALNT7	6.78716	4.92966	2.99996	1.83576	4.8855	5.28132	2.03431	1.23127	-1.9883	4.01696	4.86809e-07	3.99706e-06
MGME1	8.66794	8.50313	2.60002	2.61035	6.02471	5.95395	1.23545	1.4853	-2.02004	3.484	4.92911e-07	4.04393e-06
STAT1	47.3941	40.3089	400.539	289.808	71.1135	80.73	382.695	268.817	1.91843	9.73404	4.93633e-07	4.04435e-06
SAP18	16.1	18.256	27.4532	33.2164	21.3816	18.9712	68.1463	81.0921	1.92319	6.3555	4.93753e-07	4.04435e-06
ZNF776	5.6381	4.90178	2.87236	2.16177	2.58588	2.83305	0.91002	0.632322	-2.03182	3.90261	4.95167e-07	4.0527e-06
CIR1	115.609	110.383	302.954	343.027	262.289	260.273	789.836	990.032	1.91632	9.47468	5.05089e-07	4.13061e-06
ZEB1-AS1	3.33386	2.93956	1.26728	1.12704	1.55921	1.80586	0.532183	0.303261	-2.36164	1.85175	5.06213e-07	4.13649e-06
MAP4K2	27.1944	29.3865	12.7439	15.0608	41.4775	38.7365	10.6211	10.9262	-1.92453	6.12812	5.12561e-07	4.18503e-06
CD47	11.1364	9.43506	15.2322	11.5308	11.507	11.5509	43.1616	43.5027	1.91858	6.71387	5.16157e-07	4.21103e-06
AZI2	3.78783	3.21938	16.2549	12.9075	3.52995	3.92285	15.795	13.544	1.9399	4.9824	5.27931e-07	4.30367e-06
REPS2	12.5466	9.85867	2.81305	2.29109	11.4865	11.8914	3.20949	3.02449	-1.92516	5.82869	5.32366e-07	4.33637e-06
ACP6	1.83199	2.07503	0.395325	0.295006	1.7147	1.70201	0.248949	0.316392	-2.43753	0.993067	5.37918e-07	4.37811e-06
SLC36A1	16.9782	14.2623	5.80473	4.5969	9.12289	9.0398	3.1809	2.38697	-1.93428	5.56345	5.73133e-07	4.66103e-06
HIP1	41.6608	33.1619	19.3289	18.8549	25.1115	29.7297	7.29251	6.67334	-1.91186	7.51389	5.7364e-07	4.66145e-06
EXOC5	2.0371	1.37963	1.05217	0.48503	0.801899	0.905454	0.365258	0.183624	-2.12644	2.94824	5.74972e-07	4.66857e-06
C7orf65	0.727672	0.659572	1.55077	2.1478	1.38804	1.37859	4.1443	5.50614	1.98791	2.6753	5.78589e-07	4.69422e-06
SLC30A7	2.24324	1.79168	6.13512	4.2697	1.58069	1.88221	7.81603	6.02536	1.93047	5.02739	5.79254e-07	4.6959e-06
AGPAT1	20.6326	22.8493	8.41829	9.79252	27.1987	27.4191	7.91184	7.16747	-1.92398	5.21392	6.14551e-07	4.97417e-06
KLHL21	51.7506	56.0342	29.6477	30.1625	58.5979	60.2632	22.1484	15.6489	-1.90478	7.51638	6.16194e-07	4.98353e-06
CX3CR1	1.82495	1.51467	1.29164	0.935378	0.453776	0.431848	0.129642	0.0539683	-3.06956	1.45852	6.26949e-07	5.06652e-06
EDEM2	8.40629	9.15865	25.388	28.2252	10.7062	9.94634	39.2122	40.1982	1.90866	5.51069	6.46107e-07	5.21723e-06
RAB3A	0.83729	0.959756	0.586928	0.341736	1.0949	1.05924	0.132065	0.150073	-2.86535	0.0211406	6.49979e-07	5.24435e-06
CAPN10-AS1	0.80994	0.879452	0.400102	0.39002	0.53311	0.455101	0.181104	0.0770395	-2.78937	0.773153	6.52174e-07	5.25543e-06
ZMYND8	3.61932	3.03259	1.19592	1.23872	3.85003	3.89333	0.722528	0.988172	-1.96198	3.68838	6.52377e-07	5.25543e-06
UBLCP1	18.8615	18.0651	10.8024	8.14689	13.7535	14.1484	3.99054	3.59425	-1.936	4.77424	6.71754e-07	5.40727e-06
PRMT5	6.13073	5.77608	23.0219	23.0722	6.88047	6.87457	29.8477	25.8974	1.91221	5.3824	6.73242e-07	5.415e-06
TMEM45B	13.6424	13.2352	3.11068	3.17533	11.9153	11.2228	2.56248	3.08746	-1.94828	4.0994	6.77195e-07	5.44252e-06
HECTD3	1.99192	2.09463	0.786107	0.9971	2.38436	2.60778	0.53289	0.574143	-2.05396	2.45288	6.94478e-07	5.57705e-06
AREL1	32.726	28.467	14.24	12.0301	17.9015	18.8603	7.05204	4.78607	-1.90316	6.53381	6.9514e-07	5.57799e-06
ZNF512	3.01276	2.52028	1.31529	1.02655	1.86301	1.68396	0.476752	0.435422	-2.09694	2.52544	6.95708e-07	5.57819e-06
PROSC	9.09032	9.33179	4.53035	3.69784	5.59234	6.58402	1.53689	1.40861	-1.98909	3.75094	7.05893e-07	5.65542e-06
P2RX4	2.34535	2.45851	2.58632	2.51976	1.61769	1.3213	5.52811	6.40833	1.98591	2.69061	7.06935e-07	5.65935e-06
CBFA2T3	18.9584	18.8784	6.93133	7.48923	20.047	20.026	5.67187	5.36014	-1.90303	5.82107	7.08605e-07	5.66829e-06
RAB20	4.03318	5.95411	19.9573	28.1155	8.20361	7.27025	27.9318	30.9393	1.91508	4.65592	7.16517e-07	5.72711e-06
DHX34	93.6766	100.832	60.8785	73.771	111.279	113.12	30.4312	30.0223	-1.89007	8.3906	7.22876e-07	5.77343e-06
SLC7A11	1.89416	1.54704	2.67328	1.96903	3.03336	3.03145	14.808	11.2863	1.89557	5.60131	7.37275e-07	5.88384e-06
C9orf40	1.63264	1.93085	0.807897	1.29236	3.16547	2.94078	0.650987	0.74676	-2.08351	1.95296	7.45753e-07	5.94688e-06
GVINP1	0.990537	0.845136	2.48379	1.88831	2.57082	2.40457	11.2553	9.57621	1.89721	5.1272	7.48938e-07	5.96763e-06
PITRM1	1.31283	1.2687	6.36274	6.08122	0.534305	0.718926	2.91949	2.20795	2.04679	3.22691	7.77263e-07	6.18851e-06
DBP	1.8373	1.96977	0.276656	0.384742	2.33296	1.88375	0.279442	0.493674	-2.24013	1.1317	7.90568e-07	6.28956e-06
GOLPH3	25.7044	22.8777	15.4862	10.5719	16.7039	17.3556	7.03906	4.44388	-1.91027	5.33081	8.25644e-07	6.56352e-06
AOC1	0.0191229	0.0354521	0.210498	0.189369	0.762778	0.939406	2.77366	3.14062	2.04154	1.33796	8.31367e-07	6.60389e-06
ELOVL1	23.9362	27.5809	13.0726	15.7155	27.4793	24.0923	7.41946	7.32878	-1.90667	4.89954	8.5962e-07	6.82303e-06
PAQR7	1.9906	1.67614	1.08483	0.91964	4.1791	3.94231	1.25979	1.04957	-1.99328	2.61513	8.6454e-07	6.85677e-06
FAM111A	8.2924	6.25099	17.88	12.793	9.81002	9.3147	43.0511	36.1145	1.88024	6.08525	8.72412e-07	6.91225e-06
APOL4	1.5541	0.98699	2.24676	2.2435	1.42617	1.71832	4.99135	5.47687	1.94114	3.14294	8.72885e-07	6.91225e-06
TNRC18	57.2065	59.4687	27.7555	31.3327	70.3914	80.2074	20.5511	19.2021	-1.87414	8.91819	8.74313e-07	6.91821e-06
PSMA5	2.97911	2.95976	5.98396	7.41025	4.51169	3.92296	15.7415	16.7555	1.89287	4.85001	8.75571e-07	6.92282e-06
WSB2	8.01392	8.84295	29.0462	25.3721	6.6741	6.95909	31.5888	24.7362	1.88996	5.6696	8.79733e-07	6.95036e-06
NCOA6	11.8525	9.3479	5.48485	4.40223	4.97446	6.3115	2.00948	1.32265	-1.91108	5.3361	8.92543e-07	7.04071e-06
TRIM27	16.7995	17.2207	38.9769	40.4372	13.273	12.1699	51.2021	48.7728	1.87757	6.47031	8.97312e-07	7.07289e-06
SLC25A3	26.2368	30.9841	13.7378	15.8003	24.3719	23.4078	5.60709	6.53049	-1.89993	5.13354	8.98159e-07	7.07412e-06
CCBL1	4.67422	5.08712	1.87245	2.28402	4.4718	4.06625	0.754868	1.11642	-2.00185	2.92817	9.01751e-07	7.09696e-06
TUBGCP3	3.86681	3.16717	1.56475	1.18946	2.25552	1.90767	0.572164	0.550754	-2.03382	2.8933	9.28427e-07	7.3013e-06
DICER1	17.2777	12.0491	9.55565	6.87827	17.9721	17.4671	5.73221	4.90575	-1.87321	6.89046	9.39992e-07	7.38658e-06
SLAMF7	3.05071	3.41171	9.43732	8.731	2.63867	3.18257	10.0191	9.91214	1.90934	4.18972	9.41479e-07	7.3926e-06
RNF25	4.0486	4.67135	2.40512	2.70994	5.13999	4.92608	1.22059	1.23919	-2.05219	2.37556	9.44111e-07	7.40758e-06
CDK13	8.95806	7.2791	3.77265	2.9608	4.26985	5.1731	1.54906	1.13317	-1.91377	4.93772	9.5025e-07	7.45004e-06
MFN2	73.1455	72.5537	40.8181	41.0025	34.2775	39.3155	13.9483	9.35867	-1.87288	7.56767	9.56007e-07	7.48945e-06
IYD	0.350296	0.394584	0.818852	0.75597	0.604	0.658628	1.78804	2.31114	1.93591	2.85493	9.60335e-07	7.51761e-06
LILRA1	35.6062	33.6452	9.70037	9.29985	22.7529	22.3843	6.98004	6.17808	-1.8808	5.91364	9.63051e-07	7.53312e-06
LPXN	7.2019	7.28117	2.33698	1.67534	4.70554	4.59	1.11946	1.15593	-2.02515	2.885	9.79158e-07	7.65327e-06
PDE3B	4.08035	2.89697	1.81749	1.10378	3.19172	2.98869	1.06649	0.834176	-1.93585	3.77958	1.00029e-06	7.81251e-06
KBTBD11	2.76568	2.3557	0.725102	0.529434	0.969404	1.01294	0.200332	0.22898	-2.08166	2.89375	1.01946e-06	7.95217e-06
FAM216A	1.81001	1.57754	0.235727	0.471527	1.38359	1.22111	0.277524	0.229526	-2.59062	0.506432	1.01973e-06	7.95217e-06
JKAMP	11.4389	10.341	4.79062	4.09265	10.3307	10.5677	4.48417	2.7558	-1.90636	4.43664	1.02238e-06	7.96414e-06
PCED1B	0.474318	0.623289	1.19294	1.70962	0.96609	1.16242	3.81883	3.85833	1.9976	2.01475	1.02282e-06	7.96414e-06
CTNND1	1.00954	0.825052	0.49401	0.453889	0.642121	0.589874	0.203096	0.136894	-2.22939	1.80863	1.05034e-06	8.17224e-06
TMEM154	244.175	173.163	84.8216	51.24	113.505	127.753	46.6431	31.3172	-1.85772	8.45467	1.09672e-06	8.52012e-06
TOB2	6.31749	6.44718	2.78879	2.7387	3.74497	3.72353	1.26338	0.977194	-1.93816	4.00244	1.10501e-06	8.57804e-06
ISCA1	9.21888	9.88087	9.58545	7.88737	5.53671	5.15985	20.6338	20.4529	1.88518	4.46832	1.11307e-06	8.63408e-06
RPS6KA1	137.612	150.397	107.646	121.463	165.53	167.591	51.3875	45.7927	-1.8539	8.56565	1.1359e-06	8.8045e-06
IDI1	18.1715	17.5426	104.918	88.8805	22.4549	23.2297	93.2989	81.3262	1.85669	6.90836	1.14776e-06	8.88969e-06
RBM8A	9.27169	9.12528	21.2671	23.1928	11.4308	10.9628	32.7602	41.3483	1.85489	6.6265	1.16066e-06	8.98287e-06
DNAJB2	12.5318	14.5594	4.17265	6.19674	14.9943	12.5999	3.45751	4.07488	-1.87956	4.82793	1.16402e-06	9.00204e-06
FAM122C	1.36122	1.03879	3.38663	2.50621	1.48432	2.07738	5.11654	5.67302	1.93423	2.83352	1.1683e-06	9.02836e-06
TRIM69	0.350676	0.207936	1.61099	1.45016	0.90237	0.888172	2.25124	3.67178	2.02449	1.44064	1.18929e-06	9.1836e-06
USP21	2.74894	2.54416	1.39314	1.14629	3.00897	2.94715	0.833183	0.727037	-2.04897	2.18969	1.20412e-06	9.29111e-06
MPEG1	227.768	190.452	43.537	33.96	91.5934	96.8841	31.6578	25.4126	-1.8497	8.7078	1.20642e-06	9.3019e-06
SENP7	3.88582	2.44776	2.14424	0.981397	2.80792	3.05768	0.926248	0.726084	-1.9512	3.41876	1.21246e-06	9.34138e-06
NAPSB	0.774486	1.58226	4.03699	4.68558	0.0294822	0.0520137	0.380504	0.523222	4.13878	1.0268	1.21729e-06	9.37157e-06
IER2	127.914	151.979	321.958	429.127	251.9	233.921	806.859	905.78	1.84631	9.68991	1.22285e-06	9.40731e-06
RAB5B	34.9601	31.8974	18.6202	15.5216	22.9255	24.0255	8.01349	6.33667	-1.85515	6.75999	1.22628e-06	9.42659e-06
ZNF471	1.82349	1.45848	2.86964	2.59158	1.71595	2.1239	4.93708	6.34005	1.88545	3.89083	1.23074e-06	9.45383e-06
DHX15	10.8636	9.51294	22.3854	16.3472	5.11369	5.80406	27.2622	18.6418	1.86608	5.45004	1.24065e-06	9.52281e-06
ZNF441	0.799024	0.575369	0.352888	0.179607	0.174639	0.244734	0.0445662	0.00609309	-4.82521	0.456469	1.2462e-06	9.55823e-06
ADNP	14.2886	11.1558	6.71444	4.57088	6.61195	7.49302	2.64831	1.79892	-1.87792	5.42842	1.24714e-06	9.55826e-06
CD40	0.318342	0.318109	0.940472	1.12726	0.266556	0.502041	1.39312	1.4113	2.4037	0.413151	1.25165e-06	9.58571e-06
CERS2	51.2236	50.8345	20.9757	21.9268	56.8344	55.5744	18.9659	15.7546	-1.85098	6.53808	1.26793e-06	9.70313e-06
PRDM10	4.22227	3.30011	1.48034	0.927583	2.13541	2.6464	0.469596	0.552811	-1.94956	3.6421	1.27417e-06	9.7436e-06
ATL3	0.816604	0.649006	3.22638	2.47389	0.348381	0.33188	1.83954	1.3586	1.96325	3.32809	1.29898e-06	9.91395e-06
CLCN6	1.06139	0.921617	0.438011	0.448474	0.391982	0.516594	0.152664	0.0699629	-2.48521	1.53551	1.29935e-06	9.91395e-06
ZNF8	1.45088	1.06347	0.441614	0.583294	1.0023	1.04458	0.406274	0.180384	-2.47325	0.808711	1.29935e-06	9.91395e-06
DUSP28	1.4011	1.33751	0.734532	0.474352	1.17546	0.743038	0.199468	0.17672	-2.73231	0.33413	1.32109e-06	1.00723e-05
SNRK	73.3462	56.3306	31.2019	17.985	33.2553	39.1082	13.6309	9.25289	-1.8456	7.48168	1.33282e-06	1.01542e-05
XYLT2	0.680577	0.819942	0.244648	0.380666	1.00942	0.938086	0.226023	0.213884	-2.23817	1.05522	1.34527e-06	1.02414e-05
LRRC37A2	2.64353	2.20485	1.91858	1.8357	0.79148	0.8885	2.9423	2.99675	1.9207	3.39563	1.34938e-06	1.02651e-05
LYRM1	8.44131	8.72961	30.1107	31.3813	15.066	15.0177	55.6327	54.2244	1.84763	5.63188	1.35701e-06	1.03155e-05
BRI3BP	2.17621	1.954	0.412556	0.515659	3.16207	2.26156	0.749872	0.683392	-2.20968	0.956659	1.36639e-06	1.03791e-05
NSD1	5.943	4.75806	2.3524	2.07205	3.0126	3.35329	0.838686	0.822468	-1.87295	5.23354	1.37172e-06	1.04119e-05
ARAP2	1.23824	0.719987	1.83571	0.99075	2.29712	2.53133	9.0627	8.3141	1.85572	4.63532	1.38279e-06	1.04881e-05
TMCC1	28.5612	23.0042	7.95774	6.81417	15.0096	15.9401	4.68225	4.16871	-1.8482	6.33596	1.39089e-06	1.05418e-05
LINC00664	0.438758	0.504103	0.25325	0.169014	0.942214	0.951752	0.469525	0.198251	-2.24825	0.915852	1.39345e-06	1.05534e-05
SEL1L	25.221	16.6089	10.8479	6.33353	12.2662	13.3007	5.21821	3.40938	-1.84709	6.52986	1.39658e-06	1.05693e-05
NFIC	15.9064	16.9982	11.0409	12.8353	20.8556	21.5483	5.70976	5.82739	-1.83951	6.80358	1.44071e-06	1.08952e-05
CEP19	32.3288	32.0395	15.261	16.2238	58.4515	59.5613	13.1296	16.3118	-1.84132	6.06641	1.44633e-06	1.09296e-05
SRF	11.4446	13.4569	26.0406	30.7515	9.55579	9.51874	35.167	34.1893	1.83909	6.48293	1.44912e-06	1.09426e-05
EPM2AIP1	3.74878	2.83267	2.15509	1.44725	1.09345	1.14152	0.42918	0.27335	-1.9999	3.61462	1.45516e-06	1.09801e-05
C3orf17	3.31828	3.10913	2.00549	1.40951	2.83704	2.84308	0.784257	0.745206	-1.92858	3.37806	1.45692e-06	1.09853e-05
ZXDC	7.25131	6.43412	2.83141	2.71528	4.07901	4.92542	1.60463	1.09107	-1.90241	4.22233	1.46693e-06	1.10449e-05
POLA2	0.794792	0.989717	1.68387	1.59369	1.11589	1.34067	4.1211	4.2035	1.91331	2.85927	1.46698e-06	1.10449e-05
TOMM34	0.996918	0.955048	0.476314	0.50951	1.45902	1.50183	0.451855	0.291267	-2.32399	0.803453	1.46896e-06	1.10517e-05
CBR4	2.42249	1.81246	1.0249	0.648232	1.2542	1.18445	0.320408	0.283668	-2.14414	1.98763	1.49492e-06	1.12388e-05
ZNF627	1.49763	1.1246	0.574984	0.298448	0.45886	0.703772	0.130549	0.0582049	-2.97662	0.910788	1.50442e-06	1.12936e-05
GPBP1	37.283	33.276	72.665	57.8414	31.3114	34.9345	136.259	111.381	1.83075	8.21722	1.50993e-06	1.13267e-05
PIGA	1.45116	1.36011	0.819286	0.349877	0.519351	0.632047	0.139567	0.0826171	-2.65094	1.30842	1.51825e-06	1.13807e-05
ZBTB48	14.7481	16.3531	8.48935	10.1003	14.0229	11.9052	3.63314	3.83767	-1.86944	4.61199	1.52703e-06	1.14382e-05
CLEC4E	49.2993	50.2604	87.0448	92.5647	98.9235	90.6287	300.254	351.208	1.82794	8.2393	1.55126e-06	1.16112e-05
AMPD2	314.145	344.891	211.021	245.662	370.941	378.752	105.949	104.553	-1.82695	10.0584	1.55959e-06	1.1665e-05
RCBTB2	17.6528	17.3037	39.4528	33.1286	13.0973	14.5224	59.7592	46.6221	1.83174	6.61731	1.57963e-06	1.18063e-05
EPT1	0.377712	0.375317	0.835777	0.723903	0.374567	0.390886	1.8731	1.42328	1.92581	2.69958	1.58391e-06	1.18297e-05
KPNB1	76.5067	67.3694	209.651	209.567	91.8227	104.346	312.819	325.098	1.82395	9.54325	1.61771e-06	1.20733e-05
ZNF768	2.25338	2.58702	0.647259	0.715647	2.34279	2.08723	0.569178	0.557391	-2.0712	1.78739	1.62678e-06	1.21321e-05
RBM33	22.1475	17.0316	11.3092	10.2451	17.0396	19.2917	6.28577	4.79584	-1.82903	7.12538	1.63323e-06	1.21714e-05
CDKN2AIPNL	0.568323	0.697866	0.854032	1.09312	0.854725	1.10796	2.01038	3.63634	2.08863	0.782216	1.64224e-06	1.22297e-05
ACOT9	38.6214	37.2358	92.13	87.542	39.5284	40.3914	154.108	140.143	1.82594	7.08701	1.64609e-06	1.22467e-05
ZNF12	7.20657	5.96357	3.87468	2.75977	4.07588	3.82268	1.63658	1.10123	-1.88794	4.27142	1.64767e-06	1.22467e-05
AGPAT9	26.5694	23.1619	7.9428	6.17782	15.686	16.0114	4.99458	4.33876	-1.8541	5.1572	1.64811e-06	1.22467e-05
RERE	41.9642	36.5367	147.065	146.484	41.4319	50.2877	212.316	146.373	1.82083	9.7184	1.68354e-06	1.25009e-05
YOD1	5.98484	4.01005	2.31054	1.47759	4.58168	4.97848	1.54844	1.25638	-1.86656	4.36517	1.7023e-06	1.2631e-05
FCGR2B	24.1299	23.8416	47.5504	43.3265	20.7616	21.8474	82.7789	73.5424	1.82465	6.51197	1.71711e-06	1.27317e-05
WDR37	12.079	10.7657	7.72053	6.12212	7.25075	6.63653	2.64064	2.00422	-1.85506	4.99427	1.7575e-06	1.30141e-05
STK16	2.48254	3.08381	1.31834	1.84145	3.45446	3.0772	0.826489	0.898434	-1.94286	2.73655	1.75774e-06	1.30141e-05
PRKD2	86.8133	94.5712	264.26	305.688	114.944	115.816	456.371	404.956	1.81683	9.6966	1.76558e-06	1.30628e-05
MALSU1	2.38525	3.21062	11.169	13.6646	2.88503	2.70349	9.67752	11.2233	1.95969	2.43138	1.79617e-06	1.32795e-05
C4orf27	0.37479	0.335523	2.1501	1.63118	0.274872	0.304264	0.899477	1.5704	2.5132	0.225468	1.80433e-06	1.33302e-05
DALRD3	2.98527	4.64282	1.55089	1.78973	3.72417	2.92791	1.43725	0.913071	-2.02791	2.17707	1.86774e-06	1.37887e-05
YEATS2	1.76587	1.5346	2.42034	2.4051	1.1794	1.25385	5.71702	4.26444	1.85426	4.06402	1.87411e-06	1.38258e-05
WIPI2	20.2029	21.2329	10.578	10.6398	23.7311	23.9513	7.1784	6.71484	-1.82134	6.17903	1.88139e-06	1.38695e-05
JDP2	20.9614	22.8799	5.42715	7.6003	47.3446	43.159	11.3813	13.4499	-1.8156	6.42547	1.91514e-06	1.41081e-05
RPAP3	8.20722	6.54214	15.8257	12.1545	10.6032	11.2549	40.2444	37.3467	1.81647	6.03441	1.92091e-06	1.41405e-05
KIAA1429	5.1126	4.15079	2.55616	1.78303	2.43167	2.25572	0.69576	0.654324	-1.89379	3.98698	1.92452e-06	1.41569e-05
SEC11A	27.8586	28.6343	12.9293	13.4237	38.7927	35.2223	8.85238	10.9015	-1.83124	5.09214	1.92645e-06	1.41609e-05
DPF2	36.011	38.4585	23.5322	24.7284	42.5722	41.3965	15.2215	12.0627	-1.81935	6.21026	1.93443e-06	1.42094e-05
KIAA0513	36.2098	35.8956	11.7301	11.7568	49.835	57.1667	15.9214	14.2132	-1.80992	7.8196	1.9768e-06	1.45102e-05
MIR1250	20.4844	22.8657	9.89779	9.78105	23.3556	21.4646	5.96445	4.62387	-2.33591	0.781779	1.98196e-06	1.45377e-05
RAB40C	4.19757	4.70731	2.38518	3.05816	6.05016	5.56315	1.40064	1.63153	-1.89068	3.30733	1.99461e-06	1.462e-05
CDIPT	13.8224	17.6472	38.5624	49.1123	23.5973	20.3776	80.5658	82.8617	1.81208	6.28205	2.00428e-06	1.46804e-05
LINC00957	4.20991	5.08929	1.51242	1.82562	3.5644	3.64998	0.671182	0.868954	-2.03608	2.21119	2.01315e-06	1.47348e-05
ERAP2	3.53314	3.03365	7.21221	6.28213	10.7498	11.7131	40.9408	37.6861	1.80972	6.42933	2.02192e-06	1.47877e-05
SBNO2	75.8514	89.3725	331.044	400.256	122.529	124.442	444.426	428.314	1.80555	10.2776	2.02326e-06	1.47877e-05
LOC100506746	2.16141	1.94783	5.66634	5.04171	3.10132	3.0084	9.08027	11.2463	1.85844	3.32911	2.0286e-06	1.48162e-05
IKZF5	8.35231	5.66787	4.41517	2.50572	3.78578	3.93638	1.51419	1.02905	-1.87921	4.19888	2.03702e-06	1.4859e-05
CHD9	1.7337	1.35011	0.563591	0.479419	1.53777	1.5511	0.398077	0.417174	-1.88205	3.53068	2.03736e-06	1.4859e-05
MKRN2	4.44572	3.96597	1.11058	0.696948	1.95751	1.71542	0.374483	0.470801	-2.05558	2.40497	2.0595e-06	1.50098e-05
ZC3H3	12.3426	13.1638	43.9732	51.3956	14.6083	14.4225	54.887	51.188	1.80901	6.71255	2.0716e-06	1.50872e-05
CLN5	2.64034	2.6394	1.06098	0.839699	2.47041	2.13751	0.590526	0.620077	-1.99404	2.20086	2.08507e-06	1.51715e-05
C7orf43	28.7856	33.6619	10.1836	12.0431	35.9421	32.1228	10.8732	10.215	-1.81497	5.79662	2.08613e-06	1.51715e-05
CTNNBL1	2.80266	3.58185	3.96852	5.02614	2.64676	2.75284	8.05855	9.61327	1.86074	3.32294	2.09001e-06	1.51794e-05
CPEB3	0.772425	0.622051	0.958695	0.567263	0.424258	0.481282	2.51637	1.61994	1.93279	2.55232	2.09018e-06	1.51794e-05
GNG10	90.9853	89.4408	433.828	394.351	171.203	171.631	651.917	597.535	1.80331	8.67254	2.10104e-06	1.52474e-05
LOC344887	0.440673	0.426729	0.823348	0.840313	1.90803	1.71389	8.70938	7.01117	1.87749	2.56899	2.11931e-06	1.53691e-05
EFNA4	0.975771	1.29275	0.360803	0.733045	1.83554	1.57063	0.402601	0.336848	-2.44517	0.292701	2.12839e-06	1.5424e-05
UBP1	5.02632	4.28394	2.88665	2.08882	1.90365	1.78172	1.05331	0.48437	-1.97442	3.34481	2.13914e-06	1.5491e-05
ODF3B	16.4094	22.535	70.6319	92.1656	94.5003	72.8954	247.053	329.542	1.80207	6.84154	2.17972e-06	1.57737e-05
MTMR10	33.9112	25.213	14.9496	9.60549	18.0014	19.774	6.30156	5.12818	-1.81158	6.3655	2.18308e-06	1.57869e-05
METTL3	4.56069	4.78575	2.99598	2.75877	2.81906	2.58804	0.859262	0.687161	-2.03625	2.49085	2.19695e-06	1.5876e-05
BRD7	7.62978	6.83863	19.1159	19.18	5.94281	6.03651	20.0822	21.021	1.82259	4.93606	2.20205e-06	1.59016e-05
DNAJC25-GNG10	75.5803	74.103	362.546	326.331	141.49	142.601	539.696	492.356	1.799	8.65734	2.21559e-06	1.59882e-05
ZBTB11	6.68486	4.52232	3.06222	1.70018	2.16176	2.72966	0.973576	0.571433	-1.91944	3.84656	2.22733e-06	1.60616e-05
RETSAT	2.60715	2.75555	1.39211	1.5182	2.28407	2.14579	0.795217	0.584227	-1.96683	2.55442	2.24452e-06	1.61741e-05
ZNF134	1.30534	1.40093	0.634859	0.718805	0.780288	0.74443	0.212671	0.122242	-2.6729	0.775403	2.2627e-06	1.62937e-05
KCNJ2-AS1	2.35899	2.22091	5.61198	4.61781	1.90381	1.63652	6.13208	6.91864	1.86153	3.26421	2.30004e-06	1.65509e-05
RNF113A	6.5973	7.87793	3.3341	4.33237	10.3518	8.96956	1.90058	2.79007	-1.89142	2.91238	2.31486e-06	1.66459e-05
TINCR	0.956114	1.14989	1.69912	1.6475	1.26022	1.29886	2.49705	4.58565	1.86338	2.82121	2.32091e-06	1.66777e-05
STRN4	96.3613	101.216	57.1641	66.0783	106.324	106.808	31.8657	30.6041	-1.79666	7.90303	2.33573e-06	1.67724e-05
RGS1	0.507967	0.404706	1.44037	1.54479	1.48681	1.39528	7.28226	5.73949	1.94854	1.80158	2.34081e-06	1.67971e-05
NUP107	0.982849	0.976618	3.2162	2.13212	0.360802	0.359155	2.29405	1.4993	2.05471	2.21402	2.34563e-06	1.68199e-05
RELA	47.6344	50.3739	105.214	102.956	50.3556	49.9149	218.033	174.648	1.79422	8.00865	2.37305e-06	1.70047e-05
ACTG1	359.284	414.968	231.054	259.32	379.26	352.585	123.735	109.471	-1.79264	9.19655	2.39717e-06	1.71655e-05
LOC100287846	0.745586	0.51199	1.06286	0.693121	0.694117	1.02906	1.69095	2.62584	1.91939	1.99858	2.40086e-06	1.71799e-05
EIF4ENIF1	9.18484	9.26095	3.70291	3.74228	5.43135	5.75776	1.69443	1.4998	-1.85648	4.22352	2.44095e-06	1.74546e-05
MAD2L1BP	5.46277	6.17574	22.4746	24.0172	9.2034	9.0216	31.2251	32.3287	1.81255	4.75886	2.44478e-06	1.74698e-05
RMI1	5.69751	4.41258	2.5018	1.15225	2.74496	3.40131	0.977835	0.723769	-1.92305	3.24609	2.47685e-06	1.76866e-05
HAVCR2	2.09076	2.55059	6.23582	5.25419	1.48068	2.0366	4.97615	5.434	1.87567	3.19463	2.48749e-06	1.77379e-05
CCR7	0.870277	0.915093	3.0157	3.57568	0.288839	0.433507	1.12773	1.30356	2.17362	1.82205	2.50335e-06	1.78386e-05
CLIC1	277.057	341.033	543.584	713.198	575.882	525.47	1592.16	1986.55	1.78642	10.3199	2.55178e-06	1.8171e-05
C9orf66	2.7404	2.90858	5.55833	6.23231	4.64051	4.2117	12.8585	16.271	1.80992	4.27206	2.6128e-06	1.85761e-05
MAT2A	13.3397	11.8765	4.77233	4.40368	7.91395	6.98891	3.07303	2.20912	-1.84087	4.36148	2.61498e-06	1.85761e-05
LINC00485	1.04506	0.542715	1.40541	1.1759	1.15589	1.46552	3.274	4.18997	1.85787	2.7328	2.61515e-06	1.85761e-05
DNAJC3-AS1	3.53861	3.39879	1.05533	0.886688	3.32055	3.49842	0.636616	0.879042	-1.91729	2.65538	2.61701e-06	1.85761e-05
CLPX	10.9618	10.0402	4.97063	4.43167	8.92664	10.0378	2.96499	2.47691	-1.84952	4.01385	2.61773e-06	1.85761e-05
POMZP3	7.39282	8.04887	2.81689	3.19942	2.82922	3.14567	0.542458	0.655859	-2.10861	2.48716	2.63916e-06	1.87152e-05
LSM14B	9.92329	10.038	3.52544	3.46536	7.998	6.97797	2.16939	2.22579	-1.84527	3.91351	2.64876e-06	1.87703e-05
BMX	2.46427	2.30432	2.06947	1.7326	1.75705	2.22651	7.53086	6.33958	1.85116	3.09665	2.66997e-06	1.88995e-05
ANAPC7	3.45533	3.58971	2.13762	1.82523	2.3867	2.27287	0.800349	0.610859	-1.96593	2.71087	2.67069e-06	1.88995e-05
GXYLT1	2.15596	1.48767	0.710698	0.575843	1.52216	1.35946	0.48617	0.407187	-1.90225	3.03479	2.68819e-06	1.90103e-05
GLRX	70.0641	78.886	147.964	171.669	200.261	180.743	625.009	688.983	1.78258	8.7991	2.69144e-06	1.90201e-05
TBKBP1	5.80257	6.69412	28.6937	37.411	10.7726	10.5877	34.5322	37.1972	1.78782	6.47154	2.69798e-06	1.90532e-05
HSPA1L	1.53791	2.22012	4.69981	5.7169	2.39217	1.99022	8.77049	8.53414	1.83487	3.51003	2.70925e-06	1.91196e-05
SULT1A3	10.2578	11.1506	4.13236	4.69479	21.9786	19.8234	5.45051	6.20741	-1.824	3.87376	2.72117e-06	1.91773e-05
SULT1A4	10.2578	11.1506	4.13236	4.69479	21.9786	19.8234	5.45051	6.20741	-1.824	3.87376	2.72117e-06	1.91773e-05
LOC101927153	7.03535	7.41346	1.3155	2.15572	9.8864	9.06757	2.34111	2.55002	-1.95477	2.03882	2.76298e-06	1.94586e-05
CA2	1.08095	1.21888	0.628577	0.430487	3.64282	3.64261	1.39563	0.908336	-2.00354	1.45255	2.77623e-06	1.95385e-05
KIAA0430	41.9837	30.1494	16.4428	12.8657	22.8097	24.9706	8.35626	6.62366	-1.78394	7.31582	2.82859e-06	1.98933e-05
ASNSD1	15.8425	14.4379	9.31338	6.62178	14.2317	14.3521	4.89358	4.05072	-1.81283	4.69553	2.84121e-06	1.99683e-05
ATF6	5.50422	4.47369	22.2716	17.7859	4.07626	4.22358	16.3777	14.056	1.78586	6.38807	2.85884e-06	2.00785e-05
IGHMBP2	1.28874	1.38719	4.44493	4.86137	3.50289	3.59309	11.5515	12.2038	1.80069	4.40515	2.86845e-06	2.01322e-05
MBD4	30.8566	27.5692	13.1579	11.9114	28.4755	29.1923	8.81111	8.22939	-1.79085	5.71073	2.88307e-06	2.02209e-05
FAM110A	17.2149	19.9771	9.85089	10.5722	33.5753	32.1207	8.19735	9.6737	-1.79524	5.09636	2.88534e-06	2.02231e-05
CASP3	7.54926	7.3637	17.3426	13.1435	6.36813	6.67171	25.2118	22.074	1.79339	5.14351	2.94324e-06	2.06026e-05
ARHGAP35	1.40145	1.30036	0.489207	0.429987	0.680749	0.897131	0.204926	0.170262	-1.99915	2.64233	2.94352e-06	2.06026e-05
ZNF91	0.746612	0.770827	1.64443	1.67115	1.19972	1.31262	3.13088	4.2468	1.82363	3.33956	2.95723e-06	2.06845e-05
RAB11FIP1	92.568	75.9245	34.019	28.9056	53.2768	59.9476	19.9848	15.5508	-1.77652	8.54451	2.9613e-06	2.06988e-05
NCK1	4.75007	4.00708	2.80968	2.41663	4.61144	4.8883	1.32598	1.29044	-1.8373	3.86584	2.97821e-06	2.08028e-05
TXLNA	2.63499	2.92247	10.4827	11.1028	1.9421	2.05632	8.24557	6.80752	1.80948	4.79268	2.98761e-06	2.08543e-05
GNG5	84.7223	99.4437	187.948	251.281	160.079	135.851	463.533	547.888	1.77509	7.60394	2.99553e-06	2.08953e-05
MEAF6	1.42653	1.45848	0.857058	0.712234	1.90192	1.96212	0.696261	0.50526	-1.91223	2.55657	3.01121e-06	2.09904e-05
KLF10	10.1817	7.87764	9.58855	7.0681	7.42295	8.08708	3.21427	2.09211	-1.82698	4.50148	3.02466e-06	2.10698e-05
TUSC2	18.5345	22.127	10.3943	12.2755	37.844	35.2205	8.12779	10.9448	-1.7898	5.03433	3.09505e-06	2.15309e-05
MORN3	0.602387	0.957416	1.60157	2.29493	1.05297	1.08436	3.43373	4.23726	2.00839	1.15757	3.12531e-06	2.17267e-05
USP3	29.2437	26.298	12.3173	9.56899	20.6172	21.1458	7.20207	6.01328	-1.77762	6.57537	3.16796e-06	2.20082e-05
CD38	0.40703	0.331352	2.00837	1.43991	0.112869	0.102438	0.846195	0.798981	2.82123	0.202177	3.18979e-06	2.21449e-05
GK3P	6.63023	5.34887	20.6628	14.9534	5.78405	6.55236	26.507	20.0321	1.79214	4.89361	3.2271e-06	2.2378e-05
KISS1R	2.77306	3.88975	1.17053	2.13816	5.05103	3.82708	1.10363	1.32757	-1.92764	2.12706	3.22774e-06	2.2378e-05
C6orf163	1.45057	0.991626	1.18551	0.800602	1.31688	1.51402	0.409552	0.210736	-2.64225	0.408109	3.25261e-06	2.25352e-05
GRPEL2	1.44751	1.01873	0.474934	0.239394	0.925914	0.904331	0.252812	0.21176	-2.12805	1.51504	3.32569e-06	2.30259e-05
ZNF564	5.91196	4.8879	3.27932	2.5504	3.19706	3.14695	1.083	0.857818	-1.89787	3.20599	3.35663e-06	2.32244e-05
LMO4	5.1278	5.71026	9.8929	11.4066	11.7272	10.6375	34.5707	39.9363	1.76783	6.44619	3.36069e-06	2.32368e-05
USPL1	5.95085	5.29999	13.4618	9.05667	4.44044	4.59796	21.3911	15.2723	1.78213	5.27807	3.3803e-06	2.33566e-05
GPX1	28.428	39.7381	11.183	15.1952	60.5267	48.6955	12.0903	17.6528	-1.77766	5.1117	3.40689e-06	2.35246e-05
TLR10	6.76578	5.94982	10.3148	9.40919	8.31917	8.25999	25.0893	28.3586	1.76926	5.67598	3.46656e-06	2.39204e-05
NSUN6	0.565467	0.469662	1.62717	1.30426	0.711224	0.930768	3.06079	2.68992	1.91901	1.87502	3.4861e-06	2.40229e-05
PRELID2	0.922798	0.872433	1.53907	1.70824	1.3742	1.14944	3.77658	4.80031	1.80449	3.35113	3.53233e-06	2.43251e-05
SLC4A2	2.72193	3.06994	5.8963	7.47621	4.14057	4.2411	13.1524	14.1302	1.77086	5.07815	3.62165e-06	2.49235e-05
ZNF652	16.3475	13.1338	4.72608	4.01154	14.2166	14.0069	4.35192	4.18813	-1.76319	6.75168	3.6537e-06	2.51271e-05
LINC00623	3.03429	3.62681	5.30706	7.67331	11.6308	10.0915	29.8404	39.4524	1.76215	5.64123	3.6977e-06	2.54127e-05
MRPS34	3.51504	3.63971	2.25177	2.75481	4.41408	3.0704	0.876822	1.0666	-2.04878	1.48949	3.70383e-06	2.54378e-05
AREG	0.191342	0.32938	0.299598	0.562063	0.507614	0.591182	1.80026	2.25362	2.14991	0.0865522	3.72068e-06	2.55364e-05
TMX2-CTNND1	1.15125	0.96791	0.58541	0.493752	0.696539	0.650011	0.26899	0.166799	-2.06176	1.97752	3.7544e-06	2.57506e-05
PPAPDC2	0.79731	0.656896	0.542847	0.398441	0.749754	0.746881	0.310793	0.142134	-2.3983	0.732096	3.78498e-06	2.59429e-05
LRRC37A	2.14329	1.85494	1.44996	1.65351	0.673634	0.733212	2.58979	2.41666	1.84289	3.13364	3.80038e-06	2.60311e-05
B4GALT4	1.42597	1.3016	2.56415	2.56278	0.842732	1.02764	2.73507	3.15005	1.90206	2.20145	3.80719e-06	2.60603e-05
IER3	242.663	275.689	207.809	248.045	446.03	429.958	105.399	132.22	-1.75419	8.33831	3.84572e-06	2.63065e-05
STK24	22.7151	20.5416	42.6071	37.7518	21.9967	22.1743	92.3916	74.2136	1.7544	7.59811	3.87242e-06	2.64714e-05
RC3H1	16.2751	10.9941	7.73528	4.61588	9.15453	10.1496	4.14434	2.7022	-1.76034	6.51636	3.96686e-06	2.7099e-05
TMEM219	7.47599	11.1139	17.1174	22.1443	20.6015	17.0986	54.2924	69.8982	1.76249	4.77921	3.99917e-06	2.73015e-05
SIK2	1.24804	0.995908	0.376755	0.409467	0.565603	0.681438	0.190485	0.125506	-2.17155	1.74271	4.00539e-06	2.73135e-05
ZNF574	3.6404	4.39413	2.01823	2.57746	2.9572	2.96301	0.581726	0.79977	-1.88644	2.97248	4.00627e-06	2.73135e-05
MIR6758	19.469	19.3543	12.853	14.626	31.6477	30.8073	4.47915	5.93458	-2.41391	0.189275	4.05411e-06	2.7617e-05
FAM174A	18.7851	18.8447	14.7933	15.8741	35.7105	31.7597	12.4971	10.4398	-1.77424	4.75069	4.05617e-06	2.7617e-05
ARL6IP6	1.0544	1.2101	5.3284	3.81688	1.21447	1.27814	7.5765	4.35701	1.84292	3.19278	4.05924e-06	2.76196e-05
TNFRSF9	6.96082	6.38987	2.55619	2.15429	5.37256	5.33479	1.58808	1.55857	-1.78535	4.58236	4.11353e-06	2.79704e-05
COX17	7.72316	9.59567	13.7598	20.0921	16.0475	12.7268	42.2152	55.6936	1.79512	3.2363	4.16678e-06	2.83137e-05
ARHGAP19	3.09764	2.36253	0.750109	0.634034	1.55163	1.58009	0.470254	0.416268	-1.89806	2.90527	4.22832e-06	2.87128e-05
ZBED1	4.9945	5.177	7.60396	8.5612	4.22858	4.57904	15.6096	14.302	1.75795	5.22235	4.26431e-06	2.8938e-05
OSBPL2	56.3171	53.5434	31.0496	29.1552	47.7456	49.9099	15.403	14.2077	-1.74869	7.21998	4.29404e-06	2.91204e-05
ATXN7L3B	4.84425	4.30079	2.34826	2.01979	3.1657	2.98709	1.35354	0.875177	-1.85478	3.33962	4.32878e-06	2.93367e-05
PRDM5	0.630528	0.404911	0.315645	0.210447	0.389979	0.503436	2.21353	1.44985	1.89428	2.03923	4.43024e-06	3.00044e-05
BBX	2.49716	2.20412	3.92085	3.34061	2.86273	2.86111	9.29979	9.63371	1.75069	5.36921	4.4583e-06	3.01745e-05
BCORL1	5.90678	5.77121	2.28165	2.52664	4.92321	5.99907	1.60732	1.43952	-1.77398	4.80863	4.48939e-06	3.03649e-05
COX7C	10.2548	11.03	15.8177	22.4878	13.4616	11.5026	35.6923	46.7457	1.79593	3.09049	4.49606e-06	3.03899e-05
PLEKHJ1	12.0556	14.9051	5.70906	8.92821	13.843	10.7303	2.99624	3.93654	-1.81408	3.47891	4.57112e-06	3.08769e-05
TFG	7.54705	7.61521	29.0407	24.82	11.2712	10.8116	44.119	37.9026	1.74964	5.488	4.57601e-06	3.08896e-05
ALPP	0.540016	0.584188	0.975931	1.09385	0.950381	0.805141	2.44986	3.41903	1.84689	2.01366	4.57964e-06	3.08937e-05
LOC100131347	0.637034	0.502325	0.608858	0.931415	0.640996	0.726021	1.82219	2.45112	1.93483	1.27509	4.59704e-06	3.09907e-05
MED26	3.58455	3.59901	1.85039	1.8995	2.20722	2.19989	0.826935	0.584191	-1.91754	2.74725	4.61129e-06	3.10664e-05
ARAP3	72.0133	70.2439	32.1237	37.1233	129.21	133.105	41.4627	38.732	-1.73812	8.50956	4.64081e-06	3.12447e-05
ZNF296	0.611356	1.01683	2.00785	1.9203	0.908333	1.05516	2.68355	3.46861	1.93284	1.45064	4.68064e-06	3.14921e-05
ARHGAP18	6.84266	4.88056	2.06387	1.55338	5.08089	5.71762	1.83224	1.45188	-1.8071	3.69111	4.73456e-06	3.1834e-05
PTGES	9.58376	10.6638	1.64912	1.43	6.71879	6.3137	1.70831	1.87255	-1.8431	3.16577	4.74832e-06	3.19056e-05
MSRB2	3.18927	3.87037	8.19676	11.9899	8.99196	7.38349	23.1345	30.3378	1.75439	4.45932	4.79446e-06	3.21859e-05
DENND4C	0.619287	0.41363	0.714722	0.547635	0.398874	0.522066	1.53205	1.42492	1.83678	2.61527	4.79842e-06	3.21859e-05
SLC5A3	1.50468	1.12446	0.245375	0.193499	0.928285	0.921826	0.142259	0.258064	-1.84673	2.95962	4.79946e-06	3.21859e-05
PPP1R3D	18.8252	16.9219	8.61982	5.76976	9.84289	10.8925	3.73906	2.88786	-1.76905	5.07146	4.82893e-06	3.23623e-05
LY96	36.5716	42.1792	147.429	176.817	89.533	74.8929	278.265	298.691	1.73816	6.45931	4.83663e-06	3.23928e-05
CALM2	52.5194	50.7487	67.9059	65.6897	51.8275	50.7437	186.362	172.227	1.73252	8.64382	4.93755e-06	3.30471e-05
MSL3	8.08505	6.75056	18.4378	15.0699	6.35822	6.7488	27.5811	21.2911	1.74354	5.60342	4.95087e-06	3.31146e-05
SLC10A3	5.65911	6.79883	1.66042	2.55297	6.82738	6.21085	1.69756	1.93819	-1.81655	3.17876	4.98022e-06	3.32892e-05
AVL9	12.1555	9.30739	7.23373	4.95831	7.18823	7.59796	2.62656	2.12846	-1.7558	5.55534	4.99571e-06	3.3371e-05
TMEM55A	30.2096	27.9067	13.4903	12.0194	40.1413	38.6884	13.0212	12.0096	-1.74089	5.81662	5.03101e-06	3.35849e-05
CLDN16	0.785721	0.796949	1.62594	1.66064	1.3979	1.71117	3.23276	4.85931	1.79742	2.72171	5.1119e-06	3.40805e-05
FRMD8	49.633	53.8453	39.9676	44.8083	62.7619	62.6452	23.5693	18.8867	-1.73252	7.38385	5.13989e-06	3.42447e-05
PER1	9.17657	10.359	3.35909	3.7523	13.9329	15.0511	3.98823	4.16123	-1.7434	5.23223	5.19386e-06	3.45818e-05
BAG4	3.21016	2.28065	1.52196	0.8973	1.33888	1.28458	0.558476	0.350096	-1.93499	2.68533	5.20271e-06	3.46183e-05
LINC01003	3.21145	3.92636	1.85532	2.15613	6.70575	5.81892	2.02871	1.84805	-1.85927	2.30454	5.23385e-06	3.48029e-05
WBP1L	23.516	22.484	12.6166	11.727	17.1429	19.4986	5.30333	5.12816	-1.74109	5.95451	5.24238e-06	3.4837e-05
MFSD12	8.26232	10.6069	14.9279	18.4549	16.4887	15.0218	49.1034	54.831	1.7335	5.64705	5.28856e-06	3.51175e-05
GAPT	29.1903	24.1745	5.76785	4.94427	32.9901	36.4505	10.2295	9.88456	-1.73877	5.5552	5.29144e-06	3.51175e-05
ADAMTSL4	2.63312	3.38725	15.0904	16.3241	2.49583	2.82637	8.79818	8.42902	1.75582	5.01959	5.30241e-06	3.51675e-05
SPINT1	6.18328	6.24674	1.33516	1.65208	3.79469	2.97307	1.17737	1.04219	-1.86423	2.92567	5.30636e-06	3.51709e-05
NSL1	0.859898	0.858443	1.8881	1.70274	1.09232	1.05318	3.30042	3.67067	1.74863	4.57649	5.32256e-06	3.52555e-05
SDHAF1	2.16689	2.71931	0.589968	0.995299	2.82261	2.55828	0.397966	0.637184	-2.14677	0.903565	5.46552e-06	3.61791e-05
FEM1A	4.46317	5.07572	3.39218	3.67214	3.40645	3.66548	1.31834	0.967169	-1.81634	3.64605	5.53761e-06	3.66326e-05
NDUFAB1	1.77092	2.27039	6.44764	6.21967	1.524	1.23118	6.54881	6.13095	2.00792	1.43411	5.57724e-06	3.6871e-05
IVD	2.25865	2.25353	3.94055	4.208	3.11526	2.97023	7.69124	10.4181	1.74165	4.42716	5.7023e-06	3.76734e-05
PRKD3	1.57528	1.11679	0.680381	0.377602	0.92206	1.08769	0.365505	0.239615	-1.94391	2.24569	5.78187e-06	3.81745e-05
MIF	7.14344	13.7213	20.0686	27.0913	16.9646	12.9622	41.3088	57.0938	1.75078	3.78561	5.84075e-06	3.85384e-05
STK17A	59.4679	57.0171	34.9059	31.8033	84.1389	80.6176	27.0752	25.545	-1.71973	7.62186	5.88794e-06	3.88248e-05
ZNF384	19.2042	17.744	12.9697	12.1382	13.0239	12.8037	5.71696	3.88318	-1.74583	5.30516	5.89758e-06	3.88492e-05
DCLRE1C	3.56666	3.28159	9.46264	9.02515	4.87859	4.89918	15.8398	16.1258	1.72483	5.82341	5.8997e-06	3.88492e-05
LINC01506	32.4301	47.3918	75.6459	112.429	131.185	95.3715	297.003	432.878	1.72235	5.7478	5.90479e-06	3.88492e-05
RNF138	10.1019	7.86187	30.1536	17.3758	8.81238	9.65305	46.4	29.1346	1.72512	6.15364	5.9068e-06	3.88492e-05
NUDT16P1	1.05605	1.06971	3.79445	3.3599	1.07499	1.06023	4.30368	3.8305	1.83308	2.51774	5.9991e-06	3.94309e-05
ABAT	7.6628	6.57156	2.89548	2.51601	4.15311	4.25756	1.303	1.21984	-1.76746	4.41962	6.03965e-06	3.9672e-05
GSTO1	11.2696	12.6091	27.1643	38.2814	29.3101	25.6623	82.3699	96.6441	1.72128	5.41737	6.19169e-06	4.06446e-05
TBC1D7	4.39806	5.19865	2.86502	2.31049	6.85232	6.08438	2.38484	1.90569	-1.84615	2.41991	6.20569e-06	4.07105e-05
RNF135	7.5443	8.26826	16.4101	17.7023	7.84201	7.28033	28.3899	25.9981	1.7291	5.05158	6.40497e-06	4.19908e-05
GPR107	13.8948	12.0952	6.27096	6.24197	9.76198	10.9721	3.98977	2.95394	-1.72452	5.87282	6.4166e-06	4.20402e-05
FRY-AS1	0.951172	0.83088	0.361701	0.414646	1.47926	1.43239	0.331614	0.356331	-2.05318	0.902293	6.48093e-06	4.24345e-05
IRAK2	9.58127	9.77045	17.8744	15.768	10.1374	11.5094	42.1361	33.296	1.71566	6.02449	6.53365e-06	4.27524e-05
THAP1	4.63214	4.31236	2.94893	2.21602	3.9834	4.21172	1.26668	1.10983	-1.84353	2.75078	6.53781e-06	4.27524e-05
EMC9	0.763005	1.01861	4.09812	4.06325	1.74737	1.78402	3.4884	6.52896	1.90144	1.30686	6.56122e-06	4.28781e-05
GID8	9.07832	9.58877	5.89039	6.24739	7.56461	7.21436	2.30789	2.26097	-1.74229	4.79695	6.58825e-06	4.30273e-05
REV3L	1.97833	1.56915	1.15636	0.706796	1.23273	1.24402	0.39455	0.35595	-1.79203	3.58497	6.64363e-06	4.33613e-05
C9orf69	4.17104	5.24634	1.49493	2.83657	3.62391	3.36661	0.98449	1.01947	-1.82962	3.02443	6.67001e-06	4.35058e-05
KCTD7	2.31644	2.29548	0.578744	0.724278	1.23439	1.14853	0.393842	0.329025	-1.90733	2.52271	6.72046e-06	4.3807e-05
ZNF281	22.5443	20.2346	7.9842	5.67675	17.3351	18.636	6.22709	5.27861	-1.71546	5.9902	6.90114e-06	4.49561e-05
POLR3K	1.59858	2.12126	0.608038	0.597721	2.86722	2.74075	0.783977	0.604038	-2.24623	0.348566	6.91624e-06	4.50166e-05
LINC01215	1.1146	0.968392	0.752161	0.426412	1.31699	1.43221	0.432774	0.316256	-2.05767	1.15949	6.91921e-06	4.50166e-05
SLC35A4	6.72545	6.95402	20.5175	20.8501	5.12463	4.83248	24.1887	16.925	1.72361	5.2827	6.97313e-06	4.53386e-05
SEC23A	4.47059	3.76751	1.9172	1.28213	2.14653	2.48927	0.823922	0.593895	-1.85358	3.07838	7.00015e-06	4.54855e-05
APAF1	17.3608	13.6112	3.80463	2.51683	9.74961	10.0002	2.63502	2.97297	-1.71342	5.81678	7.28184e-06	4.72858e-05
FPGT	2.16737	1.69525	1.18735	0.835297	0.96113	0.747237	0.249411	0.247038	-1.95972	2.26989	7.32417e-06	4.75305e-05
DLST	13.1097	13.3707	7.42913	6.82099	12.6139	12.4315	4.58956	3.80083	-1.7306	4.72207	7.34132e-06	4.76117e-05
LOC102724297	0.479226	0.260977	0.9014	1.22664	1.43728	1.10952	4.38713	5.39398	1.90776	0.865984	7.41667e-06	4.80396e-05
FAM213B	5.34325	5.51935	2.44354	2.98257	2.46464	2.36961	0.752642	0.67501	-1.86823	3.00428	7.43732e-06	4.81429e-05
C20orf24	112.066	134.822	196.396	243.546	183.494	157.049	510.662	595.164	1.69755	8.35167	7.47316e-06	4.83444e-05
ZNF174	2.02705	2.20811	1.23419	1.38231	1.17382	1.05045	0.36146	0.270176	-2.11873	1.61413	7.53444e-06	4.87101e-05
RRP36	12.6772	14.7131	7.54211	10.0821	10.7889	9.77801	2.68224	3.12228	-1.78879	3.37693	7.64407e-06	4.93731e-05
SCARNA7	3.9458	5.40847	4.10886	10.5288	15.7086	10.3884	27.1444	52.9243	1.75231	2.42982	7.64665e-06	4.93731e-05
PRDX1	2.16799	2.36092	2.32854	2.03608	3.37625	2.51876	0.772337	0.844261	-1.99934	1.3642	7.68723e-06	4.96039e-05
WDR81	1.11588	0.984625	0.390998	0.505824	0.800308	0.800758	0.322198	0.213095	-1.90883	2.15534	7.69641e-06	4.96319e-05
LSM10	62.0389	77.7908	84.4882	125.238	114.897	100.145	288.853	372.137	1.69549	7.15011	7.78081e-06	5.01229e-05
ANXA1	20.0449	20.1855	69.3106	63.7618	21.8865	24.1657	78.9474	71.1662	1.70114	6.14892	7.78232e-06	5.01229e-05
TRAPPC11	4.26183	3.51776	1.9977	1.36394	2.46641	2.55824	1.11895	0.707598	-1.80131	3.36302	7.80177e-06	5.02165e-05
GAPVD1	10.1795	7.85515	7.11172	4.9605	4.90641	5.38792	1.77467	1.48315	-1.72597	5.2708	7.83672e-06	5.04099e-05
HSP90AA1	43.653	44.2852	158.001	154.931	54.9536	56.3351	164.462	177.681	1.693	8.69622	7.88908e-06	5.07148e-05
SCNN1A	0.282886	0.212555	0.928455	1.28564	0.276124	0.399134	1.15835	1.08937	1.97976	1.30606	7.92207e-06	5.08949e-05
ATG2B	1.76908	1.38134	0.751203	0.528352	1.11167	1.11742	0.348168	0.321577	-1.7894	3.35267	7.98193e-06	5.12474e-05
C4orf33	5.55622	5.75464	13.489	10.0873	4.04388	3.61115	14.5428	13.431	1.73171	4.038	8.11626e-06	5.20772e-05
RALB	92.4882	91.4062	283.844	282.295	141.596	147.936	498.466	456.692	1.68943	9.13898	8.18351e-06	5.24759e-05
LRRC4	42.761	44.0817	17.8735	20.7999	65.2578	69.8489	20.6783	20.1866	-1.69275	7.12667	8.19294e-06	5.25035e-05
ST3GAL4	20.8865	23.2635	97.2571	120.937	25.9764	25.1131	77.6051	83.9626	1.69254	6.92979	8.30468e-06	5.31863e-05
FAM229A	3.50609	5.1913	2.89105	3.0714	5.93881	5.1674	1.08432	1.49165	-1.99294	1.33413	8.33051e-06	5.33184e-05
LRMP	110.686	99.5089	42.711	37.2263	64.7352	69.6368	21.1386	20.0307	-1.69233	7.38414	8.35804e-06	5.34612e-05
CDC42EP2	33.0227	43.8555	98.3707	116.804	66.3488	63.6419	184.5	213.673	1.68726	7.6965	8.51432e-06	5.44268e-05
CTDSP2	113.621	105.494	60.8633	49.6867	69.6115	75.3685	30.5447	21.6518	-1.68484	8.36912	8.84725e-06	5.65198e-05
ZFYVE1	9.57614	8.98206	6.03248	5.14758	8.46908	8.92174	3.00341	2.58116	-1.71416	4.88965	8.87604e-06	5.66684e-05
KIAA1109	4.27081	3.1951	8.24115	5.30988	4.29304	4.34352	20.5521	13.8076	1.68539	6.96166	8.91753e-06	5.68979e-05
FUT7	9.68652	13.1035	9.26768	12.5485	11.3213	10.842	2.13407	3.4281	-1.72353	4.45091	8.93019e-06	5.69432e-05
IRAK3	8.59966	6.51831	4.6352	3.08504	4.6345	4.98806	1.70237	1.41468	-1.71191	5.21407	8.94799e-06	5.70212e-05
HECW2	0.936219	0.745572	0.298548	0.144794	0.676382	0.87354	0.109402	0.175527	-1.94587	1.79876	8.96477e-06	5.70572e-05
CHST1	0.295962	0.247073	0.627421	0.482695	0.318838	0.395051	1.41407	1.20136	1.91351	1.30643	8.96477e-06	5.70572e-05
DHRS7	100.038	111.39	43.4241	50.3862	191.81	181.215	53.916	59.6775	-1.68441	7.10257	8.98664e-06	5.71608e-05
XIAP	15.1462	12.9884	29.4798	25.6838	16.3648	16.6208	54.2293	52.4708	1.68092	7.88005	9.16139e-06	5.82362e-05
PAPD7	1.58205	1.57024	2.07333	1.86267	0.793394	0.866259	3.94364	2.71431	1.77437	2.8991	9.40436e-06	5.97437e-05
TXNDC9	7.95352	7.73075	5.27868	4.03304	5.96726	5.86692	1.46481	1.70141	-1.81021	2.94404	9.44903e-06	5.99902e-05
PSME2	22.8466	24.5737	106.937	123.339	120.894	102.348	317.126	387.057	1.6788	6.96459	9.47464e-06	6.0085e-05
STAT5A	46.8462	49.5071	130.454	145.915	75.0117	77.4848	254.108	239.834	1.67685	9.13072	9.47568e-06	6.0085e-05
LINC00869	1.01312	1.18524	1.92869	2.45443	3.79846	3.48665	10.0833	12.2279	1.68667	4.777	9.63073e-06	6.10304e-05
BET1L	13.4835	14.585	12.0351	12.1616	15.9015	16.1978	5.88947	4.89441	-1.69993	5.1375	9.63987e-06	6.10505e-05
CMTM3	20.4726	23.4998	12.374	13.8424	40.5442	39.9149	11.7116	12.6198	-1.6838	5.67259	9.8156e-06	6.21046e-05
PTPN1	12.9595	14.612	26.4205	25.636	9.4145	10.6898	35.22	30.1929	1.68125	6.20116	9.81844e-06	6.21046e-05
TFAM	1.5515	1.23224	2.19425	1.38135	1.2334	1.46646	4.9835	4.06491	1.72053	3.6057	9.93293e-06	6.27901e-05
DLX6-AS1	3.57075	2.58946	6.52867	6.9291	2.82733	3.35186	7.90459	9.3614	1.72723	3.4244	9.9625e-06	6.29382e-05
MIR4632	24.5671	33.6924	17.1674	20.4628	36.615	26.6122	15.1779	7.75341	-2.23879	0.516845	9.98314e-06	6.30297e-05
VILL	1.73075	2.0739	3.00864	3.29134	0.516906	0.606455	1.81833	1.88501	1.86637	2.38767	1.01092e-05	6.37862e-05
ZNF682	0.429586	0.556531	0.748612	0.841402	0.719449	0.808422	1.65001	2.51092	1.80311	1.73818	1.01725e-05	6.4146e-05
HNRNPR	3.7768	3.27891	7.8605	8.28996	2.33346	2.38978	7.94616	7.51653	1.68758	5.41106	1.01817e-05	6.41646e-05
LEPROTL1	12.6124	10.7072	3.93246	3.66101	10.3017	9.59517	3.45776	3.14275	-1.71275	4.28611	1.01966e-05	6.42189e-05
LOC103091866	2.03754	2.12222	2.97204	4.29708	4.96951	4.32017	12.8884	16.2764	1.71157	3.18448	1.02732e-05	6.46618e-05
AKAP10	17.5189	15.3347	11.7567	8.02323	14.3929	15.0413	6.5265	4.46305	-1.68924	5.51999	1.03334e-05	6.50008e-05
OTUD5	51.3978	54.8205	108.329	122.353	67.7826	65.7269	218.852	215.502	1.66871	8.36992	1.04831e-05	6.59021e-05
TMEM192	1.16389	1.44995	3.09637	3.58107	2.22393	2.1903	5.10576	7.2248	1.69982	3.87291	1.05598e-05	6.63433e-05
KLHL17	0.401742	0.370078	1.71434	2.06408	0.684122	0.541882	2.62045	2.43538	1.83164	1.8034	1.07023e-05	6.71976e-05
MEF2C	22.2942	17.9079	4.3006	2.93447	7.95579	8.29511	2.34298	2.47003	-1.68746	5.7863	1.07602e-05	6.75195e-05
DYX1C1	0.69126	0.728995	0.310968	0.165141	1.32423	1.14993	0.211798	0.299451	-2.14418	0.334953	1.08582e-05	6.80932e-05
KRAS	24.746	16.7478	12.0655	7.26293	9.00255	9.76507	2.96099	2.79746	-1.6862	5.97442	1.08782e-05	6.81353e-05
PRKAR1A	112.952	83.9993	61.0247	34.9336	50.138	56.5332	24.4247	15.7716	-1.66857	7.94922	1.0884e-05	6.81353e-05
PECAM1	101.866	95.9084	54.417	53.9768	88.5459	91.3263	29.18	27.8908	-1.66663	8.2401	1.08849e-05	6.81353e-05
DCUN1D1	8.06956	5.58111	3.599	2.0464	5.14955	5.39542	2.31161	1.59458	-1.69125	5.05065	1.09233e-05	6.83341e-05
ZBTB38	0.997164	0.64835	0.405317	0.260945	0.543523	0.594269	0.30737	0.14209	-1.93526	2.04673	1.09644e-05	6.85493e-05
RAB12	1.61284	1.43276	3.411	2.72373	2.82998	3.01041	13.1299	9.29265	1.71525	3.32515	1.103e-05	6.89174e-05
NEU1	9.6634	12.0506	5.83759	7.5161	16.8469	15.2117	4.73068	5.20385	-1.6948	4.32142	1.10703e-05	6.91272e-05
RNPEPL1	43.444	53.4938	18.0826	22.4082	43.8817	41.2756	14.012	13.7891	-1.67008	6.56233	1.10924e-05	6.92229e-05
KIF27	4.91592	3.72846	1.19064	0.932649	4.44817	4.49467	1.14641	1.35282	-1.71719	3.70771	1.1348e-05	7.0775e-05
ALDH9A1	19.8725	18.5975	10.6872	8.43219	14.0445	15.4156	5.32936	4.3406	-1.69401	4.91987	1.13709e-05	7.08747e-05
CHMP1B	78.2118	71.2108	35.1016	33.8481	97.9231	95.207	32.9248	30.9144	-1.66337	7.50671	1.14092e-05	7.10699e-05
MED27	0.807293	0.849138	1.33501	1.48233	1.18116	1.07062	3.86034	4.22678	1.83916	1.39249	1.14883e-05	7.15193e-05
EEPD1	17.5553	18.7663	4.91511	5.71345	14.3209	14.537	4.66374	4.48728	-1.6742	5.63878	1.15231e-05	7.16922e-05
AP5B1	50.6056	56.5101	171.304	192.967	72.0222	77.5117	243.751	227.225	1.65761	9.81403	1.18074e-05	7.34168e-05
CYFIP2	37.1539	35.5577	17.2095	16.3739	28.1231	29.2032	9.85967	8.88756	-1.66189	7.23908	1.1882e-05	7.38357e-05
SLC14A2	1.32824	1.29345	2.21811	2.28634	2.37041	2.35746	5.06555	7.64312	1.689	3.67568	1.1899e-05	7.38788e-05
INAFM1	9.67629	12.0905	37.0812	51.2711	18.5962	15.2005	48.9356	59.462	1.67694	4.72697	1.19034e-05	7.38788e-05
FLJ44635	3.42476	2.90493	1.393	1.07221	1.39882	1.59926	0.469713	0.339442	-2.04254	1.85756	1.19115e-05	7.38846e-05
DMXL2	8.64438	7.5819	3.31394	2.18162	9.7567	9.49197	4.18523	3.0757	-1.66547	5.99876	1.19865e-05	7.43044e-05
CDKN1B	91.78	83.7209	61.4593	53.1113	103.349	110.269	41.058	32.7163	-1.65944	7.50849	1.20071e-05	7.43606e-05
DUSP18	9.57886	9.31869	4.23524	3.75062	8.71926	9.18451	2.73059	2.68623	-1.69859	4.33968	1.201e-05	7.43606e-05
KLHDC3	9.02148	10.4309	4.90585	5.56505	7.1523	6.8546	1.70606	2.14811	-1.73526	3.5978	1.2092e-05	7.48229e-05
ARMT1	7.80453	6.093	4.04239	2.79427	4.43545	4.71324	1.67809	1.31408	-1.75493	3.42536	1.22443e-05	7.57193e-05
SIRT7	40.1125	45.7	24.1738	30.2783	64.087	59.1432	18.0924	20.2493	-1.66215	6.0302	1.23565e-05	7.63673e-05
ZNF319	6.17709	6.31734	6.30163	6.21841	3.98901	4.89007	1.85034	1.20941	-1.72167	4.28838	1.24641e-05	7.69858e-05
NCF1	415.955	469.75	700.357	838.949	492.561	432.427	1362.83	1548.26	1.65227	10.1572	1.2528e-05	7.73341e-05
TGIF2-C20orf24	104.509	121.532	190.328	226.958	168.276	145.561	462.429	529.257	1.65314	8.05285	1.25661e-05	7.75223e-05
OSGEP	9.03247	8.44378	4.16633	4.16176	7.42264	7.16937	2.1886	2.21166	-1.74671	3.19314	1.26764e-05	7.8156e-05
CLEC4GP1	2.99271	2.87271	4.87337	6.05996	5.02324	5.32988	9.85034	16.1432	1.6842	3.68676	1.27418e-05	7.85119e-05
FKBP15	11.1999	10.7256	7.42701	6.94376	10.9554	11.5167	3.71816	3.4338	-1.67374	5.1608	1.294e-05	7.96852e-05
AGAP3	5.6731	6.73072	2.67715	2.90694	9.94523	9.95502	2.70536	3.0995	-1.68194	4.28007	1.29552e-05	7.97312e-05
GSK3A	47.7907	53.8944	30.3199	37.1102	55.3535	50.4269	16.0294	17.5525	-1.65699	6.39345	1.29983e-05	7.99482e-05
WDR31	0.284275	0.344169	0.436659	0.449016	0.420178	0.454213	1.07257	1.57189	1.90312	0.678088	1.31638e-05	8.09176e-05
LOC284865	0.93081	0.829034	3.40264	2.88085	1.17681	1.51686	4.73859	4.00514	1.76686	2.44435	1.32389e-05	8.13306e-05
TLR9	5.65165	5.7182	3.30803	3.78997	13.318	13.3396	3.4572	4.1929	-1.66734	4.67653	1.34319e-05	8.24664e-05
FOXO3B	7.69981	6.59127	2.01878	1.77576	6.21627	6.51547	1.554	1.95215	-1.67096	4.96317	1.34909e-05	8.27793e-05
TGFBRAP1	0.753038	0.785612	0.301272	0.208861	0.503336	0.544423	0.128445	0.12245	-2.03884	1.27938	1.3512e-05	8.28593e-05
FBXO42	4.60863	4.20966	2.0142	1.93544	3.52097	3.20979	0.98287	1.0844	-1.69903	4.07582	1.35618e-05	8.31147e-05
CHST15	168.961	147.77	61.0633	55.3205	89.5891	95.561	27.3995	28.6039	-1.64711	8.66639	1.35917e-05	8.32483e-05
CLK4	21.1674	18.678	14.2189	9.69588	16.3001	15.3259	6.18518	5.1189	-1.67095	5.06517	1.37112e-05	8.38995e-05
MITD1	15.3156	14.011	38.5722	37.3279	19.9416	18.5688	60.1866	63.0974	1.66178	4.92574	1.37144e-05	8.38995e-05
LTBR	31.3813	36.7007	128.181	160.309	64.5638	58.1301	188.088	201.96	1.64527	7.94527	1.38169e-05	8.44762e-05
PAF1	24.4353	26.1394	61.7354	72.7546	31.3998	30.2175	87.6512	98.2681	1.64596	6.95124	1.40212e-05	8.56227e-05
MR1	5.25357	5.01753	13.8287	12.2187	7.46526	7.74796	24.9379	23.374	1.64664	6.61642	1.40527e-05	8.57641e-05
RNASE3	0.974251	0.999046	1.23042	2.05712	0.775864	0.960199	2.38749	3.28975	2.08349	0.213981	1.40944e-05	8.59674e-05
TRPS1	0.298977	0.235855	1.39657	0.952441	0.178793	0.18041	0.790876	0.625844	1.80734	2.55008	1.42861e-05	8.70847e-05
SNX30	2.09071	1.33852	0.540441	0.40579	1.17611	1.11426	0.397681	0.345507	-1.76712	2.82634	1.44359e-05	8.79458e-05
SSH1	10.1133	7.55457	4.69963	3.87938	3.66225	4.39597	1.47906	1.14662	-1.67532	5.30191	1.45182e-05	8.83945e-05
STAM	3.32328	2.68728	1.14512	1.07447	2.20099	2.24459	0.693024	0.645381	-1.7698	2.77501	1.45843e-05	8.8744e-05
DIDO1	9.37805	8.1998	5.03277	5.31962	5.6973	5.8027	1.90318	1.80297	-1.65988	5.53225	1.47787e-05	8.98739e-05
NTNG2	6.90975	8.51944	18.7696	22.553	16.9429	16.3013	53.4275	52.906	1.64274	6.24555	1.47898e-05	8.98878e-05
C12orf10	4.95275	4.7167	1.70234	2.12002	3.73536	3.15165	0.554718	1.00086	-1.89973	1.75723	1.48475e-05	9.01854e-05
CAP1	342.973	328.339	210.497	196.041	370.78	372.764	130.482	119.232	-1.6368	9.48772	1.50618e-05	9.14325e-05
TMEM243	4.92905	5.38845	2.39289	2.15631	7.60435	6.50737	1.93412	2.21085	-1.78208	2.12542	1.51511e-05	9.19203e-05
KCNJ2	16.1131	11.0517	41.9218	26.3408	11.7263	12.6597	37.8062	36.525	1.63914	7.03045	1.52534e-05	9.24864e-05
DNTTIP2	15.6032	14.8543	30.265	31.2305	17.2752	19.8004	54.8716	53.8628	1.64058	6.33844	1.52645e-05	9.24986e-05
SCRN3	2.36213	1.71604	6.50344	5.23903	1.67983	1.60458	6.674	5.44476	1.69649	3.57743	1.52996e-05	9.26565e-05
MTM1	4.35973	3.20268	1.72159	1.02904	2.38344	3.00155	1.49932	0.699942	-1.7676	2.95101	1.54443e-05	9.34775e-05
LPIN1	0.552405	0.515081	0.939642	0.793673	0.55232	0.524417	1.92494	1.83178	1.72957	2.42701	1.56608e-05	9.47322e-05
NDUFV3	3.55601	3.32535	4.76168	4.62299	2.39044	2.6765	4.10037	7.72275	1.69178	3.1468	1.58849e-05	9.60016e-05
TIGD1	3.23007	2.52887	5.70891	4.73103	2.84315	3.4503	12.2478	9.08282	1.67561	3.84578	1.58894e-05	9.60016e-05
NAGK	40.45	45.4391	85.0613	107.137	71.0462	63.5902	192.248	220.357	1.63301	7.53778	1.59467e-05	9.62911e-05
UPK1B	1.4185	1.2555	2.83972	2.5418	2.29488	1.83631	5.46767	7.43928	1.69668	2.69509	1.59917e-05	9.64671e-05
TOMM40L	5.4108	5.72704	5.80912	6.90488	5.01134	5.20197	1.27942	1.53243	-1.70931	3.75073	1.59947e-05	9.64671e-05
CDADC1	0.83614	0.83563	1.73931	1.442	0.889861	0.718085	2.61738	2.9649	1.73623	2.36233	1.6027e-05	9.66048e-05
INPP4A	11.1543	8.9396	4.47756	3.54863	5.14823	5.22515	2.11417	1.62549	-1.66317	5.15758	1.61182e-05	9.70975e-05
C1orf204	0.327259	0.394146	0.266795	0.139764	1.4239	1.04331	0.280675	0.367378	-1.95414	0.451254	1.61888e-05	9.7466e-05
PBOV1	0.768403	0.693971	1.52015	1.37291	0.988896	0.789399	2.41791	3.33856	1.75521	1.90268	1.62332e-05	9.76758e-05
PRDM2	9.02256	6.89213	3.08322	2.47732	5.5296	6.17705	1.86083	1.756	-1.65486	5.19571	1.6291e-05	9.79656e-05
SHISA5	62.6485	74.4899	380.404	437.446	181.621	167.431	575.808	561.864	1.62929	9.5077	1.6349e-05	9.82568e-05
TMEM60	6.66795	8.043	8.68005	8.51876	12.9505	11.6796	42.4136	40.8316	1.65666	3.93284	1.64752e-05	9.89572e-05
MINOS1P1	1.51969	1.43042	2.73107	2.51937	2.42834	2.29619	7.70039	7.80475	1.68432	3.02117	1.65449e-05	9.93178e-05
SERPINB9	26.1127	21.5412	121.552	91.5617	27.7221	31.5309	140.946	85.7756	1.62953	8.14792	1.66388e-05	9.98229e-05
RAB8A	36.6017	36.3036	85.4561	85.3302	58.5553	56.9367	205.913	180.99	1.62804	7.66567	1.68787e-05	0.000101203
RFPL1S	0.742107	0.716637	1.36075	1.11852	0.959384	1.29098	2.93304	3.0997	1.69189	2.97005	1.70287e-05	0.000102043
RAB3GAP1	5.24651	4.52876	9.37816	8.65341	4.05956	4.2308	13.9478	12.6362	1.63815	5.27475	1.7168e-05	0.000102817
ZNF341	2.05298	2.20917	0.942843	0.959391	2.21608	2.12052	0.680934	0.651213	-1.76667	2.41681	1.72889e-05	0.000103481
ATP5SL	1.47687	1.81194	1.55587	1.2231	1.43735	1.4631	0.348765	0.336798	-2.09288	1.12587	1.76285e-05	0.000105452
RBM12B	1.98263	1.46326	0.852395	0.553014	1.07408	0.842419	0.329633	0.301521	-1.83256	2.2526	1.77934e-05	0.000106376
NOA1	1.78381	1.96507	0.816291	1.14272	1.3564	1.27351	0.469093	0.338994	-2.00001	1.40286	1.79244e-05	0.000107097
ACSL1	269.809	258.983	822.658	595.219	123.335	134.832	524.973	379.357	1.62097	10.6394	1.79533e-05	0.000107207
METTL4	3.91536	2.99799	7.58788	5.62334	2.61628	2.73375	10.3083	8.22363	1.65223	4.34369	1.80263e-05	0.00010758
KDM3A	29.9992	23.2739	12.5782	8.48356	16.17	17.1938	7.33735	5.2229	-1.63038	6.20076	1.84474e-05	0.000110029
SPINT2	6.04846	7.82587	23.2214	29.9807	15.811	13.6802	44.3556	48.8535	1.62752	5.41841	1.84958e-05	0.000110254
RPL32P3	4.27571	4.25247	2.62828	3.39048	7.2031	6.99438	2.1818	2.22909	-1.6921	3.11418	1.86718e-05	0.00011123
RGPD8	1.48705	1.08493	0.898282	0.529192	0.945159	0.856614	0.406739	0.2752	-1.77992	2.5752	1.86874e-05	0.00011123
RPS16P5	1.46042	1.18409	1.94834	2.06389	1.97432	1.57769	4.02398	6.27554	1.66834	3.02114	1.86921e-05	0.00011123
NATD1	14.1824	14.978	13.3704	13.7876	14.3822	16.2125	5.53909	4.64385	-1.63088	5.86091	1.87278e-05	0.000111378
SLX1A-SULT1A3	9.53758	10.8614	4.59175	4.83505	18.932	17.2031	5.18354	6.06484	-1.64226	4.4203	1.88359e-05	0.000111826
SLX1B-SULT1A4	9.53758	10.8614	4.59175	4.83505	18.932	17.2031	5.18354	6.06484	-1.64226	4.4203	1.88359e-05	0.000111826
NT5C2	80.3763	73.3124	236.774	195.762	68.3323	69.8446	262.085	209.52	1.61645	9.04537	1.90281e-05	0.000112901
XPC	15.675	15.0296	8.90583	8.95559	11.4262	12.1479	4.10816	3.66282	-1.6413	5.21741	1.92485e-05	0.000114143
RASAL2-AS1	1.02883	0.684517	2.56058	1.31138	0.844894	1.54491	2.76602	2.8509	1.75441	1.99834	1.93362e-05	0.000114597
PITPNM1	28.9977	34.2465	14.2343	17.2256	39.7114	39.6557	12.298	12.9247	-1.61942	6.71867	1.93918e-05	0.00011486
ZSCAN25	1.53311	1.42514	0.999786	0.958598	0.979964	1.08031	0.457415	0.268225	-1.86901	2.08134	1.94785e-05	0.000115307
FSCN1	2.81168	2.98611	0.748242	0.804376	2.48714	2.30195	0.351152	0.727272	-1.77376	2.22344	1.96782e-05	0.000116422
UBR3	2.17053	1.51816	4.00444	2.33218	1.16653	1.19802	5.03225	3.65051	1.64584	4.39036	1.97612e-05	0.000116846
ANKLE2	11.0475	10.4009	5.88169	5.4735	6.70244	7.10718	1.97361	2.13928	-1.64753	4.83121	2.02138e-05	0.000119453
ACSL3	5.251	4.73332	11.4249	8.72582	4.6305	4.55298	17.3206	14.2626	1.62298	5.27321	2.0362e-05	0.000120259
NCF1B	388.083	439.251	765.05	854.883	496.555	442.271	1418.03	1515.16	1.60944	10.2258	2.04165e-05	0.000120511
LOC100130357	2.42708	2.29959	1.36094	1.1618	3.00894	2.9808	1.25155	0.882192	-1.76993	2.16106	2.06441e-05	0.000121785
FAM13B	6.41981	5.20175	3.17726	2.0745	3.94795	3.99926	1.86981	1.24917	-1.6601	4.28117	2.06564e-05	0.000121787
ACO1	0.138421	0.119498	1.48976	1.17421	0.148364	0.125288	0.665491	0.616467	2.05425	1.0332	2.0677e-05	0.000121838
RBM47	50.6481	43.4163	127.684	88.3374	23.6049	26.4345	91.6267	72.0597	1.6101	8.39506	2.07093e-05	0.000121944
DSG3	1.14396	1.32471	2.20359	2.35526	2.07325	2.20714	4.46216	6.43494	1.63401	3.94766	2.07302e-05	0.000121944
LEMD1-AS1	0.930162	0.805332	1.88798	1.64597	1.46619	1.63533	3.58329	4.71253	1.68435	2.53984	2.07306e-05	0.000121944
PTAFR	215.306	231.167	148.159	152.996	299.402	315.843	96.6468	98.2134	-1.60809	9.71567	2.08188e-05	0.000122393
PDE4C	1.68539	1.75261	2.86556	3.06068	3.06334	2.80756	6.8633	9.45706	1.62627	4.39974	2.08658e-05	0.000122598
NUCKS1	0.671407	0.599408	1.28618	1.2453	0.653618	0.545862	1.66719	2.09644	1.68135	2.82902	2.09176e-05	0.000122833
C4orf29	2.49583	2.19883	5.7777	4.46515	1.83912	2.07185	7.93475	5.89054	1.67931	3.16254	2.17654e-05	0.000127719
DNAJC25	1.05636	0.825031	2.44577	2.66607	1.20767	1.16126	3.90951	3.94472	1.7076	2.43672	2.17747e-05	0.000127719
SHB	0.273996	0.386261	0.994291	1.24194	0.291328	0.266838	0.943925	0.991836	1.76728	2.02883	2.19024e-05	0.000128395
NCK2	8.52754	9.21201	27.1069	32.1917	12.3892	11.3743	37.8263	37.8395	1.6108	5.79551	2.21305e-05	0.000129658
PLIN3	25.0226	32.3038	81.9491	103.224	42.0258	39.68	108.965	127.756	1.60404	7.35837	2.23084e-05	0.000130551
LINC01191	0.623607	0.666435	1.53571	2.23218	1.32294	1.08153	4.4042	4.77063	1.85015	0.840574	2.23487e-05	0.000130712
UBE4A	13.2224	10.3755	5.84417	4.19995	6.43376	6.49353	2.82724	2.08204	-1.62764	5.30305	2.26051e-05	0.000132136
RPRD2	2.44356	1.91426	0.849533	0.688473	1.58607	1.82572	0.68792	0.494414	-1.68159	3.43654	2.30227e-05	0.000134463
CHMP5	18.9773	18.5829	112.921	109.919	32.3906	30.1383	108.996	98.3622	1.60253	7.10047	2.30295e-05	0.000134463
SCAP	14.7662	15.2806	7.21679	8.40558	14.3968	14.2495	4.95308	4.70418	-1.61372	5.48248	2.31166e-05	0.000134867
TUBB4B	27.2746	32.0896	10.8974	15.4194	40.7632	35.042	10.8016	13.3283	-1.61276	5.20788	2.31388e-05	0.000134871
CAMKK2	36.6586	34.2637	13.7622	13.2583	39.0614	40.0328	15.7688	12.865	-1.60229	7.17084	2.3153e-05	0.000134877
GCC1	16.4201	15.7653	11.1845	11.7748	13.0805	14.0589	5.85231	4.26274	-1.61755	5.57797	2.32205e-05	0.000135194
NUMB	189.967	157.76	151.203	107.65	154.277	165.932	71.0624	50.9404	-1.59864	8.90017	2.34072e-05	0.000136203
STIP1	11.9466	12.5039	9.15233	10.4956	13.7768	13.55	3.5143	4.46265	-1.62625	4.77181	2.34965e-05	0.000136645
MIR5047	283.103	219.45	202.112	124.817	177.412	165.634	78.1027	56.2507	-1.6571	4.03385	2.35738e-05	0.000137017
PPP2R2A	21.664	19.8426	35.9922	28.9911	21.1506	21.7862	73.5272	64.085	1.59929	7.14315	2.36674e-05	0.000137402
HIST2H2AA3	40.0812	49.9354	79.5174	107.444	85.9865	71.1064	183.796	261.015	1.60194	5.87496	2.36804e-05	0.000137402
HIST2H2AA4	40.0812	49.9354	79.5174	107.444	85.9865	71.1064	183.796	261.015	1.60194	5.87496	2.36804e-05	0.000137402
NCF1C	297.067	341.03	495.004	584.651	407.705	359.055	1070.71	1232.25	1.5957	9.75316	2.38598e-05	0.000138365
SDHAP2	3.30858	2.78198	1.58897	1.49982	3.00354	3.52036	1.25264	0.893714	-1.74863	2.3738	2.38805e-05	0.000138407
EPS15L1	33.3718	33.6154	16.459	16.3438	30.3001	33.1645	10.7594	9.97	-1.60365	6.35126	2.39903e-05	0.000138965
GPD2	2.24651	1.59281	2.19038	1.39952	1.68561	1.75774	8.05391	5.19345	1.6234	4.18562	2.4147e-05	0.000139794
PPFIA1	13.0702	10.9757	4.2959	3.10653	5.32948	6.16174	2.51839	1.7194	-1.63206	4.98077	2.41894e-05	0.00013996
TM9SF4	30.8815	27.3396	18.5363	17.858	18.2454	19.5309	8.89992	5.99066	-1.60674	6.19537	2.43112e-05	0.000140585
TMEM43	51.2345	48.006	31.891	24.6727	43.0925	46.0798	20.659	14.2163	-1.59989	6.86977	2.43963e-05	0.000140997
CCNG1	3.76101	3.28335	2.64701	1.88782	2.58607	2.61465	1.46372	0.763709	-1.7595	2.56243	2.47929e-05	0.000143209
LINC00656	1.2429	1.32635	0.436151	0.353921	0.445082	0.604617	0.0451536	0.0530672	-3.0643	0.175257	2.51601e-05	0.000145248
RASSF3	205.166	169.066	97.628	71.5451	97.6901	111.296	45.3367	32.4028	-1.59209	8.50144	2.55008e-05	0.00014705
PGRMC1	0.954191	0.853194	3.67652	3.01328	0.837192	0.758848	3.47205	2.8409	1.76252	1.98424	2.56272e-05	0.000147646
BSDC1	12.6128	13.496	7.92537	8.2382	11.8407	11.8587	4.23722	3.89407	-1.60439	5.58353	2.56331e-05	0.000147646
ZNF282	2.64068	2.9622	1.07889	1.20624	6.01416	6.06657	1.72729	1.93245	-1.63789	3.47268	2.57708e-05	0.000148356
DISC1	0.752211	0.678871	1.59984	1.38175	1.27069	1.31744	4.74799	3.90824	1.62088	3.80972	2.59828e-05	0.000149493
AGAP2	13.7239	14.4452	8.85577	11.0593	16.5038	17.3474	4.73175	5.45671	-1.59668	6.07192	2.62191e-05	0.000150767
CSF2RB	263.854	247.425	793.615	637.077	180.206	216.725	863.443	541.368	1.58696	11.1471	2.62704e-05	0.000150978
DEDD2	75.1518	88.6613	48.7503	62.2028	132.857	118.516	37.5638	44.1341	-1.5899	7.26587	2.63499e-05	0.000151349
TIA1	4.65513	3.74674	5.37973	3.4858	2.58037	2.5505	10.6943	7.88445	1.61141	4.57634	2.69279e-05	0.000154583
SACM1L	10.4176	8.21133	4.91406	3.10812	5.22856	5.62221	2.54476	1.67778	-1.63981	4.27657	2.69659e-05	0.000154714
RHOT1	6.21089	5.75062	34.8416	24.5162	8.26725	9.01356	29.4616	24.9529	1.59371	5.9239	2.70954e-05	0.00015537
CYB5D1	0.968934	0.958847	0.761344	0.649454	0.817751	0.643028	0.26957	0.212217	-1.9457	1.33151	2.7213e-05	0.000155957
HNRNPF	38.8083	38.1243	124.615	122.711	37.8303	36.7236	142.264	113.564	1.58589	7.81675	2.72919e-05	0.000156322
LRRC75B	1.73265	2.44062	0.863674	1.12194	1.78635	1.61912	0.362983	0.421369	-2.08321	0.724026	2.76568e-05	0.000158323
FAM53C	70.1448	68.6307	44.5715	39.6156	43.8356	46.4629	19.3478	14.6023	-1.5859	7.58373	2.79718e-05	0.000160037
MCM3	0.410607	0.456727	2.45835	2.01262	0.115687	0.250774	0.655	0.533493	2.2043	1.48031	2.79888e-05	0.000160046
SPAG9	42.3216	34.6886	15.2883	11.4112	28.9535	30.5164	10.5274	9.65309	-1.58467	7.56731	2.80656e-05	0.000160395
KLHDC8B	13.8662	17.0439	4.46349	5.79414	19.8434	17.1252	6.74023	6.51494	-1.60681	4.50603	2.83538e-05	0.000161952
SRP54	13.4583	13.1939	28.4331	22.5388	6.16909	6.12588	23.0175	18.7114	1.60076	5.23123	2.84608e-05	0.000162473
ACP2	0.69897	0.878328	1.36345	1.59199	0.190299	0.180362	0.431834	0.832908	2.12904	0.753532	2.86658e-05	0.000163552
RNFT1	5.57884	5.26952	4.10038	2.53396	4.56531	4.29508	2.02788	1.41411	-1.6907	2.91639	2.86871e-05	0.000163582
CLTC	32.2835	24.5244	16.3802	11.3055	12.906	14.1156	5.79485	4.29539	-1.58717	7.02874	2.87185e-05	0.00016367
GMFB	4.67575	3.75845	1.65855	1.17405	1.82887	1.97758	0.780765	0.553006	-1.72545	3.0891	2.88526e-05	0.000164343
ANKRD52	3.35441	3.05786	2.18405	2.43536	2.71635	2.78423	1.09305	0.881634	-1.62338	4.32686	2.89737e-05	0.000164941
ARL6IP1	14.5206	12.8694	8.00417	5.78378	9.04976	9.6928	4.3274	2.9222	-1.63078	4.25209	2.92793e-05	0.000166588
USP10	36.9621	38.7588	18.2777	17.0922	17.1174	16.3444	6.2312	5.6781	-1.59197	6.09764	2.94997e-05	0.000167749
ECEL1P2	1.1222	1.03649	0.661955	0.853482	1.06973	1.60197	0.0666321	0.212201	-2.33244	0.161746	2.96989e-05	0.000168788
AHCTF1	36.8276	28.5454	21.7637	15.2092	18.2518	21.3296	6.64077	6.09872	-1.58145	7.38295	2.97528e-05	0.000169
SOCS4	3.08903	2.32321	1.38886	0.833394	1.74646	1.62334	0.606976	0.5514	-1.66318	3.42059	2.99771e-05	0.00017018
IL18R1	2.69642	2.74394	10.5023	6.8237	1.67787	1.84022	7.05624	5.16974	1.62341	4.14131	3.00095e-05	0.00017027
ADAR	128.842	105.273	476.134	382.207	113.691	125.716	472.716	338.381	1.57353	10.8115	3.05272e-05	0.000173111
ZMYND15	6.98982	7.64882	13.7662	17.1466	4.36226	3.50982	11.2271	13.2459	1.60237	4.57675	3.08594e-05	0.000174898
RNF34	15.7397	14.9905	8.31727	7.70008	13.1223	13.3394	5.78606	4.29006	-1.61291	4.42286	3.09339e-05	0.000175224
BACH1-IT2	1.41629	1.24445	1.09848	1.19986	0.623691	0.6697	1.74764	2.62813	2.07445	0.130874	3.1066e-05	0.000175875
FAM89B	27.9278	38.5664	26.762	33.6783	51.2731	42.319	13.9367	17.1094	-1.5834	5.52015	3.13185e-05	0.000177206
TMEM55B	15.205	17.0103	9.42047	11.0756	24.8368	22.7535	7.90624	8.23104	-1.59331	4.7517	3.16506e-05	0.000178986
DGKD	12.8305	12.0217	3.72808	4.07295	12.5453	13.0079	4.84691	4.19163	-1.58156	5.7266	3.17262e-05	0.000179315
BTBD7	3.61825	2.9343	1.97246	1.46586	1.63578	1.78131	0.773898	0.521835	-1.64824	3.97004	3.18435e-05	0.000179879
ADPRM	1.53481	1.68593	5.02318	5.70642	1.9451	2.13726	7.32052	6.18582	1.66902	2.58631	3.18693e-05	0.000179925
LMTK2	11.5691	8.80932	21.2281	17.3925	3.36452	4.14216	13.6629	10.0439	1.57783	6.65674	3.2093e-05	0.000181089
FAM26F	28.5205	35.7729	51.1676	61.1314	138.315	117.735	365.42	410.694	1.57011	7.41832	3.22085e-05	0.00018164
TATDN2	10.1492	10.1689	4.20596	4.41255	9.55281	10.0982	3.85581	3.17052	-1.59119	5.09415	3.223e-05	0.000181662
VPS26B	6.27539	6.06303	2.88389	2.97316	5.15045	5.11574	1.57579	1.67363	-1.62167	3.89103	3.26675e-05	0.000184027
IRF9	50.5036	55.6342	333.891	382.858	149.693	141.88	445.9	443.289	1.56623	8.71522	3.3373e-05	0.000187794
ZNF219	1.19317	1.701	0.956813	0.862833	2.81458	2.42609	0.809427	0.87735	-1.68158	2.17767	3.34234e-05	0.000187974
TBL2	0.712178	0.805993	0.461954	0.424319	0.413503	0.391325	0.138945	0.0741475	-2.4778	0.42897	3.36007e-05	0.000188868
FBXO38	14.542	12.349	13.9186	10.5947	6.78089	7.54241	2.95305	2.23626	-1.60035	5.21978	3.37324e-05	0.000189505
AKR1A1	2.05809	1.7287	1.29405	1.57856	3.9228	3.05819	1.1882	1.17726	-1.73629	1.67898	3.38284e-05	0.000189939
PRRC2B	10.4605	9.45299	5.71637	5.8234	8.24206	10.5297	3.36079	2.76858	-1.57385	6.28444	3.39324e-05	0.000190419
PRELP	0.865304	0.991179	1.3308	1.40088	1.64186	1.46506	3.84305	4.96372	1.59605	3.58786	3.4028e-05	0.000190851
RCOR3	10.8762	7.99141	4.33364	2.71344	6.92359	7.23892	2.68517	2.28807	-1.59736	4.65707	3.4216e-05	0.000191801
RNASEH2C	1.17303	1.13081	3.5821	3.88774	1.04696	0.930919	2.4728	3.3094	1.66026	2.61561	3.43012e-05	0.000192173
CAST	16.2946	14.428	27.0373	24.5733	12.1367	13.6861	36.3742	35.9394	1.56619	6.69256	3.48483e-05	0.000195131
CCNY	31.1248	24.5346	15.163	12.7375	17.2955	17.4759	6.48484	5.81767	-1.57188	6.28394	3.50827e-05	0.00019623
N4BP2L1	2.17829	1.8687	5.73688	4.27739	3.01451	3.48346	12.0785	9.1055	1.59478	3.99254	3.51815e-05	0.000196675
CRHR1-IT1	1.26503	1.51821	3.6069	4.08918	2.50148	2.36213	5.21626	7.63402	1.60961	3.12139	3.52159e-05	0.00019676
TEC	0.280374	0.211185	0.840324	0.677702	0.372491	0.379191	1.74007	1.2665	1.76534	1.39376	3.54372e-05	0.000197888
DNPEP	0.54029	0.93376	1.26721	1.58432	0.779985	0.823506	2.07863	2.55108	1.70943	1.69695	3.56419e-05	0.000198923
ERBB2IP	33.9725	22.9378	17.5375	10.5755	23.382	25.4757	12.2477	7.90505	-1.56454	7.08785	3.57415e-05	0.00019937
PDP1	1.12713	0.897123	0.501623	0.309714	0.465753	0.498813	0.135327	0.108477	-2.10145	1.17181	3.58737e-05	0.000199999
PDF	1.72482	1.93405	0.904325	0.919179	1.81731	1.30083	0.461188	0.429817	-2.07932	0.505434	3.61142e-05	0.00020123
NIN	24.0327	18.8712	9.75704	7.02867	15.2313	16.814	5.91923	5.15247	-1.56369	7.04789	3.61963e-05	0.000201578
AP3D1	19.6429	20.6206	42.5961	49.5955	13.9213	13.8958	42.8864	41.0744	1.56094	7.27035	3.65044e-05	0.000203184
TNIP1	241.63	259.903	172.501	201.585	346.374	353.722	105.191	117.689	-1.55735	9.36807	3.67332e-05	0.000204346
RANBP6	1.49487	1.14681	1.04863	0.879883	0.523131	0.579006	0.230588	0.129123	-2.01786	1.8198	3.68219e-05	0.000204728
ZNF763	2.08673	2.27856	1.48565	1.14554	1.02023	1.0139	0.171597	0.265301	-1.94271	1.65636	3.69946e-05	0.000205577
TSC22D3	249.617	268.904	142.149	148.484	512.162	482.106	188.039	174.198	-1.55587	9.26211	3.72905e-05	0.000207109
PREB	6.63603	7.2893	3.63339	4.38047	5.74426	5.41454	1.56588	1.84393	-1.63926	3.3106	3.79461e-05	0.000210636
NGRN	8.34823	9.23492	7.44931	8.33362	9.6716	9.04071	3.83342	3.15384	-1.61659	3.70448	3.82871e-05	0.000212414
GNA15	5.17948	6.31355	7.22662	9.58115	11.8975	10.9356	3.95362	3.95295	-1.58962	4.08482	3.84299e-05	0.00021309
WHAMMP3	0.704104	0.535121	1.11256	1.11068	0.555686	0.741208	1.389	1.79556	1.69194	1.84336	3.90984e-05	0.00021668
TP53INP2	15.9315	15.8257	8.13127	7.20661	9.0549	10.9335	3.85501	3.03372	-1.57759	5.25475	3.92287e-05	0.000217285
LOC103021295	27.1707	25.2	19.7602	15.1914	27.4259	26.4408	10.5599	8.86662	-1.62901	3.22633	3.96494e-05	0.000219496
MIR6084	21.1804	29.6358	7.36125	7.63399	32.3742	33.1403	9.94331	9.02839	-1.84198	1.07919	3.98013e-05	0.000220218
NRBP1	42.7374	44.5996	25.8541	31.0048	48.0495	44.6486	18.0726	16.3227	-1.55763	6.22138	3.99012e-05	0.000220652
GPN3	2.26145	2.29918	4.12947	4.06091	2.11539	2.21924	7.02832	6.57586	1.63616	2.62766	4.0164e-05	0.000221985
RPS8	29.116	34.3186	49.8219	63.7106	23.4124	20.8156	51.9252	69.2884	1.56532	4.91658	4.0867e-05	0.000225749
SERPINB9P1	3.90101	3.94892	14.1705	15.1245	13.8168	15.6455	44.707	40.8561	1.56411	4.5748	4.08956e-05	0.000225785
GPX8	1.27738	1.35387	2.52705	2.75588	2.22037	2.37851	4.38165	6.65733	1.58411	3.4822	4.11273e-05	0.000226942
MOB3A	317.788	333.092	227.242	239.007	399.1	422.644	158.848	136.625	-1.54653	9.86166	4.12765e-05	0.000227565
PATL1	33.1285	28.101	93.0157	66.7825	23.5381	26.5761	103.073	68.8602	1.54867	7.83664	4.12847e-05	0.000227565
PPP1R14B	19.3424	24.0898	35.3465	42.8381	30.4173	27.2453	70.689	89.3191	1.55407	5.38827	4.17051e-05	0.000229759
ARMC7	8.58254	9.75116	7.28678	8.9894	11.9556	10.9436	4.06745	3.98992	-1.58323	4.15001	4.17335e-05	0.000229792
SULT1A1	27.064	34.3752	11.1976	13.8697	81.436	70.9545	22.3723	27.784	-1.55141	5.84981	4.19532e-05	0.000230878
NAT9	2.50351	3.14349	1.31543	1.38061	2.3709	2.25071	0.578654	0.698179	-1.76356	1.94215	4.20377e-05	0.000231219
STAU1	26.8886	23.8789	51.7172	41.1325	16.0877	18.7217	66.9104	47.0592	1.54851	7.07331	4.21837e-05	0.000231897
CCNL1	75.023	67.3179	157.063	127.459	66.929	64.6238	213.881	195.05	1.54314	8.46987	4.31776e-05	0.000237234
CRISPLD2	30.3136	28.4891	14.9402	13.7267	24.0977	28.7148	11.2764	8.23191	-1.54959	6.51893	4.33678e-05	0.000238151
GALK1	9.15213	10.741	34.5669	48.2193	9.33664	6.87785	23.1961	27.6652	1.56707	4.85322	4.34248e-05	0.000238337
PAXIP1-AS2	0.620055	0.626789	1.2651	1.10023	0.173898	0.294548	0.655994	0.812538	2.22301	0.282278	4.43634e-05	0.000243358
TLE3	115.103	118.565	182.33	202.265	86.0505	97.7701	34.6363	29.5784	-1.54064	9.28087	4.45856e-05	0.000244446
ACSL6	0.945832	1.13413	1.63847	1.90911	2.08178	1.8356	4.08388	6.14544	1.56167	4.01634	4.46159e-05	0.000244481
HIPK2	3.3078	2.58791	2.80302	2.38671	2.26013	2.50386	7.35816	6.60217	1.54652	5.82671	4.47177e-05	0.000244907
MSRB3	1.98334	1.68839	2.36434	2.30557	2.23048	1.98867	4.37457	6.61335	1.568	3.75585	4.50969e-05	0.000246852
PTPN2	3.79901	4.21218	12.0271	11.8264	4.94235	4.94372	13.9525	14.5234	1.55509	4.90817	4.53946e-05	0.00024835
SMPD2	5.00331	5.32828	2.48919	2.78545	7.72843	7.44197	2.1003	2.5226	-1.6152	2.90269	4.56523e-05	0.000249626
C2orf91	1.29632	1.00493	3.1214	2.88784	1.86391	2.25068	5.04718	5.57898	1.58163	3.42534	4.63017e-05	0.000253042
TAF13	5.5309	6.39546	4.81933	3.54383	4.35028	3.42164	2.13811	1.12018	-1.95686	1.20307	4.68145e-05	0.000255708
SORD	1.61231	1.59149	4.13895	3.73615	3.18223	3.25891	9.95697	9.41981	1.56563	3.74252	4.70667e-05	0.000256948
PSMB10	49.4449	65.2301	99.004	134.691	123.507	99.5236	284.502	358.154	1.53599	7.25444	4.7103e-05	0.00025701
C7orf60	5.05767	3.72711	3.54279	2.21817	3.18611	3.38782	1.49854	1.04366	-1.61007	3.5488	4.75621e-05	0.000259376
SERINC5	2.68408	1.86078	3.19498	2.02328	1.84374	1.67873	0.971776	0.600306	-1.61879	3.59427	4.76015e-05	0.000259454
PRKY	1.05789	0.95418	2.18847	1.98137	0.39635	0.375446	1.01241	1.23246	1.63659	3.05793	4.7761e-05	0.000260185
ICAM2	8.79828	11.3001	6.74346	7.5902	12.0461	10.667	30.5656	35.2917	1.55074	4.36101	4.79419e-05	0.000261031
B4GALT3	4.61957	4.85193	2.7936	3.67992	5.2465	4.96251	1.76237	1.71382	-1.61406	3.16808	4.85458e-05	0.000264038
OBFC1	0.753598	0.802685	4.40097	4.63615	2.27365	2.34682	7.22449	6.66194	1.55091	4.56029	4.86048e-05	0.000264219
BAMBI	0.0539528	0.0370049	0.139098	0.131672	0.536142	0.592652	1.33245	1.86914	1.80134	0.0402366	4.8917e-05	0.000265776
RNF44	84.3398	85.5768	61.9674	65.9464	80.7118	87.1956	39.3877	27.9195	-1.53151	8.11249	4.97141e-05	0.000269963
TECPR2	29.3073	27.8905	43.9214	44.0662	26.1693	31.0106	12.4207	9.05153	-1.53164	7.92523	5.03355e-05	0.000273193
ZNF316	19.559	23.5484	9.86464	11.5768	42.9036	38.4282	12.986	14.854	-1.53025	7.29681	5.05132e-05	0.000274012
ARL3	2.32579	2.40586	1.31853	1.79316	2.5947	2.71826	0.665202	0.838196	-1.63012	2.83672	5.08902e-05	0.000275765
DTWD2	0.655829	0.407071	1.37215	0.907147	0.563005	0.719388	2.08228	1.72842	1.61815	2.62589	5.08902e-05	0.000275765
RWDD1	1.99568	2.08898	2.98032	3.89292	1.47436	1.83074	4.12468	4.61823	1.64713	2.28887	5.12401e-05	0.000277514
CEP295	1.95809	1.64005	0.679287	0.56651	2.27429	2.4559	0.810907	0.760873	-1.57964	3.49213	5.12948e-05	0.000277664
LINC00665	2.2308	2.60188	3.49077	4.14697	3.68081	3.62263	6.94569	10.9346	1.57076	3.04545	5.16988e-05	0.000279698
MARS	43.8539	43.5929	33.5809	34.4808	59.8423	56.0974	20.0946	20.7173	-1.53032	6.83064	5.17252e-05	0.000279698
PPM1A	22.1293	18.9265	11.8999	8.76114	15.2774	15.8155	7.45374	5.28394	-1.53171	6.75867	5.20817e-05	0.000281478
WASF2	67.9472	66.4314	37.5998	40.5806	58.2266	63.7358	21.4207	20.2033	-1.52708	8.06509	5.21714e-05	0.000281718
CPT1A	2.12667	2.17211	4.79238	4.50295	2.66475	2.77137	7.81591	7.7855	1.54677	4.50856	5.21811e-05	0.000281718
PSPC1	6.27235	5.69566	11.198	10.8373	6.24391	6.19704	18.0494	18.205	1.54379	4.64732	5.31624e-05	0.000286864
SERINC3	88.0244	71.4008	46.1485	30.094	36.8515	42.5017	18.5499	12.7489	-1.53134	6.81063	5.35636e-05	0.000288877
C10orf128	11.5023	10.8248	5.13285	5.97906	30.7007	26.715	10.9086	10.5857	-1.53614	4.84949	5.35972e-05	0.000288906
LINC01502	2.10351	2.65703	3.61067	3.94953	4.4465	3.81449	7.49054	13.0055	1.54835	3.76218	5.37379e-05	0.000289512
CHST2	1.01618	1.44468	1.89483	2.084	0.918752	0.929652	3.18672	2.78469	1.59969	2.88725	5.42316e-05	0.000292019
ENG	1.87519	1.89016	0.586804	0.543087	0.415489	0.407943	0.131869	0.0858481	-2.27366	1.28044	5.42919e-05	0.00029219
TPM4	164.052	158.627	354.539	364.855	119.736	127.356	353.612	343.575	1.52077	9.35923	5.47644e-05	0.000294578
ZNF613	0.705314	0.873426	2.01123	2.05306	0.466124	0.543995	1.55641	1.57889	1.75984	1.53009	5.50399e-05	0.000295904
TMEM39A	1.28956	1.19104	0.875959	0.578442	0.581064	0.71648	0.234699	0.158423	-1.87451	1.83804	5.56823e-05	0.000299201
SESN1	1.99224	1.56282	0.840615	0.60164	1.06266	1.14621	0.438687	0.303084	-1.80956	1.6877	5.70045e-05	0.000306145
COPS3	12.6325	12.7362	5.55883	4.87991	8.57272	8.00266	3.47126	2.87311	-1.57708	3.77856	5.71216e-05	0.000306613
CHSY1	14.1941	12.7661	68.716	52.0315	4.93663	5.73751	20.0885	14.2254	1.52686	6.77639	5.79453e-05	0.000310872
GLT8D1	2.2817	2.11438	0.889379	0.687809	1.61318	1.77117	0.295068	0.469513	-1.78039	1.61311	5.8184e-05	0.00031195
IL12RB1	3.26045	3.77441	2.08363	2.76131	7.29181	6.7527	2.21392	2.46713	-1.5634	3.41749	5.82071e-05	0.00031195
RNF144A	0.824696	0.709403	5.45411	3.82979	2.49692	2.7376	9.3045	7.23409	1.53464	4.54821	5.84012e-05	0.000312826
KANSL2	3.25683	2.87068	1.66308	1.67877	2.79087	2.90062	1.0214	0.883387	-1.65945	2.3603	5.87832e-05	0.000314619
PRKRIR	7.7588	6.41512	4.01067	2.57094	3.61088	4.14798	1.40118	1.19676	-1.59314	3.73731	5.88201e-05	0.000314619
UBASH3B	3.04147	2.60742	2.54947	1.87326	2.09726	2.29777	0.697642	0.700049	-1.58291	3.77955	5.8828e-05	0.000314619
SRPR	56.1542	55.2947	39.3618	38.5709	40.5296	42.0713	14.6632	14.132	-1.52	6.86165	5.90707e-05	0.000315588
TMEM189	0.945974	1.20515	0.406823	0.554368	1.02326	0.871724	0.397598	0.269423	-1.92471	0.805004	5.93951e-05	0.000317155
INTS3	6.89983	6.06466	17.1354	17.6407	7.74743	7.21158	28.8663	22.2226	1.52023	5.99482	5.94355e-05	0.000317206
ACTG1P17	1.68478	1.5715	3.63824	3.53738	2.88119	2.63155	5.67642	8.59286	1.57641	2.64653	5.98018e-05	0.000318995
TNFAIP1	2.80592	2.54696	1.553	1.51811	2.02901	2.16797	0.713289	0.650908	-1.64013	2.74509	6.01233e-05	0.000320543
CYB561D2	5.1719	6.45746	2.56522	3.51753	8.71711	6.99833	2.83903	2.89241	-1.5915	2.75582	6.01932e-05	0.000320749
ZCCHC11	3.22208	2.72584	1.62008	1.27824	3.21865	3.39983	1.1246	1.08857	-1.56397	3.69728	6.05438e-05	0.000322449
LOC100506422	0.645945	0.811697	1.84346	1.81457	1.32833	1.3408	3.71631	4.03677	1.60349	2.17839	6.07144e-05	0.00032319
SRCAP	18.4819	16.7729	10.8127	11.6458	10.2094	13.385	5.5257	3.5641	-1.51828	6.8875	6.09603e-05	0.00032433
STK4	127.455	99.3801	53.0883	37.6358	69.5754	73.0398	30.7048	24.4062	-1.51133	8.6716	6.13986e-05	0.000326493
LASP1	237.818	243.392	147.795	158.127	256.288	277.331	108.064	90.003	-1.50972	9.66609	6.16628e-05	0.000327727
CDC7	0.133	0.167676	1.15473	0.96244	0.0340989	0.0864556	0.482192	0.24743	2.85581	0.460867	6.22357e-05	0.000330601
MARCKS	172.2	175.362	158.071	139.19	214.926	232.163	80.4456	75.5414	-1.5085	9.39105	6.25815e-05	0.000332266
DSE	27.7322	22.3493	19.1147	11.8538	26.2469	29.5922	13.3247	9.18115	-1.51539	6.33122	6.29201e-05	0.000333891
RPS19BP1	22.4799	30.1548	13.2522	19.0425	57.5489	48.3309	13.6376	20.0517	-1.52105	4.83845	6.3661e-05	0.000337647
OGFOD3	0.633465	0.695104	1.44755	1.52568	1.06284	0.970693	2.30731	3.14545	1.56527	2.73823	6.38364e-05	0.000338402
PPP1R35	17.1802	23.9008	12.5655	16.8034	20.1076	15.3663	5.96069	6.82085	-1.55967	3.7912	6.39553e-05	0.000338848
SMARCD2	24.0028	27.5377	12.5517	14.7478	30.283	29.267	9.27543	10.5884	-1.51602	5.77716	6.39865e-05	0.000338848
KIAA0040	25.7492	24.9663	80.7188	66.3273	28.7007	33.4447	92.8486	81.5975	1.50744	8.00194	6.40356e-05	0.000338932
LINC01126	3.22629	2.43009	2.15238	2.08733	2.79257	2.66306	1.49851	0.844644	-1.72495	1.87969	6.41791e-05	0.000339516
TMEM140	106.011	117.659	332.346	395.363	244.686	234.905	688.783	694.603	1.50526	9.49777	6.45167e-05	0.000341126
ZNF142	1.67591	1.54659	0.754737	0.819585	0.728134	0.997754	0.301196	0.218943	-1.73342	2.46875	6.47956e-05	0.000342424
NPHP4	1.95462	1.86881	1.07381	1.26569	1.73712	1.49913	0.902525	0.571378	-1.60408	2.92419	6.51485e-05	0.000343993
LTN1	3.77484	2.58852	2.04863	1.13529	1.43866	1.37281	0.786895	0.476151	-1.59515	3.72819	6.51596e-05	0.000343993
PITHD1	8.00556	8.35329	4.54005	4.97536	9.64184	8.82081	3.24512	3.25419	-1.56695	3.3717	6.52328e-05	0.000344202
LIG3	1.23912	1.15989	1.21287	0.867655	0.788345	0.930039	2.75255	2.38976	1.59986	2.40644	6.5296e-05	0.000344358
MESDC2	1.22991	1.20505	1.68723	1.48954	1.27999	1.2306	2.53275	3.77466	1.56016	2.94865	6.63793e-05	0.000349892
C6orf120	3.56574	2.9863	2.62387	1.58684	1.61947	1.65317	0.89831	0.514359	-1.65453	3.00909	6.68121e-05	0.000351992
THEMIS2	238.453	260.592	539.474	588.947	250.925	250.158	758.648	710.313	1.5012	10.2585	6.72845e-05	0.000354298
INSIG2	3.19567	2.87542	1.49947	0.949779	2.9992	3.0223	0.910998	0.969446	-1.62923	2.41908	6.75829e-05	0.000355687
ASAP1-IT1	4.10409	5.01712	3.58722	4.80062	8.72909	6.83398	3.04026	2.88023	-1.59956	2.53279	6.77264e-05	0.000356259
GSTTP2	2.03819	1.87771	3.40833	3.29668	2.32611	2.49574	5.2467	6.85768	1.55974	2.83836	6.81112e-05	0.0003581
DESI2	3.14065	2.42852	1.37461	0.768485	1.59422	1.48567	0.683807	0.508543	-1.64826	2.6284	6.83608e-05	0.000359227
HDAC6	1.96583	2.24981	4.29349	5.24249	2.52875	2.52829	7.58579	7.29433	1.52832	4.11134	6.84924e-05	0.000359734
SLC35B3	2.94625	2.92765	2.52325	2.06005	2.90557	2.98685	1.37387	0.926293	-1.64913	2.38461	6.89027e-05	0.000361704
LINC00324	5.34938	6.04186	4.00434	4.66345	5.90987	5.20449	2.08599	1.97654	-1.58007	3.212	6.97537e-05	0.000365983
SMC3	13.8021	12.2575	6.01822	5.05704	8.35486	8.92527	2.92025	2.898	-1.52753	4.95455	6.98358e-05	0.000366227
CEPT1	3.36486	2.88993	7.55456	5.56312	1.63119	1.7531	5.75726	4.87576	1.57962	3.23588	7.00734e-05	0.000367285
DR1	22.0918	17.9303	12.5924	8.57675	17.8712	17.6447	7.95668	6.27038	-1.511	5.47666	7.10522e-05	0.000372225
C18orf8	13.8519	12.9013	7.5434	6.5615	11.1261	11.4423	4.95444	3.84003	-1.53472	4.33201	7.15511e-05	0.000374647
PTTG1IP	75.2753	77.5423	60.5621	56.1214	61.3615	61.3176	24.035	21.6941	-1.50003	7.27366	7.16138e-05	0.000374784
SF3B5	14.6042	19.2013	25.0714	35.1434	30.202	22.2473	59.4295	85.8403	1.507	4.74947	7.17957e-05	0.000375544
FBXW5	15.5656	18.9516	6.42669	9.09763	18.58	15.5609	5.31586	6.49524	-1.51628	4.83816	7.18688e-05	0.000375734
PTMS	5.44297	6.5012	7.25009	10.7294	23.1076	21.5671	44.4623	65.545	1.50411	4.73098	7.25003e-05	0.000378843
AKIRIN1	55.9483	52.0312	39.8641	30.3755	55.3803	60.3608	23.4897	19.5913	-1.49915	6.84411	7.28625e-05	0.000380541
GRIPAP1	29.6904	27.1868	50.4059	56.9338	44.4865	46.1817	128.162	125.417	1.49529	7.59185	7.2948e-05	0.000380638
TAF1C	2.19143	2.2872	3.56929	4.02753	2.54736	2.61361	6.55369	7.31979	1.52277	3.94192	7.29553e-05	0.000380638
LOC400958	1.93676	2.05025	3.02699	3.37227	3.06287	2.91383	6.31112	8.81616	1.52524	3.57848	7.35187e-05	0.000383382
GATAD2A	47.015	47.7695	24.6184	27.6953	52.2891	57.3592	21.2855	18.5472	-1.49531	7.71643	7.36432e-05	0.000383836
POLE4	0.915386	1.381	2.08464	2.23362	1.24855	1.15587	3.94383	4.34518	1.79879	0.612307	7.37491e-05	0.000384193
CAPN7	3.52292	3.3017	1.97947	1.37994	1.59626	1.7834	0.583564	0.516571	-1.62753	3.00978	7.37881e-05	0.000384201
RNF103	20.4403	18.4347	11.5519	7.62412	14.8619	15.3892	6.74308	5.21796	-1.51005	5.45607	7.4248e-05	0.000386203
PANK1	0.912444	0.870842	1.41305	1.49938	1.60216	1.30831	3.48648	4.5914	1.51889	3.77588	7.46339e-05	0.000388013
ZNF324	2.09166	2.6031	1.25019	1.7328	2.20936	2.41098	0.607029	0.713686	-1.63013	2.47145	7.53175e-05	0.000391368
ARAP1	367.493	380.76	224.408	262.76	508.97	517.132	177.463	181.273	-1.48942	10.7165	7.62625e-05	0.000396078
GADD45G	6.23217	7.56257	2.76712	5.08436	25.125	20.6679	7.41241	8.72394	-1.52604	3.48104	7.66543e-05	0.000397911
LYSMD2	49.6569	49.318	164.211	159.475	148.716	134.898	457.345	417.53	1.48931	8.38556	7.69699e-05	0.000399347
FBXO46	7.23414	8.59754	3.99571	4.63217	5.47714	5.65138	1.70424	1.87301	-1.54801	3.87629	7.71792e-05	0.00040023
ZNF234	1.24575	0.917125	1.93126	1.72771	1.26722	1.45731	3.33442	3.68366	1.53942	3.16557	7.75617e-05	0.000401875
SAMSN1	15.3292	15.2026	27.1935	20.0237	18.3731	21.0491	65.373	51.7625	1.49431	6.00035	7.75747e-05	0.000401875
B4GALT1	52.8068	47.9599	23.0295	19.6469	25.4137	28.8904	12.1971	9.01418	-1.49533	6.84516	7.78316e-05	0.000403002
ASF1B	3.96532	4.48955	1.05769	0.815498	2.23838	2.56937	0.648035	0.673894	-1.73159	1.85316	7.80687e-05	0.000404025
VSIG10	0.514025	0.612282	1.93233	1.90698	0.184751	0.304433	0.817151	0.62429	1.75629	2.11779	7.8992e-05	0.000408597
FUT4	1.26236	1.12032	1.12335	0.949344	1.06749	1.10012	3.73918	3.08432	1.53069	3.34884	7.94091e-05	0.000410373
ANKRD13D	120.972	125.567	65.9334	78.5019	193.96	182.504	54.713	69.1848	-1.48723	7.95259	7.94719e-05	0.000410373
TROVE2	6.03318	6.00895	12.6093	10.04	6.3725	6.48561	18.1348	18.004	1.49837	5.08704	7.94804e-05	0.000410373
PWWP2A	2.68412	2.35492	0.918491	0.744219	1.27893	1.3175	0.377443	0.402087	-1.66917	2.35093	7.94955e-05	0.000410373
LOC100190986	12.256	10.7066	15.9952	15.7981	14.9224	14.1562	33.7975	41.9731	1.49197	5.6012	8.01345e-05	0.000413463
POLR3GL	2.94691	3.10423	3.75263	5.94529	7.01377	6.67225	15.424	20.1155	1.52001	3.2453	8.05863e-05	0.000415585
PRR7	8.18137	12.5021	4.59056	6.63956	18.7401	15.0306	4.4263	6.54548	-1.51753	3.83038	8.08102e-05	0.00041653
ZFP30	0.8265	0.82696	0.984178	1.14332	1.11624	1.02255	2.38573	3.2505	1.54196	2.74077	8.1332e-05	0.000418798
ZNF362	2.0396	2.0113	0.841766	0.816155	2.20922	2.14752	0.631459	0.718484	-1.62037	2.16285	8.14757e-05	0.000419328
RCN2	1.23439	0.922856	0.535262	0.280324	0.570401	0.583387	0.13682	0.121217	-2.2331	0.368312	8.15213e-05	0.000419352
ZNF586	8.69641	8.06989	5.02246	4.46384	8.01857	8.54081	2.93518	2.77262	-1.53205	3.78786	8.25451e-05	0.000424405
TNFRSF1A	165.818	187.762	484.792	547.556	227.289	226.664	667.691	634.868	1.48193	9.77216	8.27818e-05	0.000425409
NEDD8-MDP1	7.20749	8.04432	11.7536	23.3643	11.3247	8.22887	18.8171	32.377	1.51546	3.54999	8.32834e-05	0.000427772
HMOX2	11.97	13.1312	3.41427	4.10711	11.6503	9.54602	3.49763	4.06152	-1.52024	4.03405	8.37361e-05	0.000429882
FBXO30	5.35052	4.11767	2.63013	1.41407	3.02985	3.45886	1.88019	1.03471	-1.54996	3.66322	8.38204e-05	0.000430099
TOP1MT	0.548848	0.561002	1.0943	1.18141	0.470709	0.598565	1.12494	1.57806	1.74492	0.890219	8.41666e-05	0.000431659
LOC101927851	12.2059	12.2401	10.5658	10.5829	16.5733	16.3189	6.65232	5.69298	-1.54155	3.33965	8.42225e-05	0.00043173
NFRKB	7.4122	6.7833	2.71792	2.51562	5.83058	5.84005	2.13358	2.0454	-1.51123	4.48033	8.43593e-05	0.000432215
TRAPPC8	15.2567	11.2534	8.60085	4.5203	6.76704	7.26054	3.95162	2.38863	-1.50232	5.55305	8.46476e-05	0.000433475
C11orf71	1.74707	1.89658	3.43902	3.22129	1.89356	1.49251	5.3152	5.5765	1.55818	2.63709	8.49119e-05	0.000434611
KLHL9	2.83007	2.25737	1.45378	0.963427	1.61796	1.56486	0.666546	0.528262	-1.61472	2.7223	8.51918e-05	0.000435826
FGD5-AS1	27.1577	22.7706	13.4688	9.29768	13.2112	14.2482	6.18609	4.68115	-1.49681	5.72388	8.55467e-05	0.000437424
DCP1A	7.24959	7.41013	13.8487	12.6685	7.08807	7.36037	21.3527	19.8342	1.48452	6.19856	8.56657e-05	0.000437814
FRS2	1.85629	1.02606	0.856823	0.506051	0.628445	0.6222	0.280709	0.19177	-1.71217	2.39489	8.62818e-05	0.000440742
HS1BP3	11.819	12.7184	5.09036	6.06119	15.3788	14.3827	4.4614	5.4229	-1.50378	4.50296	8.67749e-05	0.000443041
ICA1L	1.2064	1.09635	1.68165	2.02484	1.7462	1.75706	3.10007	4.93164	1.49783	4.19368	8.68354e-05	0.000443129
PLEKHF2	20.6452	16.4603	15.1381	8.98346	14.5223	15.4666	7.73099	5.13853	-1.49882	5.27126	8.7259e-05	0.000445069
EZR	14.1738	13.1836	20.1583	22.6306	17.2516	19.6947	44.1429	48.1559	1.48098	6.29478	8.77013e-05	0.000447102
LY6G5B	17.3818	18.204	13.38	12.9069	19.3717	19.3918	6.80051	6.65949	-1.54041	3.47014	8.78068e-05	0.000447417
VRK2	1.46453	1.08805	2.3481	1.71728	1.59475	1.43869	5.68985	4.67934	1.5529	2.64933	8.80389e-05	0.000448377
FYB	152.058	128.778	323.152	286.387	257.377	260.539	699.781	715.685	1.47544	10.7396	8.83755e-05	0.000449867
HTR3B	0.345457	0.457008	0.894271	0.617867	0.411437	0.319886	1.02401	1.41815	1.78486	0.399682	8.87708e-05	0.000451655
RASA2	10.9137	7.75171	11.7668	6.51212	5.95107	6.57673	3.25027	2.10073	-1.50223	5.27623	8.92123e-05	0.000453677
TIRAP	8.002	8.14212	4.06674	4.0198	4.19465	4.1931	1.37166	1.4146	-1.56807	3.38397	8.93353e-05	0.000454077
JAK3	31.8188	35.1981	123.535	135.489	58.0948	58.955	170.982	161.46	1.47469	9.04111	8.96912e-05	0.00045566
HLA-F	166.8	229.848	295.574	374.586	386.529	345.613	852.135	1073.87	1.47417	9.51748	8.97935e-05	0.000455953
MADCAM1	1.60434	2.017	0.449578	0.479907	0.397422	0.436429	0.128972	0.0337488	-3.54989	0.16354	9.05785e-05	0.000459712
DBN1	16.4242	16.8883	9.46703	11.8561	42.2163	42.0745	13.0875	15.1396	-1.47946	5.99855	9.06536e-05	0.000459865
UBXN2B	47.5246	34.8948	29.0285	19.9334	38.4986	39.7809	16.213	13.832	-1.47679	7.24695	9.10605e-05	0.000461701
EHD1	78.2094	91.2055	109.648	123.916	66.3134	68.9434	22.2941	23.8427	-1.47575	8.06202	9.1234e-05	0.000462352
SPRED2	2.64083	2.13143	0.978854	0.667243	0.86397	1.14798	0.372236	0.262609	-1.7178	2.34588	9.12997e-05	0.000462456
KRT23	24.4155	26.0552	13.4112	14.2982	19.9842	18.9281	5.91472	7.09574	-1.49381	5.16942	9.21434e-05	0.000466499
ZFP36L1	237.244	221.132	178.163	143.089	188.574	209.324	73.9512	67.9623	-1.47232	9.31851	9.22676e-05	0.000466897
HAL	27.4587	24.3884	15.2758	13.7492	17.7003	17.6943	7.61738	6.33072	-1.48332	5.99405	9.24581e-05	0.000467579
RPS6KB2	11.8788	13.0164	4.49584	6.63642	14.8675	13.9087	4.64974	5.23515	-1.50583	4.05052	9.24938e-05	0.000467579
TGIF2	8.72974	8.56182	16.4151	15.0126	10.2015	11.3387	32.4488	28.4259	1.47842	5.82164	9.27388e-05	0.000468587
PELI2	10.6883	7.77839	4.724	3.24912	9.15219	10.0402	3.89655	3.26188	-1.4884	5.23386	9.29113e-05	0.000469227
LEMD3	6.71945	5.44746	8.74112	5.46633	4.02044	4.40649	16.9037	11.2496	1.48443	5.23957	9.30425e-05	0.000469658
FNIP1	21.8117	15.0346	11.838	7.03809	11.4003	11.9768	5.5602	4.08246	-1.48155	6.19796	9.31977e-05	0.00047021
SNAI3-AS1	1.96637	1.97388	0.900031	0.791046	1.89044	1.69274	0.357975	0.592172	-1.67442	1.64828	9.35157e-05	0.00047135
ATP2A3	96.1096	109.385	48.1803	55.0151	93.3457	94.7136	37.1177	33.659	-1.47159	8.43709	9.36746e-05	0.000471919
CEP295NL	4.93902	4.56196	2.43388	3.13969	6.50214	6.90314	2.46772	2.24144	-1.53643	3.17523	9.40203e-05	0.000473428
KIAA0754	0.585046	0.442446	1.20147	0.840261	0.470636	0.579812	1.2354	1.38807	1.5603	2.56247	9.42792e-05	0.000474498
MAPK13	51.5461	49.2782	25.098	26.0427	43.9206	45.6068	14.2179	15.8346	-1.47182	7.75166	9.46347e-05	0.000476054
C9orf139	5.48355	5.93275	2.55273	2.91305	6.46291	5.86605	1.48241	2.27307	-1.50751	3.97883	9.5103e-05	0.000478175
41698	6.03171	5.5583	3.3572	3.0151	5.98587	5.74537	2.84575	2.05506	-1.54231	3.28431	9.51732e-05	0.000478293
MRGPRX3	3.6715	4.57655	6.24611	7.90208	5.68292	5.39518	14.1222	16.0814	1.50066	3.70806	9.56772e-05	0.00048059
KLHL6	4.5297	3.82632	10.5213	8.49983	5.11209	5.45804	17.8854	14.2195	1.47587	5.79082	9.59532e-05	0.000481741
CBFB	15.7995	13.298	8.83109	6.75461	12.9902	13.6398	6.17308	4.6258	-1.48963	5.00904	9.71771e-05	0.000487646
GRM6	0.625504	0.61292	1.13728	1.11789	1.17443	1.02903	2.10578	3.33609	1.50615	3.09982	9.73401e-05	0.000488225
RNF6	6.25024	4.78539	3.47924	2.29727	3.45806	3.6796	1.32808	1.18938	-1.53969	3.57329	9.74342e-05	0.000488458
INTS12	2.47715	2.19047	3.44413	3.89506	2.80094	2.68165	7.70052	8.07413	1.52733	2.8694	9.78413e-05	0.000490259
PCTP	15.3662	16.9236	7.19986	7.85378	20.9202	20.2881	7.03623	7.46406	-1.48685	4.80323	9.82442e-05	0.000491994
RGPD4	1.40591	1.10072	0.914188	0.524324	0.794778	0.745957	0.363215	0.255897	-1.63482	2.46408	9.82836e-05	0.000491994
INSIG1	31.7748	31.1331	22.4778	17.7043	27.4947	28.5657	11.009	9.89222	-1.47478	6.08297	9.8986e-05	0.000495269
PNMA1	0.97301	0.945054	0.620843	0.510917	0.71251	0.99358	0.276184	0.178947	-1.99267	0.821149	9.93925e-05	0.00049706
GSKIP	3.92851	3.69936	2.4658	1.94424	3.45439	3.313	1.4112	1.16531	-1.56762	2.83811	9.95149e-05	0.000497429
HEIH	8.11652	9.07521	14.0358	16.5005	10.6886	9.36585	27.3649	29.8441	1.48136	4.70248	9.95876e-05	0.00049755
LOC100129550	6.45906	5.29314	2.43384	1.67823	3.88569	4.18675	1.70682	1.3681	-1.50596	4.32062	9.98657e-05	0.000498696
MED17	6.80336	6.34218	4.58441	3.20715	5.22617	5.1331	2.62555	1.82812	-1.51535	3.97002	9.99206e-05	0.000498727
RALGAPB	7.08401	5.65557	3.91022	2.67315	3.28294	3.68631	1.51038	1.16265	-1.49755	4.97491	0.000100226	0.000500009
TMEM44-AS1	0.433748	0.258799	0.763391	0.514377	0.953179	0.561006	2.48011	3.00716	1.65736	0.701198	0.000100673	0.000501906
ATXN2	6.16877	5.18743	3.16713	2.43737	3.80841	4.43248	1.40512	1.33328	-1.51416	4.04161	0.000100713	0.000501906
FENDRR	0.308002	0.278422	0.445198	0.514827	0.595768	0.593932	1.03926	1.81512	1.60708	1.13012	0.000100754	0.000501906
[truncated: 3,083 more rows]
